# Supplementary material for: Differential Transcriptomic Profiles Following Stimulation with Lipopolysaccharide in Intestinal Organoids from Dogs with Inflammatory Bowel Disease and Intestinal Mast Cell Tumor
Source: Cancers (Basel). 2022 Jul 20;14(14):3525. doi: 10.3390/cancers14143525 (PMC9322748; doi:10.3390/cancers14143525)
Supplement: Supplementary file 1 [file cancers-14-03525-s001.zip]

Archive with 5 entries (5 files):
- 1. Supplemental Figure S1a-updated.pdf
- 2. Supplemental Figure S1b-updated.pdf
- 3. Supplemental Figure S1c-updated.pdf
- 4. Supplemental Table S1.xlsx
- 5. Supplemental figure Legends.pdf
