# Supplementary material for: Differential Transcriptomic Profiles Following Stimulation with Lipopolysaccharide in Intestinal Organoids from Dogs with Inflammatory Bowel Disease and Intestinal Mast Cell Tumor
Source: Cancers (Basel). 2022 Jul 20;14(14):3525. doi: 10.3390/cancers14143525 (PMC9322748; doi:10.3390/cancers14143525)
Supplement: Supplementary file 1 [file cancers-14-03525-s001.zip › 4. Supplemental Table S1.xlsx]

## Sheet: Contrast1 (a)
	ID	M	A
33442	CfaAffx.2644.1.S1_at	1.73749	2.64892
40150	CfaAffx.6562.1.S1_at	1.5122	4.8624
38018	CfaAffx.3865.1.S1_s_at	1.40278	4.95719
27836	CfaAffx.19540.1.S1_at	1.38397	6.20786
38550	CfaAffx.4509.1.S1_s_at	1.36796	6.33033
20060	CfaAffx.10040.1.S1_s_at	1.29747	3.30066
7883	Cfa.1768.1.A1_at	1.28443	4.48847
22394	CfaAffx.12883.1.S1_s_at	1.26346	3.05171
25245	CfaAffx.1636.1.S1_s_at	1.25657	3.62267
28847	CfaAffx.20747.1.S1_s_at	1.25439	4.17983
40497	CfaAffx.6962.1.S1_at	1.21482	5.04973
6464	Cfa.15731.2.S1_at	1.20046	4.32898
26634	CfaAffx.18063.1.S1_s_at	1.18402	4.28796
10278	Cfa.2021.1.A1_at	1.15834	7.72514
12193	Cfa.2802.1.S1_at	1.1501	5.27544
26694	CfaAffx.18139.1.S1_s_at	1.14851	2.5273
41473	CfaAffx.8158.1.S1_s_at	1.13945	7.13031
1469	Cfa.1126.1.S1_s_at	1.13899	6.21799
12912	Cfa.3510.2.S1_s_at	1.12568	4.86261
3561	Cfa.1307.1.S1_at	1.10742	6.54465
41477	CfaAffx.8163.1.S1_s_at	1.10704	8.0701
7101	Cfa.16649.1.S1_s_at	1.1011	7.76434
9902	Cfa.19842.1.S1_s_at	1.09602	3.78637
15622	Cfa.605.1.S1_at	1.09532	5.28608
10279	Cfa.2021.2.S1_at	1.08201	6.53376
21852	CfaAffx.12240.1.S1_at	1.07793	4.90826
15104	Cfa.557.1.A2_at	1.06707	6.54756
39984	CfaAffx.6356.1.S1_at	1.06702	3.79672
10124	Cfa.20063.1.S1_at	1.06572	5.97823
11900	Cfa.2536.1.A1_at	1.06197	6.49552
7843	Cfa.17628.1.S1_at	1.05931	3.35937
25364	CfaAffx.16510.1.S1_at	1.05697	3.94339
25717	CfaAffx.16943.1.S1_s_at	1.05097	6.11795
34498	CfaAffx.27756.1.S1_at	1.03425	3.87372
37218	CfaAffx.31155.1.S1_s_at	1.03401	3.67672
42050	CfaAffx.8860.1.S1_s_at	1.03388	6.08994
30482	CfaAffx.22774.1.S1_at	1.03254	4.18683
30987	CfaAffx.23428.1.S1_s_at	1.03157	5.33224
21392	CfaAffx.11699.1.S1_s_at	1.03099	7.19232
20482	CfaAffx.10536.1.S1_at	1.0263	3.62235
41050	CfaAffx.7649.1.S1_at	1.02458	3.04771
34015	CfaAffx.27143.1.S1_s_at	1.02048	3.49787
39384	CfaAffx.5601.1.S1_at	1.01127	4.17903
31159	CfaAffx.23661.1.S1_s_at	1.00111	3.72234
1468	Cfa.1126.1.S1_at	0.997434	6.77707
27830	CfaAffx.19534.1.S1_at	0.990407	6.81449
31709	CfaAffx.24355.1.S1_s_at	0.98637	4.29501
28692	CfaAffx.20563.1.S1_at	0.983704	3.7488
29246	CfaAffx.21232.1.S1_s_at	0.979891	2.63144
21620	CfaAffx.11960.1.S1_at	0.976792	5.0977
9243	Cfa.19140.1.A1_at	0.976407	4.71193
4052	Cfa.13527.1.A1_at	0.975782	2.53409
29618	CfaAffx.21714.1.S1_s_at	0.972609	4.47999
1822	Cfa.11570.1.A1_at	0.965171	2.55214
35051	CfaAffx.28429.1.S1_s_at	0.962597	7.16422
10750	Cfa.20816.1.S1_s_at	0.959892	8.18239
22257	CfaAffx.12730.1.S1_at	0.955988	5.8628
23545	CfaAffx.1428.1.S1_at	0.951715	5.74533
35421	CfaAffx.28912.1.S1_at	0.949194	4.69909
6764	Cfa.16225.1.S1_s_at	0.946834	3.12579
21791	CfaAffx.12172.1.S1_s_at	0.946302	4.99832
24257	CfaAffx.15169.1.S1_at	0.939359	8.12411
29619	CfaAffx.21717.1.S1_at	0.936161	4.71656
2313	Cfa.11993.1.S1_at	0.932401	5.0964
23280	CfaAffx.13949.1.S1_s_at	0.931904	3.00189
12735	Cfa.3334.1.A1_s_at	0.929029	7.32176
9269	Cfa.1916.1.S1_at	0.923968	5.69651
7748	Cfa.1752.1.S2_at	0.92395	3.94462
8676	Cfa.18528.1.S1_at	0.92273	3.51131
3030	Cfa.1259.1.S1_at	0.915543	7.19279
22621	CfaAffx.13135.1.S1_at	0.913457	3.54279
9537	Cfa.19493.1.S1_at	0.911748	3.51853
34471	CfaAffx.27726.1.S1_s_at	0.90969	3.71379
10195	Cfa.20133.1.S1_s_at	0.906945	5.84885
25562	CfaAffx.16768.1.S1_at	0.904517	4.59792
11773	Cfa.2419.1.S1_at	0.904002	5.41836
40885	CfaAffx.7429.1.S1_at	0.900599	5.28856
38054	CfaAffx.3912.1.S1_at	0.899579	3.74956
21555	CfaAffx.11894.1.S1_at	0.899454	4.17057
38766	CfaAffx.4763.1.S1_at	0.899199	6.87123
40255	CfaAffx.6693.1.S1_s_at	0.898042	4.56957
12852	Cfa.346.1.A1_at	0.89633	3.79706
34731	CfaAffx.28026.1.S1_s_at	0.895847	3.45088
23145	CfaAffx.13775.1.S1_at	0.891974	2.9761
29679	CfaAffx.21784.1.S1_s_at	0.890358	5.58858
42546	CfaAffx.9455.1.S1_s_at	0.886124	4.5646
4622	Cfa.14057.1.A1_at	0.881839	3.46259
27825	CfaAffx.19526.1.S1_at	0.877017	6.26151
8495	Cfa.18334.1.S1_s_at	0.873813	6.99188
10115	Cfa.20053.1.S1_s_at	0.870084	4.51517
7617	Cfa.1732.1.A1_at	0.869732	2.98376
42961	CfaAffx.9986.1.S1_s_at	0.867578	4.67889
7891	Cfa.1769.2.A1_at	0.865754	6.16333
41203	CfaAffx.7850.1.S1_at	0.86448	3.67458
10724	Cfa.20792.1.S1_at	0.864311	5.09189
29227	CfaAffx.21206.1.S1_at	0.863572	8.00685
9812	Cfa.19753.2.A1_at	0.860651	5.20291
22353	CfaAffx.12837.1.S1_at	0.857316	3.53597
29824	CfaAffx.21960.1.S1_s_at	0.856043	5.08746
37611	CfaAffx.3360.1.S1_at	0.856026	4.08231
40403	CfaAffx.6855.1.S1_at	0.854376	7.46071
19764	Cfa.9716.1.A1_s_at	0.850682	5.39009
21667	CfaAffx.12017.1.S1_at	0.850089	3.60098
10211	Cfa.20146.1.S1_s_at	0.847889	4.17483
8711	Cfa.18570.1.S1_s_at	0.847041	3.16882
9506	Cfa.19466.1.S1_s_at	0.845214	3.31065
33407	CfaAffx.26396.1.S1_s_at	0.841929	6.00375
405	Cfa.103.1.A1_s_at	0.841625	7.63304
35170	CfaAffx.28578.1.S1_at	0.840942	3.09779
15103	Cfa.557.1.A1_s_at	0.839409	5.44083
3428	Cfa.12933.1.A1_at	0.836734	2.86612
39247	CfaAffx.5437.1.S1_s_at	0.834708	5.27462
33406	CfaAffx.26395.1.S1_s_at	0.832645	5.79361
35050	CfaAffx.28426.1.S1_at	0.830334	7.21762
14212	Cfa.4783.1.A1_at	0.825696	3.52199
6575	Cfa.1586.1.S1_s_at	0.820768	2.85323
25449	CfaAffx.16629.1.S1_s_at	0.817396	4.44111
20541	CfaAffx.10617.1.S1_s_at	0.816336	3.14038
10730	Cfa.20797.1.S1_s_at	0.816253	2.88748
22749	CfaAffx.1327.1.S1_s_at	0.814198	6.48052
31315	CfaAffx.23870.1.S1_s_at	0.813587	3.16457
28951	CfaAffx.20855.1.S1_s_at	0.811885	3.90947
23613	CfaAffx.1437.1.S1_at	0.811502	4.80451
34941	CfaAffx.28278.1.S1_at	0.809791	3.98104
36166	CfaAffx.29810.1.S1_at	0.809518	2.78123
220	Cfa.10117.1.A1_at	0.809308	3.93854
410	Cfa.10305.1.S1_at	0.802733	7.45178
6653	Cfa.16026.1.S1_at	0.802156	5.11437
4337	Cfa.13785.1.A1_at	0.801658	3.98542
10701	Cfa.20762.1.S1_s_at	0.800866	7.98587
41523	CfaAffx.8229.1.S1_at	0.800572	4.96921
4801	Cfa.14218.1.A1_at	0.799491	4.29861
18081	Cfa.818.1.A1_at	0.799288	8.56901
22676	CfaAffx.13194.1.S1_s_at	0.797198	5.12273
8514	Cfa.18355.1.S1_at	0.796291	5.71687
601	Cfa.10480.1.A1_at	0.795842	6.47339
11653	Cfa.2315.1.S1_s_at	0.795838	9.78534
42471	CfaAffx.9359.1.S1_at	0.795779	3.40378
7348	Cfa.16984.1.S1_s_at	0.795399	8.71397
39583	CfaAffx.5861.1.S1_s_at	0.795275	3.77163
25578	CfaAffx.16789.1.S1_at	0.794275	5.99554
11175	Cfa.21262.1.S1_at	0.792991	8.74735
36971	CfaAffx.30850.1.S1_s_at	0.79126	3.93321
11714	Cfa.2367.1.A1_at	0.790159	6.81381
19065	Cfa.9015.1.A1_at	0.78201	3.95559
35168	CfaAffx.28575.1.S1_at	0.781809	6.43999
13417	Cfa.3934.1.S1_at	0.781686	9.05229
30487	CfaAffx.22779.1.S1_s_at	0.781594	2.81426
39032	CfaAffx.5132.1.S1_at	0.780799	4.41849
7929	Cfa.17732.1.S1_s_at	0.779786	3.38496
29228	CfaAffx.21206.1.S1_s_at	0.777989	8.18786
187	Cfa.10083.1.S1_at	0.77748	3.84781
36972	CfaAffx.30851.1.S1_s_at	0.777479	4.42565
19900	Cfa.9868.1.A1_at	0.777272	6.66423
33182	CfaAffx.26126.1.S1_s_at	0.777106	3.27332
13137	Cfa.3707.1.A1_s_at	0.774345	3.11062
4040	Cfa.13513.1.A1_at	0.772866	2.9708
36963	CfaAffx.30843.1.S1_s_at	0.772751	3.26739
39246	CfaAffx.5436.1.S1_at	0.770159	3.35795
21528	CfaAffx.11867.1.S1_at	0.769781	3.74214
31107	CfaAffx.23592.1.S1_s_at	0.769462	4.57314
27748	CfaAffx.19418.1.S1_at	0.768402	3.15576
40089	CfaAffx.6489.1.S1_at	0.76693	3.93389
40747	CfaAffx.7262.1.S1_at	0.764283	4.96592
5554	Cfa.14920.1.A1_at	0.763298	4.3532
27171	CfaAffx.18708.1.S1_at	0.76318	4.14027
10545	Cfa.20553.1.S1_s_at	0.763098	6.15644
19580	Cfa.9525.1.A1_at	0.761578	4.19894
4376	Cfa.13822.1.A1_at	0.760846	3.62502
39187	CfaAffx.5356.1.S1_at	0.759873	3.51072
22165	CfaAffx.12618.1.S1_at	0.759201	6.3748
41147	CfaAffx.7779.1.S1_at	0.75889	2.45741
9013	Cfa.1889.2.S1_at	0.757088	4.71027
30929	CfaAffx.23345.1.S1_s_at	0.754629	10.2491
29906	CfaAffx.22060.1.S1_s_at	0.752871	4.45513
8705	Cfa.18565.1.S1_at	0.752338	3.73003
21563	CfaAffx.11900.1.S1_at	0.751867	5.79247
16408	Cfa.675.1.A1_s_at	0.751821	7.62918
10899	Cfa.20964.1.S1_at	0.750539	5.84336
8034	Cfa.1783.1.A1_at	0.748975	6.62885
9958	Cfa.19901.1.S1_s_at	0.748091	7.20492
9811	Cfa.19753.1.S1_at	0.746728	4.81626
9851	Cfa.19790.1.S1_at	0.745552	4.05573
10890	Cfa.20953.1.S1_s_at	0.74516	7.10511
25825	CfaAffx.17068.1.S1_at	0.744366	4.7729
26641	CfaAffx.18074.1.S1_at	0.74304	2.53316
41095	CfaAffx.7712.1.S1_s_at	0.742642	4.1285
25335	CfaAffx.16477.1.S1_at	0.740268	4.9789
29809	CfaAffx.21941.1.S1_at	0.73802	6.0161
30786	CfaAffx.23166.1.S1_at	0.737895	5.6858
21457	CfaAffx.11777.1.S1_s_at	0.737411	5.41339
25622	CfaAffx.16837.1.S1_at	0.735899	8.65158
13174	Cfa.3736.1.S1_s_at	0.735565	3.92946
11880	Cfa.2519.1.A1_at	0.735115	8.53367
5326	Cfa.14711.1.A1_at	0.73406	3.36194
33405	CfaAffx.26393.1.S1_s_at	0.732864	6.34675
26662	CfaAffx.18102.1.S1_at	0.732784	3.42381
26180	CfaAffx.17496.1.S1_s_at	0.732695	4.00306
9621	Cfa.19570.1.S1_at	0.73253	3.59772
6769	Cfa.16230.1.S1_s_at	0.731824	2.78256
22646	CfaAffx.1316.1.S1_s_at	0.731564	3.46756
23021	CfaAffx.13602.1.S1_at	0.730093	5.67516
18966	Cfa.8913.1.A1_at	0.729059	6.64342
38100	CfaAffx.3960.1.S1_at	0.728106	5.62052
14390	Cfa.4942.1.A1_s_at	0.727897	4.52468
16706	Cfa.6995.1.A1_at	0.72731	2.61856
35774	CfaAffx.29324.1.S1_at	0.726739	4.70294
21887	CfaAffx.12278.1.S1_s_at	0.726191	2.90759
14727	Cfa.5245.1.A1_at	0.725669	4.55006
7082	Cfa.1662.1.A1_at	0.722826	4.8416
37992	CfaAffx.3826.1.S1_s_at	0.722292	5.64654
41343	CfaAffx.801.1.S1_x_at	0.722082	4.45231
22603	CfaAffx.13116.1.S1_at	0.721315	2.62542
24966	CfaAffx.16020.1.S1_at	0.721202	4.24068
11294	Cfa.21386.2.S1_at	0.720358	3.02468
706	Cfa.10565.1.A1_at	0.717807	2.93522
8608	Cfa.18453.1.S1_s_at	0.717551	6.23162
34629	CfaAffx.27914.1.S1_s_at	0.716077	4.71846
9615	Cfa.19566.1.S1_at	0.714595	5.42847
24325	CfaAffx.15239.1.S1_at	0.713245	6.65168
28462	CfaAffx.20299.1.S1_s_at	0.712844	6.17915
11117	Cfa.21178.2.S1_a_at	0.712292	5.83346
20151	CfaAffx.10154.1.S1_at	0.712116	3.53247
17344	Cfa.7546.1.A1_at	0.710188	3.60459
42748	CfaAffx.9705.1.S1_s_at	0.70948	7.17506
35312	CfaAffx.28758.1.S1_at	0.709292	4.50643
8751	Cfa.18609.1.S1_s_at	0.708388	3.44221
5798	Cfa.15130.1.A1_s_at	0.708218	2.63229
21792	CfaAffx.12174.1.S1_s_at	0.70778	5.75456
9153	Cfa.19030.1.S1_s_at	0.707172	5.42541
42949	CfaAffx.9968.1.S1_at	0.706276	4.80762
10101	Cfa.20040.1.S1_s_at	0.706147	6.16393
11695	Cfa.235.1.A1_at	0.705941	7.82201
40410	CfaAffx.6861.1.S1_s_at	0.70588	5.60266
40208	CfaAffx.6637.1.S1_at	0.702842	4.51743
27819	CfaAffx.19518.1.S1_at	0.701902	5.45369
35772	CfaAffx.29322.1.S1_s_at	0.70186	4.48846
30258	CfaAffx.22478.1.S1_s_at	0.701338	4.57088
24347	CfaAffx.15265.1.S1_at	0.698915	3.64396
41440	CfaAffx.8116.1.S1_at	0.69867	3.40207
20665	CfaAffx.10782.1.S1_at	0.698201	5.07543
546	Cfa.10428.1.A1_at	0.697649	5.02116
3031	Cfa.1259.1.S1_s_at	0.696713	5.30417
37934	CfaAffx.3761.1.S1_s_at	0.695496	4.59487
11116	Cfa.21178.1.S1_s_at	0.695433	6.50865
9590	Cfa.19541.2.A1_at	0.694861	6.57495
41632	CfaAffx.8359.1.S1_at	0.694182	3.56266
29352	CfaAffx.21371.1.S1_s_at	0.693342	3.40202
1012	Cfa.10830.2.A1_s_at	0.693327	5.1852
32149	CfaAffx.2489.1.S1_s_at	0.693159	4.94806
20471	CfaAffx.10521.1.S1_s_at	0.69304	3.45156
21064	CfaAffx.11249.1.S1_s_at	0.692438	5.70588
10351	Cfa.20286.1.S1_at	0.692113	4.3211
12269	Cfa.2870.1.A1_at	0.690653	2.4696
24235	CfaAffx.15144.1.S1_s_at	0.690149	4.60595
11688	Cfa.2346.1.A1_s_at	0.689086	8.1995
41475	CfaAffx.816.1.S1_at	0.688908	3.5507
39310	CfaAffx.5519.1.S1_s_at	0.688451	6.00598
27847	CfaAffx.19556.1.S1_s_at	0.687228	5.23333
21532	CfaAffx.11870.1.S1_s_at	0.686013	4.82946
6910	Cfa.16376.1.A1_at	0.685239	4.60825
9533	Cfa.19491.1.S1_at	0.684786	2.46199
30757	CfaAffx.23135.1.S1_s_at	0.684383	8.08
7239	Cfa.16832.1.S1_at	0.68278	3.59907
11655	Cfa.2317.1.A1_at	0.681889	4.6244
4540	Cfa.13983.1.S1_s_at	0.681712	8.05225
24108	CfaAffx.14976.1.S1_at	0.68029	4.1255
11415	Cfa.2156.1.S1_at	0.679945	3.44736
30865	CfaAffx.23270.1.S1_s_at	0.678532	4.6223
22792	CfaAffx.13320.1.S1_at	0.677136	3.1141
10879	Cfa.20943.1.S1_s_at	0.675949	3.26393
36824	CfaAffx.30659.1.S1_s_at	0.675533	3.17574
24483	CfaAffx.15427.1.S1_at	0.675034	7.02724
35433	CfaAffx.28932.1.S1_s_at	0.67349	2.97146
11831	Cfa.2475.1.A1_at	0.672429	10.2649
41815	CfaAffx.857.1.S1_at	0.671799	5.95235
23581	CfaAffx.14326.1.S1_s_at	0.6713	6.44582
15662	Cfa.6086.1.A1_s_at	0.671245	6.27985
40090	CfaAffx.6489.1.S1_s_at	0.670765	7.07379
25630	CfaAffx.16847.1.S1_at	0.670553	3.16946
23960	CfaAffx.14811.1.S1_at	0.670259	7.26508
28026	CfaAffx.19773.1.S1_s_at	0.667337	5.67353
36839	CfaAffx.30676.1.S1_s_at	0.66715	4.36883
11435	Cfa.21584.1.S1_s_at	0.667026	7.44268
19276	Cfa.9228.1.A1_s_at	0.666495	8.06306
38487	CfaAffx.4420.1.S1_s_at	0.666412	3.86359
10902	Cfa.20967.1.S1_s_at	0.666316	8.02582
13745	Cfa.439.1.S1_at	0.666274	8.25614
4379	Cfa.13826.1.A1_at	0.665905	4.77198
10082	Cfa.20020.1.S1_at	0.664577	4.92694
34417	CfaAffx.27657.1.S1_at	0.663834	4.69022
37108	CfaAffx.31015.1.S1_at	0.662909	6.2809
25513	CfaAffx.1671.1.S1_s_at	0.662113	3.02198
8731	Cfa.18590.1.S1_at	0.661984	2.86851
5346	Cfa.1473.1.A1_at	0.66162	3.39691
15089	Cfa.5557.1.A1_at	0.661582	4.53731
26489	CfaAffx.17880.1.S1_s_at	0.661236	3.10083
10006	Cfa.19950.1.S1_s_at	0.661165	4.63171
21879	CfaAffx.1227.1.S1_s_at	0.661131	5.18139
11039	Cfa.21106.1.S1_s_at	0.660618	10.8287
8114	Cfa.17911.1.S1_s_at	0.659976	5.86583
38319	CfaAffx.4220.1.S1_at	0.659267	4.91249
33740	CfaAffx.2680.1.S1_s_at	0.658867	3.65345
21682	CfaAffx.12034.1.S1_at	0.658715	3.07826
11025	Cfa.21092.1.S1_s_at	0.658365	9.20002
443	Cfa.10333.1.A1_s_at	0.658305	4.37916
23539	CfaAffx.14273.1.S1_at	0.657942	3.01536
27811	CfaAffx.1951.1.S1_s_at	0.657913	3.61757
38173	CfaAffx.4051.1.S1_s_at	0.65701	5.71466
22748	CfaAffx.1327.1.S1_at	0.656152	6.56221
25292	CfaAffx.16422.1.S1_s_at	0.656059	5.38567
38232	CfaAffx.411.1.S1_at	0.655983	5.96972
1331	Cfa.11126.1.A1_at	0.655214	5.43975
37976	CfaAffx.3810.1.S1_at	0.654149	3.41852
37495	CfaAffx.3217.1.S1_s_at	0.65319	3.59671
15296	Cfa.5751.1.A1_s_at	0.652279	3.73107
22767	CfaAffx.13286.1.S1_at	0.651754	6.07181
30699	CfaAffx.23062.1.S1_at	0.651049	5.39896
18258	Cfa.8331.2.S1_at	0.650313	2.67731
42038	CfaAffx.8844.1.S1_s_at	0.650229	4.10736
28042	CfaAffx.198.1.S1_at	0.649435	4.12888
26684	CfaAffx.18128.1.S1_s_at	0.648732	3.89712
12036	Cfa.2664.1.A1_at	0.648327	5.73346
21224	CfaAffx.11464.1.S1_at	0.6483	3.9397
35083	CfaAffx.2847.1.S1_at	0.646397	3.29844
38451	CfaAffx.4376.1.S1_s_at	0.645893	3.96862
32224	CfaAffx.24974.1.S1_s_at	0.64515	5.99663
7583	Cfa.17280.1.S1_s_at	0.644486	6.84067
3112	Cfa.12653.3.A1_a_at	0.644302	4.95721
18719	Cfa.87.1.S1_s_at	0.644237	6.64359
11907	Cfa.2541.1.A1_at	0.642706	5.50715
39220	CfaAffx.5396.1.S1_at	0.642189	3.61513
8204	Cfa.18008.1.S1_s_at	0.641958	3.68235
30331	CfaAffx.22580.1.S1_s_at	0.641758	6.52147
39649	CfaAffx.5937.1.S1_s_at	0.641128	7.06637
33408	CfaAffx.26397.1.S1_s_at	0.641112	5.23755
28686	CfaAffx.20555.1.S1_s_at	0.640367	4.85136
5706	Cfa.15054.1.A1_s_at	0.640031	7.26142
847	Cfa.10683.1.S1_s_at	0.63943	3.67903
9513	Cfa.19473.1.S1_at	0.6383	2.72634
34650	CfaAffx.27936.1.S1_at	0.637858	8.08687
23510	CfaAffx.14237.1.S1_s_at	0.637831	2.88095
19264	Cfa.9217.1.A1_at	0.637242	4.25697
4296	Cfa.13747.1.A1_at	0.637141	3.16593
20907	CfaAffx.11063.1.S1_s_at	0.636904	6.87259
9020	Cfa.18897.1.S1_s_at	0.636829	5.88777
29990	CfaAffx.22162.1.S1_at	0.636812	3.22839
11419	Cfa.21566.1.S1_at	0.63657	3.19831
21963	CfaAffx.12376.1.S1_at	0.636528	2.47672
20860	CfaAffx.11008.1.S1_s_at	0.636138	3.0009
1779	Cfa.11533.1.A1_at	0.635344	2.8239
37411	CfaAffx.32007.1.S1_s_at	0.635218	2.43743
20292	CfaAffx.10308.1.S1_at	0.635168	4.60633
12246	Cfa.2848.2.S1_at	0.635103	8.16736
2540	Cfa.12191.1.A1_at	0.634748	4.16093
41516	CfaAffx.8217.1.S1_s_at	0.634562	6.00846
10677	Cfa.20735.1.S1_s_at	0.634204	7.83072
20994	CfaAffx.11155.1.S1_s_at	0.634087	6.75573
36650	CfaAffx.30448.1.S1_at	0.633948	3.37069
17049	Cfa.7297.1.A1_at	0.633944	3.59208
39796	CfaAffx.6138.1.S1_s_at	0.633778	3.5113
12370	Cfa.2964.1.A1_at	0.633714	4.58998
34620	CfaAffx.27901.1.S1_s_at	0.633513	4.85617
26635	CfaAffx.18064.1.S1_s_at	0.631527	6.70065
11423	Cfa.2157.1.A1_a_at	0.631477	4.54317
36749	CfaAffx.30571.1.S1_at	0.631436	3.91274
5103	Cfa.14509.1.A1_s_at	0.631037	4.18762
11923	Cfa.2558.1.A1_at	0.630807	4.76109
38957	CfaAffx.5046.1.S1_s_at	0.630799	4.07824
41867	CfaAffx.8635.1.S1_at	0.630478	3.20205
12162	Cfa.2773.2.A1_s_at	0.629452	6.76927
32997	CfaAffx.25885.1.S1_s_at	0.627534	4.28052
26815	CfaAffx.18295.1.S1_s_at	0.627415	3.29422
19083	Cfa.9037.1.A1_at	0.627387	5.84609
1382	Cfa.11173.1.A1_s_at	0.624956	6.73921
21291	CfaAffx.11564.1.S1_s_at	0.624664	6.35322
20273	CfaAffx.10288.1.S1_at	0.624623	3.69281
39255	CfaAffx.5446.1.S1_s_at	0.62403	5.8653
23694	CfaAffx.14483.1.S1_s_at	0.623802	3.38777
26756	CfaAffx.18216.1.S1_s_at	0.623327	8.29376
21812	CfaAffx.12202.1.S1_s_at	0.623105	6.3073
10353	Cfa.20289.1.S1_s_at	0.622872	6.02687
36395	CfaAffx.30089.1.S1_at	0.622842	2.51354
26569	CfaAffx.17985.1.S1_s_at	0.62222	5.90832
18715	Cfa.8696.1.A1_at	0.622197	2.70906
11183	Cfa.21270.1.S1_s_at	0.622122	5.35923
32034	CfaAffx.24776.1.S1_s_at	0.622114	2.97128
9536	Cfa.19492.2.A1_at	0.62176	3.49383
39072	CfaAffx.5187.1.S1_s_at	0.621728	6.39088
9541	Cfa.19497.1.S1_at	0.621571	9.35028
15023	Cfa.550.1.S1_s_at	0.621252	8.28203
36756	CfaAffx.30579.1.S1_at	0.620605	4.41493
22956	CfaAffx.13523.1.S1_at	0.62016	8.19859
33416	CfaAffx.26406.1.S1_s_at	0.620077	3.55653
8303	Cfa.18132.1.S1_s_at	0.620028	5.23449
20129	CfaAffx.10125.1.S1_at	0.619663	8.3814
1156	Cfa.10957.1.A1_at	0.619374	7.63822
21935	CfaAffx.12340.1.S1_at	0.619174	4.11786
24956	CfaAffx.16008.1.S1_at	0.617307	5.64204
35151	CfaAffx.28557.1.S1_s_at	0.615105	5.10547
27235	CfaAffx.18785.1.S1_at	0.614685	6.0348
30659	CfaAffx.23012.1.S1_at	0.614285	4.4135
16898	Cfa.7165.1.S1_s_at	0.613223	2.84932
37022	CfaAffx.30907.1.S1_s_at	0.61265	4.18703
28295	CfaAffx.20096.1.S1_at	0.612626	4.4006
40935	CfaAffx.7499.1.S1_s_at	0.612343	5.68592
5633	Cfa.14989.2.A1_s_at	0.611889	4.45203
7701	Cfa.17418.1.S1_s_at	0.611403	3.45186
24036	CfaAffx.14897.1.S1_at	0.611105	7.88868
33637	CfaAffx.26669.1.S1_at	0.611103	4.02285
3935	Cfa.13413.1.A1_at	0.610825	2.43187
31926	CfaAffx.24625.1.S1_at	0.610669	3.26707
31632	CfaAffx.24253.1.S1_s_at	0.609519	2.62513
23615	CfaAffx.14372.1.S1_at	0.609325	3.45901
24348	CfaAffx.15265.1.S1_s_at	0.608422	4.56734
42051	CfaAffx.8861.1.S1_at	0.607812	3.23239
22434	CfaAffx.12930.1.S1_at	0.607725	4.9038
15598	Cfa.6026.1.A1_s_at	0.607665	4.59339
23728	CfaAffx.14530.1.S1_s_at	0.607135	4.10706
12814	Cfa.342.1.A1_at	0.606364	7.83943
38499	CfaAffx.4440.1.S1_at	0.605591	5.50674
18770	Cfa.8744.1.A1_s_at	0.605535	5.04216
26983	CfaAffx.18492.1.S1_s_at	0.605525	9.77238
23771	CfaAffx.14587.1.S1_at	0.605426	5.46272
25758	CfaAffx.16988.1.S1_s_at	0.605333	4.94167
8494	Cfa.18334.1.S1_at	0.605163	5.3337
10137	Cfa.20078.1.S1_s_at	0.605047	4.78659
29189	CfaAffx.21165.1.S1_at	0.604578	4.34384
6382	Cfa.15666.1.A1_at	0.603775	3.88516
7769	Cfa.1755.1.S1_s_at	0.601657	5.23436
40254	CfaAffx.6693.1.S1_at	0.60142	6.26166
41110	CfaAffx.773.1.S1_x_at	0.60128	3.74196
14528	Cfa.507.1.A1_at	0.600268	8.06882
35039	CfaAffx.28412.1.S1_at	0.599866	4.1578
42467	CfaAffx.9355.1.S1_at	0.599308	4.4283
12206	Cfa.2814.1.A1_at	0.598952	5.87267
9450	Cfa.19411.1.S1_at	0.598824	4.62519
13723	Cfa.4360.1.S1_s_at	0.598519	10.6835
13249	Cfa.3790.1.S1_s_at	0.598339	3.28187
33468	CfaAffx.26473.1.S1_at	0.598061	3.36871
30051	CfaAffx.22248.1.S1_s_at	0.598051	3.1594
39269	CfaAffx.5463.1.S1_at	0.59775	7.65589
14056	Cfa.4650.1.A1_s_at	0.597603	4.21131
19449	Cfa.9399.1.A1_at	0.597361	4.91832
10766	Cfa.20837.1.S1_s_at	0.596613	4.96015
12749	Cfa.3344.1.S1_at	0.596608	9.32285
5886	Cfa.15205.1.S1_at	0.595671	4.37952
19755	Cfa.9706.1.A1_a_at	0.595646	2.91099
24099	CfaAffx.14969.1.S1_at	0.595574	5.05962
34844	CfaAffx.28156.1.S1_at	0.595407	4.00249
37187	CfaAffx.31102.1.S1_s_at	0.594897	2.89584
14236	Cfa.4802.1.S1_at	0.594702	3.18459
754	Cfa.1060.1.S1_at	0.593279	8.76954
38604	CfaAffx.4575.1.S1_s_at	0.593137	3.81019
26652	CfaAffx.1809.1.S1_at	0.593084	2.79905
9031	Cfa.18904.1.S1_s_at	0.591956	6.72416
22824	CfaAffx.13362.1.S1_at	0.59073	2.6911
12051	Cfa.2677.1.S1_s_at	0.590382	3.97824
26054	CfaAffx.17356.1.S1_at	0.590178	3.85663
35430	CfaAffx.28928.1.S1_at	0.589748	2.65252
12180	Cfa.2791.1.A1_at	0.589541	5.89981
25232	CfaAffx.16340.1.S1_s_at	0.589046	3.93481
27303	CfaAffx.18884.1.S1_s_at	0.588715	5.82702
40744	CfaAffx.7255.1.S1_s_at	0.588117	8.10882
22199	CfaAffx.12657.1.S1_s_at	0.588024	2.46187
23143	CfaAffx.13770.1.S1_s_at	0.587662	4.97717
29576	CfaAffx.21663.1.S1_s_at	0.587455	3.94109
2695	Cfa.12309.1.A1_s_at	0.587396	3.17652
30290	CfaAffx.22525.1.S1_s_at	0.587181	4.07458
21747	CfaAffx.12118.1.S1_s_at	0.587173	7.85136
30196	CfaAffx.22403.1.S1_at	0.58691	4.32007
39103	CfaAffx.5232.1.S1_s_at	0.585895	5.10814
35396	CfaAffx.28874.1.S1_at	0.585526	3.52974
39543	CfaAffx.5810.1.S1_at	0.585225	2.88647
32549	CfaAffx.25352.1.S1_at	0.585184	2.45062
25492	CfaAffx.16687.1.S1_s_at	0.584421	3.41672
42398	CfaAffx.9271.1.S1_s_at	0.584368	6.27378
32509	CfaAffx.25305.1.S1_s_at	0.584273	3.05307
30904	CfaAffx.2332.1.S1_at	0.583916	4.06686
31409	CfaAffx.23978.1.S1_s_at	0.58367	5.52853
9973	Cfa.19918.1.S1_s_at	0.583056	3.8405
31479	CfaAffx.24056.1.S1_at	0.581408	3.58078
32687	CfaAffx.25510.1.S1_at	0.581379	3.33732
17111	Cfa.735.1.S1_at	0.580947	2.45391
20469	CfaAffx.10519.1.S1_at	0.580874	4.4085
12167	Cfa.2778.1.S1_at	0.58024	2.98293
20463	CfaAffx.10510.1.S1_s_at	0.579949	10.2901
12245	Cfa.2848.1.S1_s_at	0.579568	9.54011
13423	Cfa.3940.1.A1_at	0.579345	7.28885
2008	Cfa.11737.1.A1_at	0.579246	3.98303
7063	Cfa.16589.1.S1_at	0.578897	2.60416
6252	Cfa.15547.1.A1_s_at	0.577943	6.80407
5439	Cfa.14818.1.A1_at	0.577728	3.62445
36810	CfaAffx.30644.1.S1_at	0.576155	5.15323
21236	CfaAffx.11480.1.S1_at	0.575909	4.60268
29935	CfaAffx.22089.1.S1_s_at	0.575187	8.73124
22936	CfaAffx.13499.1.S1_at	0.575165	2.94672
36861	CfaAffx.30702.1.S1_s_at	0.574806	2.43983
29914	CfaAffx.2207.1.S1_at	0.57378	3.57227
7606	Cfa.17305.1.S1_x_at	0.573446	3.94069
4878	Cfa.1429.1.S1_at	0.573248	8.56024
37351	CfaAffx.3133.1.S1_at	0.572796	5.8346
9483	Cfa.19444.1.S1_at	0.572556	8.11899
37086	CfaAffx.30980.1.S1_s_at	0.572372	4.9364
29513	CfaAffx.21587.1.S1_at	0.571513	8.82654
34293	CfaAffx.27496.1.S1_s_at	0.571023	3.96434
13938	Cfa.4554.1.S1_s_at	0.570959	3.83331
29882	CfaAffx.2203.1.S1_at	0.570942	2.62348
8394	Cfa.18217.1.S1_s_at	0.570683	5.5439
35481	CfaAffx.28990.1.S1_s_at	0.569728	3.56551
7467	Cfa.17135.1.S1_s_at	0.569676	8.11405
12472	Cfa.3064.1.A1_at	0.569359	3.491
26147	CfaAffx.17456.1.S1_at	0.56885	5.05406
14304	Cfa.4866.1.A1_at	0.568763	6.50437
27305	CfaAffx.18887.1.S1_s_at	0.568732	4.70488
19310	Cfa.9266.1.A1_s_at	0.568627	6.9662
31385	CfaAffx.23952.1.S1_at	0.567927	6.16785
32580	CfaAffx.25386.1.S1_s_at	0.567847	6.2935
9314	Cfa.19193.1.S1_at	0.567252	4.05911
19213	Cfa.9163.1.S1_s_at	0.567206	6.91884
696	Cfa.10558.2.S1_at	0.56641	2.60361
31508	CfaAffx.24095.1.S1_s_at	0.566229	2.42577
10427	Cfa.20363.2.A1_at	0.566053	4.16564
26937	CfaAffx.18441.1.S1_at	0.565433	4.7776
42446	CfaAffx.9322.1.S1_s_at	0.565027	5.05764
1503	Cfa.11288.1.A1_s_at	0.564389	3.6969
37180	CfaAffx.31094.1.S1_s_at	0.563792	5.22261
27827	CfaAffx.19528.1.S1_s_at	0.563626	5.5254
16562	Cfa.6877.1.A1_s_at	0.563232	2.96395
27948	CfaAffx.19677.1.S1_at	0.56312	2.49758
11891	Cfa.2529.1.S1_at	0.563062	5.72887
32774	CfaAffx.25618.1.S1_at	0.563024	5.44463
11478	Cfa.21630.1.S1_at	0.562933	9.11506
31712	CfaAffx.24358.1.S1_s_at	0.562893	3.46928
9088	Cfa.18966.1.S1_s_at	0.562667	5.17486
531	Cfa.10413.2.S1_s_at	0.562469	4.75855
29380	CfaAffx.21406.1.S1_at	0.561896	5.56615
25725	CfaAffx.16952.1.S1_at	0.561386	4.16141
33000	CfaAffx.25890.1.S1_s_at	0.560848	3.20478
29517	CfaAffx.21591.1.S1_s_at	0.56005	8.34687
31387	CfaAffx.23955.1.S1_s_at	0.559512	6.45378
3506	Cfa.13019.1.A1_x_at	0.559492	3.16098
31805	CfaAffx.24461.1.S1_s_at	0.558904	2.96603
37264	CfaAffx.31203.1.S1_s_at	0.558891	7.83829
38383	CfaAffx.4292.1.S1_at	0.557801	6.13428
27578	CfaAffx.19215.1.S1_s_at	0.556576	8.1059
10873	Cfa.20937.1.S1_s_at	0.556248	6.00169
27481	CfaAffx.19093.1.S1_at	0.555992	4.97851
31501	CfaAffx.24089.1.S1_at	0.55524	4.7704
41204	CfaAffx.7851.1.S1_at	0.554764	5.33619
37782	CfaAffx.3570.1.S1_s_at	0.554341	10.3439
26072	CfaAffx.17374.1.S1_s_at	0.552522	3.78469
35841	CfaAffx.29408.1.S1_at	0.552398	2.4601
40567	CfaAffx.7041.1.S1_s_at	0.552107	5.98624
33929	CfaAffx.2704.1.S1_at	0.551902	4.04163
42718	CfaAffx.9664.1.S1_at	0.551708	3.71464
38984	CfaAffx.5074.1.S1_at	0.551309	2.55437
31834	CfaAffx.24504.1.S1_s_at	0.551287	4.16779
27647	CfaAffx.19292.1.S1_s_at	0.550843	5.27812
9128	Cfa.19009.1.S1_s_at	0.550704	7.58291
25053	CfaAffx.16127.1.S1_at	0.550465	2.4218
27199	CfaAffx.18740.1.S1_s_at	0.550234	4.27225
30325	CfaAffx.22573.1.S1_s_at	0.550054	6.01295
11600	Cfa.2270.2.S1_at	0.549472	4.63239
34218	CfaAffx.27395.1.S1_at	0.5491	3.48479
28977	CfaAffx.20898.1.S1_s_at	0.548976	4.41106
23162	CfaAffx.13793.1.S1_s_at	0.548762	2.90648
1273	Cfa.11073.1.A1_at	0.548524	2.90591
19880	Cfa.9849.1.S1_at	0.548311	5.55174
2155	Cfa.1186.1.A1_a_at	0.548308	3.63331
5147	Cfa.14547.1.A1_at	0.547871	4.16067
20509	CfaAffx.10569.1.S1_s_at	0.547736	3.17008
39866	CfaAffx.6214.1.S1_at	0.54692	4.57068
24549	CfaAffx.15510.1.S1_s_at	0.546237	2.87378
35349	CfaAffx.28801.1.S1_s_at	0.546158	4.31924
19418	Cfa.9372.1.A1_at	0.54605	5.06785
28677	CfaAffx.20546.1.S1_s_at	0.545845	7.67503
34697	CfaAffx.27989.1.S1_s_at	0.545659	3.52281
12989	Cfa.358.1.S1_at	0.544953	4.6451
9697	Cfa.19642.1.S1_s_at	0.544731	7.89784
13218	Cfa.3766.1.S1_at	0.544293	5.40523
42571	CfaAffx.9498.1.S1_at	0.544224	4.97288
32165	CfaAffx.24902.1.S1_s_at	0.5439	2.7009
34797	CfaAffx.28101.1.S1_s_at	0.543676	5.04268
1376	Cfa.1117.1.A1_at	0.54353	3.43325
36983	CfaAffx.30864.1.S1_at	0.543314	4.08491
529	Cfa.10413.1.S1_at	0.543055	3.2492
38386	CfaAffx.4294.1.S1_s_at	0.542484	8.07458
39107	CfaAffx.5236.1.S1_at	0.541691	4.16795
7375	Cfa.17019.1.S1_at	0.541566	2.59453
10214	Cfa.20149.1.S1_at	0.541287	4.69111
13140	Cfa.3709.1.S1_s_at	0.541067	3.63512
41037	CfaAffx.7630.1.S1_s_at	0.539524	5.67413
25686	CfaAffx.16904.1.S1_s_at	0.539028	2.75035
1246	Cfa.11045.1.S1_s_at	0.538838	8.6241
26177	CfaAffx.17493.1.S1_s_at	0.538015	6.57331
40326	CfaAffx.6771.1.S1_s_at	0.538013	4.77692
35703	CfaAffx.29253.1.S1_s_at	0.537801	2.9926
26928	CfaAffx.18430.1.S1_at	0.537487	2.94265
27426	CfaAffx.19038.1.S1_s_at	0.53736	5.63561
34700	CfaAffx.27992.1.S1_s_at	0.537172	6.18893
715	Cfa.10569.1.A1_s_at	0.536959	3.80172
8505	Cfa.18345.1.S1_at	0.536732	4.19587
6349	Cfa.15635.1.A1_s_at	0.536717	2.97782
25646	CfaAffx.16862.1.S1_s_at	0.536635	5.1345
41929	CfaAffx.8713.1.S1_s_at	0.536547	2.42406
19967	Cfa.9936.1.A1_at	0.536202	8.49684
16788	Cfa.7066.1.S1_s_at	0.536145	5.24131
35846	CfaAffx.29414.1.S1_s_at	0.53609	5.1354
40670	CfaAffx.7166.1.S1_s_at	0.536051	6.17871
37614	CfaAffx.3362.1.S1_s_at	0.535987	4.99543
31630	CfaAffx.24251.1.S1_at	0.535891	3.27549
30056	CfaAffx.22251.1.S1_s_at	0.53582	4.59537
19443	Cfa.9394.1.S1_at	0.535788	8.96108
18655	Cfa.8649.1.A1_at	0.535661	3.22251
19624	Cfa.9571.1.A1_at	0.535653	5.36707
9736	Cfa.19683.1.S1_at	0.535126	6.50511
6163	Cfa.15466.1.S1_s_at	0.534864	7.06193
35226	CfaAffx.28651.1.S1_s_at	0.534536	3.4915
3288	Cfa.1281.1.S1_at	0.534434	3.02252
31384	CfaAffx.23951.1.S1_s_at	0.534332	2.85697
8097	Cfa.17895.1.S1_s_at	0.534053	8.98002
35502	CfaAffx.29015.1.S1_at	0.53394	2.49159
11591	Cfa.2263.1.A1_s_at	0.533759	8.31647
14879	Cfa.5372.1.A1_at	0.533407	5.56131
18211	Cfa.8295.1.S1_at	0.533397	5.50114
19911	Cfa.988.1.S1_at	0.533256	8.42092
8717	Cfa.18576.1.S1_at	0.532954	4.35954
23961	CfaAffx.14811.1.S1_s_at	0.532926	7.20086
16607	Cfa.6912.1.A1_at	0.532812	2.41899
6244	Cfa.1554.1.A1_at	0.532521	6.33252
32763	CfaAffx.25605.1.S1_at	0.532068	6.29711
23605	CfaAffx.14363.1.S1_at	0.53195	6.05773
23736	CfaAffx.14542.1.S1_at	0.531769	3.03728
12911	Cfa.3510.1.S2_at	0.531427	7.71723
13437	Cfa.3955.1.A1_s_at	0.531288	7.53288
35068	CfaAffx.28449.1.S1_at	0.531167	5.17462
3043	Cfa.126.1.S1_s_at	0.531034	7.70007
22838	CfaAffx.13379.1.S1_at	0.529658	3.49337
29988	CfaAffx.22160.1.S1_at	0.529478	7.54019
19267	Cfa.922.1.A1_at	0.528405	9.48885
14522	Cfa.5063.1.S1_at	0.528301	3.82633
1685	Cfa.11446.1.S1_s_at	0.52823	5.79716
10352	Cfa.20287.1.S1_s_at	0.527207	4.30243
37968	CfaAffx.3799.1.S1_at	0.526999	3.65693
40967	CfaAffx.7541.1.S1_s_at	0.526799	3.9955
35193	CfaAffx.28600.1.S1_at	0.526555	5.25456
41941	CfaAffx.8728.1.S1_at	0.526254	4.70016
29968	CfaAffx.22126.1.S1_s_at	0.526106	3.16111
19583	Cfa.9527.1.A1_a_at	0.526031	6.53634
12297	Cfa.2895.1.S1_at	0.525947	9.07997
27877	CfaAffx.19586.1.S1_at	0.525433	3.83089
6721	Cfa.16160.1.S1_at	0.52533	4.77951
437	Cfa.10328.1.A1_s_at	0.524892	5.31984
20700	CfaAffx.10834.1.S1_at	0.523358	5.84303
4632	Cfa.14062.1.A1_s_at	0.523148	4.36036
31299	CfaAffx.23845.1.S1_s_at	0.523112	4.29196
216	Cfa.10112.1.A1_s_at	0.522656	8.05799
23699	CfaAffx.1449.1.S1_at	0.522578	3.02337
7707	Cfa.17424.1.S1_s_at	0.522137	3.21648
22691	CfaAffx.13209.1.S1_s_at	0.521937	7.85726
26002	CfaAffx.17290.1.S1_s_at	0.521826	4.25651
14676	Cfa.5201.1.A1_at	0.521803	4.59028
10767	Cfa.20837.2.S1_a_at	0.521761	3.90067
10321	Cfa.20252.1.S1_at	0.521628	10.0498
41252	CfaAffx.7912.1.S1_at	0.520835	3.13699
4120	Cfa.13588.1.A1_at	0.520611	4.55398
11106	Cfa.21169.1.S1_s_at	0.520604	3.70315
19369	Cfa.9329.1.A1_at	0.519935	6.30196
39105	CfaAffx.5233.1.S1_s_at	0.519691	6.48986
29087	CfaAffx.21027.1.S1_at	0.519619	4.79682
36924	CfaAffx.30792.1.S1_s_at	0.519256	3.06619
749	Cfa.10597.1.A1_at	0.519206	6.39312
27517	CfaAffx.19131.1.S1_s_at	0.519019	3.60616
7689	Cfa.17405.1.S1_s_at	0.518229	6.83625
12575	Cfa.3166.1.S1_at	0.518	3.71763
38097	CfaAffx.3956.1.S1_at	0.517934	6.26168
31743	CfaAffx.24390.1.S1_at	0.517559	5.38791
10974	Cfa.2103.2.A1_at	0.517339	4.00258
20834	CfaAffx.1098.1.S1_at	0.517138	3.81513
21639	CfaAffx.11983.1.S1_at	0.516605	4.44157
22214	CfaAffx.12675.1.S1_at	0.516209	9.75698
31674	CfaAffx.24305.1.S1_s_at	0.516138	5.23103
17031	Cfa.7281.1.A1_at	0.516079	2.53303
12554	Cfa.3146.1.A1_at	0.515989	4.17615
36138	CfaAffx.29776.1.S1_at	0.515946	4.92399
13706	Cfa.4340.1.S1_at	0.515882	5.63155
12955	Cfa.3549.2.A1_s_at	0.515467	2.50335
35422	CfaAffx.28912.1.S1_s_at	0.515187	4.77857
21770	CfaAffx.12145.1.S1_s_at	0.515187	4.75614
20414	CfaAffx.10454.1.S1_at	0.515175	5.71768
10682	Cfa.20743.1.S1_at	0.514817	4.87661
42377	CfaAffx.9252.1.S1_at	0.514567	4.75565
29219	CfaAffx.2120.1.S1_s_at	0.514386	3.76998
39166	CfaAffx.5322.1.S1_s_at	0.514136	3.8537
9389	Cfa.19342.2.A1_s_at	0.513795	6.85864
12275	Cfa.2878.1.A1_s_at	0.513494	8.49714
25996	CfaAffx.17282.1.S1_at	0.513373	3.35145
40200	CfaAffx.6627.1.S1_at	0.513294	3.53145
8857	Cfa.18714.1.S1_s_at	0.513267	5.40153
10250	Cfa.20183.1.S1_at	0.513226	5.66987
34420	CfaAffx.27660.1.S1_at	0.51309	3.95768
41928	CfaAffx.8713.1.S1_at	0.513052	2.5777
304	Cfa.10201.2.S1_at	0.512399	4.10489
2743	Cfa.12350.1.A1_at	0.512299	3.43818
26805	CfaAffx.18280.1.S1_s_at	0.512184	7.11851
18731	Cfa.871.2.S1_s_at	0.512129	4.67662
31932	CfaAffx.2464.1.S1_at	0.511792	4.62844
19913	Cfa.9880.1.A1_at	0.511564	3.79975
30610	CfaAffx.22957.1.S1_at	0.511382	5.4238
13471	Cfa.399.1.S1_at	0.511309	9.21428
8302	Cfa.18132.1.S1_at	0.511125	5.33491
32737	CfaAffx.25566.1.S1_s_at	0.510993	5.27553
27377	CfaAffx.18978.1.S1_at	0.510982	6.07361
38761	CfaAffx.4758.1.S1_s_at	0.510831	4.62832
22659	CfaAffx.13172.1.S1_s_at	0.510729	5.3149
28843	CfaAffx.20741.1.S1_s_at	0.510285	4.42926
26257	CfaAffx.17598.1.S1_s_at	0.509995	10.1736
22909	CfaAffx.13463.1.S1_at	0.509744	3.12762
38068	CfaAffx.3929.1.S1_at	0.509272	9.13207
12463	Cfa.3055.1.A1_at	0.509218	7.43353
41178	CfaAffx.7822.1.S1_s_at	0.508757	3.64857
39765	CfaAffx.6092.1.S1_at	0.508211	6.89166
29521	CfaAffx.21599.1.S1_s_at	0.508052	4.18729
36795	CfaAffx.30630.1.S1_at	0.507942	3.37126
40535	CfaAffx.7004.1.S1_s_at	0.507939	6.19253
4845	Cfa.14256.1.A1_at	0.507927	3.0344
40098	CfaAffx.6499.1.S1_at	0.507741	6.48587
1000	Cfa.10820.1.S1_at	0.507653	9.22306
7743	Cfa.17463.1.S1_s_at	0.507528	5.77226
19976	Cfa.9945.1.A1_at	0.507332	6.06978
41097	CfaAffx.7716.1.S1_at	0.507231	3.54122
10002	Cfa.19948.1.S1_s_at	0.507172	7.52412
34849	CfaAffx.28162.1.S1_at	0.506948	6.11925
31977	CfaAffx.2470.1.S1_s_at	0.505493	7.50767
213	Cfa.1011.1.S1_at	0.505432	5.57947
21633	CfaAffx.11973.1.S1_s_at	0.50541	3.91077
39254	CfaAffx.5446.1.S1_at	0.505252	4.92588
5729	Cfa.15073.1.A1_at	0.505204	8.30103
7266	Cfa.16864.1.S1_s_at	0.505199	2.95597
40039	CfaAffx.6417.1.S1_s_at	0.504682	3.78515
30526	CfaAffx.22836.1.S1_at	0.504663	5.72897
25118	CfaAffx.16213.1.S1_s_at	0.504496	6.66015
9993	Cfa.19941.1.S1_s_at	0.504427	5.57805
34443	CfaAffx.27687.1.S1_s_at	0.504423	3.54729
3170	Cfa.12703.1.A1_s_at	0.504225	4.053
40319	CfaAffx.6762.1.S1_s_at	0.504137	5.95104
441	Cfa.10332.1.S1_at	0.503876	6.96123
37350	CfaAffx.3132.1.S1_s_at	0.503698	6.24739
1411	Cfa.11204.1.A1_at	0.503342	2.41755
39066	CfaAffx.5177.1.S1_s_at	0.503253	4.70858
13720	Cfa.4359.1.S1_at	0.503029	2.98839
24424	CfaAffx.15357.1.S1_s_at	0.503025	2.54648
25991	CfaAffx.17277.1.S1_at	0.502506	3.82349
25515	CfaAffx.16711.1.S1_at	0.502366	5.40965
21724	CfaAffx.12087.1.S1_s_at	0.501545	7.28825
42395	CfaAffx.9269.1.S1_at	0.501513	3.07917
4724	Cfa.14147.1.A1_at	0.500706	2.84167
24317	CfaAffx.15230.1.S1_at	0.500603	5.13364
35838	CfaAffx.29406.1.S1_s_at	0.500332	3.584
7319	Cfa.16938.1.A1_at	0.500166	2.74103
23370	CfaAffx.14053.1.S1_at	0.499663	4.38761
40449	CfaAffx.6899.1.S1_s_at	0.499391	3.6499
23502	CfaAffx.14226.1.S1_s_at	0.499371	8.59792
8576	Cfa.18420.1.S1_s_at	0.499252	3.40946
9524	Cfa.19480.1.S1_s_at	0.499082	2.9647
28891	CfaAffx.20794.1.S1_at	0.49856	3.81947
234	Cfa.10132.1.A1_at	0.497958	7.43635
949	Cfa.10774.1.A1_at	0.497789	9.72889
36324	CfaAffx.29998.1.S1_s_at	0.497742	3.99194
27025	CfaAffx.18548.1.S1_s_at	0.497615	2.90519
18928	Cfa.8877.3.A1_s_at	0.497037	4.58022
15886	Cfa.6289.1.A1_at	0.496598	4.41012
24323	CfaAffx.15238.1.S1_at	0.496541	3.28483
21551	CfaAffx.11891.1.S1_at	0.496466	4.12934
19498	Cfa.9446.1.A1_s_at	0.495423	6.50034
29732	CfaAffx.21846.1.S1_at	0.495195	6.85099
38656	CfaAffx.4632.1.S1_at	0.495171	3.5354
35625	CfaAffx.2917.1.S1_s_at	0.494309	3.88929
10013	Cfa.19956.1.S1_s_at	0.493984	5.45123
22973	CfaAffx.1355.1.S1_at	0.493956	3.65615
13624	Cfa.4235.1.A1_at	0.493647	5.9546
33595	CfaAffx.26620.1.S1_at	0.493052	7.69708
30683	CfaAffx.23035.1.S1_s_at	0.492745	3.40984
21781	CfaAffx.12157.1.S1_s_at	0.492601	6.08632
36812	CfaAffx.30647.1.S1_at	0.492566	3.23252
24295	CfaAffx.1521.1.S1_s_at	0.492502	5.78903
14045	Cfa.4643.1.A1_at	0.492219	4.23056
35515	CfaAffx.29036.1.S1_at	0.491989	7.1216
28666	CfaAffx.20529.1.S1_at	0.490864	7.87948
36218	CfaAffx.29870.1.S1_at	0.490725	4.63898
20489	CfaAffx.10545.1.S1_s_at	0.490236	3.23969
10276	Cfa.20205.1.S1_s_at	0.489803	6.739
21789	CfaAffx.12169.1.S1_at	0.489467	5.03847
26197	CfaAffx.17516.1.S1_s_at	0.489357	4.94242
40337	CfaAffx.6782.1.S1_at	0.489329	2.6486
24735	CfaAffx.1574.1.S1_s_at	0.489292	4.08589
37742	CfaAffx.3513.1.S1_at	0.488937	2.41441
23320	CfaAffx.13993.1.S1_at	0.488848	3.09965
20082	CfaAffx.10071.1.S1_s_at	0.488474	4.83237
36806	CfaAffx.30639.1.S1_s_at	0.488363	6.66807
38938	CfaAffx.5005.1.S1_at	0.488327	3.49749
42032	CfaAffx.8840.1.S1_at	0.488151	2.58452
7465	Cfa.17134.1.S1_at	0.488003	4.2621
11396	Cfa.21541.1.S1_s_at	0.487709	5.03137
23622	CfaAffx.14381.1.S1_at	0.487465	3.92612
32606	CfaAffx.25417.1.S1_s_at	0.487446	4.26482
25901	CfaAffx.17169.1.S1_at	0.487326	4.57427
18082	Cfa.818.1.A1_s_at	0.48725	8.28726
8581	Cfa.18425.1.S1_s_at	0.487006	4.56277
18230	Cfa.831.1.A1_at	0.486506	2.99025
15348	Cfa.5799.1.A1_at	0.486478	3.54217
24533	CfaAffx.1549.1.S1_at	0.486356	4.72611
19331	Cfa.9287.1.A1_at	0.486254	7.38422
10258	Cfa.20191.1.S1_s_at	0.486123	9.12195
24981	CfaAffx.16036.1.S1_s_at	0.485592	3.3807
8415	Cfa.18236.1.S1_s_at	0.485323	5.44897
22072	CfaAffx.12508.1.S1_x_at	0.485304	2.81822
24185	CfaAffx.15073.1.S1_at	0.48518	5.77061
38575	CfaAffx.4542.1.S1_s_at	0.485162	3.89626
8811	Cfa.18670.1.S1_s_at	0.484896	3.70149
34527	CfaAffx.27790.1.S1_at	0.484473	2.80493
32536	CfaAffx.25338.1.S1_at	0.484383	4.29644
30717	CfaAffx.23085.1.S1_at	0.484249	3.14909
16308	Cfa.6663.1.A1_at	0.483756	6.91773
33527	CfaAffx.26540.1.S1_at	0.483537	4.3679
34652	CfaAffx.27938.1.S1_s_at	0.483534	4.79555
5947	Cfa.15257.1.A1_s_at	0.483101	5.88551
1060	Cfa.10871.1.A1_s_at	0.483079	9.26806
42714	CfaAffx.9657.1.S1_s_at	0.483026	4.60527
28745	CfaAffx.20641.1.S1_s_at	0.483002	6.44614
26855	CfaAffx.18338.1.S1_at	0.482918	3.02221
37521	CfaAffx.3251.1.S1_s_at	0.48283	2.9411
42118	CfaAffx.8928.1.S1_s_at	0.482565	3.33932
3241	Cfa.12769.1.A1_at	0.482506	2.45827
18743	Cfa.8720.1.A1_at	0.482135	5.41828
41219	CfaAffx.787.1.S1_at	0.482074	2.4779
16233	Cfa.660.3.S1_s_at	0.48202	7.32331
19346	Cfa.9305.1.A1_at	0.481956	4.34527
6836	Cfa.16304.1.A1_at	0.481534	6.29142
11351	Cfa.21493.1.S1_at	0.481307	9.01361
41576	CfaAffx.8284.1.S1_at	0.481305	4.91305
28766	CfaAffx.20667.1.S1_s_at	0.480761	4.591
9196	Cfa.19095.1.S1_s_at	0.480606	4.8779
25696	CfaAffx.1692.1.S1_s_at	0.480342	4.22334
21787	CfaAffx.12165.1.S1_s_at	0.480341	4.63593
16798	Cfa.7073.3.A1_a_at	0.479832	2.88465
40929	CfaAffx.7486.1.S1_s_at	0.479819	4.94866
31522	CfaAffx.24113.1.S1_s_at	0.479724	5.24207
10097	Cfa.20036.1.S1_s_at	0.47964	5.5368
31460	CfaAffx.24038.1.S1_s_at	0.4796	2.70452
12704	Cfa.33.2.S1_s_at	0.479467	8.92742
5724	Cfa.15070.1.A1_at	0.479386	5.032
26409	CfaAffx.17776.1.S1_s_at	0.479206	6.79391
11118	Cfa.21178.2.S1_at	0.479101	3.00315
10928	Cfa.2099.1.A1_s_at	0.478654	3.92254
21062	CfaAffx.11247.1.S1_at	0.477922	5.37719
40561	CfaAffx.7034.1.S1_at	0.477844	2.58264
41401	CfaAffx.8071.1.S1_at	0.477547	5.61533
9527	Cfa.19484.1.S1_at	0.477512	2.69208
9862	Cfa.19800.1.S1_s_at	0.477375	8.38412
2826	Cfa.1241.1.S1_s_at	0.477316	8.65875
9429	Cfa.19392.1.S1_at	0.477196	4.00908
11073	Cfa.21139.1.S1_s_at	0.476584	4.41804
9235	Cfa.19135.1.S1_at	0.476539	7.43797
33362	CfaAffx.26344.1.S1_at	0.476387	4.94346
6582	Cfa.15878.2.S1_s_at	0.476021	2.72909
10087	Cfa.20025.1.S1_s_at	0.475257	5.27914
23477	CfaAffx.14194.1.S1_s_at	0.474865	8.30568
41233	CfaAffx.789.1.S1_at	0.474682	5.34294
12384	Cfa.298.1.S1_a_at	0.47452	3.34335
22494	CfaAffx.13000.1.S1_s_at	0.474278	2.73779
8814	Cfa.18673.1.S1_s_at	0.473776	4.50292
2849	Cfa.1243.1.A1_at	0.473726	8.67216
6040	Cfa.15351.1.A1_s_at	0.473492	7.25803
36831	CfaAffx.30667.1.S1_s_at	0.473455	3.17091
1253	Cfa.11052.1.A1_at	0.473391	3.21198
10640	Cfa.20699.1.S1_s_at	0.473346	6.70453
11560	Cfa.2235.1.S1_at	0.473292	6.52627
40221	CfaAffx.6650.1.S1_s_at	0.473036	4.55193
20389	CfaAffx.1043.1.S1_s_at	0.47211	2.53999
13920	Cfa.454.1.A1_at	0.471537	5.47239
16186	Cfa.6562.1.A1_at	0.471321	2.5738
8990	Cfa.18860.1.S1_at	0.470928	3.44758
5806	Cfa.1514.1.S1_s_at	0.470889	4.34709
24796	CfaAffx.15816.1.S1_s_at	0.470687	4.55613
30108	CfaAffx.22305.1.S1_s_at	0.4706	3.81001
24189	CfaAffx.15082.1.S1_at	0.470133	4.64345
8996	Cfa.1887.1.A1_at	0.47003	6.26397
34064	CfaAffx.27215.1.S1_at	0.469979	7.53473
6468	Cfa.15736.1.A1_at	0.469843	6.14084
5628	Cfa.14988.2.S1_at	0.469655	8.18088
15043	Cfa.5517.2.A1_at	0.469423	3.77614
27801	CfaAffx.1950.1.S1_s_at	0.469204	4.66756
9814	Cfa.19756.1.S1_at	0.46865	3.96131
27896	CfaAffx.19612.1.S1_at	0.468556	6.18405
20680	CfaAffx.10803.1.S1_at	0.468442	4.15187
41987	CfaAffx.8782.1.S1_s_at	0.467927	4.82571
6290	Cfa.15583.1.A1_at	0.467883	2.47922
8743	Cfa.18602.1.S1_at	0.467835	4.68912
9505	Cfa.19464.1.S1_s_at	0.467769	7.32906
19471	Cfa.942.1.S1_at	0.467359	8.85712
26487	CfaAffx.17879.1.S1_s_at	0.467074	6.2618
9857	Cfa.19797.1.A1_at	0.466741	2.7319
39713	CfaAffx.6012.1.S1_at	0.466688	3.02144
8892	Cfa.18750.1.S1_s_at	0.466534	8.65321
9133	Cfa.19013.1.S1_s_at	0.466401	4.20694
35939	CfaAffx.2954.1.S1_at	0.466333	5.6079
3127	Cfa.12665.1.A1_at	0.466306	2.44996
10790	Cfa.20857.1.S1_s_at	0.466279	5.02619
35398	CfaAffx.28876.1.S1_at	0.466261	6.76355
27314	CfaAffx.18897.1.S1_s_at	0.466249	3.23676
30679	CfaAffx.23032.1.S1_at	0.46602	2.47485
4798	Cfa.14215.1.S1_s_at	0.465949	4.39632
37122	CfaAffx.3103.1.S1_at	0.465854	3.99797
39777	CfaAffx.6109.1.S1_s_at	0.465834	6.5273
30031	CfaAffx.2222.1.S1_at	0.465344	2.73694
33285	CfaAffx.26251.1.S1_at	0.465331	2.51747
1193	Cfa.10992.1.A1_at	0.465263	5.06064
40157	CfaAffx.6570.1.S1_at	0.465137	5.38483
11590	Cfa.2263.1.A1_at	0.464995	8.03305
36060	CfaAffx.29685.1.S1_s_at	0.464898	2.64717
10869	Cfa.20934.1.S1_at	0.464817	4.44935
19885	Cfa.9852.1.A1_at	0.464807	5.07421
1321	Cfa.11117.1.A1_at	0.464731	5.80779
4418	Cfa.13863.1.A1_s_at	0.464347	3.20856
10811	Cfa.20884.1.S1_s_at	0.464335	6.80712
8607	Cfa.18452.1.S1_s_at	0.46377	2.45345
11270	Cfa.2136.1.A1_at	0.463726	3.31708
19954	Cfa.9921.1.A1_at	0.463142	4.39437
38506	CfaAffx.4447.1.S1_s_at	0.463057	3.77581
14400	Cfa.4951.1.A1_at	0.462939	9.03917
42020	CfaAffx.8829.1.S1_s_at	0.462495	7.39213
12386	Cfa.298.1.S1_x_at	0.46234	3.33461
28717	CfaAffx.20602.1.S1_s_at	0.462144	6.65359
5053	Cfa.1446.1.A1_at	0.461764	6.42229
10125	Cfa.20063.1.S1_s_at	0.461515	8.55565
22046	CfaAffx.12473.1.S1_at	0.461401	4.81933
38573	CfaAffx.4538.1.S1_at	0.461384	5.73472
19172	Cfa.9123.1.S1_at	0.461044	4.70285
34871	CfaAffx.28184.1.S1_at	0.460882	6.22233
20833	CfaAffx.10977.1.S1_at	0.460731	5.94236
31651	CfaAffx.24279.1.S1_s_at	0.460267	4.24968
1327	Cfa.11121.3.S1_s_at	0.460155	11.1505
15851	Cfa.626.1.S1_at	0.459917	7.67995
16670	Cfa.6967.1.A1_at	0.459903	2.9418
41015	CfaAffx.7597.1.S1_at	0.459766	3.69711
8443	Cfa.1827.1.S1_at	0.459474	3.25069
21806	CfaAffx.12196.1.S1_s_at	0.459427	6.99466
23423	CfaAffx.1413.1.S1_s_at	0.459284	4.72935
7007	Cfa.1650.1.S1_at	0.459209	6.19283
2316	Cfa.11994.1.A1_at	0.459177	4.23034
7945	Cfa.17750.1.S1_s_at	0.459003	6.43112
39236	CfaAffx.5414.1.S1_s_at	0.45896	6.05278
7757	Cfa.17537.1.S1_s_at	0.458837	3.54735
23945	CfaAffx.14795.1.S1_at	0.458775	3.69549
20942	CfaAffx.11105.1.S1_s_at	0.458766	3.0277
31586	CfaAffx.24198.1.S1_at	0.458626	4.08224
5752	Cfa.1509.3.A1_s_at	0.458575	6.72324
6205	Cfa.15505.1.A1_at	0.458549	4.70054
26965	CfaAffx.18471.1.S1_at	0.458376	6.7833
7038	Cfa.16551.1.S1_s_at	0.458355	8.22056
7585	Cfa.17283.1.S1_at	0.458337	3.19342
42804	CfaAffx.9771.1.S1_s_at	0.458202	3.04918
516	Cfa.10400.1.A1_at	0.457921	5.10938
40872	CfaAffx.7418.1.S1_s_at	0.457507	5.87325
40560	CfaAffx.7033.1.S1_s_at	0.457281	2.53398
33735	CfaAffx.26792.1.S1_at	0.457186	3.05559
31226	CfaAffx.23752.1.S1_s_at	0.457053	7.71947
1039	Cfa.10853.1.A1_at	0.45694	7.43907
36947	CfaAffx.30820.1.S1_s_at	0.456562	6.13984
6985	Cfa.1646.1.A1_at	0.456226	8.566
34803	CfaAffx.28106.1.S1_at	0.45607	5.60574
29839	CfaAffx.21982.1.S1_at	0.45597	4.49124
17774	Cfa.7924.1.A1_s_at	0.455914	7.88168
15565	Cfa.5994.2.S1_at	0.455879	3.6785
13445	Cfa.3961.1.A1_at	0.455831	3.94785
30678	CfaAffx.23031.1.S1_s_at	0.455585	2.88971
30749	CfaAffx.23129.1.S1_at	0.455465	8.58637
39768	CfaAffx.6095.1.S1_at	0.455446	5.60057
8086	Cfa.17885.1.S1_s_at	0.454938	6.40305
184	Cfa.1008.1.A1_s_at	0.454928	8.80156
12848	Cfa.3456.1.S1_s_at	0.454881	3.44403
7844	Cfa.1763.1.S1_at	0.454728	6.52948
9872	Cfa.19814.1.S1_s_at	0.454495	4.0881
16043	Cfa.6428.1.A1_s_at	0.45427	6.63523
10538	Cfa.20541.1.S1_s_at	0.454186	9.96617
7327	Cfa.16949.2.S1_at	0.453992	4.15733
25369	CfaAffx.16526.1.S1_at	0.453311	5.09688
29662	CfaAffx.21765.1.S1_at	0.453233	2.90746
6909	Cfa.16375.1.S1_at	0.453071	8.57872
25484	CfaAffx.16679.1.S1_at	0.453016	2.968
26492	CfaAffx.17884.1.S1_s_at	0.452972	8.5372
12350	Cfa.2947.1.S1_at	0.452651	5.5844
2011	Cfa.1174.1.S1_at	0.452646	10.9735
23040	CfaAffx.13627.1.S1_s_at	0.452533	4.96965
15841	Cfa.625.1.S1_at	0.452486	3.18204
9897	Cfa.19837.1.S1_s_at	0.452463	4.04821
8588	Cfa.18432.1.S1_s_at	0.452219	5.94676
29446	CfaAffx.21495.1.S1_x_at	0.451924	7.0723
40341	CfaAffx.6785.1.S1_s_at	0.451834	7.64072
19405	Cfa.936.1.S1_at	0.451411	9.3101
21819	CfaAffx.12208.1.S1_at	0.451289	4.55075
26667	CfaAffx.18108.1.S1_at	0.451274	3.75637
1798	Cfa.1155.1.S1_at	0.451186	7.84913
11304	Cfa.21397.1.S1_s_at	0.451184	3.77677
8702	Cfa.18562.1.S1_s_at	0.450043	4.55859
8515	Cfa.18355.1.S1_s_at	0.449955	5.79746
31887	CfaAffx.24586.1.S1_at	0.449659	5.23208
37693	CfaAffx.3457.1.S1_at	0.449626	5.05385
13398	Cfa.3911.1.S1_s_at	0.449566	3.92974
24984	CfaAffx.1604.1.S1_s_at	0.449442	4.30357
33367	CfaAffx.26347.1.S1_at	0.449313	2.83548
38958	CfaAffx.5046.1.S1_x_at	0.449273	3.65447
20708	CfaAffx.10841.1.S1_s_at	0.448799	11.0379
13562	Cfa.4123.1.A1_at	0.448564	2.5685
9892	Cfa.19833.1.S1_s_at	0.44842	3.65461
20910	CfaAffx.11065.1.S1_s_at	0.448338	5.32479
34933	CfaAffx.28267.1.S1_s_at	0.448256	5.46322
35289	CfaAffx.28733.1.S1_s_at	0.447983	2.64364
10022	Cfa.19964.1.S1_s_at	0.447789	3.17991
30153	CfaAffx.22358.1.S1_at	0.447745	2.41891
9283	Cfa.19170.1.S1_at	0.447648	2.40843
1506	Cfa.1129.1.S1_s_at	0.447591	8.1905
9155	Cfa.19032.1.S1_at	0.447376	5.19609
7819	Cfa.17603.1.S1_s_at	0.447137	4.5777
32329	CfaAffx.25091.1.S1_s_at	0.446829	5.03923
35473	CfaAffx.28983.1.S1_at	0.446717	5.58153
30522	CfaAffx.22827.1.S1_at	0.446405	6.2065
22881	CfaAffx.13421.1.S1_at	0.445852	3.96095
8744	Cfa.18602.2.S1_s_at	0.445563	5.1564
17544	Cfa.7720.1.A1_at	0.445536	2.86702
26678	CfaAffx.18120.1.S1_at	0.444779	4.17989
10306	Cfa.20239.1.S1_s_at	0.444722	3.41006
40340	CfaAffx.6785.1.S1_at	0.444683	8.57228
37634	CfaAffx.3383.1.S1_at	0.444456	2.79515
13957	Cfa.457.1.S1_s_at	0.444141	6.43392
33082	CfaAffx.25997.1.S1_s_at	0.443884	6.53348
36666	CfaAffx.30460.1.S1_s_at	0.443759	5.56062
14529	Cfa.507.1.A1_s_at	0.443504	8.19644
33019	CfaAffx.25914.1.S1_s_at	0.443474	2.40397
38134	CfaAffx.4010.1.S1_s_at	0.443443	3.12872
31983	CfaAffx.24708.1.S1_at	0.442991	3.61974
21310	CfaAffx.11587.1.S1_at	0.442572	6.07137
3664	Cfa.1316.1.S1_at	0.442553	9.50182
22888	CfaAffx.13431.1.S1_s_at	0.442207	9.04809
40979	CfaAffx.756.1.S1_s_at	0.4422	5.48425
42839	CfaAffx.9819.1.S1_s_at	0.442068	5.44063
10817	Cfa.20889.1.S1_at	0.441794	9.85985
6283	Cfa.15578.1.A1_at	0.441006	7.88213
5860	Cfa.15185.1.A1_s_at	0.440966	6.74402
12475	Cfa.3066.1.S1_s_at	0.440639	6.72117
40868	CfaAffx.7415.1.S1_at	0.440354	5.45503
18408	Cfa.845.1.A1_s_at	0.440293	5.30747
12009	Cfa.2639.1.A1_at	0.440263	4.02048
26538	CfaAffx.1795.1.S1_at	0.440017	3.56234
5805	Cfa.1514.1.S1_at	0.440005	6.15329
22579	CfaAffx.13089.1.S1_s_at	0.439877	6.85444
10027	Cfa.19971.1.S1_at	0.439778	2.54535
3387	Cfa.12899.1.A1_at	0.43967	6.65502
23537	CfaAffx.1427.1.S1_s_at	0.439659	7.56786
14294	Cfa.4856.1.A1_at	0.439615	3.1169
8712	Cfa.18571.1.S1_s_at	0.439481	3.7215
31397	CfaAffx.23968.1.S1_s_at	0.43928	10.6123
214	Cfa.1011.1.S1_s_at	0.439103	10.4426
6886	Cfa.16353.1.S1_at	0.439098	3.95554
22460	CfaAffx.12960.1.S1_at	0.439021	5.46579
35341	CfaAffx.28791.1.S1_at	0.438667	3.64151
27991	CfaAffx.19725.1.S1_s_at	0.438645	7.91922
34580	CfaAffx.27861.1.S1_at	0.438537	3.45158
5190	Cfa.14584.1.A1_s_at	0.438464	4.43971
10613	Cfa.20664.1.S1_s_at	0.438456	4.11164
26362	CfaAffx.17717.1.S1_at	0.437804	4.88456
2549	Cfa.12195.13.A1_s_at	0.437753	5.06535
33343	CfaAffx.26314.1.S1_s_at	0.437624	4.61446
32308	CfaAffx.25068.1.S1_at	0.436892	4.38732
1864	Cfa.1161.1.S1_at	0.436542	7.49805
35606	CfaAffx.29143.1.S1_s_at	0.436179	6.11278
38056	CfaAffx.3918.1.S1_at	0.435877	4.06315
36956	CfaAffx.30837.1.S1_s_at	0.43575	4.46589
9799	Cfa.19742.1.S1_at	0.435636	4.40284
28109	CfaAffx.19874.1.S1_at	0.435612	2.88715
7683	Cfa.1740.1.S1_at	0.435548	10.0362
747	Cfa.10595.1.A1_at	0.435484	2.51641
2147	Cfa.11853.1.A1_at	0.435412	3.98958
13434	Cfa.3952.1.S1_at	0.43528	6.84579
25958	CfaAffx.17237.1.S1_x_at	0.435096	5.54858
36574	CfaAffx.30336.1.S1_at	0.43501	5.46231
461	Cfa.10351.1.A1_a_at	0.434966	5.30432
26751	CfaAffx.18209.1.S1_s_at	0.434875	2.8763
24017	CfaAffx.1487.1.S1_at	0.434486	4.61578
30955	CfaAffx.23392.1.S1_x_at	0.434472	2.46926
33826	CfaAffx.26915.1.S1_s_at	0.434265	5.44687
3022	Cfa.12581.1.A1_at	0.433993	3.83483
14149	Cfa.473.1.A1_at	0.433865	5.6869
20695	CfaAffx.10823.1.S1_at	0.433665	2.75777
27457	CfaAffx.19067.1.S1_s_at	0.433217	3.14252
20522	CfaAffx.10591.1.S1_at	0.433041	7.30035
40592	CfaAffx.7065.1.S1_s_at	0.432761	5.55702
11712	Cfa.2365.1.A1_at	0.432332	4.27842
4507	Cfa.13951.1.A1_at	0.432223	2.77159
11911	Cfa.2547.1.S1_at	0.432207	6.05118
1221	Cfa.11020.1.A1_at	0.432161	10.7966
19782	Cfa.9738.1.S1_s_at	0.432153	7.89322
724	Cfa.10576.1.A1_at	0.431855	8.48364
30625	CfaAffx.22977.1.S1_at	0.431829	3.61716
35372	CfaAffx.28830.1.S1_at	0.4318	4.43707
38335	CfaAffx.4243.1.S1_at	0.431753	2.57651
19275	Cfa.9228.1.A1_at	0.43175	7.13309
20387	CfaAffx.10427.1.S1_at	0.431254	2.58073
19288	Cfa.924.1.A1_at	0.431184	4.83729
22576	CfaAffx.13085.1.S1_at	0.431071	7.5145
11901	Cfa.2536.1.A1_s_at	0.430875	7.17603
18796	Cfa.8764.1.A1_s_at	0.430787	2.49447
12418	Cfa.3008.1.A1_at	0.430294	7.17895
11388	Cfa.21533.1.S1_s_at	0.430138	3.67431
4092	Cfa.13564.1.A1_at	0.4301	5.44858
36942	CfaAffx.30814.1.S1_at	0.430043	8.46888
27992	CfaAffx.19726.1.S1_s_at	0.429802	4.2842
24336	CfaAffx.15255.1.S1_s_at	0.429723	3.69617
38284	CfaAffx.4176.1.S1_at	0.429583	6.86634
14630	Cfa.516.2.A1_at	0.429407	2.82107
34751	CfaAffx.28047.1.S1_s_at	0.429313	6.37132
24262	CfaAffx.15175.1.S1_at	0.428921	5.34224
28979	CfaAffx.2090.1.S1_at	0.428785	4.7748
21472	CfaAffx.11797.1.S1_at	0.428716	4.26065
37726	CfaAffx.3498.1.S1_at	0.428676	4.12962
34074	CfaAffx.2723.1.S1_s_at	0.428533	4.87266
22931	CfaAffx.13490.1.S1_at	0.428474	5.45833
7613	Cfa.17314.1.S1_at	0.428405	5.37683
15708	Cfa.6132.1.A1_at	0.428252	6.3535
8803	Cfa.18663.1.S1_s_at	0.428235	7.97647
6571	Cfa.1585.2.S1_s_at	0.428148	6.76643
41539	CfaAffx.8244.1.S1_s_at	0.428012	4.75192
21112	CfaAffx.11304.1.S1_at	0.426951	4.82519
6327	Cfa.15614.1.S1_s_at	0.426911	5.47035
12144	Cfa.2755.1.A1_at	0.426826	8.55004
27120	CfaAffx.18658.1.S1_at	0.426267	4.60389
38112	CfaAffx.3979.1.S1_at	0.425976	7.06804
6013	Cfa.15323.1.S1_at	0.425481	3.27688
21872	CfaAffx.12261.1.S1_at	0.42537	8.08653
29440	CfaAffx.21482.1.S1_s_at	0.425302	4.25593
18535	Cfa.8552.1.A1_s_at	0.425151	5.05997
37853	CfaAffx.3659.1.S1_s_at	0.425118	2.8799
8737	Cfa.18596.2.S1_s_at	0.424874	5.20814
7795	Cfa.17580.1.S1_s_at	0.424808	8.1915
10630	Cfa.20684.1.S1_s_at	0.424535	5.54112
26057	CfaAffx.1736.1.S1_at	0.424486	3.14606
38272	CfaAffx.4161.1.S1_s_at	0.424298	6.95199
11847	Cfa.2490.1.A1_s_at	0.424226	9.9703
5632	Cfa.14989.2.A1_at	0.42401	4.21398
22051	CfaAffx.12483.1.S1_at	0.423725	2.47842
34049	CfaAffx.27191.1.S1_s_at	0.423701	4.23262
3396	Cfa.12905.1.A1_a_at	0.423577	7.17845
41180	CfaAffx.7824.1.S1_at	0.42331	4.61309
23348	CfaAffx.14021.1.S1_at	0.423129	3.81639
12769	Cfa.3371.1.S1_s_at	0.422848	8.47127
22052	CfaAffx.12483.1.S1_s_at	0.422684	2.56822
370	Cfa.10268.1.A1_at	0.422636	8.44756
30972	CfaAffx.2341.1.S1_s_at	0.422621	3.45199
40275	CfaAffx.6715.1.S1_at	0.422448	4.20887
33827	CfaAffx.26916.1.S1_at	0.422169	3.38039
40265	CfaAffx.6707.1.S1_at	0.421944	2.74139
2475	Cfa.12122.1.A1_s_at	0.421841	3.52689
34790	CfaAffx.28094.1.S1_s_at	0.421743	3.83101
8236	Cfa.1804.1.S1_at	0.421422	7.55687
23406	CfaAffx.14109.1.S1_s_at	0.421266	3.24213
25403	CfaAffx.1657.1.S1_at	0.421212	6.18631
40160	CfaAffx.6578.1.S1_at	0.421162	4.71776
39499	CfaAffx.5751.1.S1_at	0.420888	7.756
5417	Cfa.14799.1.A1_at	0.420863	2.45423
40866	CfaAffx.7412.1.S1_at	0.42072	2.87228
9359	Cfa.19285.1.S1_at	0.420688	6.84834
36152	CfaAffx.29793.1.S1_at	0.420555	2.49262
32674	CfaAffx.25498.1.S1_at	0.420316	5.05461
7926	Cfa.17730.1.S1_at	0.420236	5.05902
5803	Cfa.15137.1.A1_s_at	0.420128	3.2715
8230	Cfa.18032.1.S1_at	0.42008	5.94489
12782	Cfa.3387.1.S1_a_at	0.420074	9.44177
37060	CfaAffx.30951.1.S1_at	0.420026	6.32064
22619	CfaAffx.13134.1.S1_at	0.419821	5.5849
12616	Cfa.3208.1.A1_at	0.419799	5.93445
1266	Cfa.11066.1.A1_at	0.419701	5.38644
19478	Cfa.9426.1.S1_s_at	0.419662	8.00708
9473	Cfa.19433.1.S1_s_at	0.419583	4.78278
42324	CfaAffx.919.1.S1_s_at	0.419346	4.9976
23175	CfaAffx.13808.1.S1_at	0.419223	2.45234
28163	CfaAffx.1994.1.S1_s_at	0.419146	6.14777
35137	CfaAffx.28542.1.S1_s_at	0.419	3.27767
20530	CfaAffx.106.1.S1_x_at	0.418487	2.44403
12340	Cfa.2937.1.A1_at	0.418158	8.50905
30676	CfaAffx.2303.1.S1_at	0.417909	5.55175
21500	CfaAffx.11833.1.S1_at	0.41775	5.02889
28999	CfaAffx.20920.1.S1_s_at	0.417701	4.88171
20448	CfaAffx.10496.1.S1_s_at	0.417353	2.62126
10156	Cfa.20096.1.S1_s_at	0.417135	6.83525
9399	Cfa.19351.1.S1_at	0.417093	3.66162
18757	Cfa.8733.1.A1_s_at	0.417061	5.20457
6743	Cfa.16203.1.S1_at	0.417058	8.31532
29535	CfaAffx.21614.1.S1_s_at	0.416704	4.23097
41564	CfaAffx.827.1.S1_at	0.416238	3.16004
20555	CfaAffx.10633.1.S1_s_at	0.416056	7.60428
13703	Cfa.4338.1.S1_at	0.415582	8.71676
37378	CfaAffx.3167.1.S1_s_at	0.415547	4.60529
14513	Cfa.5055.1.A1_at	0.415327	2.80341
30074	CfaAffx.22271.1.S1_at	0.41511	5.32168
18325	Cfa.8383.1.A1_s_at	0.415046	3.48817
34718	CfaAffx.28011.1.S1_s_at	0.414964	4.47624
26778	CfaAffx.18248.1.S1_at	0.414948	3.82498
12026	Cfa.2654.1.A1_at	0.414892	4.25491
7969	Cfa.17772.1.S1_s_at	0.414773	4.01589
15900	Cfa.6300.1.A1_at	0.414642	8.38873
33339	CfaAffx.26309.1.S1_at	0.414599	3.01167
18625	Cfa.862.1.S1_s_at	0.41432	10.6269
1470	Cfa.11260.1.A1_at	0.414158	5.36729
7818	Cfa.17603.1.S1_at	0.414157	4.16836
30970	CfaAffx.23408.1.S1_s_at	0.414011	3.7892
24927	CfaAffx.15979.1.S1_at	0.413996	2.43002
2437	Cfa.12093.1.A1_at	0.413789	4.2803
17659	Cfa.7819.1.A1_at	0.413756	2.63037
34593	CfaAffx.27877.1.S1_s_at	0.413518	3.57313
33925	CfaAffx.27035.1.S1_at	0.413181	6.26598
880	Cfa.10711.1.A1_at	0.412968	8.41943
9940	Cfa.19879.1.S1_s_at	0.412737	3.41135
21395	CfaAffx.11700.1.S1_s_at	0.412659	4.61876
19708	Cfa.966.1.S1_s_at	0.412501	11.1014
4315	Cfa.13764.1.S1_s_at	0.412344	3.9394
11412	Cfa.21556.1.S1_s_at	0.412322	4.5838
33417	CfaAffx.26407.1.S1_at	0.412205	7.2014
23930	CfaAffx.1478.1.S1_at	0.412165	3.50652
29202	CfaAffx.21183.1.S1_at	0.412127	4.77373
11060	Cfa.21125.1.S1_s_at	0.412117	6.64273
23172	CfaAffx.13803.1.S1_at	0.412068	8.93236
8174	Cfa.17981.1.S1_s_at	0.412039	3.89766
14305	Cfa.4867.1.A1_at	0.411922	2.46684
40066	CfaAffx.6452.1.S1_s_at	0.411739	3.3707
23317	CfaAffx.13990.1.S1_s_at	0.41159	3.9716
9842	Cfa.19782.1.S1_at	0.411271	5.19478
31073	CfaAffx.23554.1.S1_x_at	0.411216	3.65294
12824	Cfa.3432.1.S1_at	0.410803	5.82311
19387	Cfa.9343.1.A1_at	0.410583	7.71581
20558	CfaAffx.10638.1.S1_at	0.410204	3.14643
4804	Cfa.14220.1.A1_at	0.410141	3.2692
7216	Cfa.16793.1.S1_at	0.40956	7.01963
9763	Cfa.19706.1.S1_at	0.409358	6.83036
13136	Cfa.3707.1.A1_at	0.409335	2.8744
39378	CfaAffx.5594.1.S1_at	0.409204	4.28927
19103	Cfa.9055.1.S1_at	0.409058	7.28625
40772	CfaAffx.7304.1.S1_at	0.408821	3.94623
25839	CfaAffx.17082.1.S1_s_at	0.407916	3.24703
10430	Cfa.20367.1.S1_at	0.407705	8.66978
1875	Cfa.11620.1.A1_s_at	0.40769	5.91152
1505	Cfa.1129.1.S1_at	0.407635	8.56431
21924	CfaAffx.12327.1.S1_at	0.407618	4.72457
37958	CfaAffx.3789.1.S1_s_at	0.407548	4.67022
9917	Cfa.19855.1.S1_s_at	0.407345	6.21144
9474	Cfa.19434.1.S1_s_at	0.407118	5.54204
33978	CfaAffx.27099.1.S1_at	0.40709	4.39331
37727	CfaAffx.3499.1.S1_at	0.407063	3.63366
36783	CfaAffx.30615.1.S1_at	0.406865	5.6301
9363	Cfa.19291.1.S1_at	0.406721	4.50952
35732	CfaAffx.29283.1.S1_at	0.406125	2.84706
4426	Cfa.13870.1.A1_at	0.406121	4.3773
42861	CfaAffx.9845.1.S1_s_at	0.405951	3.55561
37348	CfaAffx.313.1.S1_at	0.405576	7.16717
28525	CfaAffx.20368.1.S1_at	0.405385	6.04466
42598	CfaAffx.953.1.S1_s_at	0.405062	6.71481
27245	CfaAffx.18804.1.S1_s_at	0.404824	4.51727
27329	CfaAffx.18917.1.S1_s_at	0.404816	4.09313
10761	Cfa.20831.1.S1_s_at	0.404344	3.44848
22481	CfaAffx.12984.1.S1_s_at	0.404125	4.29196
15824	Cfa.6238.1.A1_at	0.403805	8.28473
31998	CfaAffx.24727.1.S1_s_at	0.403073	3.0086
22313	CfaAffx.12797.1.S1_s_at	0.402983	7.03669
12075	Cfa.270.2.A1_at	0.402935	7.55382
28769	CfaAffx.20669.1.S1_s_at	0.402829	2.85274
28219	CfaAffx.2001.1.S1_s_at	0.402651	8.66069
20232	CfaAffx.10249.1.S1_s_at	0.402425	3.83351
22709	CfaAffx.13225.1.S1_at	0.402118	4.79242
812	Cfa.10646.1.A1_at	0.402072	6.06161
20118	CfaAffx.10115.1.S1_s_at	0.402003	5.0459
35554	CfaAffx.2908.1.S1_at	0.401793	2.5275
9561	Cfa.19517.1.S1_s_at	0.401761	3.40132
21763	CfaAffx.12136.1.S1_s_at	0.401753	3.72038
23499	CfaAffx.14223.1.S1_at	0.401714	10.1601
20253	CfaAffx.1027.1.S1_at	0.401676	4.00679
38918	CfaAffx.4966.1.S1_s_at	0.401534	6.42119
11738	Cfa.2388.2.A1_at	0.401436	3.28501
23061	CfaAffx.13654.1.S1_s_at	0.401092	7.75264
17264	Cfa.7480.2.A1_at	0.401007	2.40289
360	Cfa.10254.1.A1_at	0.400957	5.10297
10809	Cfa.20881.1.S1_s_at	0.400929	5.32828
35270	CfaAffx.28711.1.S1_at	0.400918	6.32498
1410	Cfa.11202.1.S1_at	0.400882	3.30268
38034	CfaAffx.3889.1.S1_s_at	0.400704	3.45406
1457	Cfa.11250.1.A1_at	0.400673	7.34346
37716	CfaAffx.3486.1.S1_at	0.400667	5.88278
7958	Cfa.17761.1.S1_s_at	0.400525	4.13677
40583	CfaAffx.7056.1.S1_at	0.400353	2.65391
10703	Cfa.20764.1.S1_s_at	0.400317	4.18167
9251	Cfa.19148.1.S1_s_at	0.400279	7.01545
868	Cfa.10700.1.A1_s_at	0.400212	5.58407
14095	Cfa.468.2.A1_at	0.400081	4.91336
41225	CfaAffx.7879.1.S1_at	0.399904	3.54799
10256	Cfa.20190.1.A1_at	0.399246	6.4959
6509	Cfa.15776.1.A1_at	0.399224	4.61014
7861	Cfa.1765.1.A1_at	0.398769	11.3824
34390	CfaAffx.27617.1.S1_at	0.398729	3.71677
28071	CfaAffx.19831.1.S1_x_at	0.398603	9.09399
28223	CfaAffx.20016.1.S1_s_at	0.39837	6.89743
11546	Cfa.222.1.S1_s_at	0.398219	10.2156
8886	Cfa.18744.1.S1_at	0.398155	2.83007
41280	CfaAffx.7948.1.S1_at	0.398081	3.24515
35371	CfaAffx.28829.1.S1_at	0.398063	4.59718
9552	Cfa.19508.1.A1_at	0.398061	2.63543
38802	CfaAffx.4803.1.S1_at	0.397396	3.8872
23024	CfaAffx.13605.1.S1_s_at	0.39738	6.59008
27912	CfaAffx.19629.1.S1_s_at	0.397366	6.04825
20622	CfaAffx.10726.1.S1_at	0.39736	2.92367
22367	CfaAffx.12851.1.S1_at	0.397188	6.00126
36568	CfaAffx.30328.1.S1_at	0.397148	3.68164
26247	CfaAffx.17580.1.S1_s_at	0.397138	3.51302
36216	CfaAffx.29869.1.S1_s_at	0.397003	4.05898
6885	Cfa.16352.1.S1_at	0.396778	7.32573
3453	Cfa.12963.1.A1_at	0.396751	2.90008
39444	CfaAffx.5686.1.S1_s_at	0.396686	9.75628
11807	Cfa.2450.1.A1_at	0.396628	5.35435
28720	CfaAffx.2061.1.S1_s_at	0.396593	2.57314
38682	CfaAffx.4662.1.S1_s_at	0.396518	10.2275
6223	Cfa.15522.1.A1_at	0.3965	6.39697
36573	CfaAffx.30335.1.S1_at	0.396278	7.79972
41365	CfaAffx.8030.1.S1_at	0.396266	6.63332
19448	Cfa.9398.1.A1_at	0.395748	7.21439
41627	CfaAffx.8351.1.S1_s_at	0.395742	5.63646
25762	CfaAffx.16995.1.S1_at	0.39562	6.08412
2156	Cfa.1186.1.A1_s_at	0.394831	2.5528
39308	CfaAffx.5517.1.S1_at	0.394751	6.25036
796	Cfa.10636.1.S1_s_at	0.394601	5.77901
29265	CfaAffx.21268.1.S1_at	0.394425	3.41528
39000	CfaAffx.5089.1.S1_at	0.394234	4.81764
35018	CfaAffx.28375.1.S1_at	0.394176	2.85147
638	Cfa.10507.1.A1_at	0.393425	8.27544
23553	CfaAffx.14292.1.S1_s_at	0.393123	4.09479
20035	CfaAffx.10006.1.S1_at	0.393088	4.33538
30895	CfaAffx.23306.1.S1_at	0.392974	3.7754
1520	Cfa.113.1.S1_s_at	0.392904	4.96276
964	Cfa.10789.1.A1_s_at	0.392852	6.33589
39221	CfaAffx.5396.1.S1_s_at	0.392804	3.47899
11833	Cfa.2477.1.S1_at	0.39278	4.59084
19154	Cfa.9105.1.A1_s_at	0.392716	2.99155
20380	CfaAffx.10419.1.S1_s_at	0.392711	6.06189
19864	Cfa.9833.1.S1_at	0.392584	6.64591
27782	CfaAffx.19468.1.S1_s_at	0.392539	3.37524
8359	Cfa.18187.1.S1_at	0.39239	4.14805
10915	Cfa.2098.1.A1_at	0.392214	5.957
21134	CfaAffx.11343.1.S1_at	0.392149	5.82581
20366	CfaAffx.10401.1.S1_at	0.391831	7.76308
417	Cfa.10311.1.A1_at	0.391772	3.90109
25161	CfaAffx.16255.1.S1_s_at	0.391725	4.83773
33004	CfaAffx.25895.1.S1_at	0.391529	2.9771
35873	CfaAffx.29450.1.S1_s_at	0.391313	2.73693
12353	Cfa.2952.1.A1_at	0.391076	3.082
33588	CfaAffx.26607.1.S1_s_at	0.391009	4.74552
42532	CfaAffx.944.1.S1_x_at	0.390758	4.66519
9509	Cfa.19469.1.S1_s_at	0.390685	3.56421
11819	Cfa.2464.1.S1_at	0.390678	5.02031
497	Cfa.10384.1.S1_at	0.390531	9.72975
31788	CfaAffx.24438.1.S1_at	0.390507	2.43958
25108	CfaAffx.16202.1.S1_s_at	0.390452	5.67925
39387	CfaAffx.5605.1.S1_s_at	0.390425	3.12384
34252	CfaAffx.27443.1.S1_at	0.390265	6.26022
22060	CfaAffx.12494.1.S1_s_at	0.390191	6.38341
8843	Cfa.1870.1.S1_at	0.390037	6.89094
17571	Cfa.7741.1.A1_at	0.389936	2.72185
11475	Cfa.21629.1.S1_s_at	0.389899	5.41348
34923	CfaAffx.28256.1.S1_at	0.389884	3.72506
37605	CfaAffx.3351.1.S1_s_at	0.389799	3.46111
11721	Cfa.2372.1.S1_at	0.389628	6.78656
24274	CfaAffx.1519.1.S1_at	0.388658	2.53549
40620	CfaAffx.7103.1.S1_at	0.388646	5.52595
25043	CfaAffx.16115.1.S1_s_at	0.388628	6.37989
38859	CfaAffx.4891.1.S1_s_at	0.388623	3.38564
22190	CfaAffx.12648.1.S1_s_at	0.388555	8.23019
15746	Cfa.6171.1.A1_at	0.388299	5.19172
13929	Cfa.4545.1.S1_s_at	0.388164	3.10145
19015	Cfa.8966.1.A1_at	0.388109	3.24395
18947	Cfa.8896.1.S1_at	0.387949	12.1262
19074	Cfa.9026.1.A1_at	0.38787	3.76621
10477	Cfa.20442.2.S1_s_at	0.387627	4.87385
743	Cfa.10591.1.A1_at	0.387457	3.05572
40138	CfaAffx.6551.1.S1_at	0.387426	8.22054
12064	Cfa.2688.1.S1_s_at	0.38739	3.0261
10601	Cfa.20647.1.A1_s_at	0.387254	4.55458
8526	Cfa.18366.1.S1_s_at	0.386915	3.11126
7718	Cfa.17435.1.S1_s_at	0.386906	2.96226
26248	CfaAffx.17581.1.S1_at	0.386643	5.29755
11080	Cfa.21146.1.S1_s_at	0.386539	2.61831
10069	Cfa.20006.1.S1_s_at	0.386415	5.25652
23036	CfaAffx.13622.1.S1_at	0.386365	2.83039
10055	Cfa.19995.1.S1_at	0.386342	3.73408
1876	Cfa.11621.1.A1_s_at	0.386296	5.93238
8416	Cfa.18239.1.S1_s_at	0.385693	4.53937
30284	CfaAffx.22516.1.S1_s_at	0.38546	3.13092
39551	CfaAffx.5819.1.S1_at	0.385353	6.20282
34411	CfaAffx.27647.1.S1_at	0.38522	4.47151
39212	CfaAffx.5385.1.S1_at	0.385191	3.28805
14497	Cfa.504.1.S1_at	0.385112	7.31005
31099	CfaAffx.23580.1.S1_at	0.38488	3.77627
23978	CfaAffx.14830.1.S1_s_at	0.384837	3.27955
26804	CfaAffx.18280.1.S1_at	0.384049	6.90899
42902	CfaAffx.9908.1.S1_at	0.383836	5.29458
1202	Cfa.110.1.S1_s_at	0.383694	2.55522
9403	Cfa.19356.1.S1_s_at	0.383513	5.60851
42588	CfaAffx.9521.1.S1_s_at	0.383332	6.59186
1490	Cfa.11279.1.S1_s_at	0.383111	5.00762
37402	CfaAffx.3199.1.S1_at	0.383023	4.41333
40188	CfaAffx.6612.1.S1_at	0.382952	4.78218
17179	Cfa.7408.1.A1_at	0.382948	3.07897
23781	CfaAffx.14595.1.S1_s_at	0.382902	3.8871
9125	Cfa.19006.1.S1_s_at	0.382878	6.33305
17314	Cfa.7524.1.S1_s_at	0.382845	2.48235
20198	CfaAffx.10207.1.S1_s_at	0.382838	4.19342
15840	Cfa.6249.1.A1_at	0.382826	4.81746
21846	CfaAffx.12234.1.S1_s_at	0.382731	7.28538
3220	Cfa.12747.1.A1_s_at	0.382715	6.74255
29424	CfaAffx.21464.1.S1_at	0.382385	6.55081
12383	Cfa.2978.1.A1_at	0.382343	6.47192
40063	CfaAffx.6445.1.S1_at	0.382268	2.46481
37501	CfaAffx.3224.1.S1_s_at	0.382185	6.51188
42834	CfaAffx.9810.1.S1_at	0.382142	7.61821
40148	CfaAffx.6560.1.S1_at	0.382058	5.16636
8425	Cfa.18248.1.S1_s_at	0.38202	8.51583
8244	Cfa.18058.1.S1_at	0.381822	6.26886
37311	CfaAffx.31249.1.S1_at	0.38163	6.30213
16386	Cfa.673.2.S1_at	0.381583	2.68356
27970	CfaAffx.19701.1.S1_at	0.381561	7.25616
2598	Cfa.12228.1.A1_at	0.381332	4.10368
717	Cfa.10570.1.S1_at	0.381202	7.15705
25915	CfaAffx.17182.1.S1_s_at	0.38117	3.77304
9804	Cfa.19745.1.S1_at	0.38093	5.20727
37596	CfaAffx.3340.1.S1_s_at	0.380828	2.55828
21167	CfaAffx.11384.1.S1_at	0.380729	3.24461
29683	CfaAffx.21788.1.S1_s_at	0.38065	6.01891
32178	CfaAffx.24917.1.S1_at	0.380439	3.19274
10020	Cfa.19962.1.S1_at	0.380426	6.44145
33628	CfaAffx.26659.1.S1_s_at	0.380065	5.24814
28115	CfaAffx.19880.1.S1_s_at	0.380038	4.22257
9559	Cfa.19515.1.S1_at	0.379853	4.87929
19258	Cfa.9211.1.A1_at	0.37961	7.99239
4467	Cfa.13910.1.A1_at	0.379501	4.39193
42116	CfaAffx.8926.1.S1_at	0.379427	6.11178
11834	Cfa.2479.1.S1_at	0.378953	7.65951
21903	CfaAffx.12297.1.S1_at	0.378929	2.61648
19531	Cfa.9478.1.A1_at	0.378754	2.49155
40303	CfaAffx.6745.1.S1_s_at	0.378724	2.42134
14072	Cfa.4663.1.S1_s_at	0.378482	5.39322
8665	Cfa.18518.1.S1_at	0.37843	3.47452
37185	CfaAffx.31100.1.S1_s_at	0.378401	3.057
33454	CfaAffx.26457.1.S1_s_at	0.37821	3.05948
9052	Cfa.18926.1.S1_at	0.378189	7.69327
38770	CfaAffx.4767.1.S1_s_at	0.378034	7.98806
21381	CfaAffx.11680.1.S1_at	0.377969	2.55524
18988	Cfa.8939.1.A1_at	0.377909	2.95305
38427	CfaAffx.4348.1.S1_s_at	0.377763	8.56494
10168	Cfa.20109.1.S1_s_at	0.377588	6.85335
29751	CfaAffx.21868.1.S1_at	0.37754	5.35199
408	Cfa.10303.1.S1_at	0.377504	6.90285
21079	CfaAffx.11265.1.S1_at	0.377499	3.6437
11640	Cfa.2304.1.A1_at	0.377309	3.72073
10875	Cfa.20939.1.S1_s_at	0.377087	2.68167
5488	Cfa.14865.1.A1_at	0.376758	2.41482
10227	Cfa.20160.1.S1_at	0.376728	7.27141
28230	CfaAffx.20026.1.S1_s_at	0.376713	3.55267
31313	CfaAffx.23868.1.S1_s_at	0.376617	3.08427
2676	Cfa.12291.1.A1_at	0.376201	4.01711
9178	Cfa.19071.1.S1_s_at	0.376038	5.07292
12580	Cfa.3170.1.S1_at	0.375915	3.41699
8305	Cfa.18134.1.S1_at	0.375766	4.24187
8563	Cfa.18405.1.S1_s_at	0.375386	6.41494
28506	CfaAffx.20345.1.S1_at	0.37536	2.99993
33341	CfaAffx.26311.1.S1_at	0.375244	5.20878
3320	Cfa.1284.1.S1_a_at	0.375163	4.66255
12784	Cfa.339.1.S1_at	0.374615	7.25745
41221	CfaAffx.7872.1.S1_at	0.3746	3.33216
12474	Cfa.3066.1.S1_at	0.37449	7.85005
5215	Cfa.14607.1.A1_at	0.374484	3.30405
9422	Cfa.19383.1.S1_s_at	0.374199	4.66999
28633	CfaAffx.20490.1.S1_at	0.374094	3.72822
4105	Cfa.13574.1.S1_s_at	0.373934	6.89479
42405	CfaAffx.9279.1.S1_at	0.373756	2.91513
41271	CfaAffx.7937.1.S1_at	0.373534	4.82179
19138	Cfa.9093.1.A1_at	0.373528	2.57127
36269	CfaAffx.29935.1.S1_s_at	0.373513	5.49888
9771	Cfa.19712.1.S1_s_at	0.373299	8.33932
33060	CfaAffx.25971.1.S1_s_at	0.372937	3.22437
41572	CfaAffx.8280.1.S1_s_at	0.372889	7.86871
22251	CfaAffx.12720.1.S1_at	0.372751	6.45007
11018	Cfa.2108.1.A1_at	0.372738	6.45991
28783	CfaAffx.20683.1.S1_s_at	0.372734	7.20717
8301	Cfa.18131.1.S1_s_at	0.372498	6.33647
29232	CfaAffx.21211.1.S1_s_at	0.372466	2.50086
9245	Cfa.19141.2.A1_at	0.372314	2.49267
4694	Cfa.14118.2.A1_s_at	0.372028	8.24378
5430	Cfa.1481.1.S1_at	0.371998	6.98203
22596	CfaAffx.13109.1.S1_at	0.371982	4.78154
18974	Cfa.8922.1.A1_at	0.371928	5.71301
10054	Cfa.19994.1.S1_s_at	0.371818	7.21598
19851	Cfa.9814.1.A1_at	0.371367	6.69599
26638	CfaAffx.18069.1.S1_s_at	0.371334	4.80964
36055	CfaAffx.2968.1.S1_s_at	0.371326	2.48801
21622	CfaAffx.11964.1.S1_s_at	0.37132	6.51199
14200	Cfa.4773.1.S1_at	0.37123	5.09759
6033	Cfa.15346.1.A1_s_at	0.37119	8.89267
42524	CfaAffx.9428.1.S1_at	0.37049	2.43989
24187	CfaAffx.15080.1.S1_at	0.370308	4.39467
36941	CfaAffx.30813.1.S1_s_at	0.370206	3.01116
22827	CfaAffx.13365.1.S1_at	0.370118	2.39846
40407	CfaAffx.6859.1.S1_s_at	0.370091	6.97324
1589	Cfa.11363.1.A1_at	0.370069	2.97674
7663	Cfa.17370.1.S1_s_at	0.370051	8.24686
40124	CfaAffx.6534.1.S1_at	0.369923	4.92768
7997	Cfa.17800.1.S1_at	0.369778	3.14993
42719	CfaAffx.9666.1.S1_at	0.369533	2.40236
11285	Cfa.21378.1.S1_s_at	0.369433	3.48028
37257	CfaAffx.31194.1.S1_s_at	0.369181	6.65469
39597	CfaAffx.588.1.S1_at	0.369143	2.39158
3545	Cfa.13055.1.S1_at	0.369128	8.93448
10858	Cfa.20926.1.S1_at	0.369029	9.72392
38480	CfaAffx.4414.1.S1_at	0.368886	4.69746
8228	Cfa.1803.1.S1_at	0.368857	5.2284
42227	CfaAffx.9063.1.S1_at	0.368611	5.76712
26341	CfaAffx.17691.1.S1_at	0.368448	4.8297
9623	Cfa.19572.1.S1_at	0.368223	5.12308
6009	Cfa.15319.1.A1_s_at	0.367979	8.33255
35385	CfaAffx.28853.1.S1_at	0.367844	5.12151
22360	CfaAffx.12845.1.S1_at	0.367688	3.26583
37251	CfaAffx.31184.1.S1_s_at	0.367665	2.79947
10530	Cfa.20524.2.S1_a_at	0.367609	3.65774
6612	Cfa.15954.1.S1_at	0.367609	7.56291
34061	CfaAffx.27206.1.S1_s_at	0.36745	2.49893
12210	Cfa.2818.1.A1_at	0.367446	5.43174
35003	CfaAffx.28355.1.S1_at	0.36742	4.30303
39999	CfaAffx.6370.1.S1_s_at	0.367335	3.4729
40125	CfaAffx.6536.1.S1_at	0.367187	5.52225
33728	CfaAffx.26780.1.S1_s_at	0.367043	4.14253
3819	Cfa.13309.1.A1_at	0.367007	2.81147
28948	CfaAffx.20852.1.S1_s_at	0.367005	7.55177
16190	Cfa.6566.1.A1_at	0.36691	2.96112
42194	CfaAffx.9018.1.S1_s_at	0.366788	5.06393
9743	Cfa.19690.1.S1_at	0.36648	6.62541
4899	Cfa.1431.1.S1_at	0.366472	8.42304
26785	CfaAffx.18254.1.S1_at	0.36643	8.16419
11494	Cfa.217.1.S1_s_at	0.366343	9.19862
34639	CfaAffx.27925.1.S1_s_at	0.366256	2.3911
4867	Cfa.14278.1.A1_at	0.366247	5.66248
27771	CfaAffx.19448.1.S1_s_at	0.366229	6.60092
33950	CfaAffx.27066.1.S1_s_at	0.366153	4.7511
12470	Cfa.3063.1.S1_at	0.365857	7.1325
7441	Cfa.17108.1.S1_at	0.36571	2.69093
3044	Cfa.126.2.S1_s_at	0.365553	5.51462
8873	Cfa.18727.1.S1_at	0.365246	5.77878
24646	CfaAffx.15627.1.S1_s_at	0.365147	6.45204
34769	CfaAffx.28068.1.S1_at	0.365084	2.46908
21772	CfaAffx.12147.1.S1_s_at	0.365018	6.27761
31594	CfaAffx.24206.1.S1_s_at	0.36488	4.32834
28639	CfaAffx.20497.1.S1_s_at	0.364804	5.61784
7810	Cfa.17598.1.S1_s_at	0.36449	4.05896
37996	CfaAffx.3836.1.S1_at	0.36432	7.89117
12247	Cfa.2848.2.S1_x_at	0.364146	8.0949
19269	Cfa.9220.1.S1_s_at	0.363918	5.66919
21110	CfaAffx.11301.1.S1_at	0.363578	2.39427
9584	Cfa.19537.1.A1_at	0.363107	6.95918
20208	CfaAffx.1022.1.S1_at	0.363036	6.31189
10322	Cfa.20253.1.S1_at	0.362944	6.14174
11315	Cfa.21447.1.S1_s_at	0.36294	2.57228
12777	Cfa.338.1.S1_a_at	0.362937	7.35076
27949	CfaAffx.19678.1.S1_s_at	0.362898	4.06534
1164	Cfa.10964.1.A1_at	0.362867	7.53089
9991	Cfa.1994.1.A1_at	0.362674	5.59654
39102	CfaAffx.5231.1.S1_at	0.362634	2.41472
11477	Cfa.2163.1.A1_at	0.362626	8.66591
276	Cfa.10177.1.S1_at	0.362563	5.10395
25627	CfaAffx.16843.1.S1_s_at	0.362503	6.57532
13003	Cfa.3592.3.S1_s_at	0.362431	3.76034
19126	Cfa.9082.1.A1_at	0.362314	4.7384
30049	CfaAffx.22241.1.S1_s_at	0.362295	4.43764
22643	CfaAffx.13157.1.S1_at	0.362248	2.39044
1284	Cfa.11080.1.S1_at	0.36182	9.02965
37952	CfaAffx.3781.1.S1_s_at	0.361819	3.99358
5475	Cfa.14850.1.S1_s_at	0.361737	8.49448
41979	CfaAffx.8773.1.S1_s_at	0.361659	4.97309
34874	CfaAffx.28188.1.S1_at	0.361573	5.86093
6138	Cfa.15443.1.A1_at	0.361343	3.33299
34039	CfaAffx.27183.1.S1_at	0.361106	8.07298
36897	CfaAffx.30750.1.S1_s_at	0.361096	3.70681
30985	CfaAffx.23427.1.S1_at	0.361079	2.39024
21467	CfaAffx.11792.1.S1_s_at	0.360955	5.90372
24007	CfaAffx.1486.1.S1_s_at	0.360879	4.13252
3480	Cfa.12996.1.A1_at	0.36087	3.64385
21984	CfaAffx.12401.1.S1_at	0.360819	6.13296
33450	CfaAffx.26453.1.S1_at	0.360804	2.86453
35814	CfaAffx.29366.1.S1_s_at	0.360757	3.61373
35032	CfaAffx.28397.1.S1_s_at	0.360645	3.99134
32252	CfaAffx.25005.1.S1_s_at	0.360508	4.03735
31627	CfaAffx.24242.1.S1_s_at	0.360427	4.68812
35650	CfaAffx.29198.1.S1_s_at	0.359884	9.27273
32777	CfaAffx.25620.1.S1_s_at	0.359809	5.26851
7704	Cfa.17421.1.S1_s_at	0.359479	4.78101
23066	CfaAffx.13659.1.S1_s_at	0.359358	4.47743
34187	CfaAffx.2736.1.S1_at	0.359272	4.13111
41737	CfaAffx.8485.1.S1_at	0.359184	4.11568
20610	CfaAffx.10709.1.S1_s_at	0.359042	3.01015
17473	Cfa.766.1.A1_at	0.359009	4.42192
28251	CfaAffx.20046.1.S1_s_at	0.358992	5.64363
17288	Cfa.750.1.S1_at	0.358954	9.38814
29011	CfaAffx.20940.1.S1_at	0.358676	5.94402
23004	CfaAffx.13589.1.S1_at	0.358657	4.61633
36150	CfaAffx.29790.1.S1_s_at	0.358511	2.56393
10150	Cfa.20090.1.S1_at	0.358433	4.77269
28493	CfaAffx.20331.1.S1_at	0.35841	7.2262
4048	Cfa.13522.1.A1_s_at	0.358358	3.85794
10088	Cfa.20027.1.S1_s_at	0.35826	4.33561
40336	CfaAffx.6781.1.S1_s_at	0.358203	2.69491
10442	Cfa.20380.1.S1_s_at	0.358163	3.61717
21343	CfaAffx.11626.1.S1_s_at	0.357712	3.10387
13414	Cfa.393.1.A1_at	0.357657	4.76685
28893	CfaAffx.20797.1.S1_at	0.35732	5.24863
6654	Cfa.16029.1.A1_at	0.357003	4.7688
15070	Cfa.554.2.S1_x_at	0.356978	4.06591
29697	CfaAffx.21805.1.S1_x_at	0.356894	6.14502
17197	Cfa.7424.1.S1_s_at	0.356891	2.88115
11675	Cfa.2334.1.S1_at	0.356684	6.81093
7131	Cfa.16700.1.S1_at	0.356585	7.26449
25560	CfaAffx.16764.1.S1_at	0.356556	6.8189
5992	Cfa.15303.1.S1_at	0.356532	4.52902
157	Cfa.10050.1.A1_at	0.356117	3.4563
19905	Cfa.9874.1.S1_at	0.356096	7.03198
11794	Cfa.244.1.S1_at	0.35596	3.24893
16553	Cfa.6869.1.A1_at	0.355949	2.4584
22390	CfaAffx.1288.1.S1_at	0.355894	7.58417
1240	Cfa.11039.1.A1_s_at	0.355889	7.02567
22141	CfaAffx.12593.1.S1_at	0.355877	2.38962
36627	CfaAffx.30421.1.S1_s_at	0.355865	3.95905
37244	CfaAffx.31179.1.S1_s_at	0.355746	3.07521
40740	CfaAffx.7251.1.S1_s_at	0.355453	6.19546
28102	CfaAffx.19867.1.S1_s_at	0.355401	3.45536
10110	Cfa.20047.1.S1_s_at	0.35513	5.81676
36659	CfaAffx.30454.1.S1_s_at	0.355074	4.18337
10254	Cfa.20188.1.S1_s_at	0.355064	6.87575
17067	Cfa.7313.1.A1_at	0.354934	4.7735
12828	Cfa.3436.1.S1_at	0.354872	10.0767
21732	CfaAffx.1210.1.S1_at	0.354856	2.39166
9756	Cfa.1970.1.S1_at	0.354834	8.69598
22215	CfaAffx.12676.1.S1_at	0.354727	3.24
25965	CfaAffx.17247.1.S1_at	0.354571	7.0522
20216	CfaAffx.10230.1.S1_at	0.354492	5.80304
32660	CfaAffx.25479.1.S1_at	0.354429	3.59549
28182	CfaAffx.19969.1.S1_s_at	0.354405	4.57866
31342	CfaAffx.23905.1.S1_at	0.354386	6.32668
15337	Cfa.579.1.A1_at	0.354366	7.96636
15740	Cfa.6164.1.A1_at	0.354324	2.40258
10077	Cfa.20014.1.S1_s_at	0.354097	6.32661
22040	CfaAffx.12467.1.S1_s_at	0.353943	2.93391
39015	CfaAffx.5105.1.S1_at	0.353477	3.5818
37285	CfaAffx.31221.1.S1_s_at	0.353399	8.81482
8043	Cfa.17840.1.S1_s_at	0.353173	3.65244
32093	CfaAffx.2484.1.S1_s_at	0.353089	6.52158
29500	CfaAffx.21571.1.S1_at	0.353016	7.39683
23955	CfaAffx.14805.1.S1_s_at	0.353	4.67819
25703	CfaAffx.16929.1.S1_s_at	0.352848	7.12215
10337	Cfa.20268.2.S1_a_at	0.352802	2.90848
34041	CfaAffx.27185.1.S1_s_at	0.352668	6.74263
13266	Cfa.3804.1.S1_s_at	0.352634	9.79736
23766	CfaAffx.14580.1.S1_s_at	0.352632	3.5114
8252	Cfa.18071.1.S1_s_at	0.352494	7.29678
34060	CfaAffx.27205.1.S1_at	0.352385	2.45391
9419	Cfa.1938.1.A1_at	0.352329	9.48206
30826	CfaAffx.23221.1.S1_s_at	0.352276	5.08701
16639	Cfa.694.1.A1_at	0.35221	8.00528
26792	CfaAffx.18265.1.S1_at	0.352207	6.59922
22341	CfaAffx.12822.1.S1_s_at	0.352104	3.01736
28718	CfaAffx.20603.1.S1_s_at	0.351996	7.81794
34222	CfaAffx.27401.1.S1_s_at	0.351974	2.41646
6958	Cfa.16422.1.S1_at	0.351904	5.68889
9471	Cfa.19431.1.S1_at	0.35175	8.0691
15266	Cfa.5721.1.A1_at	0.351724	5.64987
13518	Cfa.406.1.S1_at	0.351691	6.05054
39801	CfaAffx.6146.1.S1_at	0.351635	6.54387
7037	Cfa.16551.1.S1_at	0.3516	7.34169
15769	Cfa.6193.1.A1_s_at	0.351502	3.86104
42946	CfaAffx.9964.1.S1_at	0.351251	5.7045
10201	Cfa.20137.1.S1_at	0.351246	5.51641
34431	CfaAffx.27674.1.S1_x_at	0.351146	3.40488
12346	Cfa.2942.1.S1_at	0.350863	6.28617
17406	Cfa.760.1.A1_at	0.35081	10.3288
41222	CfaAffx.7874.1.S1_at	0.350685	5.34866
5840	Cfa.15168.1.S1_at	0.350458	5.24414
40968	CfaAffx.7542.1.S1_s_at	0.350188	8.61961
39330	CfaAffx.5539.1.S1_at	0.35016	3.00268
10190	Cfa.20128.1.S1_s_at	0.350006	4.65323
40652	CfaAffx.7143.1.S1_s_at	0.349946	7.11923
29449	CfaAffx.21499.1.S1_s_at	0.349923	3.95291
18951	Cfa.8899.1.S1_s_at	0.349836	6.77586
6884	Cfa.16351.1.S1_at	0.349627	4.50077
14993	Cfa.5471.1.A1_at	0.349269	6.97351
9466	Cfa.19428.1.S1_at	0.349011	7.27506
7728	Cfa.17447.1.S1_s_at	0.348953	6.41253
35529	CfaAffx.2905.1.S1_s_at	0.348782	5.88756
39465	CfaAffx.5708.1.S1_at	0.348746	3.71163
9835	Cfa.19776.1.S1_s_at	0.348707	6.25268
17824	Cfa.7966.1.A1_at	0.348685	2.82097
9822	Cfa.19764.1.S1_s_at	0.348461	5.09879
7532	Cfa.1722.1.S1_at	0.348374	5.00995
36715	CfaAffx.30529.1.S1_s_at	0.348273	3.79288
3975	Cfa.13453.1.A1_at	0.348238	2.77703
37094	CfaAffx.30994.1.S1_s_at	0.348147	10.1973
8726	Cfa.18583.1.S1_at	0.347973	5.73497
22908	CfaAffx.13462.1.S1_at	0.347818	6.9546
919	Cfa.10746.1.S1_s_at	0.347784	6.70722
10014	Cfa.19957.1.S1_s_at	0.347673	8.16025
7004	Cfa.16498.1.S1_s_at	0.347526	2.43197
10047	Cfa.19989.1.S1_s_at	0.347525	6.22664
9131	Cfa.19010.1.S1_at	0.347395	2.54175
34984	CfaAffx.28326.1.S1_s_at	0.347106	5.72923
12004	Cfa.2632.1.S1_s_at	0.347064	6.0552
32274	CfaAffx.25031.1.S1_at	0.347009	3.01201
29077	CfaAffx.21011.1.S1_at	0.346993	4.43427
38671	CfaAffx.465.1.S1_s_at	0.346917	9.40335
3852	Cfa.13336.1.A1_at	0.346889	3.78957
19238	Cfa.9193.1.A1_s_at	0.346868	8.3104
5512	Cfa.1489.1.A1_s_at	0.346723	4.43763
9757	Cfa.19700.1.S1_at	0.346709	3.42973
19697	Cfa.9650.1.S1_at	0.346492	3.64207
4494	Cfa.13940.1.A1_at	0.346332	2.87505
302	Cfa.10201.1.S1_at	0.346279	4.85965
34307	CfaAffx.27516.1.S1_s_at	0.346214	6.34444
24453	CfaAffx.15399.1.S1_a_at	0.345827	5.63976
7711	Cfa.17428.1.S1_at	0.345746	2.53142
17935	Cfa.8054.1.S1_s_at	0.34566	2.8434
40982	CfaAffx.7563.1.S1_at	0.345658	3.54961
34786	CfaAffx.28089.1.S1_at	0.345601	4.86609
40557	CfaAffx.7031.1.S1_at	0.345226	2.80633
19135	Cfa.9091.1.A1_at	0.345134	3.62506
29037	CfaAffx.20971.1.S1_at	0.344654	2.4269
7328	Cfa.1695.1.S1_at	0.344229	7.79269
29639	CfaAffx.2174.1.S1_at	0.344204	4.77126
28605	CfaAffx.20460.1.S1_s_at	0.344087	4.91272
25216	CfaAffx.16319.1.S1_at	0.343959	6.27474
8287	Cfa.18114.1.S1_at	0.343714	2.78984
37568	CfaAffx.3303.1.S1_s_at	0.343659	5.36745
37269	CfaAffx.31208.1.S1_s_at	0.343464	2.46934
29256	CfaAffx.21251.1.S1_s_at	0.343254	4.9049
13793	Cfa.444.1.A1_at	0.343151	4.13693
42787	CfaAffx.9754.1.S1_s_at	0.342959	2.52337
7473	Cfa.17141.1.S1_at	0.342887	6.13173
33419	CfaAffx.26409.1.S1_at	0.34284	3.04535
540	Cfa.10420.1.A1_at	0.342836	4.95798
21827	CfaAffx.12215.1.S1_at	0.342745	5.89141
10350	Cfa.20285.1.S1_s_at	0.342634	5.0289
10816	Cfa.20888.1.S1_s_at	0.342607	7.04582
36225	CfaAffx.29884.1.S1_s_at	0.342189	3.65028
39979	CfaAffx.6350.1.S1_at	0.342132	3.27379
8081	Cfa.17880.1.S1_at	0.342077	7.43372
11882	Cfa.2520.1.A1_at	0.342013	4.87034
5762	Cfa.15098.1.A1_at	0.341861	2.72677
1251	Cfa.11050.1.S1_s_at	0.341783	9.25151
1507	Cfa.1129.2.S1_at	0.341587	6.35119
34196	CfaAffx.2737.1.S1_at	0.34155	3.58824
11061	Cfa.21126.1.S1_s_at	0.341454	8.34993
40064	CfaAffx.6449.1.S1_s_at	0.341256	4.86022
3181	Cfa.12712.1.S1_at	0.341176	5.98537
5980	Cfa.15291.1.A1_at	0.34101	3.35383
30498	CfaAffx.22793.1.S1_at	0.34096	4.53547
19606	Cfa.9550.1.A1_at	0.340891	7.39172
12725	Cfa.3324.1.S1_at	0.340755	5.8075
14965	Cfa.545.1.S1_at	0.340742	8.33566
38907	CfaAffx.4947.1.S1_at	0.340618	5.14427
8973	Cfa.18836.1.S1_at	0.340572	2.5562
21759	CfaAffx.12133.1.S1_at	0.340488	4.85547
20244	CfaAffx.10261.1.S1_at	0.340297	3.77017
9837	Cfa.19777.1.S1_s_at	0.340292	8.93187
28933	CfaAffx.20839.1.S1_at	0.340284	3.54891
27443	CfaAffx.19051.1.S1_at	0.340232	3.84435
39333	CfaAffx.5540.1.S1_s_at	0.339981	5.00059
28144	CfaAffx.19917.1.S1_at	0.339884	6.36196
9469	Cfa.1943.1.A1_at	0.339868	5.59675
13978	Cfa.4586.1.A1_at	0.339788	2.55163
5794	Cfa.15127.1.A1_at	0.339689	3.7236
13821	Cfa.4473.1.A1_at	0.339679	2.38667
12099	Cfa.2719.1.A1_at	0.339668	7.26486
6898	Cfa.16364.1.A1_at	0.339423	7.96716
2725	Cfa.12337.1.A1_at	0.339396	5.67713
30116	CfaAffx.22324.1.S1_s_at	0.339347	4.86409
38079	CfaAffx.3936.1.S1_at	0.339269	4.2782
21061	CfaAffx.11246.1.S1_s_at	0.339225	2.47931
4143	Cfa.13609.1.A1_s_at	0.339194	4.19765
39114	CfaAffx.5246.1.S1_s_at	0.339063	10.0519
9278	Cfa.19165.1.S1_s_at	0.339036	5.96295
8688	Cfa.18543.1.S1_s_at	0.339033	6.77184
22332	CfaAffx.12815.1.S1_at	0.339	4.76413
13168	Cfa.373.2.A1_at	0.338617	3.17661
29471	CfaAffx.21533.1.S1_s_at	0.33837	2.74129
12507	Cfa.3098.1.S1_at	0.338355	5.00049
3466	Cfa.12979.1.S1_at	0.338141	2.41373
8381	Cfa.18207.1.S1_s_at	0.338085	10.8043
18616	Cfa.8611.3.A1_at	0.337971	4.76166
40025	CfaAffx.6404.1.S1_at	0.337787	2.71365
18338	Cfa.8392.1.A1_at	0.33776	2.42885
12844	Cfa.3452.1.S1_s_at	0.337727	5.80752
23889	CfaAffx.14736.1.S1_at	0.337658	6.59273
13564	Cfa.413.1.S1_at	0.337367	8.03942
29096	CfaAffx.21040.1.S1_s_at	0.337305	5.77403
30989	CfaAffx.23436.1.S1_at	0.33728	5.75978
9899	Cfa.19839.1.S1_s_at	0.337141	2.43501
5530	Cfa.1490.2.S1_a_at	0.337088	4.71446
5954	Cfa.15263.2.A1_at	0.336906	3.95182
35256	CfaAffx.28689.1.S1_s_at	0.336042	5.64094
30733	CfaAffx.23108.1.S1_s_at	0.33567	5.28098
20375	CfaAffx.10413.1.S1_at	0.335638	8.07071
10555	Cfa.20572.1.A1_s_at	0.335536	9.95406
5243	Cfa.14629.1.S1_at	0.335521	3.05735
8149	Cfa.17951.1.S1_at	0.335375	5.92732
26553	CfaAffx.1797.1.S1_s_at	0.33532	5.61132
27624	CfaAffx.19266.1.S1_at	0.335317	9.99518
42358	CfaAffx.9232.1.S1_s_at	0.335181	9.40825
25278	CfaAffx.16404.1.S1_at	0.335049	4.68163
9213	Cfa.19115.1.S1_at	0.334967	4.41132
20918	CfaAffx.11074.1.S1_s_at	0.334886	4.07564
33209	CfaAffx.26158.1.S1_at	0.334866	4.91122
31577	CfaAffx.24188.1.S1_s_at	0.334665	5.29222
41439	CfaAffx.8114.1.S1_s_at	0.334603	3.66919
22299	CfaAffx.12780.1.S1_at	0.334431	5.96139
26413	CfaAffx.17781.1.S1_at	0.33426	5.0284
23055	CfaAffx.13644.1.S1_at	0.334115	5.35317
27840	CfaAffx.19547.1.S1_at	0.33411	2.62205
10261	Cfa.20194.1.S1_s_at	0.333994	6.9722
33449	CfaAffx.26450.1.S1_s_at	0.333757	8.10852
42849	CfaAffx.9834.1.S1_s_at	0.333741	3.09917
3523	Cfa.13035.1.A1_at	0.333688	2.50733
34190	CfaAffx.27363.1.S1_at	0.333666	2.91518
5793	Cfa.15126.2.S1_s_at	0.333644	5.60347
6042	Cfa.15354.1.S1_s_at	0.333451	7.79904
24643	CfaAffx.15625.1.S1_at	0.333306	4.75324
31093	CfaAffx.23575.1.S1_at	0.333285	7.13764
27318	CfaAffx.18901.1.S1_at	0.332968	3.40959
37869	CfaAffx.3679.1.S1_s_at	0.332874	3.84777
8997	Cfa.18873.1.S1_s_at	0.332763	4.80073
24573	CfaAffx.15541.1.S1_s_at	0.332719	5.29474
39811	CfaAffx.6158.1.S1_at	0.332684	5.78549
27242	CfaAffx.18802.1.S1_at	0.332625	6.66754
6922	Cfa.16388.3.A1_at	0.332449	5.21385
10103	Cfa.20041.1.S1_s_at	0.33229	3.22517
16833	Cfa.7107.1.A1_at	0.332235	5.24509
10423	Cfa.20358.1.S1_s_at	0.332196	4.59932
9246	Cfa.19142.1.S1_s_at	0.33216	6.30731
35479	CfaAffx.28989.1.S1_s_at	0.33205	5.90615
10494	Cfa.20464.1.S1_at	0.331724	5.13261
6849	Cfa.1632.1.S1_at	0.331481	7.35795
39348	CfaAffx.5558.1.S1_s_at	0.331139	7.13178
29298	CfaAffx.21308.1.S1_s_at	0.331048	6.87388
10846	Cfa.20914.1.S1_s_at	0.330999	5.76625
467	Cfa.10355.2.A1_s_at	0.33068	5.16336
9815	Cfa.19756.2.A1_at	0.330644	4.46227
25363	CfaAffx.1651.1.S1_at	0.330638	5.95744
21584	CfaAffx.11926.1.S1_s_at	0.330547	5.99707
6487	Cfa.15754.1.A1_at	0.329836	2.38503
15170	Cfa.563.1.S1_at	0.329799	7.13835
28150	CfaAffx.19921.1.S1_s_at	0.32979	6.15714
27309	CfaAffx.18891.1.S1_at	0.329747	3.34573
23711	CfaAffx.1450.1.S1_s_at	0.32968	9.71471
14196	Cfa.4771.1.A1_at	0.329415	3.85655
21080	CfaAffx.11265.1.S1_s_at	0.329386	3.2837
15710	Cfa.6134.1.S1_at	0.329359	3.95719
16030	Cfa.6413.1.A1_at	0.329339	6.64863
22159	CfaAffx.12612.1.S1_at	0.329315	4.26655
33470	CfaAffx.26475.1.S1_at	0.329242	3.37536
835	Cfa.10672.1.S1_s_at	0.329146	4.16519
21650	CfaAffx.11997.1.S1_at	0.329077	4.51895
7551	Cfa.1724.2.A1_at	0.329065	5.8805
3449	Cfa.12958.1.A1_at	0.329001	4.90202
39917	CfaAffx.6271.1.S1_s_at	0.328963	4.14582
21287	CfaAffx.11557.1.S1_s_at	0.328843	7.28085
33361	CfaAffx.26343.1.S1_s_at	0.328709	4.41335
12768	Cfa.3371.1.S1_at	0.328605	8.88327
19881	Cfa.9849.2.S1_s_at	0.328402	8.80859
31050	CfaAffx.23524.1.S1_s_at	0.328343	5.0178
16007	Cfa.6395.1.A1_at	0.328042	5.53572
210	Cfa.10107.1.A1_a_at	0.327966	9.11244
28943	CfaAffx.20848.1.S1_s_at	0.327837	8.86677
10654	Cfa.20712.1.S1_s_at	0.327788	6.0189
13592	Cfa.4166.1.S1_s_at	0.327756	3.74403
30292	CfaAffx.22527.1.S1_s_at	0.327736	2.38468
35648	CfaAffx.29195.1.S1_at	0.327728	2.86555
35313	CfaAffx.28758.1.S1_s_at	0.327523	5.99131
4440	Cfa.13884.1.A1_at	0.327278	4.26069
733	Cfa.10581.1.S1_s_at	0.327138	7.10795
22188	CfaAffx.12647.1.S1_at	0.32711	7.00537
18643	Cfa.8636.1.A1_at	0.327079	2.41272
6404	Cfa.15684.1.A1_s_at	0.327052	6.05659
1308	Cfa.11104.1.S1_at	0.326927	5.93771
26105	CfaAffx.17409.1.S1_at	0.326902	6.24625
9477	Cfa.19438.1.S1_at	0.326831	6.60005
16065	Cfa.6448.1.A1_at	0.326753	2.40355
22874	CfaAffx.13413.1.S1_s_at	0.326724	5.97494
10981	Cfa.21036.1.S1_s_at	0.326574	3.79607
28187	CfaAffx.19978.1.S1_at	0.326527	9.60375
36037	CfaAffx.2966.1.S1_s_at	0.326487	5.50949
27911	CfaAffx.19628.1.S1_s_at	0.326451	5.70499
3599	Cfa.131.1.S1_at	0.326398	2.43777
25637	CfaAffx.16853.1.S1_at	0.3263	2.52915
603	Cfa.10482.1.A1_at	0.326219	6.09112
37697	CfaAffx.3460.1.S1_s_at	0.326197	6.48151
26793	CfaAffx.18267.1.S1_at	0.326027	5.72343
10798	Cfa.20869.1.S1_s_at	0.325925	8.15116
6881	Cfa.16349.2.S1_s_at	0.325866	5.70128
41586	CfaAffx.8297.1.S1_s_at	0.325735	5.15589
22024	CfaAffx.12446.1.S1_s_at	0.325621	8.03089
24066	CfaAffx.14933.1.S1_s_at	0.325548	3.17795
32515	CfaAffx.25315.1.S1_s_at	0.325472	3.62262
37713	CfaAffx.3482.1.S1_s_at	0.325381	4.38839
30113	CfaAffx.22311.1.S1_at	0.325346	3.11681
3150	Cfa.12686.1.A1_at	0.325308	2.41769
41554	CfaAffx.8261.1.S1_at	0.325288	2.44342
6570	Cfa.1585.1.A1_s_at	0.325158	9.07282
25947	CfaAffx.17227.1.S1_at	0.325128	4.84497
30343	CfaAffx.22594.1.S1_s_at	0.325116	5.63335
30614	CfaAffx.22960.1.S1_s_at	0.325031	6.03435
11278	Cfa.21370.1.S1_s_at	0.325013	6.92711
22708	CfaAffx.13224.1.S1_s_at	0.324983	3.84576
2805	Cfa.12395.1.A1_at	0.324876	5.12411
37095	CfaAffx.30997.1.S1_at	0.324762	8.27046
21701	CfaAffx.12058.1.S1_s_at	0.324525	4.65696
12677	Cfa.327.1.A1_s_at	0.324456	9.51956
11948	Cfa.258.1.S1_at	0.324316	4.2451
16329	Cfa.668.1.A1_at	0.324198	2.50269
11548	Cfa.2221.1.A1_at	0.324176	4.72111
17513	Cfa.7698.1.S1_at	0.323913	2.58881
24547	CfaAffx.15509.1.S1_s_at	0.323829	4.69647
11341	Cfa.21482.1.S1_s_at	0.323623	2.48047
17190	Cfa.7418.1.A1_a_at	0.323606	2.91709
1121	Cfa.1092.1.S1_at	0.323555	9.6155
34953	CfaAffx.28292.1.S1_at	0.32352	6.21777
36657	CfaAffx.30453.1.S1_at	0.323454	4.08882
27292	CfaAffx.18871.1.S1_at	0.323251	6.59213
20587	CfaAffx.10678.1.S1_at	0.323206	4.4046
39965	CfaAffx.6334.1.S1_at	0.323137	10.5469
34903	CfaAffx.28226.1.S1_s_at	0.32294	3.18255
27695	CfaAffx.19351.1.S1_s_at	0.322857	4.95437
40276	CfaAffx.6715.1.S1_s_at	0.322816	4.36661
11312	Cfa.2143.1.A1_at	0.322691	4.98414
24243	CfaAffx.15156.1.S1_at	0.322608	8.92837
8825	Cfa.18684.1.S1_at	0.32255	5.56405
9810	Cfa.19752.1.S1_s_at	0.32247	5.42482
40314	CfaAffx.6758.1.S1_s_at	0.322421	5.66241
26278	CfaAffx.17623.1.S1_s_at	0.32213	3.45973
31474	CfaAffx.24050.1.S1_s_at	0.322082	3.07382
1163	Cfa.10963.1.A1_s_at	0.322079	6.56977
13357	Cfa.3879.1.S1_s_at	0.321923	6.45706
37023	CfaAffx.30908.1.S1_s_at	0.321914	5.95119
26661	CfaAffx.1810.1.S1_s_at	0.321897	6.4946
4189	Cfa.13649.1.A1_s_at	0.321821	3.42731
9954	Cfa.19897.1.S1_s_at	0.321805	6.52871
35130	CfaAffx.28535.1.S1_x_at	0.321731	4.88666
19500	Cfa.9448.1.A1_at	0.321668	3.25225
40316	CfaAffx.6761.1.S1_at	0.321566	2.85359
7016	Cfa.16512.1.S1_s_at	0.32151	5.30455
12861	Cfa.347.1.S1_at	0.321452	7.05214
12322	Cfa.292.1.A1_at	0.321383	5.24843
39554	CfaAffx.5822.1.S1_at	0.321373	6.03336
3911	Cfa.13390.2.A1_s_at	0.321271	4.23485
23874	CfaAffx.14710.1.S1_at	0.321158	7.50445
19271	Cfa.9222.1.A1_at	0.321057	4.98598
17938	Cfa.8055.3.A1_s_at	0.321035	6.26925
25376	CfaAffx.16531.1.S1_at	0.320863	9.28323
36023	CfaAffx.29644.1.S1_s_at	0.320759	2.41603
19249	Cfa.9204.1.A1_at	0.320677	4.29942
27240	CfaAffx.18799.1.S1_at	0.320411	4.80346
2027	Cfa.11753.1.A1_at	0.320267	5.63387
9740	Cfa.19688.1.S1_at	0.31985	7.62266
9753	Cfa.19698.1.S1_s_at	0.319848	8.76098
20875	CfaAffx.11025.1.S1_x_at	0.319782	2.81678
10849	Cfa.20917.1.S1_s_at	0.319762	2.98916
31308	CfaAffx.2386.1.S1_s_at	0.319754	2.40727
32409	CfaAffx.25186.1.S1_s_at	0.319643	2.3875
31956	CfaAffx.24677.1.S1_at	0.319506	3.44667
10453	Cfa.20397.1.S1_s_at	0.319496	5.51012
8905	Cfa.18761.1.S1_s_at	0.319477	4.66206
1877	Cfa.11622.1.A1_at	0.3192	3.98544
9891	Cfa.19832.1.S1_x_at	0.319133	4.46495
33649	CfaAffx.26683.1.S1_at	0.318948	5.31481
30087	CfaAffx.2228.1.S1_s_at	0.318863	6.59225
12765	Cfa.3368.1.S1_at	0.318804	7.83299
36176	CfaAffx.29820.1.S1_s_at	0.318715	6.12946
3159	Cfa.12693.1.A1_x_at	0.318509	2.6851
41211	CfaAffx.7859.1.S1_at	0.318445	7.12296
41609	CfaAffx.8335.1.S1_at	0.318389	5.73358
20090	CfaAffx.10089.1.S1_x_at	0.318265	3.89961
21648	CfaAffx.11995.1.S1_s_at	0.318232	3.64145
18100	Cfa.8199.1.S1_at	0.318104	2.77237
[truncated: 41,036 more rows]

## Sheet: Contrast2 (b)
	ID	M	A
27123	CfaAffx.18660.1.S1_at	1.56038	3.31075
9549	Cfa.19506.1.S1_at	1.52696	3.65048
38751	CfaAffx.4743.1.S1_s_at	1.48543	2.57763
29581	CfaAffx.21669.1.S1_at	1.37533	2.98142
34732	CfaAffx.28029.1.S1_at	1.26275	3.62735
7685	Cfa.17400.1.S1_s_at	1.23998	3.81681
42106	CfaAffx.8916.1.S1_at	1.21146	4.02326
7702	Cfa.1742.1.S1_at	1.19885	2.61248
42714	CfaAffx.9657.1.S1_s_at	1.18005	4.60527
8902	Cfa.18759.2.S1_at	1.15755	5.98451
41568	CfaAffx.8275.1.S1_at	1.13643	3.80281
34520	CfaAffx.27780.1.S1_at	1.12095	3.95279
22155	CfaAffx.12608.1.S1_at	1.10763	4.48259
30111	CfaAffx.2231.1.S1_at	1.06134	2.61243
13929	Cfa.4545.1.S1_s_at	1.06029	3.10145
31261	CfaAffx.23800.1.S1_s_at	1.05455	3.82146
8329	Cfa.18158.2.S1_a_at	1.0472	3.08536
28951	CfaAffx.20855.1.S1_s_at	1.03925	3.90947
14138	Cfa.4720.1.A1_at	1.03375	2.51649
41677	CfaAffx.8413.1.S1_at	1.03021	2.52931
5906	Cfa.15220.2.A1_at	1.02674	2.95054
20514	CfaAffx.10578.1.S1_at	1.01054	2.50196
22399	CfaAffx.12890.1.S1_at	1.01021	3.25259
41617	CfaAffx.8343.1.S1_s_at	1.00416	3.68106
15208	Cfa.5668.1.A1_at	1.00322	3.53009
13095	Cfa.3672.1.S1_s_at	0.997652	2.89839
29351	CfaAffx.21371.1.S1_at	0.984257	3.24836
10246	Cfa.20176.2.S1_at	0.9761	3.28773
466	Cfa.10355.1.A1_s_at	0.97456	3.21351
39866	CfaAffx.6214.1.S1_at	0.967902	4.57068
32373	CfaAffx.25145.1.S1_s_at	0.9656	3.25598
35177	CfaAffx.28584.1.S1_at	0.964997	5.03987
9208	Cfa.19112.2.A1_at	0.961375	2.99964
29839	CfaAffx.21982.1.S1_at	0.960247	4.49124
20151	CfaAffx.10154.1.S1_at	0.956397	3.53247
41178	CfaAffx.7822.1.S1_s_at	0.949493	3.64857
18786	Cfa.8759.1.A1_at	0.943026	2.62069
31299	CfaAffx.23845.1.S1_s_at	0.938929	4.29196
25767	CfaAffx.17.1.S1_s_at	0.938605	4.21115
10351	Cfa.20286.1.S1_at	0.936892	4.3211
7045	Cfa.16560.1.S1_s_at	0.936841	2.63735
3108	Cfa.12651.1.A1_at	0.936068	3.14757
39905	CfaAffx.6258.1.S1_at	0.93396	3.18994
15348	Cfa.5799.1.A1_at	0.933586	3.54217
40276	CfaAffx.6715.1.S1_s_at	0.930622	4.36661
12313	Cfa.2909.1.A1_at	0.929424	3.68204
39309	CfaAffx.5518.1.S1_at	0.928916	4.96787
38669	CfaAffx.4647.1.S1_s_at	0.926788	2.48453
6932	Cfa.16393.1.A1_s_at	0.925948	4.02222
12485	Cfa.3073.1.A1_at	0.919806	4.87468
5409	Cfa.14791.1.A1_s_at	0.918942	3.73755
940	Cfa.10768.1.S1_at	0.91802	4.622
10390	Cfa.20324.1.S1_at	0.917558	3.80873
40554	CfaAffx.7029.1.S1_s_at	0.910365	4.04655
30887	CfaAffx.23300.1.S1_at	0.909592	3.08768
23527	CfaAffx.14252.1.S1_s_at	0.907056	4.92939
42108	CfaAffx.8918.1.S1_at	0.906147	4.02297
29526	CfaAffx.21602.1.S1_at	0.901566	3.05379
3601	Cfa.13100.1.A1_at	0.900728	4.46245
40976	CfaAffx.7555.1.S1_at	0.900538	4.85525
11869	Cfa.2509.1.S1_at	0.899887	2.84895
34577	CfaAffx.27859.1.S1_at	0.897809	4.72774
20916	CfaAffx.11072.1.S1_s_at	0.89635	3.08458
36628	CfaAffx.30423.1.S1_at	0.893891	4.50811
33735	CfaAffx.26792.1.S1_at	0.892714	3.05559
15456	Cfa.5893.1.A1_at	0.890248	4.01074
4919	Cfa.14332.1.A1_at	0.884263	3.12271
27309	CfaAffx.18891.1.S1_at	0.880244	3.34573
18627	Cfa.8621.1.A1_s_at	0.877962	4.51976
24139	CfaAffx.15012.1.S1_s_at	0.876327	3.31715
34183	CfaAffx.27355.1.S1_s_at	0.875027	4.13883
17847	Cfa.7989.1.A1_at	0.873911	4.48473
5502	Cfa.14882.1.A1_at	0.871926	3.2711
7862	Cfa.17650.1.S1_s_at	0.870432	5.47879
32592	CfaAffx.254.1.S1_at	0.862472	3.66423
19104	Cfa.9056.1.A1_at	0.860596	3.50437
4296	Cfa.13747.1.A1_at	0.86044	3.16593
7601	Cfa.17302.1.S1_s_at	0.860383	3.16731
10984	Cfa.21038.1.S1_s_at	0.859451	3.35323
11264	Cfa.21354.1.S1_s_at	0.858924	4.09185
24082	CfaAffx.14947.1.S1_at	0.858234	4.31268
35135	CfaAffx.2854.1.S1_at	0.857238	3.14705
26992	CfaAffx.18505.1.S1_at	0.856038	4.46995
11778	Cfa.2423.1.A1_at	0.852881	4.28458
4040	Cfa.13513.1.A1_at	0.851642	2.9708
9509	Cfa.19469.1.S1_s_at	0.850623	3.56421
7042	Cfa.16559.1.A1_at	0.848835	2.71139
28859	CfaAffx.20764.1.S1_at	0.847481	4.0072
23521	CfaAffx.14247.1.S1_at	0.844419	4.56784
34688	CfaAffx.27978.1.S1_at	0.843825	2.96302
21293	CfaAffx.11565.1.S1_s_at	0.842761	5.01143
26064	CfaAffx.17369.1.S1_s_at	0.841438	2.81057
8743	Cfa.18602.1.S1_at	0.84028	4.68912
37691	CfaAffx.3455.1.S1_s_at	0.838501	4.99794
19314	Cfa.9270.1.A1_at	0.838147	5.1698
33934	CfaAffx.27043.1.S1_at	0.837631	4.12278
15242	Cfa.5699.1.A1_at	0.837317	3.24405
9589	Cfa.19541.1.S1_s_at	0.837314	3.50661
23662	CfaAffx.14438.1.S1_at	0.835491	3.60217
28620	CfaAffx.20477.1.S1_s_at	0.833146	5.19331
39426	CfaAffx.5661.1.S1_s_at	0.831084	4.8077
41008	CfaAffx.759.1.S1_at	0.829018	3.91407
2929	Cfa.12500.1.A1_at	0.826686	9.95899
34514	CfaAffx.27775.1.S1_at	0.826083	3.07928
23926	CfaAffx.14777.1.S1_s_at	0.823586	4.42645
12386	Cfa.298.1.S1_x_at	0.818038	3.33461
32403	CfaAffx.25179.1.S1_s_at	0.813007	4.06833
8164	Cfa.17966.1.S1_s_at	0.81123	4.55945
9137	Cfa.19017.1.S1_at	0.809488	3.12776
24991	CfaAffx.16047.1.S1_at	0.80814	4.0411
39970	CfaAffx.6341.1.S1_at	0.806568	3.998
8100	Cfa.17899.1.S1_s_at	0.805958	3.93618
18897	Cfa.8848.1.A1_at	0.805299	4.20894
38496	CfaAffx.4436.1.S1_at	0.801923	4.46239
442	Cfa.10333.1.A1_at	0.800413	3.57171
21183	CfaAffx.1141.1.S1_at	0.800173	4.3209
36659	CfaAffx.30454.1.S1_s_at	0.795171	4.18337
5634	Cfa.14989.3.A1_at	0.794607	2.66267
36965	CfaAffx.30845.1.S1_at	0.793077	2.68753
6131	Cfa.15436.1.A1_at	0.791945	3.44161
20152	CfaAffx.10154.1.S1_s_at	0.791911	4.54139
23544	CfaAffx.14279.1.S1_s_at	0.790434	3.85616
7802	Cfa.17586.1.S1_s_at	0.7877	4.85077
34008	CfaAffx.27136.1.S1_at	0.785097	4.04594
42467	CfaAffx.9355.1.S1_at	0.784397	4.4283
22586	CfaAffx.131.1.S1_at	0.780672	3.69314
33461	CfaAffx.26463.1.S1_at	0.780316	3.43631
35862	CfaAffx.29432.1.S1_at	0.779978	3.39244
34900	CfaAffx.28220.1.S1_at	0.776893	3.8698
3465	Cfa.12978.1.S1_at	0.776486	3.19226
28416	CfaAffx.20241.1.S1_at	0.776165	3.13107
41117	CfaAffx.7740.1.S1_at	0.775497	2.7989
33924	CfaAffx.27034.1.S1_at	0.774828	3.17453
23076	CfaAffx.13672.1.S1_at	0.773033	2.87462
25308	CfaAffx.16440.1.S1_at	0.769932	5.47432
6785	Cfa.16245.1.S1_at	0.769567	3.45177
33535	CfaAffx.26547.1.S1_s_at	0.769387	4.51927
4431	Cfa.13873.2.A1_s_at	0.768159	5.72575
40397	CfaAffx.6848.1.S1_at	0.767524	3.63993
10679	Cfa.20738.1.S1_s_at	0.76705	4.08276
7660	Cfa.17368.1.S1_s_at	0.766505	4.08451
35171	CfaAffx.28579.1.S1_at	0.765437	4.33672
4974	Cfa.14379.1.A1_s_at	0.764149	4.87508
2107	Cfa.11821.1.A1_s_at	0.762929	4.23254
3876	Cfa.13356.1.A1_at	0.762817	4.17981
11771	Cfa.2417.3.A1_a_at	0.76265	2.62344
41932	CfaAffx.8717.1.S1_s_at	0.762343	5.46779
1054	Cfa.10866.1.S1_s_at	0.76234	4.22415
14070	Cfa.4663.1.S1_a_at	0.760389	6.00936
40282	CfaAffx.6720.1.S1_at	0.759891	3.789
26729	CfaAffx.18178.1.S1_at	0.759283	2.5068
36871	CfaAffx.30715.1.S1_at	0.75905	4.98202
19281	Cfa.9232.1.A1_at	0.758135	3.73024
37806	CfaAffx.3602.1.S1_at	0.75811	4.20695
23153	CfaAffx.13785.1.S1_s_at	0.756973	7.75894
34050	CfaAffx.27192.1.S1_at	0.755773	3.6755
29979	CfaAffx.22145.1.S1_at	0.755313	3.43497
26805	CfaAffx.18280.1.S1_s_at	0.754632	7.11851
25467	CfaAffx.16654.1.S1_s_at	0.75393	3.67754
16851	Cfa.7120.1.A1_s_at	0.753718	3.51702
12309	Cfa.2905.1.A1_s_at	0.75319	3.27486
2741	Cfa.1235.2.S1_x_at	0.753083	2.5402
42188	CfaAffx.9012.1.S1_at	0.752351	2.84344
7604	Cfa.17304.1.S1_s_at	0.752114	5.52039
27118	CfaAffx.18655.1.S1_at	0.74826	4.63262
5230	Cfa.14621.1.S1_a_at	0.746094	3.04927
20322	CfaAffx.10344.1.S1_at	0.745825	4.98691
19579	Cfa.9524.1.A1_at	0.743278	3.61931
11844	Cfa.2488.1.A1_at	0.741989	3.35038
30258	CfaAffx.22478.1.S1_s_at	0.741508	4.57088
30027	CfaAffx.22212.1.S1_s_at	0.739776	2.59946
7065	Cfa.16590.1.S1_s_at	0.739594	2.64725
34607	CfaAffx.27890.1.S1_s_at	0.73884	4.66882
10823	Cfa.20893.1.S1_at	0.738533	3.47999
29200	CfaAffx.2118.1.S1_at	0.738525	2.6058
1002	Cfa.10823.1.A1_s_at	0.738476	2.83486
41518	CfaAffx.8219.1.S1_s_at	0.736391	4.59951
24762	CfaAffx.15776.1.S1_s_at	0.734768	4.17986
10368	Cfa.20302.1.S1_at	0.733925	4.07764
39062	CfaAffx.5173.1.S1_at	0.733885	3.88002
33839	CfaAffx.26925.1.S1_s_at	0.733671	4.15339
38413	CfaAffx.4331.1.S1_at	0.73135	4.25313
30852	CfaAffx.23250.1.S1_at	0.731161	2.74518
34862	CfaAffx.28176.1.S1_at	0.731134	4.08882
24853	CfaAffx.15888.1.S1_s_at	0.731052	3.53675
9465	Cfa.19427.1.S1_s_at	0.730432	3.15876
8525	Cfa.18365.1.S1_s_at	0.727657	3.14694
15753	Cfa.6179.1.A1_x_at	0.727242	3.12507
13576	Cfa.4147.1.A1_at	0.727035	4.55225
40590	CfaAffx.7062.1.S1_s_at	0.726859	4.12966
5066	Cfa.14472.1.A1_at	0.725896	2.57011
37909	CfaAffx.3733.1.S1_at	0.725323	4.17975
33697	CfaAffx.26740.1.S1_s_at	0.724254	3.62803
32034	CfaAffx.24776.1.S1_s_at	0.721483	2.97128
4399	Cfa.13848.1.A1_at	0.719882	3.2789
25681	CfaAffx.1690.1.S1_at	0.71844	3.20712
680	Cfa.10542.1.S1_at	0.718263	4.64071
7793	Cfa.17578.1.S1_at	0.717906	4.97199
22151	CfaAffx.12605.1.S1_at	0.71772	5.98249
31103	CfaAffx.23585.1.S1_at	0.716754	4.5075
8737	Cfa.18596.2.S1_s_at	0.716076	5.20814
24866	CfaAffx.15900.1.S1_s_at	0.713234	3.25637
36956	CfaAffx.30837.1.S1_s_at	0.713177	4.46589
23229	CfaAffx.13883.1.S1_at	0.712082	6.63579
22811	CfaAffx.13345.1.S1_s_at	0.712032	3.21618
35156	CfaAffx.28562.1.S1_s_at	0.711118	2.68329
23592	CfaAffx.14349.1.S1_at	0.711069	2.50686
35339	CfaAffx.28788.1.S1_at	0.709821	2.61568
26663	CfaAffx.18103.1.S1_at	0.708184	4.99391
29369	CfaAffx.21391.1.S1_s_at	0.70814	2.70732
8265	Cfa.18089.1.S1_s_at	0.707823	3.49632
10057	Cfa.19997.1.S1_at	0.704824	5.16335
37633	CfaAffx.3381.1.S1_at	0.703787	2.69582
26876	CfaAffx.18358.1.S1_at	0.703568	2.47353
6457	Cfa.15729.1.A1_at	0.7031	3.00052
38450	CfaAffx.4376.1.S1_at	0.703075	2.69939
21887	CfaAffx.12278.1.S1_s_at	0.702826	2.90759
35807	CfaAffx.2936.1.S1_s_at	0.702245	4.06006
41280	CfaAffx.7948.1.S1_at	0.702149	3.24515
42927	CfaAffx.9938.1.S1_at	0.702146	3.679
37727	CfaAffx.3499.1.S1_at	0.701082	3.63366
38014	CfaAffx.386.1.S1_x_at	0.700959	8.39768
29470	CfaAffx.21532.1.S1_s_at	0.70002	2.60875
5103	Cfa.14509.1.A1_s_at	0.699779	4.18762
32583	CfaAffx.25390.1.S1_at	0.699491	3.46164
21251	CfaAffx.11498.1.S1_at	0.699232	3.98567
7858	Cfa.17645.2.S1_s_at	0.698598	5.28868
15145	Cfa.5605.1.A1_at	0.696717	5.04435
41218	CfaAffx.7869.1.S1_s_at	0.696051	3.64746
7602	Cfa.17303.1.S1_s_at	0.693926	4.21057
38659	CfaAffx.4636.1.S1_at	0.691492	2.45362
27517	CfaAffx.19131.1.S1_s_at	0.691481	3.60616
26678	CfaAffx.18120.1.S1_at	0.691449	4.17989
11254	Cfa.21347.1.S1_at	0.689827	3.14505
29005	CfaAffx.20933.1.S1_at	0.688554	4.69771
31063	CfaAffx.2354.1.S1_s_at	0.68778	4.09521
38767	CfaAffx.4764.1.S1_s_at	0.687692	3.75571
22596	CfaAffx.13109.1.S1_at	0.68622	4.78154
36990	CfaAffx.30875.1.S1_s_at	0.685967	3.23835
31871	CfaAffx.24563.1.S1_at	0.685894	2.60626
35257	CfaAffx.28690.1.S1_at	0.68533	4.15787
37853	CfaAffx.3659.1.S1_s_at	0.683487	2.8799
34310	CfaAffx.2752.1.S1_at	0.682946	2.74988
22353	CfaAffx.12837.1.S1_at	0.681521	3.53597
33589	CfaAffx.26608.1.S1_at	0.681358	4.88692
29284	CfaAffx.21295.1.S1_at	0.681011	2.44356
38487	CfaAffx.4420.1.S1_s_at	0.679153	3.86359
35353	CfaAffx.28806.1.S1_at	0.678117	2.96903
2052	Cfa.11774.1.S1_at	0.678054	2.63878
28160	CfaAffx.19935.1.S1_s_at	0.67767	3.53069
22669	CfaAffx.13187.1.S1_at	0.677162	4.19405
22934	CfaAffx.13493.1.S1_s_at	0.676937	2.44814
29071	CfaAffx.21007.1.S1_at	0.674736	3.2801
24363	CfaAffx.15287.1.S1_s_at	0.674281	4.32259
21342	CfaAffx.11625.1.S1_at	0.673431	3.21292
6388	Cfa.1567.2.A1_s_at	0.673147	4.4694
11398	Cfa.21543.1.S1_s_at	0.669698	4.69411
33464	CfaAffx.26466.1.S1_at	0.668832	3.54729
12064	Cfa.2688.1.S1_s_at	0.668614	3.0261
11063	Cfa.21128.1.S1_s_at	0.667209	3.52268
40635	CfaAffx.712.1.S1_x_at	0.666896	6.86064
9987	Cfa.19933.1.A1_s_at	0.666867	4.21311
27674	CfaAffx.19330.1.S1_at	0.665429	3.35878
37605	CfaAffx.3351.1.S1_s_at	0.664845	3.46111
40872	CfaAffx.7418.1.S1_s_at	0.664822	5.87325
39584	CfaAffx.5863.1.S1_at	0.663888	4.27376
11442	Cfa.21591.1.S1_at	0.662492	3.84454
14946	Cfa.5430.1.A1_at	0.662057	2.55617
8590	Cfa.18436.1.S1_s_at	0.661631	4.77151
31249	CfaAffx.23784.1.S1_s_at	0.661163	3.99932
2991	Cfa.12556.1.A1_at	0.660472	3.71107
31271	CfaAffx.23812.1.S1_at	0.65954	4.4673
23323	CfaAffx.13996.1.S1_s_at	0.659119	4.98379
3900	Cfa.13381.1.A1_at	0.659002	3.08021
12526	Cfa.3119.1.A1_at	0.658281	5.61657
21767	CfaAffx.1214.1.S1_at	0.658189	4.05319
301	Cfa.10200.1.A1_at	0.657773	4.10941
36993	CfaAffx.30878.1.S1_at	0.657477	3.54355
4143	Cfa.13609.1.A1_s_at	0.655671	4.19765
20153	CfaAffx.10156.1.S1_at	0.654806	5.50284
6258	Cfa.15554.1.A1_at	0.653865	4.06789
15440	Cfa.5879.1.A1_at	0.65353	2.43898
34945	CfaAffx.28282.1.S1_at	0.653391	4.55349
39700	CfaAffx.6000.1.S1_at	0.652755	3.60538
26772	CfaAffx.1824.1.S1_at	0.652605	2.62463
36015	CfaAffx.29636.1.S1_s_at	0.652266	2.98723
7585	Cfa.17283.1.S1_at	0.651918	3.19342
11819	Cfa.2464.1.S1_at	0.651587	5.02031
31398	CfaAffx.23969.1.S1_s_at	0.651027	3.62259
24233	CfaAffx.15140.1.S1_s_at	0.65081	2.85003
2047	Cfa.11769.1.A1_at	0.649386	5.46517
28333	CfaAffx.20138.1.S1_at	0.649226	3.57684
35570	CfaAffx.29097.1.S1_at	0.648743	3.15846
7053	Cfa.16572.1.A1_at	0.646909	5.07446
34242	CfaAffx.27426.1.S1_at	0.646499	3.84055
34992	CfaAffx.28332.1.S1_s_at	0.645002	3.96044
2131	Cfa.1184.1.S1_at	0.644483	5.00874
33373	CfaAffx.26358.1.S1_at	0.644298	3.31024
16974	Cfa.7227.1.A1_s_at	0.644228	6.13626
32508	CfaAffx.25304.1.S1_s_at	0.641804	4.88035
21746	CfaAffx.12115.1.S1_s_at	0.641134	4.6977
8218	Cfa.1802.3.S1_at	0.641067	2.54768
35167	CfaAffx.28574.1.S1_s_at	0.640914	4.34204
2703	Cfa.12316.1.A1_at	0.640598	3.88867
3874	Cfa.13354.1.A1_at	0.638916	4.15704
31106	CfaAffx.23589.1.S1_s_at	0.638022	4.60174
14473	Cfa.5017.1.A1_at	0.636335	3.57686
7818	Cfa.17603.1.S1_at	0.63632	4.16836
16481	Cfa.681.1.A1_at	0.632744	5.06608
10265	Cfa.20198.1.S1_s_at	0.631753	2.88492
42774	CfaAffx.9737.1.S1_at	0.630567	2.88627
28825	CfaAffx.20720.1.S1_at	0.630367	4.9421
8320	Cfa.18149.1.S1_s_at	0.629233	2.4714
29210	CfaAffx.2119.1.S1_s_at	0.62751	3.54837
41006	CfaAffx.7588.1.S1_x_at	0.626775	4.03631
34844	CfaAffx.28156.1.S1_at	0.625732	4.00249
20755	CfaAffx.10890.1.S1_at	0.62563	5.01091
21485	CfaAffx.11815.1.S1_at	0.624868	5.07959
39257	CfaAffx.545.1.S1_at	0.624471	2.56302
35741	CfaAffx.29293.1.S1_s_at	0.623703	4.05383
31550	CfaAffx.24158.1.S1_s_at	0.623219	5.08546
10352	Cfa.20287.1.S1_s_at	0.62222	4.30243
25370	CfaAffx.16527.1.S1_at	0.622003	2.64022
25813	CfaAffx.17049.1.S1_at	0.621619	2.56229
35499	CfaAffx.29009.1.S1_s_at	0.621534	2.43751
14091	Cfa.4679.1.A1_at	0.620481	2.53063
21355	CfaAffx.11647.1.S1_at	0.620279	5.55318
36263	CfaAffx.29930.1.S1_s_at	0.619907	5.0592
38093	CfaAffx.3952.1.S1_s_at	0.619825	4.32705
1639	Cfa.11405.1.A1_at	0.618771	5.44425
29545	CfaAffx.2163.1.S1_at	0.618761	7.91949
37611	CfaAffx.3360.1.S1_at	0.618396	4.08231
11420	Cfa.21566.1.S1_s_at	0.618199	3.83769
36505	CfaAffx.30243.1.S1_at	0.616556	2.43282
20740	CfaAffx.10872.1.S1_at	0.615531	2.46853
15016	Cfa.5493.1.A1_at	0.615256	6.25428
36924	CfaAffx.30792.1.S1_s_at	0.615092	3.06619
4423	Cfa.13868.1.A1_at	0.614975	2.54039
36823	CfaAffx.30659.1.S1_at	0.61496	2.71356
38620	CfaAffx.4597.1.S1_at	0.614871	2.92939
10058	Cfa.19997.1.S1_s_at	0.613455	4.95465
23750	CfaAffx.14565.1.S1_s_at	0.612444	4.03053
131	Cfa.10018.1.A1_s_at	0.611859	5.27175
18020	Cfa.8124.1.A1_a_at	0.61019	2.87253
38373	CfaAffx.4282.1.S1_at	0.609649	4.37629
27526	CfaAffx.19145.1.S1_at	0.609446	3.84315
9853	Cfa.19794.1.S1_s_at	0.608592	3.36442
39983	CfaAffx.6355.1.S1_at	0.608417	4.53209
2147	Cfa.11853.1.A1_at	0.607878	3.98958
9025	Cfa.189.2.S1_s_at	0.606903	3.73946
5724	Cfa.15070.1.A1_at	0.606566	5.032
42947	CfaAffx.9965.1.S1_at	0.606465	4.45508
9655	Cfa.19601.1.S1_s_at	0.605685	4.39343
34086	CfaAffx.27246.1.S1_s_at	0.605472	2.82884
26899	CfaAffx.18390.1.S1_at	0.604559	2.52562
41112	CfaAffx.7731.1.S1_at	0.603093	3.82667
34908	CfaAffx.28233.1.S1_s_at	0.602396	3.12745
42294	CfaAffx.9158.1.S1_s_at	0.602005	3.9463
23047	CfaAffx.13636.1.S1_x_at	0.601798	2.56355
17180	Cfa.7409.1.S1_at	0.601785	4.259
889	Cfa.10723.1.A1_at	0.601531	5.07495
24407	CfaAffx.15336.1.S1_at	0.600987	3.7233
28889	CfaAffx.20792.1.S1_s_at	0.60093	5.38083
30473	CfaAffx.22762.1.S1_s_at	0.600743	4.27833
35625	CfaAffx.2917.1.S1_s_at	0.600165	3.88929
3298	Cfa.12820.2.A1_a_at	0.600116	5.7378
42660	CfaAffx.9592.1.S1_s_at	0.599674	3.26322
23433	CfaAffx.14140.1.S1_s_at	0.599513	2.88236
7696	Cfa.17412.1.S1_s_at	0.599168	5.40012
42794	CfaAffx.9762.1.S1_s_at	0.598992	6.31284
25103	CfaAffx.16198.1.S1_s_at	0.598864	5.72185
30043	CfaAffx.22235.1.S1_at	0.598426	6.32406
18325	Cfa.8383.1.A1_s_at	0.598249	3.48817
24447	CfaAffx.15393.1.S1_at	0.5981	2.92922
20127	CfaAffx.10123.1.S1_at	0.598071	2.97598
3397	Cfa.12905.2.A1_a_at	0.597731	5.09543
32765	CfaAffx.25607.1.S1_s_at	0.597601	5.38781
24377	CfaAffx.15304.1.S1_at	0.597096	3.71093
33672	CfaAffx.26711.1.S1_s_at	0.596639	4.92118
11380	Cfa.21523.1.S1_at	0.596441	4.96935
13482	Cfa.400.1.A1_at	0.596337	4.14431
18748	Cfa.8725.1.A1_at	0.596331	3.28131
7645	Cfa.17350.1.S1_s_at	0.595819	5.03578
743	Cfa.10591.1.A1_at	0.593121	3.05572
24496	CfaAffx.15443.1.S1_s_at	0.592914	3.59521
12894	Cfa.3498.1.S1_at	0.5928	3.97925
10180	Cfa.20119.1.S1_s_at	0.592652	4.46975
13523	Cfa.4072.1.A1_at	0.592429	5.11531
31939	CfaAffx.24651.1.S1_at	0.592022	2.42873
5912	Cfa.15229.1.A1_at	0.590831	3.74796
20579	CfaAffx.10664.1.S1_s_at	0.590336	2.90898
29503	CfaAffx.21576.1.S1_at	0.589847	4.36397
22708	CfaAffx.13224.1.S1_s_at	0.589763	3.84576
25264	CfaAffx.16386.1.S1_s_at	0.589708	2.45498
10613	Cfa.20664.1.S1_s_at	0.58933	4.11164
26454	CfaAffx.17837.1.S1_at	0.58916	2.49536
17382	Cfa.7579.1.A1_at	0.589096	2.66335
37086	CfaAffx.30980.1.S1_s_at	0.589028	4.9364
2891	Cfa.12467.2.A1_a_at	0.588516	6.93043
32771	CfaAffx.25616.1.S1_at	0.587903	6.10713
20618	CfaAffx.1072.1.S1_s_at	0.587495	2.43626
29447	CfaAffx.21496.1.S1_s_at	0.587195	2.82835
27515	CfaAffx.1913.1.S1_s_at	0.587165	5.27386
24735	CfaAffx.1574.1.S1_s_at	0.587115	4.08589
26523	CfaAffx.17929.1.S1_at	0.58683	3.71367
3719	Cfa.13213.1.S1_s_at	0.586717	5.26233
9217	Cfa.1912.1.S1_at	0.586671	4.15655
30710	CfaAffx.23074.1.S1_at	0.586353	4.02936
19597	Cfa.9541.1.A1_at	0.584234	6.26901
27308	CfaAffx.18890.1.S1_at	0.584141	3.26008
10801	Cfa.20870.1.S1_at	0.583966	4.34806
9132	Cfa.19011.1.S1_at	0.583938	3.37819
22129	CfaAffx.12579.1.S1_s_at	0.583391	3.67224
41237	CfaAffx.7893.1.S1_s_at	0.582627	3.17915
34175	CfaAffx.27348.1.S1_at	0.582562	3.2975
5538	Cfa.14905.2.A1_a_at	0.58231	3.53473
22832	CfaAffx.13370.1.S1_at	0.582011	3.55421
31464	CfaAffx.24040.1.S1_at	0.58122	3.73038
3975	Cfa.13453.1.A1_at	0.581198	2.77703
7665	Cfa.17374.1.S1_s_at	0.580729	4.03657
4128	Cfa.13595.1.A1_at	0.579497	5.46714
29006	CfaAffx.20935.1.S1_at	0.579297	4.53604
8322	Cfa.18150.1.S1_s_at	0.578898	3.88177
12547	Cfa.3136.1.A1_s_at	0.578767	2.68345
31532	CfaAffx.2413.1.S1_at	0.578615	4.51012
9993	Cfa.19941.1.S1_s_at	0.578537	5.57805
23609	CfaAffx.14367.1.S1_at	0.57846	2.43221
23450	CfaAffx.14165.1.S1_s_at	0.578392	4.96389
9775	Cfa.19718.1.S1_at	0.577788	6.06846
25312	CfaAffx.16445.1.S1_at	0.577369	5.67442
6281	Cfa.15576.1.A1_at	0.577367	4.26882
17859	Cfa.8.1.S1_s_at	0.576195	5.04288
26170	CfaAffx.17481.1.S1_at	0.576182	6.34677
10095	Cfa.20034.1.S1_at	0.576144	3.13835
9858	Cfa.19798.1.S1_s_at	0.576116	4.18109
24883	CfaAffx.15924.1.S1_at	0.575681	4.85625
31313	CfaAffx.23868.1.S1_s_at	0.574628	3.08427
30821	CfaAffx.23214.1.S1_at	0.574261	4.34105
24437	CfaAffx.15377.1.S1_at	0.574179	5.1688
29207	CfaAffx.21188.1.S1_s_at	0.573644	3.59221
19726	Cfa.9677.1.A1_at	0.573448	2.77437
27094	CfaAffx.18629.1.S1_s_at	0.571769	5.01257
7367	Cfa.17006.1.S1_at	0.570922	5.31963
33061	CfaAffx.25972.1.S1_at	0.570696	3.33849
33035	CfaAffx.25940.1.S1_at	0.569995	3.43264
22424	CfaAffx.12916.1.S1_s_at	0.56943	4.31966
24347	CfaAffx.15265.1.S1_at	0.568556	3.64396
27554	CfaAffx.19186.1.S1_at	0.568145	5.25356
20625	CfaAffx.10730.1.S1_at	0.567476	3.18452
15153	Cfa.5610.2.A1_s_at	0.566757	4.42528
406	Cfa.1030.1.S1_at	0.566107	5.31275
8868	Cfa.18722.1.S1_s_at	0.566003	5.45148
33686	CfaAffx.26727.1.S1_at	0.565672	2.44091
16604	Cfa.6910.1.A1_at	0.565533	4.56232
8887	Cfa.18745.1.S1_s_at	0.565225	4.83232
31159	CfaAffx.23661.1.S1_s_at	0.564455	3.72234
3248	Cfa.12775.1.A1_s_at	0.564421	3.95169
6182	Cfa.15485.1.A1_s_at	0.564337	4.13529
36858	CfaAffx.30696.1.S1_at	0.564243	7.09356
27520	CfaAffx.19134.1.S1_at	0.563399	3.31053
40272	CfaAffx.6712.1.S1_at	0.563204	2.78756
7236	Cfa.16826.1.S1_s_at	0.56282	3.88087
34593	CfaAffx.27877.1.S1_s_at	0.56276	3.57313
8084	Cfa.17883.1.S1_s_at	0.562614	3.84349
27017	CfaAffx.18538.1.S1_at	0.562565	2.80009
25228	CfaAffx.16335.1.S1_at	0.56239	3.5971
23687	CfaAffx.14474.1.S1_s_at	0.562088	3.56862
12608	Cfa.3194.1.A1_at	0.561916	5.92034
39147	CfaAffx.5296.1.S1_at	0.561831	6.63675
9938	Cfa.19878.1.S1_s_at	0.561331	2.77608
36294	CfaAffx.29971.1.S1_s_at	0.560906	3.60359
25816	CfaAffx.17052.1.S1_s_at	0.559777	3.14036
14233	Cfa.4800.1.A1_at	0.559505	3.51586
36824	CfaAffx.30659.1.S1_s_at	0.559259	3.17574
22368	CfaAffx.12852.1.S1_at	0.558728	4.54496
8724	Cfa.18581.1.S1_s_at	0.558421	3.70915
41632	CfaAffx.8359.1.S1_at	0.557791	3.56266
25794	CfaAffx.17026.1.S1_s_at	0.556991	3.39066
20082	CfaAffx.10071.1.S1_s_at	0.556784	4.83237
39843	CfaAffx.6190.1.S1_at	0.556336	5.60066
15630	Cfa.6058.1.A1_at	0.555229	4.73189
2417	Cfa.12079.1.A1_at	0.555181	4.16975
38662	CfaAffx.464.1.S1_at	0.554896	4.61538
38084	CfaAffx.3946.1.S1_at	0.554792	4.50028
27256	CfaAffx.18820.1.S1_at	0.554657	2.70951
8712	Cfa.18571.1.S1_s_at	0.554649	3.7215
26280	CfaAffx.17626.1.S1_s_at	0.554318	3.62222
5044	Cfa.14450.1.A1_at	0.554007	3.60073
30176	CfaAffx.22381.1.S1_s_at	0.553902	5.28748
5640	Cfa.14995.1.A1_at	0.553873	4.31242
4418	Cfa.13863.1.A1_s_at	0.553041	3.20856
7710	Cfa.17427.1.S1_s_at	0.552954	3.44931
9715	Cfa.19661.1.S1_s_at	0.552846	3.17632
15928	Cfa.6331.1.A1_at	0.552772	2.74846
34297	CfaAffx.27500.1.S1_s_at	0.552668	5.00193
8148	Cfa.17950.1.S1_s_at	0.551966	2.9134
8469	Cfa.18312.1.S1_s_at	0.551943	4.75117
7920	Cfa.17725.1.S1_s_at	0.55151	5.97624
34629	CfaAffx.27914.1.S1_s_at	0.550536	4.71846
2578	Cfa.1221.1.S1_s_at	0.550456	2.56433
19490	Cfa.9436.1.A1_at	0.550251	6.48312
7797	Cfa.17582.1.S1_at	0.549969	2.50652
26746	CfaAffx.182.1.S1_at	0.549683	5.15488
27139	CfaAffx.18675.1.S1_s_at	0.54948	3.3441
21847	CfaAffx.12235.1.S1_at	0.549441	3.51952
35063	CfaAffx.28442.1.S1_s_at	0.549339	3.71971
41305	CfaAffx.7975.1.S1_at	0.549189	3.78493
23470	CfaAffx.14184.1.S1_s_at	0.549181	4.86216
29620	CfaAffx.21719.1.S1_s_at	0.548933	4.14824
21072	CfaAffx.1126.1.S1_s_at	0.548524	3.14063
11354	Cfa.21495.1.S1_s_at	0.548254	2.85978
30883	CfaAffx.23298.1.S1_s_at	0.547576	3.83053
40732	CfaAffx.7242.1.S1_at	0.54562	3.26639
12071	Cfa.2697.1.A1_at	0.545457	3.70418
192	Cfa.10089.1.A1_at	0.545271	4.74936
5083	Cfa.14489.1.S1_at	0.544514	3.16094
22881	CfaAffx.13421.1.S1_at	0.543653	3.96095
32230	CfaAffx.24979.1.S1_at	0.543542	4.47522
34790	CfaAffx.28094.1.S1_s_at	0.543333	3.83101
3835	Cfa.13324.1.A1_s_at	0.543266	3.56629
33086	CfaAffx.26000.1.S1_s_at	0.543264	6.71526
15468	Cfa.5903.1.A1_at	0.542097	4.98017
3386	Cfa.12898.1.A1_at	0.542087	5.54129
3852	Cfa.13336.1.A1_at	0.54194	3.78957
11835	Cfa.248.1.S1_at	0.541443	8.23411
226	Cfa.10125.1.S1_s_at	0.541209	3.48088
7066	Cfa.16590.1.S2_at	0.541113	3.46537
11120	Cfa.21180.1.S1_at	0.541068	6.05004
27415	CfaAffx.19024.1.S1_at	0.539658	4.4071
30512	CfaAffx.22813.1.S1_s_at	0.539572	3.56129
9166	Cfa.1905.1.S1_at	0.539057	4.72655
10775	Cfa.20845.1.S1_s_at	0.538921	3.66449
6452	Cfa.15725.1.A1_at	0.538673	3.59867
24893	CfaAffx.15934.1.S1_at	0.538228	3.41988
23912	CfaAffx.14760.1.S1_s_at	0.538124	4.24413
24425	CfaAffx.15359.1.S1_at	0.537898	3.62603
17596	Cfa.7764.1.A1_at	0.537357	2.64855
30108	CfaAffx.22305.1.S1_s_at	0.537214	3.81001
26659	CfaAffx.18098.1.S1_at	0.536661	4.66332
31419	CfaAffx.23991.1.S1_at	0.536642	4.60589
35679	CfaAffx.29229.1.S1_at	0.53663	3.02506
33262	CfaAffx.26221.1.S1_s_at	0.536059	5.0559
20143	CfaAffx.10140.1.S1_at	0.535972	4.39308
6919	Cfa.16387.1.A1_at	0.535731	4.32115
18511	Cfa.8534.1.A1_a_at	0.535263	3.15926
18442	Cfa.8476.1.S1_s_at	0.535075	4.08406
30566	CfaAffx.22896.1.S1_s_at	0.534317	4.1479
16594	Cfa.6902.1.A1_at	0.534159	2.42678
27714	CfaAffx.19379.1.S1_s_at	0.533719	4.57215
27326	CfaAffx.18912.1.S1_s_at	0.533565	4.30719
42006	CfaAffx.8809.1.S1_s_at	0.533517	3.00514
499	Cfa.10386.1.A1_s_at	0.533262	5.0161
40178	CfaAffx.6601.1.S1_x_at	0.532533	6.96844
31042	CfaAffx.23510.1.S1_s_at	0.5324	4.37745
34915	CfaAffx.28245.1.S1_s_at	0.532359	4.75141
23090	CfaAffx.13694.1.S1_s_at	0.531929	4.20297
19265	Cfa.9218.1.A1_at	0.531491	5.24204
41084	CfaAffx.7700.1.S1_s_at	0.531336	2.78544
41463	CfaAffx.8141.1.S1_at	0.53131	3.943
35137	CfaAffx.28542.1.S1_s_at	0.53094	3.27767
42493	CfaAffx.9387.1.S1_at	0.530289	3.90485
42800	CfaAffx.9768.1.S1_s_at	0.530208	5.29521
5855	Cfa.15180.1.S1_at	0.529022	2.87692
1971	Cfa.11704.1.A1_at	0.528754	6.22086
14067	Cfa.4660.1.A1_at	0.528661	5.45351
25365	CfaAffx.16513.1.S1_s_at	0.528168	4.45276
39713	CfaAffx.6012.1.S1_at	0.527865	3.02144
6748	Cfa.16208.1.A1_at	0.52786	4.80154
37199	CfaAffx.31122.1.S1_at	0.527683	4.18293
39379	CfaAffx.5595.1.S1_s_at	0.527638	4.1091
14054	Cfa.465.2.S1_s_at	0.52704	5.26916
7897	Cfa.17697.1.S1_s_at	0.526986	5.1161
26278	CfaAffx.17623.1.S1_s_at	0.526942	3.45973
41207	CfaAffx.7855.1.S1_at	0.52671	5.23898
36903	CfaAffx.30763.1.S1_a_at	0.526612	2.9479
6247	Cfa.15542.1.A1_at	0.526413	2.9107
27062	CfaAffx.18594.1.S1_at	0.526294	2.88379
38768	CfaAffx.4765.1.S1_s_at	0.526058	2.6288
35653	CfaAffx.29200.1.S1_s_at	0.525603	4.70183
3076	Cfa.12624.1.A1_at	0.525162	2.46751
31966	CfaAffx.2469.1.S1_at	0.52504	4.11637
37309	CfaAffx.31247.1.S1_at	0.524242	5.93389
23996	CfaAffx.14849.1.S1_s_at	0.523249	5.32874
26238	CfaAffx.17564.1.S1_s_at	0.522629	5.81112
26566	CfaAffx.17982.1.S1_at	0.522335	2.4617
11397	Cfa.21543.1.S1_a_at	0.522245	4.14479
22893	CfaAffx.13441.1.S1_s_at	0.521741	4.73574
12881	Cfa.3486.1.S1_s_at	0.521593	2.84398
4337	Cfa.13785.1.A1_at	0.521414	3.98542
17419	Cfa.7612.1.A1_at	0.521285	2.46409
14859	Cfa.5356.1.A1_at	0.520665	4.2365
20666	CfaAffx.10783.1.S1_at	0.520172	2.92731
6721	Cfa.16160.1.S1_at	0.520166	4.77951
17936	Cfa.8055.1.A1_s_at	0.520139	6.58773
19173	Cfa.9124.1.A1_at	0.520093	4.3745
22273	CfaAffx.12753.1.S1_at	0.520044	4.26418
40317	CfaAffx.6761.1.S1_s_at	0.519898	3.79523
37646	CfaAffx.3399.1.S1_at	0.519449	3.70825
40400	CfaAffx.6850.1.S1_s_at	0.519033	2.84575
25285	CfaAffx.16414.1.S1_s_at	0.518887	2.42684
14196	Cfa.4771.1.A1_at	0.518267	3.85655
21200	CfaAffx.11437.1.S1_s_at	0.518117	5.66322
6434	Cfa.15711.1.A1_at	0.517567	3.13113
30570	CfaAffx.229.1.S1_at	0.517019	2.5888
6910	Cfa.16376.1.A1_at	0.516803	4.60825
42262	CfaAffx.9108.1.S1_at	0.516796	5.6856
29886	CfaAffx.22033.1.S1_s_at	0.516772	6.52655
10163	Cfa.20100.1.S1_s_at	0.5166	3.22326
40423	CfaAffx.6875.1.S1_at	0.516401	4.32028
9746	Cfa.19693.1.S1_s_at	0.515598	3.06811
3129	Cfa.12668.1.A1_at	0.515076	3.57279
33728	CfaAffx.26780.1.S1_s_at	0.514815	4.14253
9668	Cfa.19614.1.S1_s_at	0.514496	6.10308
16934	Cfa.7195.1.A1_at	0.513731	2.64395
33337	CfaAffx.26307.1.S1_at	0.513496	2.86002
4273	Cfa.13723.1.A1_at	0.513303	5.40118
28506	CfaAffx.20345.1.S1_at	0.511809	2.99993
42884	CfaAffx.9885.1.S1_at	0.511805	3.91911
24037	CfaAffx.14898.1.S1_s_at	0.510873	4.75171
16379	Cfa.6725.1.A1_at	0.510235	4.83325
27430	CfaAffx.1904.1.S1_s_at	0.509806	3.01323
11365	Cfa.21510.1.S1_s_at	0.5098	5.32448
39732	CfaAffx.6051.1.S1_at	0.50954	2.48648
32764	CfaAffx.25606.1.S1_s_at	0.509348	5.05417
8999	Cfa.18875.1.S1_s_at	0.508857	4.07981
42062	CfaAffx.8873.1.S1_s_at	0.508702	4.47759
9018	Cfa.18892.1.S1_s_at	0.508434	5.32285
15672	Cfa.6096.1.A1_at	0.508345	2.88808
39589	CfaAffx.5869.1.S1_s_at	0.508121	5.2999
18506	Cfa.853.1.S1_at	0.507312	2.6414
18698	Cfa.8686.1.A1_at	0.507141	4.09674
24323	CfaAffx.15238.1.S1_at	0.506488	3.28483
22318	CfaAffx.1280.1.S1_at	0.506165	4.70785
32478	CfaAffx.25266.1.S1_at	0.505984	4.24401
31009	CfaAffx.23468.1.S1_s_at	0.505981	5.03741
38346	CfaAffx.4255.1.S1_at	0.505877	2.85696
4369	Cfa.13816.1.A1_at	0.505728	4.32281
8581	Cfa.18425.1.S1_s_at	0.505637	4.56277
41508	CfaAffx.8210.1.S1_at	0.505561	9.11195
29192	CfaAffx.21168.1.S1_s_at	0.504943	4.06202
27995	CfaAffx.19734.1.S1_at	0.504836	5.1426
8577	Cfa.18421.1.S1_s_at	0.504683	4.65162
29962	CfaAffx.22121.1.S1_at	0.504565	3.09145
7608	Cfa.17308.1.S1_s_at	0.504341	6.08058
32124	CfaAffx.24865.1.S1_s_at	0.504266	4.70532
31362	CfaAffx.23927.1.S1_at	0.503575	3.91126
6641	Cfa.1600.1.A1_at	0.502872	2.41387
12412	Cfa.3003.1.A1_at	0.502844	2.75867
29774	CfaAffx.2190.1.S1_at	0.502421	2.47376
42465	CfaAffx.9353.1.S1_s_at	0.501827	4.05807
26154	CfaAffx.17462.1.S1_at	0.501554	3.67072
7997	Cfa.17800.1.S1_at	0.501133	3.14993
26508	CfaAffx.17910.1.S1_s_at	0.500712	4.80945
11741	Cfa.239.1.S1_at	0.499688	3.4814
11363	Cfa.21506.1.S1_s_at	0.499258	4.36306
20581	CfaAffx.10670.1.S1_at	0.499054	3.20491
20998	CfaAffx.11161.1.S1_s_at	0.498913	4.9931
30433	CfaAffx.22707.1.S1_s_at	0.498718	3.10748
2182	Cfa.11883.1.A1_at	0.49851	4.98756
19614	Cfa.9558.1.A1_at	0.497733	6.63321
41160	CfaAffx.7802.1.S1_at	0.497714	2.56485
9163	Cfa.19044.1.S1_at	0.496842	4.86514
10703	Cfa.20764.1.S1_s_at	0.496697	4.18167
42665	CfaAffx.960.1.S1_at	0.496237	3.54004
18949	Cfa.8898.1.S1_at	0.496111	9.79214
10224	Cfa.20159.1.S1_s_at	0.495532	4.17397
10374	Cfa.20308.1.S1_at	0.495468	4.4016
9402	Cfa.19355.1.S1_s_at	0.495403	4.05672
29658	CfaAffx.21761.1.S1_at	0.495224	3.66342
39710	CfaAffx.601.1.S1_s_at	0.494922	3.30695
19001	Cfa.895.1.A1_s_at	0.494805	3.18182
35030	CfaAffx.28395.1.S1_s_at	0.494539	4.95539
12853	Cfa.3460.1.S1_at	0.494433	2.75247
14055	Cfa.465.3.S1_s_at	0.494124	5.59645
10598	Cfa.20638.1.S1_at	0.494078	2.57606
24743	CfaAffx.15746.1.S1_at	0.493865	3.1712
18089	Cfa.8187.1.A1_at	0.493321	5.07872
26240	CfaAffx.17566.1.S1_at	0.493157	3.91682
38063	CfaAffx.3922.1.S1_s_at	0.493079	3.27901
3768	Cfa.13266.1.A1_at	0.492194	2.44087
7843	Cfa.17628.1.S1_at	0.49206	3.35937
33419	CfaAffx.26409.1.S1_at	0.492027	3.04535
38380	CfaAffx.4289.1.S1_s_at	0.491782	5.19761
21755	CfaAffx.12129.1.S1_at	0.491449	3.72023
12848	Cfa.3456.1.S1_s_at	0.491105	3.44403
41005	CfaAffx.7586.1.S1_at	0.491096	3.1645
16528	Cfa.6848.1.A1_a_at	0.490652	2.47058
28630	CfaAffx.20488.1.S1_at	0.49063	2.42028
20047	CfaAffx.10025.1.S1_x_at	0.49013	2.41315
12326	Cfa.2925.1.A1_at	0.49006	2.92753
9309	Cfa.19187.1.S1_at	0.48991	4.88495
8717	Cfa.18576.1.S1_at	0.488312	4.35954
42442	CfaAffx.9314.1.S1_s_at	0.4882	3.3059
29208	CfaAffx.21189.1.S1_at	0.488112	5.92621
39386	CfaAffx.5602.1.S1_s_at	0.487402	3.00294
5304	Cfa.14686.1.A1_at	0.486752	2.69291
41714	CfaAffx.8453.1.S1_at	0.486014	2.96747
21095	CfaAffx.11283.1.S1_at	0.485783	2.6428
7044	Cfa.16560.1.S1_at	0.485753	2.79108
15278	Cfa.5733.1.A1_at	0.485479	3.13801
24058	CfaAffx.14920.1.S1_s_at	0.484953	5.64523
35410	CfaAffx.28892.1.S1_at	0.484826	2.48044
40278	CfaAffx.6717.1.S1_at	0.48424	3.82889
16104	Cfa.6487.1.A1_s_at	0.483343	5.87443
19390	Cfa.9345.2.A1_at	0.483333	4.54027
29338	CfaAffx.21354.1.S1_s_at	0.482989	3.48694
972	Cfa.10795.1.A1_s_at	0.482738	4.69526
32458	CfaAffx.25245.1.S1_s_at	0.482179	2.69112
8456	Cfa.18297.1.S1_at	0.482072	2.50266
28915	CfaAffx.20818.1.S1_s_at	0.481742	9.66706
12122	Cfa.2739.1.A1_at	0.480954	5.60565
27385	CfaAffx.18988.1.S1_at	0.480915	4.33452
24995	CfaAffx.16052.1.S1_at	0.480879	2.96692
24443	CfaAffx.15384.1.S1_s_at	0.480676	4.92399
41248	CfaAffx.7907.1.S1_s_at	0.480476	4.64055
35892	CfaAffx.29487.1.S1_at	0.480431	3.19463
2310	Cfa.11990.1.A1_at	0.480311	4.59522
1012	Cfa.10830.2.A1_s_at	0.479399	5.1852
6285	Cfa.15579.1.A1_s_at	0.479322	4.3619
20051	CfaAffx.10031.1.S1_s_at	0.479246	4.47366
15535	Cfa.5965.1.A1_at	0.478979	4.77063
6546	Cfa.15812.1.S1_at	0.478889	6.26921
7973	Cfa.17776.2.S1_at	0.478865	4.15316
4925	Cfa.14338.1.A1_a_at	0.477361	5.91382
5004	Cfa.14404.1.A1_s_at	0.477026	5.32165
21148	CfaAffx.11360.1.S1_s_at	0.476527	4.72133
8563	Cfa.18405.1.S1_s_at	0.476166	6.41494
4521	Cfa.13965.1.A1_at	0.476065	2.73105
34843	CfaAffx.28155.1.S1_at	0.475827	5.76536
39802	CfaAffx.6146.1.S1_s_at	0.475776	6.12067
31251	CfaAffx.2379.1.S1_at	0.475666	4.46147
7354	Cfa.16993.1.S1_at	0.475439	4.91329
11451	Cfa.216.2.S1_at	0.475255	2.43518
32327	CfaAffx.25088.1.S1_at	0.475144	3.87186
15706	Cfa.613.1.A1_at	0.474882	3.84403
25606	CfaAffx.16814.1.S1_s_at	0.474541	2.71235
4084	Cfa.13556.1.A1_at	0.474208	2.43984
15943	Cfa.6344.1.A1_at	0.474042	5.43112
29124	CfaAffx.21076.1.S1_at	0.473493	2.53759
34293	CfaAffx.27496.1.S1_s_at	0.473372	3.96434
18087	Cfa.8184.1.A1_at	0.473168	4.3823
39015	CfaAffx.5105.1.S1_at	0.472817	3.5818
27119	CfaAffx.18657.1.S1_s_at	0.472711	4.23857
14367	Cfa.4924.1.A1_s_at	0.472616	4.62321
6368	Cfa.15653.1.A1_at	0.472386	3.32184
34417	CfaAffx.27657.1.S1_at	0.472228	4.69022
41470	CfaAffx.8156.1.S1_s_at	0.471875	5.82917
13592	Cfa.4166.1.S1_s_at	0.471574	3.74403
8443	Cfa.1827.1.S1_at	0.471238	3.25069
31927	CfaAffx.24627.1.S1_at	0.471063	2.41271
30932	CfaAffx.23350.1.S1_at	0.470557	2.82429
25471	CfaAffx.1666.1.S1_at	0.470387	4.06475
39166	CfaAffx.5322.1.S1_s_at	0.469687	3.8537
36674	CfaAffx.30470.1.S1_s_at	0.46848	3.5238
22520	CfaAffx.13027.1.S1_s_at	0.468154	4.94158
37100	CfaAffx.31000.1.S1_s_at	0.468129	2.42956
16670	Cfa.6967.1.A1_at	0.467744	2.9418
10815	Cfa.20887.1.S1_s_at	0.467664	3.70836
34289	CfaAffx.27492.1.S1_s_at	0.467539	2.57281
34369	CfaAffx.27596.1.S1_s_at	0.467146	2.40792
15926	Cfa.633.1.S1_at	0.466959	4.4776
25137	CfaAffx.1623.1.S1_s_at	0.466851	4.41809
16350	Cfa.67.1.S1_s_at	0.466608	3.04568
6064	Cfa.15377.1.A1_s_at	0.466575	3.89729
40093	CfaAffx.6490.1.S1_s_at	0.466526	3.48997
29882	CfaAffx.2203.1.S1_at	0.466472	2.62348
31678	CfaAffx.24310.1.S1_at	0.466338	3.20313
17403	Cfa.7599.1.A1_at	0.466295	2.41797
8114	Cfa.17911.1.S1_s_at	0.465446	5.86583
40799	CfaAffx.7340.1.S1_at	0.465237	3.66712
23526	CfaAffx.14252.1.S1_at	0.464526	5.70028
10042	Cfa.19983.2.A1_at	0.464364	3.81748
39481	CfaAffx.5724.1.S1_at	0.464174	4.15664
8867	Cfa.18721.1.S1_s_at	0.464164	5.53577
42578	CfaAffx.9507.1.S1_at	0.464023	2.9407
6016	Cfa.15326.2.S1_at	0.463796	3.69732
14197	Cfa.4771.2.A1_a_at	0.463778	5.33392
9278	Cfa.19165.1.S1_s_at	0.462854	5.96295
26780	CfaAffx.18249.1.S1_s_at	0.462443	4.32265
37830	CfaAffx.3629.1.S1_at	0.461821	7.43443
8361	Cfa.18188.1.S1_s_at	0.461817	6.73155
4993	Cfa.14397.1.S1_at	0.461645	6.47025
12104	Cfa.2724.2.A1_a_at	0.461599	5.4353
28026	CfaAffx.19773.1.S1_s_at	0.46128	5.67353
42960	CfaAffx.9985.1.S1_at	0.461273	3.48828
35828	CfaAffx.29389.1.S1_s_at	0.461215	5.51838
11311	Cfa.2141.1.A1_at	0.461105	2.70453
8065	Cfa.17862.1.S1_s_at	0.460961	3.79629
8986	Cfa.18852.1.S1_s_at	0.460944	7.59871
26521	CfaAffx.17926.1.S1_at	0.460859	5.03132
29854	CfaAffx.220.1.S1_at	0.460594	2.40683
23771	CfaAffx.14587.1.S1_at	0.460407	5.46272
5839	Cfa.15167.2.A1_at	0.460349	5.07486
41106	CfaAffx.7726.1.S1_s_at	0.460239	4.5428
27295	CfaAffx.18877.1.S1_at	0.459943	4.54579
22644	CfaAffx.13158.1.S1_s_at	0.459618	6.53709
8513	Cfa.18354.1.S1_s_at	0.459072	5.56641
39384	CfaAffx.5601.1.S1_at	0.458928	4.17903
9178	Cfa.19071.1.S1_s_at	0.45825	5.07292
4331	Cfa.13779.1.A1_at	0.45824	4.29167
5917	Cfa.15233.1.A1_at	0.45804	5.07322
39747	CfaAffx.6072.1.S1_at	0.457282	2.68923
34361	CfaAffx.2759.1.S1_at	0.456927	6.00763
36484	CfaAffx.30218.1.S1_at	0.45675	2.62096
23304	CfaAffx.13975.1.S1_at	0.456554	5.58355
6653	Cfa.16026.1.S1_at	0.456404	5.11437
28089	CfaAffx.19852.1.S1_s_at	0.456158	3.78094
15826	Cfa.6239.1.A1_at	0.45603	3.56321
18464	Cfa.8494.1.A1_at	0.455942	3.61914
37588	CfaAffx.3331.1.S1_at	0.455938	4.58162
9693	Cfa.19638.1.S1_s_at	0.455889	2.87765
17834	Cfa.7974.1.S1_at	0.455836	3.72304
6336	Cfa.15622.1.A1_s_at	0.455525	3.45303
4180	Cfa.13640.1.A1_at	0.454937	3.39102
38830	CfaAffx.4845.1.S1_at	0.454917	6.27952
7455	Cfa.17122.1.S1_at	0.454512	2.70522
30407	CfaAffx.22675.1.S1_at	0.454511	5.32961
39967	CfaAffx.6339.1.S1_at	0.4543	3.90171
4467	Cfa.13910.1.A1_at	0.454033	4.39193
31119	CfaAffx.23605.1.S1_x_at	0.454029	3.10525
8920	Cfa.18777.1.S1_s_at	0.453872	6.45554
7707	Cfa.17424.1.S1_s_at	0.453859	3.21648
8672	Cfa.18523.1.S1_s_at	0.453803	5.05591
8665	Cfa.18518.1.S1_at	0.453794	3.47452
23783	CfaAffx.14596.1.S1_x_at	0.453665	2.40717
9088	Cfa.18966.1.S1_s_at	0.45353	5.17486
10820	Cfa.20891.1.S1_at	0.453158	6.25751
7720	Cfa.17439.1.S1_at	0.452884	5.41993
28617	CfaAffx.20471.1.S1_at	0.452781	4.86464
27661	CfaAffx.19310.1.S1_s_at	0.45272	3.38718
15715	Cfa.614.1.S1_at	0.452666	2.72496
10558	Cfa.20573.1.S1_x_at	0.452647	4.75657
9800	Cfa.19743.1.S1_s_at	0.452498	5.34914
29990	CfaAffx.22162.1.S1_at	0.452381	3.22839
711	Cfa.10566.3.A1_at	0.452254	3.37667
39572	CfaAffx.5845.1.S1_at	0.452085	4.39478
41023	CfaAffx.7609.1.S1_s_at	0.452046	3.97022
1518	Cfa.11299.1.S1_at	0.451955	8.87487
37839	CfaAffx.3641.1.S1_s_at	0.451895	2.56346
18519	Cfa.8538.1.A1_s_at	0.45165	2.67512
7724	Cfa.17441.1.S1_s_at	0.451389	3.61026
22935	CfaAffx.13495.1.S1_s_at	0.451106	3.75975
40603	CfaAffx.7080.1.S1_s_at	0.450998	5.24936
41831	CfaAffx.8594.1.S1_s_at	0.450797	3.83717
39000	CfaAffx.5089.1.S1_at	0.450541	4.81764
7912	Cfa.17717.1.S1_at	0.450365	2.57385
2841	Cfa.12423.2.A1_at	0.450151	3.42402
19611	Cfa.9556.1.A1_at	0.450055	5.65428
3023	Cfa.12582.1.A1_at	0.449443	2.88585
22303	CfaAffx.12786.1.S1_at	0.449429	2.41529
23532	CfaAffx.14260.1.S1_s_at	0.449405	5.19774
5490	Cfa.14868.1.A1_at	0.449339	3.64184
13002	Cfa.3592.2.S1_at	0.449288	2.5562
36777	CfaAffx.30605.1.S1_s_at	0.448999	5.8586
17447	Cfa.764.1.S1_at	0.448708	6.30903
12417	Cfa.3007.1.A1_at	0.448692	5.11914
41221	CfaAffx.7872.1.S1_at	0.448663	3.33216
38169	CfaAffx.4049.1.S1_at	0.447901	3.0143
23380	CfaAffx.1407.1.S1_s_at	0.44774	4.17012
360	Cfa.10254.1.A1_at	0.447726	5.10297
15875	Cfa.6278.1.S1_at	0.447478	8.58058
17940	Cfa.8056.1.A1_a_at	0.447373	2.91251
32265	CfaAffx.25021.1.S1_at	0.446867	4.15543
22655	CfaAffx.13168.1.S1_at	0.446426	4.25054
23266	CfaAffx.13932.1.S1_at	0.446261	5.03177
13174	Cfa.3736.1.S1_s_at	0.446102	3.92946
38319	CfaAffx.4220.1.S1_at	0.444846	4.91249
38476	CfaAffx.4410.1.S1_at	0.44473	3.20189
23946	CfaAffx.14796.1.S1_at	0.444612	2.89361
20868	CfaAffx.11017.1.S1_at	0.44455	3.34405
13356	Cfa.3878.1.S1_at	0.444337	6.37054
437	Cfa.10328.1.A1_s_at	0.444252	5.31984
34227	CfaAffx.27408.1.S1_s_at	0.444102	4.643
31712	CfaAffx.24358.1.S1_s_at	0.444024	3.46928
21824	CfaAffx.12212.1.S1_at	0.443958	3.95329
6556	Cfa.15823.1.S1_at	0.443647	5.72324
7878	Cfa.17673.1.S1_s_at	0.443076	5.95549
19211	Cfa.9161.1.S1_at	0.442872	5.43012
8455	Cfa.18295.1.S1_s_at	0.441936	7.03766
24458	CfaAffx.15400.1.S1_at	0.441347	3.09919
31501	CfaAffx.24089.1.S1_at	0.441318	4.7704
31743	CfaAffx.24390.1.S1_at	0.440802	5.38791
6166	Cfa.15471.1.A1_at	0.440613	2.87189
27253	CfaAffx.18819.1.S1_s_at	0.440375	4.15665
8001	Cfa.17803.1.S1_s_at	0.440139	2.99058
3972	Cfa.13449.1.A1_s_at	0.439913	4.29635
25159	CfaAffx.16253.1.S1_at	0.439676	3.93882
12942	Cfa.3544.1.S2_at	0.439651	5.51109
23154	CfaAffx.13786.1.S1_at	0.43921	4.4411
40316	CfaAffx.6761.1.S1_at	0.438835	2.85359
38604	CfaAffx.4575.1.S1_s_at	0.43851	3.81019
2083	Cfa.11800.1.A1_s_at	0.43766	5.5956
25566	CfaAffx.16774.1.S1_s_at	0.437605	4.41494
4158	Cfa.13620.2.A1_s_at	0.437601	8.25547
39431	CfaAffx.5668.1.S1_s_at	0.437511	6.29239
2024	Cfa.11750.1.A1_s_at	0.437426	4.46922
30449	CfaAffx.22733.1.S1_s_at	0.437295	4.87499
38617	CfaAffx.4592.1.S1_at	0.437195	2.53812
24505	CfaAffx.15455.1.S1_s_at	0.437152	4.5919
23935	CfaAffx.14783.1.S1_s_at	0.436885	4.72213
16843	Cfa.7116.1.A1_at	0.436855	3.08845
32557	CfaAffx.25362.1.S1_at	0.436431	5.82793
35440	CfaAffx.28940.1.S1_at	0.436013	3.11973
35255	CfaAffx.28688.1.S1_at	0.435817	2.54536
7013	Cfa.1651.1.A1_at	0.435599	4.92228
30583	CfaAffx.22921.1.S1_at	0.435532	4.6848
18691	Cfa.868.1.S1_s_at	0.435318	7.83282
20207	CfaAffx.10219.1.S1_at	0.434241	2.70804
716	Cfa.1057.1.A1_at	0.434134	5.78001
23627	CfaAffx.14394.1.S1_at	0.434115	2.53066
20228	CfaAffx.10245.1.S1_at	0.433885	3.2565
38480	CfaAffx.4414.1.S1_at	0.433592	4.69746
14105	Cfa.4689.1.A1_at	0.433556	3.17463
4980	Cfa.14385.1.S1_s_at	0.433268	5.00217
5868	Cfa.15191.1.S1_at	0.433141	5.29092
38841	CfaAffx.487.1.S1_at	0.433011	2.60863
31514	CfaAffx.24101.1.S1_s_at	0.432788	5.96443
32767	CfaAffx.25609.1.S1_s_at	0.432547	4.90082
11331	Cfa.21470.1.S1_s_at	0.432283	5.13729
42439	CfaAffx.9311.1.S1_s_at	0.431902	4.51781
40511	CfaAffx.6977.1.S1_at	0.431866	2.68818
10950	Cfa.21008.1.S1_s_at	0.431863	5.58173
23585	CfaAffx.14331.1.S1_at	0.431761	4.22749
28117	CfaAffx.19882.1.S1_at	0.431449	2.58134
8302	Cfa.18132.1.S1_at	0.431311	5.33491
34006	CfaAffx.27134.1.S1_at	0.430647	3.94238
22316	CfaAffx.12799.1.S1_s_at	0.430263	4.82755
8248	Cfa.18065.1.S1_s_at	0.430241	3.19042
33129	CfaAffx.26063.1.S1_at	0.430044	5.60636
27025	CfaAffx.18548.1.S1_s_at	0.429872	2.90519
8851	Cfa.18707.1.S1_s_at	0.429487	2.96697
9474	Cfa.19434.1.S1_s_at	0.42941	5.54204
27339	CfaAffx.18931.1.S1_at	0.429304	4.93392
30277	CfaAffx.22508.1.S1_s_at	0.429297	4.8533
32715	CfaAffx.25540.1.S1_s_at	0.429112	6.69189
12435	Cfa.3029.1.A1_at	0.429064	6.03154
24288	CfaAffx.15202.1.S1_s_at	0.428987	6.23778
31468	CfaAffx.24044.1.S1_at	0.428931	5.34154
30897	CfaAffx.23308.1.S1_at	0.428862	2.63459
28895	CfaAffx.20799.1.S1_at	0.428825	4.85408
22394	CfaAffx.12883.1.S1_s_at	0.428757	3.05171
27986	CfaAffx.19717.1.S1_s_at	0.42856	5.99653
28499	CfaAffx.20338.1.S1_at	0.428558	2.79913
8532	Cfa.18370.1.S1_s_at	0.428513	4.36604
40180	CfaAffx.6603.1.S1_at	0.428116	3.89572
9442	Cfa.19403.1.S1_s_at	0.427122	7.69054
39612	CfaAffx.5895.1.S1_at	0.426671	5.76501
30937	CfaAffx.23356.1.S1_s_at	0.42645	4.33188
37559	CfaAffx.3293.1.S1_s_at	0.42611	5.26031
28313	CfaAffx.20116.1.S1_at	0.426012	4.10792
25646	CfaAffx.16862.1.S1_s_at	0.425878	5.1345
38279	CfaAffx.4170.1.S1_at	0.425163	2.40092
34134	CfaAffx.27301.1.S1_s_at	0.425017	9.04428
37690	CfaAffx.3454.1.S1_at	0.424636	2.92533
9506	Cfa.19466.1.S1_s_at	0.424156	3.31065
5774	Cfa.15110.1.A1_at	0.424138	3.46089
10954	Cfa.21013.1.S1_s_at	0.423939	5.45247
13540	Cfa.4098.1.S1_s_at	0.423754	4.2723
24721	CfaAffx.15721.1.S1_x_at	0.423192	2.99207
25696	CfaAffx.1692.1.S1_s_at	0.422842	4.22334
16078	Cfa.6460.1.A1_at	0.422764	6.61373
23523	CfaAffx.14248.1.S1_s_at	0.422631	3.15239
40275	CfaAffx.6715.1.S1_at	0.422198	4.20887
31177	CfaAffx.2369.1.S1_s_at	0.422117	7.70898
6554	Cfa.1582.1.A1_at	0.42203	3.99194
8112	Cfa.1791.1.A1_s_at	0.421921	4.84781
258	Cfa.10159.1.S1_at	0.421867	2.4195
38753	CfaAffx.4748.1.S1_at	0.421305	4.47896
28890	CfaAffx.20793.1.S1_at	0.42119	4.2225
21682	CfaAffx.12034.1.S1_at	0.421079	3.07826
12575	Cfa.3166.1.S1_at	0.421058	3.71763
9737	Cfa.19684.1.S1_s_at	0.420925	4.33045
5632	Cfa.14989.2.A1_at	0.420864	4.21398
24069	CfaAffx.14936.1.S1_at	0.420525	2.72356
35349	CfaAffx.28801.1.S1_s_at	0.420111	4.31924
6058	Cfa.15371.1.A1_at	0.420066	3.83309
19466	Cfa.9416.1.A1_at	0.42005	3.38254
34876	CfaAffx.2819.1.S1_at	0.420023	2.52319
23613	CfaAffx.1437.1.S1_at	0.419929	4.80451
33837	CfaAffx.26924.1.S1_at	0.419877	2.68153
30232	CfaAffx.22443.1.S1_at	0.419565	5.2001
9251	Cfa.19148.1.S1_s_at	0.419487	7.01545
28700	CfaAffx.20577.1.S1_s_at	0.419329	5.65256
39175	CfaAffx.5340.1.S1_at	0.419086	5.20252
26216	CfaAffx.1754.1.S1_s_at	0.418726	3.33407
2634	Cfa.12255.1.A1_at	0.418672	5.07994
36715	CfaAffx.30529.1.S1_s_at	0.418598	3.79288
13575	Cfa.4146.1.A1_x_at	0.418459	3.3946
23278	CfaAffx.13947.1.S1_at	0.418251	2.54272
20364	CfaAffx.104.1.S1_at	0.418177	3.27479
2930	Cfa.12501.1.A1_at	0.418135	11.6538
34164	CfaAffx.27337.1.S1_at	0.417834	3.95798
8166	Cfa.17968.1.S1_s_at	0.417514	5.16868
31883	CfaAffx.2458.1.S1_at	0.417513	5.02709
23615	CfaAffx.14372.1.S1_at	0.41712	3.45901
12611	Cfa.3200.1.S1_at	0.416871	4.38571
36122	CfaAffx.29762.1.S1_at	0.416792	6.95494
13398	Cfa.3911.1.S1_s_at	0.416741	3.92974
23092	CfaAffx.13696.1.S1_at	0.416461	2.87094
14627	Cfa.5158.1.A1_at	0.416076	2.50897
5941	Cfa.15249.1.A1_at	0.415804	2.76514
36495	CfaAffx.30230.1.S1_s_at	0.415675	4.2431
30563	CfaAffx.2289.1.S1_at	0.415641	4.85307
36006	CfaAffx.2963.1.S1_at	0.415511	3.67725
6440	Cfa.15716.1.A1_at	0.415438	4.00258
4159	Cfa.13621.1.A1_at	0.414861	4.62244
37751	CfaAffx.3526.1.S1_s_at	0.414708	2.54794
20628	CfaAffx.10735.1.S1_at	0.414567	5.57918
32890	CfaAffx.25750.1.S1_at	0.41448	4.33781
27740	CfaAffx.19408.1.S1_s_at	0.414343	3.36887
34674	CfaAffx.27961.1.S1_s_at	0.413708	3.12038
9292	Cfa.19175.1.A1_at	0.413532	3.64789
7223	Cfa.16806.1.S1_at	0.413286	2.61261
11132	Cfa.21192.1.S1_s_at	0.41326	3.51427
31805	CfaAffx.24461.1.S1_s_at	0.41325	2.96603
23425	CfaAffx.14131.1.S1_at	0.413219	4.24166
17060	Cfa.7305.1.A1_s_at	0.413172	7.61447
14420	Cfa.4969.1.A1_at	0.413003	3.19291
11724	Cfa.2375.1.A1_at	0.412887	3.72604
25486	CfaAffx.16680.1.S1_s_at	0.412849	3.40193
28826	CfaAffx.20721.1.S1_s_at	0.412596	4.75753
39418	CfaAffx.5654.1.S1_at	0.412357	4.25917
32066	CfaAffx.24815.1.S1_at	0.412353	2.76439
18952	Cfa.89.1.S1_at	0.412149	3.19308
21467	CfaAffx.11792.1.S1_s_at	0.411797	5.90372
2928	Cfa.1250.1.S1_at	0.411762	2.52456
35114	CfaAffx.28514.1.S1_at	0.411152	4.23347
40401	CfaAffx.6852.1.S1_s_at	0.410895	3.04309
16190	Cfa.6566.1.A1_at	0.410077	2.96112
24542	CfaAffx.155.1.S1_at	0.409842	2.40012
23654	CfaAffx.14427.1.S1_s_at	0.409438	2.98816
42967	CfaAffx.9993.1.S1_at	0.408559	2.5117
31679	CfaAffx.24311.1.S1_at	0.408491	2.57558
34971	CfaAffx.28314.1.S1_at	0.408068	4.11975
39712	CfaAffx.6011.1.S1_at	0.40806	4.3757
28359	CfaAffx.20169.1.S1_at	0.407768	4.16221
22986	CfaAffx.13565.1.S1_at	0.407644	2.41714
24216	CfaAffx.15121.1.S1_at	0.406977	6.8973
30031	CfaAffx.2222.1.S1_at	0.406871	2.73694
30706	CfaAffx.23070.1.S1_at	0.406741	2.4102
34471	CfaAffx.27726.1.S1_s_at	0.406621	3.71379
23036	CfaAffx.13622.1.S1_at	0.406367	2.83039
20273	CfaAffx.10288.1.S1_at	0.406062	3.69281
3272	Cfa.12796.1.A1_at	0.405924	5.40538
7265	Cfa.16864.1.S1_at	0.405871	3.22908
20450	CfaAffx.1050.1.S1_at	0.405817	3.05586
7508	Cfa.17186.1.S1_s_at	0.405729	6.95711
19157	Cfa.9108.1.A1_a_at	0.4055	3.89664
12752	Cfa.3348.1.A1_s_at	0.404991	6.26695
18143	Cfa.824.1.S1_at	0.404807	2.84491
7697	Cfa.17414.1.S1_at	0.404688	4.0469
23214	CfaAffx.1386.1.S1_at	0.404379	3.45699
22719	CfaAffx.13236.1.S1_at	0.404293	4.27421
11355	Cfa.21498.1.S1_s_at	0.40428	3.63638
6868	Cfa.16338.1.S1_s_at	0.404273	4.6442
28252	CfaAffx.20047.1.S1_at	0.404188	4.39639
22120	CfaAffx.12564.1.S1_at	0.404118	3.20054
25357	CfaAffx.16501.1.S1_s_at	0.403813	3.65727
5543	Cfa.14908.1.A1_s_at	0.40377	6.3857
9802	Cfa.19744.1.S1_at	0.403621	3.28227
2657	Cfa.12275.1.A1_at	0.403539	3.21057
21494	CfaAffx.11827.1.S1_at	0.403508	5.68397
5973	Cfa.15283.1.A1_at	0.403489	4.55714
37958	CfaAffx.3789.1.S1_s_at	0.402984	4.67022
32334	CfaAffx.25100.1.S1_s_at	0.402972	4.35216
24414	CfaAffx.15343.1.S1_s_at	0.402715	4.32052
36827	CfaAffx.30663.1.S1_at	0.402627	5.58517
40346	CfaAffx.6790.1.S1_at	0.402621	5.17454
8774	Cfa.18635.1.S1_at	0.402612	6.3226
15794	Cfa.6212.1.A1_at	0.402598	8.09942
32325	CfaAffx.25086.1.S1_at	0.402513	2.55482
22639	CfaAffx.13153.1.S1_x_at	0.402435	3.24025
4678	Cfa.14101.1.A1_at	0.402215	4.39682
36324	CfaAffx.29998.1.S1_s_at	0.402108	3.99194
36962	CfaAffx.30842.1.S1_at	0.401975	5.36189
18572	Cfa.8582.1.A1_s_at	0.401794	3.36473
27327	CfaAffx.18914.1.S1_at	0.401769	4.1545
39297	CfaAffx.550.1.S1_x_at	0.401659	4.92664
25085	CfaAffx.16169.1.S1_at	0.401559	2.40814
8756	Cfa.18611.1.S1_s_at	0.401344	2.4478
34947	CfaAffx.28284.1.S1_at	0.401195	6.17515
10944	Cfa.21005.1.S1_at	0.401116	5.76691
38134	CfaAffx.4010.1.S1_s_at	0.401008	3.12872
24204	CfaAffx.15108.1.S1_at	0.400968	3.44554
11388	Cfa.21533.1.S1_s_at	0.400907	3.67431
19715	Cfa.9667.1.A1_at	0.400756	4.53751
34018	CfaAffx.27149.1.S1_at	0.400702	3.90369
8271	Cfa.181.1.S1_at	0.400576	3.9621
37223	CfaAffx.31159.1.S1_s_at	0.400558	2.51461
23809	CfaAffx.14627.1.S1_s_at	0.400465	3.25921
14578	Cfa.5113.1.A1_at	0.400281	5.25881
24950	CfaAffx.16002.1.S1_at	0.40015	4.71178
23586	CfaAffx.14334.1.S1_s_at	0.400095	3.60615
28237	CfaAffx.20033.1.S1_at	0.400034	2.72069
29329	CfaAffx.21343.1.S1_at	0.400024	3.68385
7049	Cfa.1657.1.S1_at	0.399959	3.93373
25789	CfaAffx.17022.1.S1_at	0.399823	6.45135
8873	Cfa.18727.1.S1_at	0.399443	5.77878
6031	Cfa.15344.1.A1_at	0.399324	2.48651
24969	CfaAffx.16023.1.S1_at	0.399135	5.48686
28065	CfaAffx.19822.1.S1_s_at	0.39903	7.89186
20874	CfaAffx.11025.1.S1_at	0.398963	2.56065
29352	CfaAffx.21371.1.S1_s_at	0.398777	3.40202
36132	CfaAffx.29771.1.S1_at	0.398715	2.40131
35069	CfaAffx.2845.1.S1_at	0.398689	3.54351
31552	CfaAffx.24161.1.S1_s_at	0.398654	5.21384
7834	Cfa.17619.1.S1_s_at	0.398609	3.41076
6201	Cfa.15501.1.A1_at	0.398559	5.02857
35189	CfaAffx.28599.1.S1_s_at	0.398164	3.47125
13403	Cfa.3916.1.S1_s_at	0.398011	4.70648
10183	Cfa.20121.1.S1_at	0.397948	7.21005
13323	Cfa.3849.1.S1_s_at	0.397681	4.60463
22299	CfaAffx.12780.1.S1_at	0.397394	5.96139
35687	CfaAffx.29235.1.S1_s_at	0.397354	2.98894
16450	Cfa.6784.1.A1_at	0.397118	5.49497
15101	Cfa.5568.1.A1_at	0.396996	4.11068
12298	Cfa.2896.1.S1_at	0.396982	5.88877
20018	Cfa.999.1.A1_at	0.396928	9.68891
27458	CfaAffx.19068.1.S1_at	0.396744	8.45697
20870	CfaAffx.11019.1.S1_at	0.3966	2.71747
33704	CfaAffx.26749.1.S1_at	0.396457	2.39776
20417	CfaAffx.10457.1.S1_at	0.395974	3.24631
39330	CfaAffx.5539.1.S1_at	0.395915	3.00268
19506	Cfa.9452.1.S1_at	0.395375	8.2427
13968	Cfa.4579.1.S1_s_at	0.395126	6.75859
5508	Cfa.14886.2.A1_at	0.395106	4.82312
16522	Cfa.6843.1.A1_s_at	0.394742	6.40173
28058	CfaAffx.19817.1.S1_at	0.394677	2.41692
29516	CfaAffx.21590.1.S1_at	0.394662	4.68907
6528	Cfa.15790.1.A1_at	0.394636	5.46974
37179	CfaAffx.31093.1.S1_at	0.394585	4.53027
3208	Cfa.12739.1.A1_at	0.394523	2.58187
28161	CfaAffx.19936.1.S1_at	0.394517	7.21578
2189	Cfa.11889.1.A1_at	0.394477	3.0103
22518	CfaAffx.13025.1.S1_at	0.394203	5.9299
7890	Cfa.1769.1.S1_at	0.394154	5.54291
27935	CfaAffx.19657.1.S1_at	0.393937	2.42614
35032	CfaAffx.28397.1.S1_s_at	0.393707	3.99134
36182	CfaAffx.29827.1.S1_s_at	0.393647	2.76294
11954	Cfa.2585.1.A1_at	0.393621	4.50469
10911	Cfa.20976.1.S1_at	0.393563	3.16521
36793	CfaAffx.30629.1.S1_at	0.393373	2.42394
25205	CfaAffx.16308.1.S1_s_at	0.393288	4.78628
33332	CfaAffx.263.1.S1_at	0.393246	5.66281
29983	CfaAffx.22153.1.S1_s_at	0.393064	3.04398
35573	CfaAffx.29099.1.S1_s_at	0.392977	3.2219
40926	CfaAffx.748.1.S1_s_at	0.392744	4.08471
34697	CfaAffx.27989.1.S1_s_at	0.392366	3.52281
20099	CfaAffx.10097.1.S1_s_at	0.392339	3.03268
35692	CfaAffx.29241.1.S1_s_at	0.392302	4.38211
26814	CfaAffx.18291.1.S1_at	0.392026	5.20837
9928	Cfa.19867.1.S1_s_at	0.392012	2.65245
11697	Cfa.2351.1.S1_at	0.391897	4.24141
30302	CfaAffx.22541.1.S1_s_at	0.391879	5.45759
29507	CfaAffx.21581.1.S1_at	0.39184	2.46379
10976	Cfa.21031.1.S1_s_at	0.391749	5.24018
39081	CfaAffx.5199.1.S1_s_at	0.391658	4.91171
17250	Cfa.747.1.A1_at	0.391637	2.92049
6793	Cfa.16253.1.S1_at	0.39151	3.50752
17210	Cfa.7435.1.A1_at	0.391441	2.83843
40364	CfaAffx.681.1.S1_at	0.391413	3.23511
22629	CfaAffx.13143.1.S1_s_at	0.391326	3.13216
9653	Cfa.196.1.S1_s_at	0.391069	3.03829
9082	Cfa.18960.1.S1_s_at	0.390995	4.90797
36056	CfaAffx.29680.1.S1_at	0.390641	6.2205
8499	Cfa.18339.1.S1_s_at	0.390621	4.57467
16562	Cfa.6877.1.A1_s_at	0.390552	2.96395
10921	Cfa.20985.1.S1_s_at	0.390298	6.81716
40164	CfaAffx.6581.1.S1_s_at	0.389713	3.46361
33637	CfaAffx.26669.1.S1_at	0.38969	4.02285
12989	Cfa.358.1.S1_at	0.38967	4.6451
158	Cfa.10051.1.A1_at	0.389616	2.77712
30488	CfaAffx.22780.1.S1_s_at	0.389158	2.72097
18536	Cfa.8553.1.A1_at	0.389142	4.02046
28699	CfaAffx.20576.1.S1_at	0.389112	2.87084
29968	CfaAffx.22126.1.S1_s_at	0.389076	3.16111
22174	CfaAffx.12630.1.S1_at	0.3888	3.05125
41163	CfaAffx.7805.1.S1_s_at	0.388754	5.93182
20819	CfaAffx.10960.1.S1_s_at	0.388682	4.60052
20098	CfaAffx.10097.1.S1_at	0.388644	2.90834
31326	CfaAffx.23889.1.S1_s_at	0.388474	5.58366
28770	CfaAffx.2067.1.S1_s_at	0.388416	5.11982
2313	Cfa.11993.1.S1_at	0.388165	5.0964
2715	Cfa.12329.1.A1_at	0.387974	2.57899
4528	Cfa.13970.1.S1_at	0.387927	5.17142
26499	CfaAffx.17900.1.S1_at	0.387875	7.5171
27883	CfaAffx.19594.1.S1_at	0.387675	8.07981
16169	Cfa.6547.1.A1_at	0.387447	3.3727
26735	CfaAffx.18186.1.S1_at	0.387325	2.39681
3444	Cfa.12951.1.A1_at	0.387259	2.95077
39222	CfaAffx.5397.1.S1_at	0.387162	4.18191
21701	CfaAffx.12058.1.S1_s_at	0.387151	4.65696
38526	CfaAffx.4480.1.S1_at	0.387127	2.92256
15087	Cfa.5555.1.A1_at	0.386833	6.65184
10880	Cfa.20944.2.S1_a_at	0.386299	2.40118
18808	Cfa.8772.1.A1_a_at	0.386292	3.55458
29106	CfaAffx.21051.1.S1_x_at	0.386232	5.15666
23944	CfaAffx.14794.1.S1_at	0.386184	4.42093
5024	Cfa.14425.1.S1_at	0.386138	4.90376
26854	CfaAffx.18337.1.S1_at	0.385982	5.84429
20132	CfaAffx.10129.1.S1_at	0.385583	5.5225
2120	Cfa.11832.2.A1_x_at	0.385487	4.50926
11361	Cfa.21504.1.S1_s_at	0.385066	2.67804
3323	Cfa.12840.1.A1_at	0.384901	3.6508
6499	Cfa.15766.1.S1_s_at	0.384705	5.67475
41523	CfaAffx.8229.1.S1_at	0.384581	4.96921
15548	Cfa.5978.1.A1_at	0.384544	2.70449
20802	CfaAffx.10943.1.S1_at	0.384532	4.24197
31305	CfaAffx.23852.1.S1_s_at	0.384497	2.52459
35932	CfaAffx.29532.1.S1_s_at	0.384263	4.12457
29679	CfaAffx.21784.1.S1_s_at	0.384182	5.58858
8727	Cfa.18584.2.S1_s_at	0.384182	3.95218
15224	Cfa.5683.1.A1_at	0.38408	4.05062
41577	CfaAffx.8288.1.S1_s_at	0.384061	3.22861
32725	CfaAffx.25550.1.S1_at	0.383844	4.11811
23728	CfaAffx.14530.1.S1_s_at	0.383764	4.10706
38216	CfaAffx.4095.1.S1_at	0.383699	2.92479
41176	CfaAffx.7821.1.S1_s_at	0.38366	4.03372
6314	Cfa.15602.1.A1_at	0.383583	4.18813
40009	CfaAffx.6382.1.S1_at	0.383579	3.43294
38060	CfaAffx.3920.1.S1_at	0.383394	4.19657
7000	Cfa.16493.1.A1_at	0.383355	4.026
11417	Cfa.21563.1.S1_s_at	0.383307	5.63825
7888	Cfa.17688.1.S1_s_at	0.383172	4.03303
24560	CfaAffx.15527.1.S1_at	0.38295	4.36209
9669	Cfa.19615.1.S1_s_at	0.382803	3.60719
14974	Cfa.5458.1.A1_at	0.382718	3.74535
22215	CfaAffx.12676.1.S1_at	0.382242	3.24
6933	Cfa.16395.1.S1_s_at	0.382075	6.32245
827	Cfa.10662.2.A1_at	0.381678	4.23979
35879	CfaAffx.2946.1.S1_at	0.381399	2.4364
33827	CfaAffx.26916.1.S1_at	0.381383	3.38039
20499	CfaAffx.10556.1.S1_s_at	0.381335	3.36592
34796	CfaAffx.28100.1.S1_s_at	0.381288	4.18927
28785	CfaAffx.20685.1.S1_at	0.381259	2.59215
10337	Cfa.20268.2.S1_a_at	0.381225	2.90848
29087	CfaAffx.21027.1.S1_at	0.381149	4.79682
9677	Cfa.19622.1.S1_at	0.381107	5.28633
884	Cfa.10716.1.S1_s_at	0.381066	5.59795
41811	CfaAffx.8564.1.S1_at	0.381011	3.74707
30956	CfaAffx.23394.1.S1_at	0.380976	3.19454
23336	CfaAffx.14008.1.S1_s_at	0.380717	3.31875
28604	CfaAffx.20460.1.S1_at	0.380369	5.77294
8139	Cfa.1794.1.S1_s_at	0.380367	2.40073
40414	CfaAffx.6866.1.S1_at	0.380367	4.49304
40782	CfaAffx.7317.1.S1_at	0.380239	5.35197
23690	CfaAffx.14479.1.S1_at	0.379958	2.52866
38061	CfaAffx.3921.1.S1_s_at	0.379851	3.66252
2779	Cfa.1238.12.A1_at	0.379833	4.58959
37170	CfaAffx.31082.1.S1_s_at	0.379661	4.18169
31269	CfaAffx.23810.1.S1_at	0.379582	3.17001
25283	CfaAffx.16413.1.S1_at	0.379459	5.28245
32692	CfaAffx.25514.1.S1_at	0.3794	4.04631
25982	CfaAffx.17266.1.S1_at	0.379351	3.21013
21412	CfaAffx.11721.1.S1_s_at	0.378989	5.83406
40393	CfaAffx.6844.1.S1_at	0.378742	2.89099
1427	Cfa.11220.1.A1_at	0.37861	7.49935
15778	Cfa.62.1.S1_s_at	0.378513	3.27906
26315	CfaAffx.17660.1.S1_at	0.378293	2.59263
28417	CfaAffx.20244.1.S1_at	0.37818	5.64483
4545	Cfa.13988.1.A1_at	0.378136	3.28772
5792	Cfa.15126.1.S1_at	0.378136	5.62791
30733	CfaAffx.23108.1.S1_s_at	0.378105	5.28098
37636	CfaAffx.3386.1.S1_s_at	0.378072	2.96638
7190	Cfa.16765.1.S1_at	0.377921	4.37669
8576	Cfa.18420.1.S1_s_at	0.377855	3.40946
9305	Cfa.19185.1.S1_s_at	0.377834	3.56708
28679	CfaAffx.20549.1.S1_at	0.377801	3.99306
22346	CfaAffx.12829.1.S1_s_at	0.377693	5.54122
34025	CfaAffx.27161.1.S1_at	0.377629	5.07769
12638	Cfa.323.1.S1_s_at	0.377612	3.83737
14093	Cfa.468.1.S1_at	0.377611	6.02738
16435	Cfa.6771.1.S1_at	0.377411	5.10393
22580	CfaAffx.1309.1.S1_at	0.377207	6.24064
29544	CfaAffx.21628.1.S1_s_at	0.377153	5.98426
12210	Cfa.2818.1.A1_at	0.377052	5.43174
8639	Cfa.18489.1.S1_at	0.376885	3.87298
15069	Cfa.554.2.S1_at	0.376855	3.61572
30764	CfaAffx.23142.1.S1_at	0.376575	2.50556
14600	Cfa.5134.1.A1_s_at	0.376399	5.60502
6751	Cfa.16211.2.S1_at	0.376399	2.52274
31521	CfaAffx.24113.1.S1_at	0.376394	6.76373
12325	Cfa.2923.2.A1_a_at	0.376319	3.36292
4420	Cfa.13865.1.A1_s_at	0.376199	2.89035
7157	Cfa.16734.1.S1_s_at	0.376046	2.62522
37543	CfaAffx.3274.1.S1_s_at	0.375851	4.85122
23706	CfaAffx.14497.1.S1_at	0.375795	2.48661
42230	CfaAffx.9067.1.S1_at	0.375594	2.81223
30179	CfaAffx.22385.1.S1_x_at	0.375067	2.42968
24269	CfaAffx.15182.1.S1_s_at	0.374562	3.60188
10786	Cfa.20854.1.S1_at	0.374523	3.73788
34238	CfaAffx.27421.1.S1_at	0.374426	5.33604
4006	Cfa.13482.1.A1_at	0.374218	4.25393
28239	CfaAffx.20036.1.S1_at	0.373728	5.49081
22937	CfaAffx.135.1.S1_at	0.373695	5.92646
10702	Cfa.20763.1.S1_s_at	0.373453	2.44729
29612	CfaAffx.21706.1.S1_at	0.373425	2.54475
20161	CfaAffx.10165.1.S1_at	0.373365	4.7964
35926	CfaAffx.29525.1.S1_at	0.37336	2.73044
21937	CfaAffx.12342.1.S1_s_at	0.373283	5.1483
36279	CfaAffx.29948.1.S1_at	0.373137	6.30306
18911	Cfa.8860.1.A1_at	0.373044	3.68243
9702	Cfa.19648.1.S1_at	0.373016	2.48215
4645	Cfa.14075.1.A1_at	0.37299	4.79168
20661	CfaAffx.10778.1.S1_at	0.37288	4.9555
8746	Cfa.18604.1.S1_s_at	0.372875	6.02541
13199	Cfa.3753.1.S1_at	0.372838	2.64598
26985	CfaAffx.18494.1.S1_at	0.372818	5.09323
20194	CfaAffx.10201.1.S1_at	0.372736	2.93401
2608	Cfa.12236.1.A1_at	0.372614	3.83764
2544	Cfa.12195.1.S1_at	0.372587	2.47486
39847	CfaAffx.6194.1.S1_at	0.372554	2.72919
29219	CfaAffx.2120.1.S1_s_at	0.372435	3.76998
9068	Cfa.18941.1.S1_s_at	0.372066	5.32147
7136	Cfa.16707.1.A1_at	0.371957	3.05955
42698	CfaAffx.964.1.S1_x_at	0.371885	3.62408
8300	Cfa.18129.1.S1_at	0.371823	3.64991
20323	CfaAffx.10345.1.S1_at	0.371758	6.56286
11194	Cfa.21285.1.S1_at	0.371717	6.33651
29956	CfaAffx.22113.1.S1_at	0.371644	2.46999
2183	Cfa.11883.1.A1_s_at	0.371597	4.42984
26744	CfaAffx.18194.1.S1_at	0.371504	3.01498
19925	Cfa.9889.1.A1_at	0.371435	3.77182
35835	CfaAffx.294.1.S1_at	0.371351	2.55108
35753	CfaAffx.29303.1.S1_s_at	0.371274	6.87632
7700	Cfa.17417.1.S1_s_at	0.370779	3.54037
41093	CfaAffx.771.1.S1_at	0.370669	6.31579
37762	CfaAffx.3542.1.S1_s_at	0.370633	4.07492
32831	CfaAffx.25689.1.S1_at	0.370618	3.99379
11274	Cfa.21367.1.S1_s_at	0.370513	4.47689
6161	Cfa.15463.1.A1_at	0.370492	6.82865
40881	CfaAffx.7426.1.S1_s_at	0.370401	2.63743
38584	CfaAffx.4552.1.S1_at	0.370081	3.6001
10868	Cfa.20933.1.S1_s_at	0.369925	5.13232
4480	Cfa.13925.1.A1_at	0.369777	2.4256
21639	CfaAffx.11983.1.S1_at	0.369767	4.44157
29256	CfaAffx.21251.1.S1_s_at	0.369314	4.9049
7749	Cfa.1752.2.S1_s_at	0.369147	2.79508
33755	CfaAffx.26823.1.S1_at	0.369118	4.73438
34686	CfaAffx.27975.1.S1_s_at	0.368861	4.19145
30297	CfaAffx.22532.1.S1_s_at	0.368825	3.60585
32075	CfaAffx.24822.1.S1_s_at	0.368788	4.90286
12617	Cfa.3209.1.A1_s_at	0.368758	6.3728
5258	Cfa.14643.1.A1_at	0.368655	2.58888
33343	CfaAffx.26314.1.S1_s_at	0.36844	4.61446
40818	CfaAffx.736.1.S1_at	0.368407	3.11911
24150	CfaAffx.15026.1.S1_s_at	0.368352	4.82611
262	Cfa.10164.1.S1_at	0.368351	3.8291
23326	CfaAffx.140.1.S1_at	0.368299	6.72767
9590	Cfa.19541.2.A1_at	0.368052	6.57495
25839	CfaAffx.17082.1.S1_s_at	0.367976	3.24703
23025	CfaAffx.13607.1.S1_at	0.367964	5.73505
25499	CfaAffx.16695.1.S1_at	0.367337	6.0775
10384	Cfa.20319.1.S1_at	0.367214	4.41809
20695	CfaAffx.10823.1.S1_at	0.367153	2.75777
29069	CfaAffx.21004.1.S1_s_at	0.367136	5.25028
42222	CfaAffx.9059.1.S1_at	0.367089	4.21461
6101	Cfa.15408.1.A1_s_at	0.366978	5.87631
26711	CfaAffx.18158.1.S1_s_at	0.366626	3.98948
16659	Cfa.6959.1.S1_at	0.366419	5.49024
13284	Cfa.3822.1.S1_s_at	0.366394	5.15393
37356	CfaAffx.314.1.S1_s_at	0.366347	2.4221
40457	CfaAffx.691.1.S1_at	0.36631	4.69519
40475	CfaAffx.6931.1.S1_s_at	0.365688	2.67605
35273	CfaAffx.28715.1.S1_at	0.365658	3.5678
21772	CfaAffx.12147.1.S1_s_at	0.365339	6.27761
2303	Cfa.11984.1.A1_at	0.365248	6.33694
40265	CfaAffx.6707.1.S1_at	0.365246	2.74139
22809	CfaAffx.13343.1.S1_s_at	0.365192	3.9133
32229	CfaAffx.24978.1.S1_at	0.364671	4.94451
27559	CfaAffx.19192.1.S1_s_at	0.36462	2.8742
29531	CfaAffx.21611.1.S1_at	0.364192	2.65104
39483	CfaAffx.5727.1.S1_at	0.363995	2.3967
14711	Cfa.5230.1.A1_s_at	0.363968	3.37477
8433	Cfa.18257.1.S1_x_at	0.363922	2.61304
5011	Cfa.14410.1.A1_s_at	0.363818	2.77807
5623	Cfa.14983.1.A1_at	0.363797	2.657
34365	CfaAffx.27591.1.S1_s_at	0.363787	4.9099
42766	CfaAffx.9728.1.S1_at	0.363783	2.88775
8170	Cfa.17976.1.S1_s_at	0.363726	3.6339
16243	Cfa.6609.1.S1_at	0.363646	6.72961
26005	CfaAffx.17293.1.S1_s_at	0.363465	4.89528
19160	Cfa.9111.1.A1_at	0.363197	3.95979
33931	CfaAffx.27041.1.S1_at	0.362785	6.52092
28739	CfaAffx.20634.1.S1_at	0.362653	4.79995
8972	Cfa.18834.1.S1_at	0.362619	3.6118
2955	Cfa.12521.1.A1_at	0.362472	3.20311
15114	Cfa.558.1.S1_at	0.362429	3.56069
3113	Cfa.12653.3.A1_at	0.362227	4.44354
39474	CfaAffx.5718.1.S1_s_at	0.362171	7.84202
38679	CfaAffx.4657.1.S1_s_at	0.361945	2.59288
35303	CfaAffx.2875.1.S1_s_at	0.361845	2.91419
30815	CfaAffx.23204.1.S1_at	0.361672	6.02616
22555	CfaAffx.13062.1.S1_s_at	0.361575	3.108
2748	Cfa.12355.1.A1_at	0.361346	7.57058
34562	CfaAffx.27841.1.S1_s_at	0.361262	7.06983
9079	Cfa.18958.2.S1_at	0.36117	3.15768
28749	CfaAffx.20646.1.S1_at	0.361093	3.31216
12878	Cfa.3482.1.S1_at	0.361081	2.77168
8333	Cfa.1816.1.A1_s_at	0.361051	4.47194
17508	Cfa.7693.1.A1_at	0.360946	5.3411
39174	CfaAffx.534.1.S1_x_at	0.360932	2.43933
11491	Cfa.2167.1.A1_at	0.360686	4.63196
26265	CfaAffx.17604.1.S1_at	0.360642	2.39017
1359	Cfa.11154.1.A1_at	0.360517	4.02144
16225	Cfa.6594.1.S1_at	0.360515	4.21509
9143	Cfa.19022.1.S1_s_at	0.360484	4.93616
29744	CfaAffx.21858.1.S1_s_at	0.360347	6.39452
14609	Cfa.5143.1.S1_at	0.360341	2.59055
7535	Cfa.17224.1.S1_at	0.360282	2.75106
30646	CfaAffx.230.1.S1_at	0.360054	5.31499
36311	CfaAffx.29989.1.S1_at	0.359983	3.32276
8924	Cfa.18782.1.S1_s_at	0.359959	5.99507
10115	Cfa.20053.1.S1_s_at	0.35995	4.51517
20470	CfaAffx.1052.1.S1_s_at	0.3599	4.02182
18421	Cfa.846.1.S1_at	0.359894	2.42578
19245	Cfa.9201.1.A1_at	0.359844	3.95844
9032	Cfa.18905.1.S1_s_at	0.359763	4.0292
41309	CfaAffx.7979.1.S1_at	0.359645	6.03118
17242	Cfa.7464.1.A1_at	0.35948	6.36228
18356	Cfa.8406.1.S1_at	0.359354	7.20838
42248	CfaAffx.9087.1.S1_at	0.359014	2.50982
1924	Cfa.11661.1.A1_s_at	0.358991	4.06358
38699	CfaAffx.4686.1.S1_at	0.358881	4.21837
23340	CfaAffx.14012.1.S1_at	0.35881	2.40374
29692	CfaAffx.21800.1.S1_at	0.358666	5.45212
35750	CfaAffx.29300.1.S1_at	0.358215	5.95392
37862	CfaAffx.3670.1.S1_at	0.358207	6.71958
38573	CfaAffx.4538.1.S1_at	0.358184	5.73472
12483	Cfa.3071.1.S1_at	0.358114	2.5342
431	Cfa.10322.1.A1_at	0.357911	3.38427
10498	Cfa.20468.1.S1_at	0.357794	4.81001
19373	Cfa.9331.1.A1_at	0.357789	6.60744
38004	CfaAffx.3846.1.S1_at	0.357778	3.81192
10179	Cfa.20118.1.S1_s_at	0.35739	4.80081
22052	CfaAffx.12483.1.S1_s_at	0.357352	2.56822
25271	CfaAffx.16395.1.S1_s_at	0.35734	4.90048
35262	CfaAffx.28697.1.S1_s_at	0.357123	4.28612
32663	CfaAffx.25482.1.S1_at	0.35706	4.05751
42681	CfaAffx.9622.1.S1_at	0.357047	2.52175
38202	CfaAffx.4082.1.S1_at	0.356903	4.2721
10318	Cfa.20250.1.S1_s_at	0.356495	7.03482
34601	CfaAffx.27885.1.S1_at	0.356434	3.42108
908	Cfa.10739.1.A1_s_at	0.356333	5.52038
18989	Cfa.8940.1.A1_s_at	0.356281	6.49089
41595	CfaAffx.8313.1.S1_x_at	0.356191	4.74385
539	Cfa.1042.1.A1_at	0.356081	7.27953
29904	CfaAffx.22058.1.S1_at	0.356056	3.31701
39459	CfaAffx.5702.1.S1_at	0.35593	3.38166
29260	CfaAffx.2126.1.S1_s_at	0.355923	2.80459
41540	CfaAffx.8245.1.S1_s_at	0.355879	5.24208
10237	Cfa.20169.1.S1_at	0.355859	3.57355
29449	CfaAffx.21499.1.S1_s_at	0.355854	3.95291
886	Cfa.10719.1.S1_s_at	0.355744	5.62017
40760	CfaAffx.7282.1.S1_s_at	0.355591	3.7038
39879	CfaAffx.6227.1.S1_at	0.35536	3.57703
472	Cfa.10360.1.A1_at	0.355261	3.63661
26088	CfaAffx.17391.1.S1_at	0.355235	5.32105
36313	CfaAffx.2999.1.S1_s_at	0.355231	5.75327
31586	CfaAffx.24198.1.S1_at	0.355077	4.08224
32910	CfaAffx.25775.1.S1_s_at	0.354985	3.49273
26000	CfaAffx.17289.1.S1_s_at	0.354742	2.86501
7213	Cfa.1679.1.A1_at	0.354726	2.9683
9799	Cfa.19742.1.S1_at	0.354708	4.40284
3532	Cfa.13042.2.A1_a_at	0.354619	2.5736
7612	Cfa.17312.1.S1_s_at	0.354618	5.21295
40097	CfaAffx.6497.1.S1_at	0.354613	4.81542
2430	Cfa.12088.1.A1_at	0.354095	2.43019
34176	CfaAffx.27349.1.S1_at	0.353949	5.13606
645	Cfa.10515.1.S1_at	0.353616	3.30418
34261	CfaAffx.27455.1.S1_s_at	0.353421	5.75255
20640	CfaAffx.10748.1.S1_at	0.353289	5.61378
27569	CfaAffx.19205.1.S1_at	0.353189	4.75809
17846	Cfa.7988.1.A1_at	0.353159	2.98191
24267	CfaAffx.15180.1.S1_at	0.353121	3.13974
27412	CfaAffx.19020.1.S1_at	0.353099	5.30615
6626	Cfa.15977.1.A1_at	0.353075	2.80263
4973	Cfa.14378.1.S1_at	0.352728	3.40081
41941	CfaAffx.8728.1.S1_at	0.352727	4.70016
8054	Cfa.17854.1.S1_at	0.352715	2.81303
12614	Cfa.3201.1.A1_at	0.35268	7.52636
30371	CfaAffx.22632.1.S1_x_at	0.35243	2.95445
9726	Cfa.19672.1.S1_at	0.352385	3.66352
41936	CfaAffx.872.1.S1_at	0.352276	2.57137
32820	CfaAffx.25674.1.S1_s_at	0.352274	3.22118
27648	CfaAffx.19294.1.S1_s_at	0.352085	3.04798
26018	CfaAffx.17312.1.S1_at	0.351897	3.23647
38510	CfaAffx.4453.1.S1_at	0.351707	4.25408
36046	CfaAffx.29670.1.S1_at	0.351541	2.50766
16125	Cfa.6507.1.A1_at	0.351509	2.72013
28457	CfaAffx.20295.1.S1_at	0.351499	3.40162
27386	CfaAffx.18989.1.S1_at	0.351155	2.61476
30729	CfaAffx.23103.1.S1_at	0.35109	5.61291
29009	CfaAffx.20939.1.S1_x_at	0.351086	11.1894
38268	CfaAffx.4158.1.S1_at	0.351002	7.54268
33434	CfaAffx.26430.1.S1_s_at	0.35099	4.82375
7221	Cfa.168.1.S1_at	0.350746	2.7886
35211	CfaAffx.2863.1.S1_at	0.350522	4.525
35326	CfaAffx.28774.1.S1_at	0.350499	2.596
31118	CfaAffx.23603.1.S1_at	0.350494	2.4027
10196	Cfa.20134.1.S1_at	0.350463	5.49391
41349	CfaAffx.8015.1.S1_at	0.35046	2.81799
42895	CfaAffx.990.1.S1_at	0.350458	3.09095
14241	Cfa.4807.1.A1_at	0.350448	3.32733
32629	CfaAffx.25442.1.S1_at	0.350362	5.43176
5585	Cfa.1495.1.A1_at	0.349965	6.11067
18731	Cfa.871.2.S1_s_at	0.349962	4.67662
21146	CfaAffx.11357.1.S1_at	0.349788	3.66519
24558	CfaAffx.15522.1.S1_s_at	0.349552	6.42301
9469	Cfa.1943.1.A1_at	0.349388	5.59675
27398	CfaAffx.19002.1.S1_s_at	0.349272	4.6104
2124	Cfa.11835.1.A1_s_at	0.349184	4.64432
12407	Cfa.30.1.S1_s_at	0.348957	2.38822
18856	Cfa.8811.1.A1_at	0.348922	7.148
5905	Cfa.15220.1.A1_s_at	0.34878	4.14985
21292	CfaAffx.11565.1.S1_at	0.348569	3.32585
28073	CfaAffx.19833.1.S1_at	0.348459	3.85198
9925	Cfa.19863.1.S1_at	0.348243	5.55025
40530	CfaAffx.700.1.S1_s_at	0.348204	2.3889
29410	CfaAffx.21447.1.S1_at	0.348034	3.59008
30610	CfaAffx.22957.1.S1_at	0.347967	5.4238
909	Cfa.10740.1.S1_at	0.347901	7.40748
9985	Cfa.1993.1.S1_at	0.34775	3.15048
39674	CfaAffx.5970.1.S1_s_at	0.347181	5.24213
16704	Cfa.6993.1.A1_s_at	0.346954	5.84027
35464	CfaAffx.28978.1.S1_at	0.346947	2.50353
33531	CfaAffx.26544.1.S1_at	0.346898	3.19614
29987	CfaAffx.22159.1.S1_at	0.346893	4.01719
22872	CfaAffx.13411.1.S1_s_at	0.346339	6.34984
18439	Cfa.8474.1.S1_at	0.346188	3.34211
35379	CfaAffx.28838.1.S1_at	0.346073	4.6301
10547	Cfa.20559.1.S1_s_at	0.346061	3.03032
36783	CfaAffx.30615.1.S1_at	0.345968	5.6301
25585	CfaAffx.16794.1.S1_s_at	0.345752	5.94434
39423	CfaAffx.5659.1.S1_x_at	0.345689	4.95352
14212	Cfa.4783.1.A1_at	0.345607	3.52199
40274	CfaAffx.6714.1.S1_at	0.345423	3.1956
14679	Cfa.5204.1.A1_at	0.34518	6.49271
40830	CfaAffx.7375.1.S1_at	0.345175	2.8215
34250	CfaAffx.27441.1.S1_s_at	0.344996	2.8543
24920	CfaAffx.1597.1.S1_s_at	0.344715	6.59381
25593	CfaAffx.16800.1.S1_s_at	0.344601	2.61669
7675	Cfa.17386.1.S1_s_at	0.34456	5.54471
34835	CfaAffx.28141.1.S1_at	0.344473	5.0602
6945	Cfa.16407.1.A1_at	0.344402	6.45949
38607	CfaAffx.4579.1.S1_s_at	0.344401	4.26219
16463	Cfa.6797.1.A1_a_at	0.344258	2.4257
37722	CfaAffx.3494.1.S1_s_at	0.34425	6.51776
23567	CfaAffx.1431.1.S1_s_at	0.344045	2.60968
16605	Cfa.6911.1.A1_at	0.34404	3.80143
8106	Cfa.17903.1.S1_s_at	0.344033	2.55094
430	Cfa.10321.1.A1_at	0.343819	4.76328
26737	CfaAffx.18188.1.S1_s_at	0.343606	3.33421
23040	CfaAffx.13627.1.S1_s_at	0.34353	4.96965
13168	Cfa.373.2.A1_at	0.343515	3.17661
5472	Cfa.14848.1.A1_at	0.343357	2.6947
42880	CfaAffx.9882.1.S1_at	0.343319	5.82272
9452	Cfa.19415.2.S1_s_at	0.34284	2.75676
20910	CfaAffx.11065.1.S1_s_at	0.342784	5.32479
27999	CfaAffx.19740.1.S1_at	0.342736	2.42173
36909	CfaAffx.30768.1.S1_s_at	0.342622	3.99639
39937	CfaAffx.6296.1.S1_at	0.342599	6.30668
10977	Cfa.21032.1.S1_s_at	0.342595	4.90285
28771	CfaAffx.20670.1.S1_s_at	0.342547	5.67286
4834	Cfa.1425.1.S1_at	0.342517	2.51062
5968	Cfa.15279.2.S1_at	0.342404	6.2723
27942	CfaAffx.19669.1.S1_at	0.342354	3.45257
34667	CfaAffx.27955.1.S1_x_at	0.342272	2.45139
25682	CfaAffx.16900.1.S1_s_at	0.342197	3.64933
10700	Cfa.20761.1.S1_at	0.342113	3.67964
7587	Cfa.17285.1.S1_at	0.341983	4.65219
8827	Cfa.18685.1.S1_s_at	0.341934	6.89627
19813	Cfa.977.1.S1_at	0.341934	3.64212
41377	CfaAffx.8043.1.S1_s_at	0.341466	3.40046
27028	CfaAffx.18550.1.S1_s_at	0.34145	3.71612
5087	Cfa.14492.1.A1_at	0.341422	3.9152
2174	Cfa.11876.1.A1_at	0.341422	4.87956
21246	CfaAffx.11492.1.S1_s_at	0.341283	5.53597
21594	CfaAffx.11936.1.S1_at	0.341174	5.14378
41860	CfaAffx.8629.1.S1_at	0.341118	5.36665
25625	CfaAffx.16840.1.S1_at	0.341099	5.01448
9570	Cfa.19523.1.S1_at	0.341042	2.84281
4960	Cfa.14368.1.A1_at	0.341008	5.45041
30528	CfaAffx.2284.1.S1_s_at	0.340965	3.20274
24584	CfaAffx.15557.1.S1_s_at	0.34078	3.84072
2850	Cfa.12430.1.A1_s_at	0.34074	6.2251
42887	CfaAffx.9887.1.S1_s_at	0.340673	5.69983
11981	Cfa.2610.1.A1_at	0.340543	4.50363
34542	CfaAffx.27808.1.S1_s_at	0.340469	2.39987
35095	CfaAffx.28482.1.S1_x_at	0.340432	2.77683
10827	Cfa.20897.1.S1_at	0.340422	6.64187
23900	CfaAffx.14749.1.S1_at	0.340319	2.62053
23411	CfaAffx.14116.1.S1_at	0.340194	5.2014
1026	Cfa.10844.1.A1_at	0.340148	4.35627
10193	Cfa.20130.1.S1_s_at	0.340012	3.41303
36866	CfaAffx.30709.1.S1_s_at	0.340005	4.40348
27844	CfaAffx.19552.1.S1_at	0.339898	8.68107
39049	CfaAffx.5152.1.S1_at	0.339857	2.5852
10793	Cfa.20861.1.S1_at	0.33984	4.64267
9919	Cfa.19858.1.S1_s_at	0.339777	4.54676
8733	Cfa.18592.1.S1_s_at	0.339538	5.50743
30136	CfaAffx.22343.1.S1_at	0.339468	5.63301
14418	Cfa.4967.1.A1_at	0.339417	3.24887
37215	CfaAffx.31152.1.S1_at	0.339387	5.32597
25771	CfaAffx.17004.1.S1_at	0.33936	4.85576
6540	Cfa.15807.1.S1_at	0.339275	3.22876
26359	CfaAffx.17713.1.S1_at	0.3392	2.38795
23115	CfaAffx.13731.1.S1_s_at	0.339147	4.86565
13025	Cfa.3609.1.S1_s_at	0.3389	2.79928
10846	Cfa.20914.1.S1_s_at	0.338789	5.76625
30341	CfaAffx.22592.1.S1_at	0.338474	4.5858
15581	Cfa.601.1.S1_at	0.338083	2.85903
16949	Cfa.7204.2.A1_at	0.33805	3.61616
27911	CfaAffx.19628.1.S1_s_at	0.337985	5.70499
33144	CfaAffx.26077.1.S1_at	0.337889	2.45167
33339	CfaAffx.26309.1.S1_at	0.337866	3.01167
25309	CfaAffx.16441.1.S1_s_at	0.337635	4.96843
31207	CfaAffx.23731.1.S1_s_at	0.337594	10.6232
7055	Cfa.16574.1.S1_at	0.337432	4.75194
38599	CfaAffx.4569.1.S1_at	0.337315	2.49877
41338	CfaAffx.8003.1.S1_s_at	0.337305	3.95192
34154	CfaAffx.27324.1.S1_at	0.337066	2.63797
38694	CfaAffx.4679.1.S1_at	0.33698	4.9813
4059	Cfa.13534.1.A1_at	0.336977	2.60055
19000	Cfa.895.1.A1_at	0.336616	4.44586
8676	Cfa.18528.1.S1_at	0.336562	3.51131
39530	CfaAffx.5792.1.S1_s_at	0.336531	8.17577
11708	Cfa.2361.1.A1_at	0.33638	6.55951
39473	CfaAffx.5718.1.S1_at	0.336231	4.9532
38575	CfaAffx.4542.1.S1_s_at	0.336164	3.89626
19447	Cfa.9397.2.A1_at	0.336142	3.60625
19541	Cfa.9487.1.A1_at	0.336133	4.99668
24997	CfaAffx.16056.1.S1_s_at	0.336071	3.29586
23133	CfaAffx.13758.1.S1_s_at	0.336044	5.2606
27329	CfaAffx.18917.1.S1_s_at	0.335951	4.09313
39888	CfaAffx.6235.1.S1_s_at	0.335885	3.31096
9543	Cfa.1950.1.S1_at	0.33573	3.93798
25706	CfaAffx.16930.1.S1_at	0.335638	5.24867
27459	CfaAffx.19068.1.S1_s_at	0.335637	9.81878
26401	CfaAffx.17766.1.S1_s_at	0.335591	3.7136
1652	Cfa.11415.1.A1_at	0.335304	2.40964
16813	Cfa.7088.1.A1_at	0.335196	2.47864
5898	Cfa.15215.1.A1_at	0.33518	3.94441
2449	Cfa.12101.1.A1_at	0.335118	2.99827
42054	CfaAffx.8865.1.S1_s_at	0.335074	4.04568
20297	CfaAffx.10312.1.S1_at	0.335033	2.99193
38848	CfaAffx.4877.1.S1_x_at	0.334876	7.21099
26326	CfaAffx.17673.1.S1_at	0.334782	4.68065
28693	CfaAffx.20566.1.S1_s_at	0.334742	3.14314
7634	Cfa.17339.1.S1_s_at	0.334664	5.14581
30591	CfaAffx.22931.1.S1_at	0.33463	5.53755
38710	CfaAffx.4705.1.S1_at	0.33454	3.18347
10112	Cfa.20050.1.S1_s_at	0.334497	5.82439
2508	Cfa.1216.1.A1_at	0.334467	5.46554
37526	CfaAffx.3256.1.S1_at	0.334132	2.44564
24385	CfaAffx.15310.1.S1_at	0.334027	2.47494
36746	CfaAffx.30567.1.S1_at	0.333577	4.52382
40213	CfaAffx.6643.1.S1_s_at	0.333434	3.08998
31834	CfaAffx.24504.1.S1_s_at	0.33339	4.16779
7315	Cfa.16935.1.S1_at	0.333384	5.36478
36004	CfaAffx.29627.1.S1_s_at	0.33332	3.62284
39698	CfaAffx.6.1.S1_s_at	0.333121	2.50526
38422	CfaAffx.434.1.S1_s_at	0.332975	4.60237
41185	CfaAffx.7831.1.S1_s_at	0.33289	2.60671
5957	Cfa.15266.1.S1_s_at	0.332881	5.79516
8821	Cfa.1868.1.S1_at	0.332871	4.80064
24746	CfaAffx.15749.1.S1_s_at	0.332628	3.36895
1053	Cfa.10866.1.S1_at	0.332551	4.57809
21080	CfaAffx.11265.1.S1_s_at	0.332491	3.2837
33370	CfaAffx.2635.1.S1_at	0.332445	3.30114
6637	Cfa.15997.1.S1_at	0.332342	4.7626
31021	CfaAffx.23485.1.S1_at	0.332124	8.16725
29816	CfaAffx.21951.1.S1_s_at	0.332052	10.3092
29819	CfaAffx.21953.1.S1_at	0.331897	6.86094
5989	Cfa.15300.1.A1_at	0.331733	6.84309
30827	CfaAffx.23222.1.S1_at	0.331527	4.04435
42861	CfaAffx.9845.1.S1_s_at	0.331418	3.55561
22958	CfaAffx.13527.1.S1_s_at	0.331288	3.88558
5397	Cfa.14781.1.A1_at	0.331227	5.23616
25538	CfaAffx.16737.1.S1_at	0.331163	5.01548
27629	CfaAffx.19272.1.S1_at	0.33111	2.97693
1888	Cfa.11630.2.A1_s_at	0.3311	8.27052
36235	CfaAffx.29900.1.S1_at	0.33099	4.23435
377	Cfa.10273.1.A1_at	0.330884	3.0676
36399	CfaAffx.30095.1.S1_s_at	0.330861	5.93149
26987	CfaAffx.18499.1.S1_s_at	0.330772	5.20522
5437	Cfa.14816.1.A1_s_at	0.330729	3.25925
38461	CfaAffx.4392.1.S1_s_at	0.330655	3.75914
11438	Cfa.21589.1.S1_s_at	0.330612	6.63033
28686	CfaAffx.20555.1.S1_s_at	0.330527	4.85136
8260	Cfa.18083.1.S1_s_at	0.330352	3.44799
25586	CfaAffx.16795.1.S1_at	0.330208	2.87624
32499	CfaAffx.25291.1.S1_s_at	0.330033	4.90975
39633	CfaAffx.5918.1.S1_s_at	0.329977	2.61984
38776	CfaAffx.4775.1.S1_at	0.329959	3.26246
10272	Cfa.20202.1.S1_s_at	0.329952	2.56406
16969	Cfa.7221.1.A1_at	0.329861	6.25652
4344	Cfa.13790.1.A1_at	0.329838	4.37826
12822	Cfa.3430.1.S1_at	0.329833	5.51539
27236	CfaAffx.18787.1.S1_at	0.329832	3.365
36817	CfaAffx.30653.1.S1_at	0.329629	2.84715
16191	Cfa.6566.2.S1_s_at	0.329543	4.9304
7762	Cfa.17541.1.S1_s_at	0.329285	6.75192
10705	Cfa.20768.1.S1_at	0.329202	3.03864
21378	CfaAffx.11676.1.S1_at	0.329081	2.55032
41718	CfaAffx.846.1.S1_at	0.329007	2.38525
3568	Cfa.13075.1.A1_s_at	0.328991	5.52303
2895	Cfa.12470.1.A1_at	0.328962	5.83357
31107	CfaAffx.23592.1.S1_s_at	0.328839	4.57314
3070	Cfa.1262.1.S2_at	0.328808	2.3849
32777	CfaAffx.25620.1.S1_s_at	0.328691	5.26851
14280	Cfa.4843.1.A1_at	0.328565	3.37086
24863	CfaAffx.1590.1.S1_at	0.328469	3.43163
30816	CfaAffx.23206.1.S1_s_at	0.328358	2.38479
9951	Cfa.19894.1.S1_s_at	0.328295	4.83347
41099	CfaAffx.7719.1.S1_at	0.328286	6.57169
663	Cfa.10528.1.A1_a_at	0.328283	4.34674
1369	Cfa.11164.1.A1_at	0.328248	2.93925
42544	CfaAffx.9452.1.S1_s_at	0.328218	5.29037
8339	Cfa.18165.1.S1_s_at	0.328082	6.57183
3776	Cfa.13272.1.A1_at	0.328039	4.75177
22059	CfaAffx.12492.1.S1_at	0.327901	4.16684
5190	Cfa.14584.1.A1_s_at	0.327833	4.43971
38402	CfaAffx.4317.1.S1_s_at	0.327773	7.63949
40174	CfaAffx.6597.1.S1_s_at	0.327738	11.5069
40294	CfaAffx.6733.1.S1_at	0.327629	5.05764
33277	CfaAffx.26239.1.S1_at	0.32752	5.24178
28354	CfaAffx.20164.1.S1_at	0.32738	2.62404
26937	CfaAffx.18441.1.S1_at	0.327375	4.7776
36215	CfaAffx.29868.1.S1_at	0.327371	3.75543
583	Cfa.10464.1.A1_at	0.327136	2.75426
24646	CfaAffx.15627.1.S1_s_at	0.327037	6.45204
9921	Cfa.19860.1.S1_s_at	0.326911	6.94769
42501	CfaAffx.9395.1.S1_at	0.326898	3.91604
5492	Cfa.1487.1.A1_at	0.326855	4.29917
17600	Cfa.7769.1.A1_at	0.326841	3.33456
581	Cfa.10462.3.S1_a_at	0.326778	7.08193
34223	CfaAffx.27403.1.S1_at	0.326748	2.48251
30227	CfaAffx.22437.1.S1_s_at	0.326594	3.09835
5802	Cfa.15136.1.S1_at	0.326345	4.10898
18863	Cfa.8817.1.A1_at	0.326264	2.38622
12915	Cfa.3513.1.S1_s_at	0.326228	6.60986
6813	Cfa.16276.1.S1_at	0.32614	2.71788
23694	CfaAffx.14483.1.S1_s_at	0.326133	3.38777
8373	Cfa.182.1.S2_at	0.326098	2.40461
17009	Cfa.7258.1.A1_s_at	0.326052	5.39143
10242	Cfa.20173.1.S1_s_at	0.326028	2.38919
23274	CfaAffx.13942.1.S1_at	0.326001	3.70487
3718	Cfa.13212.1.A1_at	0.325828	2.75234
39792	CfaAffx.6134.1.S1_at	0.325801	3.36579
35568	CfaAffx.29095.1.S1_at	0.325739	2.7875
41324	CfaAffx.7990.1.S1_x_at	0.325609	3.12042
41589	CfaAffx.8303.1.S1_s_at	0.325511	3.9922
6377	Cfa.15660.1.A1_s_at	0.325265	3.16058
35405	CfaAffx.28887.1.S1_at	0.325219	2.38426
5559	Cfa.14925.1.A1_s_at	0.325	5.39366
588	Cfa.10469.1.A1_at	0.324995	4.82396
38241	CfaAffx.412.1.S1_at	0.324891	3.70064
12515	Cfa.3108.1.S1_at	0.324505	5.22212
40772	CfaAffx.7304.1.S1_at	0.324125	3.94623
6192	Cfa.15494.1.A1_at	0.32411	4.13125
41686	CfaAffx.8426.1.S1_at	0.324075	2.38407
22863	CfaAffx.13404.1.S1_at	0.32371	2.72451
25588	CfaAffx.16797.1.S1_at	0.323493	4.463
21818	CfaAffx.12207.1.S1_s_at	0.323371	4.8269
40594	CfaAffx.707.1.S1_at	0.323079	4.23596
30612	CfaAffx.22959.1.S1_s_at	0.323033	5.2368
32916	CfaAffx.25781.1.S1_at	0.322982	2.51444
27165	CfaAffx.18701.1.S1_at	0.322805	4.64861
24143	CfaAffx.15017.1.S1_at	0.322771	3.61058
31258	CfaAffx.23799.1.S1_at	0.322627	4.17644
4465	Cfa.13909.1.A1_s_at	0.322611	4.00663
36071	CfaAffx.297.1.S1_at	0.322528	5.55507
15855	Cfa.6265.1.A1_s_at	0.322436	6.81475
11100	Cfa.21162.1.S1_s_at	0.322435	4.66173
6255	Cfa.15549.1.A1_s_at	0.322393	2.98432
25079	CfaAffx.1616.1.S1_s_at	0.322352	2.60844
32007	CfaAffx.24749.1.S1_s_at	0.321941	2.42409
25403	CfaAffx.1657.1.S1_at	0.321564	6.18631
30323	CfaAffx.22571.1.S1_s_at	0.321507	3.49481
20933	CfaAffx.11093.1.S1_at	0.32146	6.02339
34814	CfaAffx.28119.1.S1_at	0.321444	3.87044
25225	CfaAffx.16330.1.S1_s_at	0.321267	4.38201
18974	Cfa.8922.1.A1_at	0.321259	5.71301
16695	Cfa.6985.1.A1_at	0.321074	2.48631
11926	Cfa.2560.2.S1_at	0.320883	5.215
18391	Cfa.8437.1.A1_at	0.320644	2.49561
26633	CfaAffx.18062.1.S1_at	0.320546	3.90148
15633	Cfa.6061.1.A1_s_at	0.320517	4.6805
1277	Cfa.11075.3.A1_at	0.320421	2.8138
35078	CfaAffx.28464.1.S1_at	0.320288	3.44576
5896	Cfa.15213.1.A1_s_at	0.320191	5.47088
41715	CfaAffx.8454.1.S1_s_at	0.320144	2.38342
27258	CfaAffx.18825.1.S1_s_at	0.320066	5.54812
23829	CfaAffx.14652.1.S1_s_at	0.320041	4.49136
31008	CfaAffx.23466.1.S1_s_at	0.319969	4.84791
27969	CfaAffx.1970.1.S1_s_at	0.319917	2.39774
33914	CfaAffx.27020.1.S1_at	0.319907	6.11237
35684	CfaAffx.29232.1.S1_at	0.319896	4.38681
19792	Cfa.9749.1.S1_at	0.319873	6.71079
30745	CfaAffx.23122.1.S1_at	0.319673	2.40625
21901	CfaAffx.12295.1.S1_at	0.319666	3.00984
34019	CfaAffx.2715.1.S1_s_at	0.319646	5.43951
25165	CfaAffx.16259.1.S1_s_at	0.319496	5.53556
25048	CfaAffx.16120.1.S1_at	0.319418	2.45389
3428	Cfa.12933.1.A1_at	0.31939	2.86612
8506	Cfa.18345.1.S1_s_at	0.319335	5.7034
5378	Cfa.14762.1.S1_at	0.31906	4.17143
6766	Cfa.16228.1.S1_s_at	0.319048	6.0879
24210	CfaAffx.15115.1.S1_at	0.319023	2.77869
26733	CfaAffx.18183.1.S1_s_at	0.318903	2.55842
11090	Cfa.21153.3.A1_at	0.318872	3.59067
8710	Cfa.1857.1.S1_at	0.318667	5.94186
28202	CfaAffx.19993.1.S1_at	0.318616	2.81729
41553	CfaAffx.8260.1.S1_s_at	0.31858	5.26228
40534	CfaAffx.7003.1.S1_at	0.3185	7.22464
19510	Cfa.9456.1.A1_at	0.318453	2.71466
19311	Cfa.9267.1.A1_at	0.318251	2.3831
7305	Cfa.16920.1.S1_s_at	0.317821	5.30816
16935	Cfa.7195.1.A1_s_at	0.317691	3.17484
4444	Cfa.13888.1.A1_at	0.317613	2.38472
14072	Cfa.4663.1.S1_s_at	0.317609	5.39322
22603	CfaAffx.13116.1.S1_at	0.317462	2.62542
25868	CfaAffx.17136.1.S1_s_at	0.317443	3.69917
35103	CfaAffx.28497.1.S1_at	0.317261	3.73284
16288	Cfa.6647.1.A1_at	0.317139	2.50453
7515	Cfa.17194.1.S1_s_at	0.316965	2.53563
33538	CfaAffx.26551.1.S1_s_at	0.316934	5.84427
10768	Cfa.20839.1.S1_s_at	0.316848	3.78495
26235	CfaAffx.17561.1.S1_at	0.316717	7.26124
3574	Cfa.13079.1.A1_at	0.316075	4.44467
23010	CfaAffx.13594.1.S1_at	0.316047	3.5369
37142	CfaAffx.31051.1.S1_s_at	0.315829	6.85768
26936	CfaAffx.18440.1.S1_at	0.315825	6.04808
38935	CfaAffx.5.1.S1_at	0.31575	2.88014
4379	Cfa.13826.1.A1_at	0.315697	4.77198
18932	Cfa.8883.1.A1_at	0.315646	6.26051
10940	Cfa.21001.1.S1_at	0.315559	5.47112
12055	Cfa.268.2.S1_at	0.315509	4.71339
10816	Cfa.20888.1.S1_s_at	0.315457	7.04582
10872	Cfa.20936.1.S1_s_at	0.315229	6.0183
28270	CfaAffx.20068.1.S1_at	0.315172	4.13452
1483	Cfa.11274.1.A1_at	0.314951	7.37383
30727	CfaAffx.23101.1.S1_s_at	0.314846	6.98028
10765	Cfa.20836.1.S1_s_at	0.314729	4.81548
29014	CfaAffx.20946.1.S1_s_at	0.314677	3.75055
25442	CfaAffx.16620.1.S1_at	0.314666	5.65874
24336	CfaAffx.15255.1.S1_s_at	0.314333	3.69617
15515	Cfa.5947.1.A1_at	0.314274	2.46894
27318	CfaAffx.18901.1.S1_at	0.314239	3.40959
17932	Cfa.8052.1.A1_at	0.31418	2.4509
27512	CfaAffx.19127.1.S1_s_at	0.314033	2.548
34731	CfaAffx.28026.1.S1_s_at	0.313998	3.45088
17593	Cfa.7761.1.A1_at	0.313972	4.40445
36332	CfaAffx.30007.1.S1_at	0.313913	5.0366
13841	Cfa.449.2.S1_s_at	0.313614	7.71953
5394	Cfa.14778.1.A1_at	0.31358	2.43231
31431	CfaAffx.24001.1.S1_s_at	0.313533	2.5709
9778	Cfa.19720.1.S1_s_at	0.313524	3.11529
20859	CfaAffx.11008.1.S1_at	0.313466	2.76167
34040	CfaAffx.27184.1.S1_at	0.313293	3.4748
41266	CfaAffx.7931.1.S1_s_at	0.313093	2.77016
9550	Cfa.19507.1.S1_at	0.313085	6.39594
24189	CfaAffx.15082.1.S1_at	0.312963	4.64345
10913	Cfa.20978.1.S1_s_at	0.312943	5.93568
11278	Cfa.21370.1.S1_s_at	0.312848	6.92711
9161	Cfa.19041.1.S1_at	0.31266	9.18628
19188	Cfa.9137.1.A1_s_at	0.31261	3.88817
4318	Cfa.13766.1.A1_at	0.312501	4.19336
38823	CfaAffx.4839.1.S1_at	0.312498	3.00588
14646	Cfa.5174.1.A1_at	0.312489	3.26576
26557	CfaAffx.17974.1.S1_at	0.312455	8.09992
30386	CfaAffx.2265.1.S1_at	0.312334	2.38587
10208	Cfa.20143.1.S1_at	0.31233	5.05361
6566	Cfa.15837.1.A1_at	0.31232	5.23906
38295	CfaAffx.4188.1.S1_s_at	0.312318	6.52121
9358	Cfa.19284.1.S1_at	0.312289	5.0741
6520	Cfa.15784.1.A1_at	0.312276	3.0306
29963	CfaAffx.22122.1.S1_s_at	0.31224	5.81483
9507	Cfa.19467.1.S1_at	0.312196	2.70583
21377	CfaAffx.11672.1.S1_at	0.312164	4.59785
32939	CfaAffx.25815.1.S1_at	0.312103	3.01622
17445	Cfa.7638.1.A1_at	0.312072	2.38268
23888	CfaAffx.14735.1.S1_at	0.31196	6.47634
40149	CfaAffx.6561.1.S1_s_at	0.311831	3.84115
5128	Cfa.14531.1.A1_at	0.311627	3.97635
37645	CfaAffx.3398.1.S1_at	0.311495	4.43903
6334	Cfa.15620.1.A1_s_at	0.311364	5.99369
16030	Cfa.6413.1.A1_at	0.311003	6.64863
32527	CfaAffx.25329.1.S1_at	0.310717	2.65544
28029	CfaAffx.19777.1.S1_at	0.310285	3.7953
15246	Cfa.5701.1.A1_at	0.31019	4.62994
20801	CfaAffx.10941.1.S1_at	0.310105	3.9702
37892	CfaAffx.3711.1.S1_at	0.310055	5.36818
30378	CfaAffx.22642.1.S1_at	0.310034	3.15932
20436	CfaAffx.10479.1.S1_s_at	0.310017	4.60369
3918	Cfa.13398.1.A1_at	0.309827	2.44508
26325	CfaAffx.17671.1.S1_x_at	0.309812	3.66555
40201	CfaAffx.6628.1.S1_at	0.309721	5.12539
7159	Cfa.16736.1.S1_at	0.309614	6.40428
26627	CfaAffx.18050.1.S1_s_at	0.309613	2.62592
38176	CfaAffx.4056.1.S1_s_at	0.3096	2.66672
341	Cfa.10237.3.S1_at	0.309411	6.26672
10623	Cfa.20677.2.S1_at	0.309407	5.04493
15862	Cfa.627.1.S1_at	0.3094	3.49646
27976	CfaAffx.19706.1.S1_at	0.309324	2.40005
7299	Cfa.16913.1.S1_at	0.308917	2.88281
35555	CfaAffx.29080.1.S1_s_at	0.308872	6.37238
35414	CfaAffx.28895.1.S1_s_at	0.308866	4.2058
7210	Cfa.16788.1.A1_at	0.308756	2.45871
20234	CfaAffx.10250.1.S1_s_at	0.30871	3.32979
34318	CfaAffx.27528.1.S1_s_at	0.30867	6.39902
4000	Cfa.13478.1.A1_at	0.308641	5.70311
33903	CfaAffx.27006.1.S1_s_at	0.308615	3.13325
38761	CfaAffx.4758.1.S1_s_at	0.308513	4.62832
27241	CfaAffx.188.1.S1_at	0.308414	5.17604
35071	CfaAffx.28454.1.S1_s_at	0.308237	2.90303
28037	CfaAffx.19794.1.S1_at	0.308213	3.15696
19175	Cfa.9126.2.S1_a_at	0.308054	3.97012
9586	Cfa.19539.1.S1_s_at	0.307989	8.04758
40953	CfaAffx.7522.1.S1_s_at	0.307908	6.5913
32297	CfaAffx.25053.1.S1_x_at	0.307798	2.41009
42355	CfaAffx.9230.1.S1_at	0.307791	3.14505
8297	Cfa.18126.2.S1_at	0.307769	3.35867
39378	CfaAffx.5594.1.S1_at	0.307438	4.28927
34948	CfaAffx.28284.1.S1_s_at	0.30742	6.74729
36819	CfaAffx.30655.1.S1_at	0.307227	5.45584
21082	CfaAffx.11267.1.S1_at	0.307209	6.5621
42314	CfaAffx.9176.1.S1_at	0.30703	3.35789
6186	Cfa.1549.1.A1_at	0.30684	3.52822
26626	CfaAffx.18049.1.S1_at	0.30681	6.95567
7804	Cfa.17589.1.S1_s_at	0.306458	5.48814
37354	CfaAffx.3135.1.S1_s_at	0.306413	3.14084
22502	CfaAffx.13009.1.S1_at	0.306371	7.17507
8161	Cfa.17962.2.S1_a_at	0.306151	3.33017
408	Cfa.10303.1.S1_at	0.30602	6.90285
42322	CfaAffx.9186.1.S1_at	0.305989	6.84733
8515	Cfa.18355.1.S1_s_at	0.305609	5.79746
40548	CfaAffx.7018.1.S1_s_at	0.305503	7.87588
4727	Cfa.1415.1.A1_at	0.305347	2.99367
38451	CfaAffx.4376.1.S1_s_at	0.305316	3.96862
10570	Cfa.20597.1.S1_s_at	0.305019	5.65224
4265	Cfa.13719.1.A1_at	0.305008	6.11766
34218	CfaAffx.27395.1.S1_at	0.304897	3.48479
25574	CfaAffx.16784.1.S1_s_at	0.30488	2.49454
30080	CfaAffx.22274.1.S1_x_at	0.304869	5.08742
8086	Cfa.17885.1.S1_s_at	0.304768	6.40305
8315	Cfa.18145.1.S1_at	0.304744	3.39138
15792	Cfa.6210.1.A1_at	0.304679	2.69655
36857	CfaAffx.30695.1.S1_s_at	0.304608	5.39947
16091	Cfa.6474.1.A1_at	0.304353	3.82992
12721	Cfa.3320.1.S1_at	0.304329	10.4292
530	Cfa.10413.2.S1_a_at	0.304155	2.7912
39464	CfaAffx.5706.1.S1_s_at	0.304031	2.61414
24682	CfaAffx.15669.1.S1_at	0.303854	3.57639
4376	Cfa.13822.1.A1_at	0.303808	3.62502
40004	CfaAffx.6377.1.S1_s_at	0.303749	2.46058
32391	CfaAffx.25167.1.S1_at	0.303719	2.58278
27265	CfaAffx.18838.1.S1_s_at	0.303464	4.74228
4882	Cfa.14295.1.S1_at	0.303463	6.93667
26534	CfaAffx.17944.1.S1_x_at	0.303444	6.81159
35955	CfaAffx.29554.1.S1_s_at	0.303417	4.70363
18480	Cfa.851.1.S1_at	0.303246	5.92013
6317	Cfa.15605.1.A1_at	0.303216	2.43219
23027	CfaAffx.13608.1.S1_s_at	0.303198	7.00684
34245	CfaAffx.27431.1.S1_at	0.303191	4.55739
21714	CfaAffx.12074.1.S1_s_at	0.303116	9.91643
12429	Cfa.3021.1.A1_at	0.303111	2.84402
14222	Cfa.4792.1.A1_at	0.303035	4.95975
11097	Cfa.21160.1.S1_s_at	0.303027	2.79347
41538	CfaAffx.8243.1.S1_s_at	0.303013	5.63775
38311	CfaAffx.4204.1.S1_at	0.302987	4.7232
8216	Cfa.18019.1.S1_at	0.3029	8.93137
28235	CfaAffx.20031.1.S1_at	0.302862	5.07459
40449	CfaAffx.6899.1.S1_s_at	0.302827	3.6499
17433	Cfa.7626.1.S1_s_at	0.302616	3.12815
6952	Cfa.16417.1.S1_a_at	0.302544	5.91839
35159	CfaAffx.28567.1.S1_s_at	0.302418	7.18076
697	Cfa.10558.2.S1_s_at	0.302221	6.7429
15714	Cfa.6139.1.A1_at	0.302218	2.94855
10663	Cfa.2072.1.S1_at	0.302214	2.86716
5521	Cfa.14897.1.A1_at	0.302154	5.46247
10899	Cfa.20964.1.S1_at	0.301977	5.84336
32750	CfaAffx.25586.1.S1_at	0.301948	4.02711
11260	Cfa.21350.1.S1_at	0.301944	5.93586
14836	Cfa.534.2.A1_at	0.301833	5.54384
14373	Cfa.4929.1.A1_at	0.301738	2.66962
326	Cfa.10222.1.A1_at	0.301438	7.46019
19264	Cfa.9217.1.A1_at	0.30143	4.25697
42498	CfaAffx.9391.1.S1_s_at	0.301289	5.14222
42048	CfaAffx.8859.1.S1_s_at	0.301223	3.24439
1719	Cfa.11473.1.A1_at	0.301147	4.68301
9302	Cfa.19183.1.S1_at	0.301117	6.37395
39906	CfaAffx.6259.1.S1_at	0.301003	2.38023
21560	CfaAffx.11899.1.S1_at	0.300979	2.45018
7284	Cfa.16893.1.A1_x_at	0.300907	5.06907
24845	CfaAffx.15878.1.S1_s_at	0.300848	5.14739
1708	Cfa.11465.1.A1_at	0.300746	2.81173
20511	CfaAffx.10574.1.S1_s_at	0.300631	2.7239
[truncated: 41,036 more rows]

## Sheet: Contrast3 (c)
	ID	M	A
6258	Cfa.15554.1.A1_at	1.75752	4.06789
22597	CfaAffx.13109.1.S1_s_at	1.75522	4.81066
22596	CfaAffx.13109.1.S1_at	1.47365	4.78154
30774	CfaAffx.23153.1.S1_at	1.44552	2.75608
29188	CfaAffx.21162.1.S1_at	1.39864	6.56187
22691	CfaAffx.13209.1.S1_s_at	1.35185	7.85726
9261	Cfa.19154.1.S1_a_at	1.3409	6.67232
23489	CfaAffx.14209.1.S1_s_at	1.2834	2.59868
12910	Cfa.3510.1.S1_s_at	1.27911	6.53659
21976	CfaAffx.12390.1.S1_at	1.24972	2.90145
2586	Cfa.12217.1.A1_at	1.24786	2.8692
2571	Cfa.12204.1.A1_at	1.24594	8.80497
34242	CfaAffx.27426.1.S1_at	1.23204	3.84055
675	Cfa.10538.1.A1_at	1.19588	3.03105
12995	Cfa.3586.1.S1_at	1.19327	8.86254
25162	CfaAffx.16257.1.S1_s_at	1.19218	4.09338
12912	Cfa.3510.2.S1_s_at	1.18931	4.86261
12713	Cfa.3307.1.A1_at	1.18061	3.03598
32588	CfaAffx.25396.1.S1_at	1.17813	2.75928
34314	CfaAffx.27521.1.S1_s_at	1.14834	2.8134
37875	CfaAffx.3687.1.S1_s_at	1.14288	3.90844
29186	CfaAffx.21160.1.S1_at	1.13418	2.80509
12423	Cfa.3012.1.A1_at	1.10923	10.1584
25937	CfaAffx.17212.1.S1_s_at	1.09283	3.18305
6967	Cfa.16440.1.S1_at	1.07939	7.30768
12763	Cfa.3366.1.A1_at	1.07662	3.18352
37214	CfaAffx.31150.1.S1_at	1.05093	6.17508
2868	Cfa.12447.1.A1_at	1.04582	2.68849
34430	CfaAffx.27671.1.S1_s_at	1.04524	4.59401
41221	CfaAffx.7872.1.S1_at	1.04333	3.33216
30787	CfaAffx.23166.1.S1_s_at	1.04306	5.8662
204	Cfa.10100.1.A1_at	1.03221	3.66481
42378	CfaAffx.9253.1.S1_at	1.03181	3.46246
16386	Cfa.673.2.S1_at	1.02798	2.68356
11130	Cfa.21191.2.S1_a_at	1.02792	8.83051
8963	Cfa.18820.1.S1_s_at	1.02238	5.13825
28270	CfaAffx.20068.1.S1_at	1.01648	4.13452
3921	Cfa.1340.1.S1_at	1.01525	2.81435
41384	CfaAffx.8051.1.S1_at	1.01352	6.27019
40799	CfaAffx.7340.1.S1_at	1.01168	3.66712
23498	CfaAffx.14222.1.S1_s_at	0.977982	3.22373
35945	CfaAffx.29544.1.S1_s_at	0.968859	3.1103
12275	Cfa.2878.1.A1_s_at	0.96498	8.49714
36429	CfaAffx.30147.1.S1_s_at	0.963026	3.08527
38057	CfaAffx.3919.1.S1_s_at	0.962146	2.72419
6145	Cfa.15450.1.A1_at	0.955074	4.88556
927	Cfa.10757.1.S1_at	0.952962	8.31867
27326	CfaAffx.18912.1.S1_s_at	0.952761	4.30719
4827	Cfa.14242.2.S1_s_at	0.94657	2.55474
11404	Cfa.21549.1.S1_s_at	0.943497	3.37607
28407	CfaAffx.20227.1.S1_at	0.942008	3.43522
30011	CfaAffx.22192.1.S1_at	0.938667	3.01145
35811	CfaAffx.29362.1.S1_at	0.93696	2.4866
4285	Cfa.13735.1.A1_at	0.933091	3.69336
6237	Cfa.15533.1.A1_at	0.931702	2.60808
17902	Cfa.8027.1.A1_at	0.931443	3.16413
39735	CfaAffx.6056.1.S1_s_at	0.931275	3.16186
42646	CfaAffx.9573.1.S1_s_at	0.930334	2.51352
142	Cfa.10032.1.A1_at	0.929312	4.58849
17249	Cfa.7469.1.A1_s_at	0.924254	2.92226
25103	CfaAffx.16198.1.S1_s_at	0.923888	5.72185
15351	Cfa.5800.1.A1_at	0.922758	2.81178
11128	Cfa.21191.1.S1_a_at	0.916029	9.21823
12022	Cfa.2650.1.A1_s_at	0.913502	3.52773
9018	Cfa.18892.1.S1_s_at	0.913263	5.32285
24418	CfaAffx.15349.1.S1_at	0.902668	8.70658
40498	CfaAffx.6963.1.S1_at	0.894897	2.58857
12379	Cfa.2975.1.S1_at	0.884114	4.08199
26662	CfaAffx.18102.1.S1_at	0.884002	3.42381
9271	Cfa.19160.2.S1_at	0.878031	3.49708
24643	CfaAffx.15625.1.S1_at	0.874117	4.75324
2946	Cfa.12513.1.A1_at	0.868581	3.3933
14212	Cfa.4783.1.A1_at	0.865097	3.52199
37377	CfaAffx.3166.1.S1_s_at	0.860476	2.99917
22481	CfaAffx.12984.1.S1_s_at	0.858988	4.29196
23406	CfaAffx.14109.1.S1_s_at	0.85787	3.24213
14362	Cfa.4920.1.A1_at	0.857692	3.82935
24216	CfaAffx.15121.1.S1_at	0.854966	6.8973
6868	Cfa.16338.1.S1_s_at	0.85247	4.6442
11954	Cfa.2585.1.A1_at	0.850867	4.50469
25308	CfaAffx.16440.1.S1_at	0.850652	5.47432
22785	CfaAffx.13313.1.S1_s_at	0.849411	3.28411
42123	CfaAffx.8934.1.S1_s_at	0.848639	3.09966
11275	Cfa.21369.1.S1_s_at	0.847048	4.11954
4036	Cfa.13509.1.A1_at	0.843121	3.54434
14248	Cfa.4814.1.A1_at	0.842183	2.95266
40665	CfaAffx.7159.1.S1_at	0.837407	2.72732
22399	CfaAffx.12890.1.S1_at	0.837176	3.25259
31424	CfaAffx.23997.1.S1_at	0.836813	3.7421
20272	CfaAffx.10286.1.S1_s_at	0.836721	2.91855
3165	Cfa.127.1.S1_s_at	0.833898	3.29268
8835	Cfa.18690.1.S1_at	0.832103	3.60233
30878	CfaAffx.23293.1.S1_at	0.828054	2.75755
418	Cfa.10312.1.A1_at	0.827414	3.13626
31435	CfaAffx.24009.1.S1_at	0.82653	3.38846
21919	CfaAffx.12322.1.S1_at	0.822784	2.85803
9071	Cfa.18948.1.S1_at	0.817358	2.96981
13255	Cfa.3796.1.A1_s_at	0.815556	6.00145
28924	CfaAffx.2083.1.S1_at	0.815537	3.18453
8171	Cfa.17977.1.S1_s_at	0.815536	5.72928
29179	CfaAffx.21149.1.S1_s_at	0.814959	5.31382
41132	CfaAffx.7760.1.S1_at	0.814878	2.81289
11023	Cfa.21090.1.S1_s_at	0.812572	3.23689
25322	CfaAffx.16456.1.S1_s_at	0.811873	4.6634
15669	Cfa.6092.1.A1_at	0.809728	5.06632
13011	Cfa.3598.1.S1_at	0.808814	4.01854
11747	Cfa.2394.1.A1_s_at	0.807363	3.01833
24636	CfaAffx.15619.1.S1_at	0.805893	4.49078
28288	CfaAffx.20088.1.S1_x_at	0.804727	2.50699
5953	Cfa.15263.1.A1_s_at	0.804185	3.28132
24455	CfaAffx.15399.1.S1_x_at	0.802264	3.91949
23522	CfaAffx.14248.1.S1_at	0.80087	3.22035
23499	CfaAffx.14223.1.S1_at	0.800713	10.1601
31889	CfaAffx.24588.1.S1_at	0.800331	2.48457
9114	Cfa.18997.1.S1_s_at	0.798876	6.36884
23042	CfaAffx.13630.1.S1_at	0.796933	2.99346
12424	Cfa.3013.1.A1_at	0.79573	3.04103
1419	Cfa.11212.1.A1_at	0.793105	2.93057
31919	CfaAffx.24618.1.S1_s_at	0.790665	4.43294
1377	Cfa.1117.1.A1_s_at	0.78988	3.79173
23420	CfaAffx.14126.1.S1_s_at	0.789241	2.5657
13070	Cfa.3649.1.S1_s_at	0.788871	3.921
35372	CfaAffx.28830.1.S1_at	0.78863	4.43707
32239	CfaAffx.24988.1.S1_at	0.785955	4.03032
13100	Cfa.3675.1.S1_s_at	0.785181	2.68859
34282	CfaAffx.27481.1.S1_s_at	0.783472	2.53963
39387	CfaAffx.5605.1.S1_s_at	0.783371	3.12384
2498	Cfa.12147.1.A1_s_at	0.782962	4.53389
25590	CfaAffx.16799.1.S1_at	0.781242	3.51517
16071	Cfa.6455.1.A1_at	0.780375	3.77574
36101	CfaAffx.29732.1.S1_at	0.77897	2.58717
1196	Cfa.10995.1.A1_s_at	0.778493	2.86364
40259	CfaAffx.670.1.S1_s_at	0.778306	6.45911
6922	Cfa.16388.3.A1_at	0.777522	5.21385
36235	CfaAffx.29900.1.S1_at	0.772178	4.23435
41050	CfaAffx.7649.1.S1_at	0.770699	3.04771
27502	CfaAffx.19116.1.S1_at	0.770238	2.68344
23971	CfaAffx.14823.1.S1_s_at	0.769065	4.24057
11119	Cfa.2118.1.A1_at	0.768496	2.73474
35320	CfaAffx.28767.1.S1_at	0.768404	4.27338
16478	Cfa.6808.1.A1_at	0.768369	2.59654
24923	CfaAffx.15972.1.S1_at	0.768207	4.22676
31474	CfaAffx.24050.1.S1_s_at	0.767841	3.07382
15239	Cfa.5696.1.A1_at	0.765067	3.92794
22159	CfaAffx.12612.1.S1_at	0.761511	4.26655
36495	CfaAffx.30230.1.S1_s_at	0.76148	4.2431
5431	Cfa.14810.1.A1_at	0.760697	3.53203
39519	CfaAffx.5778.1.S1_at	0.760385	2.66139
24698	CfaAffx.1569.1.S1_s_at	0.76025	3.47094
8817	Cfa.18676.1.S1_s_at	0.758761	7.27402
31479	CfaAffx.24056.1.S1_at	0.757444	3.58078
14975	Cfa.5458.2.A1_at	0.757387	5.38296
19366	Cfa.9325.1.A1_s_at	0.757384	6.07111
39746	CfaAffx.6071.1.S1_at	0.756391	4.01097
28466	CfaAffx.20302.1.S1_at	0.756349	4.79882
29995	CfaAffx.22166.1.S1_at	0.755137	2.54938
33185	CfaAffx.2613.1.S1_at	0.753846	2.82708
27498	CfaAffx.19109.1.S1_s_at	0.753672	3.01354
42532	CfaAffx.944.1.S1_x_at	0.753527	4.66519
26513	CfaAffx.17917.1.S1_at	0.750657	5.06653
7659	Cfa.17367.1.S1_s_at	0.749622	5.21999
20661	CfaAffx.10778.1.S1_at	0.749179	4.9555
6026	Cfa.1534.1.A1_at	0.749174	4.52142
9262	Cfa.19154.1.S1_at	0.747693	5.19559
39296	CfaAffx.550.1.S1_at	0.7472	3.79909
21363	CfaAffx.11655.1.S1_s_at	0.744102	3.17071
32997	CfaAffx.25885.1.S1_s_at	0.742725	4.28052
19669	Cfa.9620.1.A1_at	0.742372	4.21594
34766	CfaAffx.28065.1.S1_s_at	0.742203	2.6396
13401	Cfa.3914.1.S2_at	0.742165	5.34246
10177	Cfa.20116.1.S1_s_at	0.742113	3.6162
21766	CfaAffx.12138.1.S1_s_at	0.741808	3.02696
1481	Cfa.11272.1.A1_at	0.741151	2.71361
6535	Cfa.15801.1.S1_at	0.740835	3.91796
9906	Cfa.19846.1.S1_s_at	0.739747	3.38348
26384	CfaAffx.17743.1.S1_at	0.739701	2.8476
39981	CfaAffx.6352.1.S1_at	0.739322	6.88701
24242	CfaAffx.15155.1.S1_s_at	0.73796	2.64355
41195	CfaAffx.7841.1.S1_at	0.7353	3.6979
11031	Cfa.21097.1.S1_s_at	0.73076	4.70886
26659	CfaAffx.18098.1.S1_at	0.730696	4.66332
1719	Cfa.11473.1.A1_at	0.73066	4.68301
19509	Cfa.9455.1.A1_at	0.730657	4.26832
40595	CfaAffx.7070.1.S1_s_at	0.729657	5.95054
33690	CfaAffx.2673.1.S1_at	0.729348	3.62091
35970	CfaAffx.29574.1.S1_at	0.729063	2.60856
23615	CfaAffx.14372.1.S1_at	0.728672	3.45901
2013	Cfa.11741.1.A1_s_at	0.728185	5.46783
29914	CfaAffx.2207.1.S1_at	0.725403	3.57227
28532	CfaAffx.20376.1.S1_s_at	0.724479	2.80734
31707	CfaAffx.24352.1.S1_at	0.724232	8.37235
15160	Cfa.5618.1.A1_at	0.724162	2.86598
7499	Cfa.1718.1.A1_at	0.723077	4.79001
22074	CfaAffx.1251.1.S1_s_at	0.721845	2.65713
16369	Cfa.6719.1.A1_a_at	0.721826	2.47939
36202	CfaAffx.29851.1.S1_at	0.720976	3.07544
3406	Cfa.12910.1.A1_at	0.720687	2.75961
1005	Cfa.10826.1.A1_at	0.72048	4.4562
8377	Cfa.18203.1.S1_s_at	0.720479	3.43293
6084	Cfa.15396.1.A1_at	0.719768	6.23513
36848	CfaAffx.30687.1.S1_at	0.718548	5.13835
38134	CfaAffx.4010.1.S1_s_at	0.717458	3.12872
20488	CfaAffx.10544.1.S1_s_at	0.717376	3.3096
36294	CfaAffx.29971.1.S1_s_at	0.716337	3.60359
6546	Cfa.15812.1.S1_at	0.716142	6.26921
9621	Cfa.19570.1.S1_at	0.715989	3.59772
37762	CfaAffx.3542.1.S1_s_at	0.714905	4.07492
12751	Cfa.3348.1.A1_at	0.714564	7.76658
12911	Cfa.3510.1.S2_at	0.713248	7.71723
26932	CfaAffx.18437.1.S1_s_at	0.712182	3.04846
19751	Cfa.9702.1.A1_at	0.712113	2.46514
22792	CfaAffx.13320.1.S1_at	0.710957	3.1141
2024	Cfa.11750.1.A1_s_at	0.709341	4.46922
30536	CfaAffx.22856.1.S1_s_at	0.709315	3.67742
16862	Cfa.7131.1.A1_at	0.708961	2.75082
30786	CfaAffx.23166.1.S1_at	0.708795	5.6858
2082	Cfa.118.1.S1_at	0.708523	3.46338
15070	Cfa.554.2.S1_x_at	0.707095	4.06591
23396	CfaAffx.14097.1.S1_s_at	0.706995	8.30923
21292	CfaAffx.11565.1.S1_at	0.70671	3.32585
14447	Cfa.4995.1.A1_at	0.706118	2.7595
37217	CfaAffx.31154.1.S1_at	0.705849	4.39467
40416	CfaAffx.6868.1.S1_at	0.705341	2.65181
13019	Cfa.3603.1.S1_s_at	0.704361	3.10053
7736	Cfa.17454.1.A1_at	0.704295	2.54892
3421	Cfa.12928.1.A1_at	0.701417	4.00129
11745	Cfa.2392.2.S1_s_at	0.69888	4.52599
30219	CfaAffx.22426.1.S1_at	0.698797	5.19339
31724	CfaAffx.24370.1.S1_s_at	0.698538	4.25249
15595	Cfa.6022.1.A1_at	0.697564	5.48259
7641	Cfa.17345.1.S1_at	0.696619	2.83342
10451	Cfa.20395.1.S1_s_at	0.69636	3.83724
10920	Cfa.20984.1.S1_at	0.694635	6.63431
42645	CfaAffx.9573.1.S1_at	0.694635	2.47527
11097	Cfa.21160.1.S1_s_at	0.694063	2.79347
7478	Cfa.17149.1.S1_s_at	0.693975	4.90351
8861	Cfa.18718.1.A1_s_at	0.693642	3.15336
34229	CfaAffx.27412.1.S1_s_at	0.693194	3.51669
35858	CfaAffx.29428.1.S1_at	0.69312	4.30227
9546	Cfa.19502.1.A1_s_at	0.692592	5.48722
35031	CfaAffx.28396.1.S1_s_at	0.692229	5.64089
323	Cfa.10219.2.A1_s_at	0.691638	4.18341
27359	CfaAffx.18957.1.S1_at	0.691364	2.68769
14601	Cfa.5135.1.A1_at	0.690828	2.63907
33531	CfaAffx.26544.1.S1_at	0.689855	3.19614
32274	CfaAffx.25031.1.S1_at	0.688628	3.01201
31997	CfaAffx.24725.1.S1_s_at	0.688338	2.94644
32219	CfaAffx.24969.1.S1_s_at	0.686758	3.95312
32515	CfaAffx.25315.1.S1_s_at	0.686059	3.62262
18307	Cfa.8371.1.A1_at	0.686017	5.39622
18582	Cfa.8590.1.A1_at	0.685485	2.72004
301	Cfa.10200.1.A1_at	0.684916	4.10941
39540	CfaAffx.5808.1.S1_at	0.683599	6.12811
7237	Cfa.16827.1.A1_at	0.68322	8.88266
20557	CfaAffx.10637.1.S1_at	0.683078	2.66422
30286	CfaAffx.2252.1.S1_at	0.681602	3.40372
10974	Cfa.2103.2.A1_at	0.679311	4.00258
31525	CfaAffx.24119.1.S1_s_at	0.678858	2.95517
42775	CfaAffx.9738.1.S1_at	0.678718	4.12697
27199	CfaAffx.18740.1.S1_s_at	0.678493	4.27225
8932	Cfa.1879.1.S1_s_at	0.677538	4.5377
14710	Cfa.5230.1.A1_at	0.676295	3.66288
10839	Cfa.20906.1.S1_s_at	0.676252	5.31118
20067	CfaAffx.10052.1.S1_s_at	0.675141	2.6379
1185	Cfa.10983.1.A1_s_at	0.673601	4.43609
2370	Cfa.12037.1.A1_s_at	0.672027	2.78238
42431	CfaAffx.9303.1.S1_at	0.671582	4.36563
12443	Cfa.3036.1.S1_at	0.670077	5.35718
4790	Cfa.14207.1.A1_at	0.669304	3.50994
8599	Cfa.18442.1.S1_s_at	0.667504	2.84347
14024	Cfa.4625.1.A1_x_at	0.666779	4.38122
25257	CfaAffx.16375.1.S1_s_at	0.666634	5.25019
34297	CfaAffx.27500.1.S1_s_at	0.666474	5.00193
8100	Cfa.17899.1.S1_s_at	0.666276	3.93618
6998	Cfa.16488.1.S1_at	0.663231	2.52996
41959	CfaAffx.8751.1.S1_s_at	0.663215	2.77998
37385	CfaAffx.3178.1.S1_at	0.662794	4.53334
11373	Cfa.21518.1.S1_s_at	0.661878	5.48447
38310	CfaAffx.4203.1.S1_at	0.661363	4.07125
26398	CfaAffx.1776.1.S1_at	0.661117	2.64086
14577	Cfa.5112.1.A1_s_at	0.660339	7.35228
41589	CfaAffx.8303.1.S1_s_at	0.659693	3.9922
36311	CfaAffx.29989.1.S1_at	0.659618	3.32276
22852	CfaAffx.13393.1.S1_at	0.659333	3.02338
31018	CfaAffx.23480.1.S1_s_at	0.658754	3.26326
9822	Cfa.19764.1.S1_s_at	0.658707	5.09879
30622	CfaAffx.22970.1.S1_s_at	0.658181	3.06322
7973	Cfa.17776.2.S1_at	0.657837	4.15316
40841	CfaAffx.7390.1.S1_s_at	0.657384	2.8324
2730	Cfa.12341.1.A1_at	0.657238	4.6875
928	Cfa.10757.1.S1_s_at	0.657123	10.7712
14095	Cfa.468.2.A1_at	0.656959	4.91336
8075	Cfa.17871.1.S1_at	0.654761	3.46195
5512	Cfa.1489.1.A1_s_at	0.65419	4.43763
29424	CfaAffx.21464.1.S1_at	0.653512	6.55081
35069	CfaAffx.2845.1.S1_at	0.651936	3.54351
19180	Cfa.913.1.A1_s_at	0.651579	6.83927
4713	Cfa.14137.1.A1_at	0.650079	4.76078
5911	Cfa.15226.1.A1_s_at	0.650068	3.31339
29545	CfaAffx.2163.1.S1_at	0.649304	7.91949
1490	Cfa.11279.1.S1_s_at	0.648349	5.00762
7150	Cfa.16730.1.S1_at	0.648156	5.10369
7544	Cfa.17233.1.S1_s_at	0.647617	2.47038
28633	CfaAffx.20490.1.S1_at	0.647547	3.72822
30724	CfaAffx.23098.1.S1_s_at	0.645231	3.12408
16061	Cfa.6443.1.A1_at	0.645121	5.28053
12521	Cfa.3116.1.A1_at	0.645012	2.5282
27023	CfaAffx.18544.1.S1_s_at	0.644365	6.64552
34000	CfaAffx.27121.1.S1_at	0.644123	4.09477
19060	Cfa.9010.1.A1_at	0.643851	4.28373
10558	Cfa.20573.1.S1_x_at	0.643442	4.75657
6407	Cfa.15686.1.A1_s_at	0.642803	2.65979
7585	Cfa.17283.1.S1_at	0.642361	3.19342
25492	CfaAffx.16687.1.S1_s_at	0.642069	3.41672
2684	Cfa.12298.1.A1_a_at	0.642042	5.80572
11322	Cfa.2146.1.S1_at	0.641167	6.70557
27744	CfaAffx.19413.1.S1_at	0.641027	2.63811
30113	CfaAffx.22311.1.S1_at	0.640885	3.11681
42008	CfaAffx.8811.1.S1_at	0.640544	6.40807
711	Cfa.10566.3.A1_at	0.6403	3.37667
16521	Cfa.6843.1.A1_at	0.639753	6.01879
12687	Cfa.3280.2.A1_at	0.639315	3.59485
13273	Cfa.381.1.A1_at	0.638939	4.99734
40314	CfaAffx.6758.1.S1_s_at	0.638491	5.66241
28461	CfaAffx.20298.1.S1_s_at	0.6378	2.68071
23613	CfaAffx.1437.1.S1_at	0.63693	4.80451
13524	Cfa.4077.1.S1_at	0.634948	8.50346
29892	CfaAffx.22041.1.S1_at	0.634338	4.73863
14843	Cfa.5345.1.A1_at	0.63406	3.95058
10337	Cfa.20268.2.S1_a_at	0.633903	2.90848
27443	CfaAffx.19051.1.S1_at	0.633599	3.84435
34420	CfaAffx.27660.1.S1_at	0.633458	3.95768
1996	Cfa.11727.1.A1_at	0.632619	6.55346
5538	Cfa.14905.2.A1_a_at	0.631812	3.53473
4821	Cfa.14238.1.A1_s_at	0.631426	3.55747
7014	Cfa.16510.1.A1_at	0.630503	6.40325
29735	CfaAffx.2185.1.S1_at	0.630103	3.02753
24612	CfaAffx.15587.1.S1_at	0.628555	3.06468
27632	CfaAffx.19276.1.S1_at	0.628436	2.44059
6246	Cfa.15541.1.A1_at	0.627785	3.47301
3089	Cfa.12634.1.A1_at	0.627206	2.84794
27877	CfaAffx.19586.1.S1_at	0.625449	3.83089
27732	CfaAffx.19399.1.S1_s_at	0.625114	3.40045
25292	CfaAffx.16422.1.S1_s_at	0.625079	5.38567
2618	Cfa.12244.1.A1_at	0.624103	7.36095
29409	CfaAffx.21446.1.S1_s_at	0.623476	4.93479
16194	Cfa.6569.1.A1_a_at	0.622345	4.98465
5551	Cfa.14917.1.A1_at	0.62203	3.16172
37378	CfaAffx.3167.1.S1_s_at	0.621401	4.60529
32536	CfaAffx.25338.1.S1_at	0.620432	4.29644
2501	Cfa.12151.1.A1_at	0.619906	6.90523
37200	CfaAffx.31123.1.S1_at	0.619608	5.12121
7482	Cfa.17153.2.S1_s_at	0.61946	2.46608
15771	Cfa.6194.1.A1_s_at	0.619013	5.79887
37859	CfaAffx.3668.1.S1_at	0.619006	3.04462
23618	CfaAffx.14376.1.S1_at	0.618988	2.79862
36470	CfaAffx.30203.1.S1_s_at	0.618482	4.86288
9940	Cfa.19879.1.S1_s_at	0.61839	3.41135
32326	CfaAffx.25087.1.S1_at	0.61828	4.13144
9634	Cfa.19584.1.A1_at	0.618171	4.22351
18590	Cfa.8595.2.A1_s_at	0.617726	3.19632
18523	Cfa.8542.1.A1_at	0.617143	5.89107
35102	CfaAffx.28496.1.S1_at	0.617058	3.85245
39091	CfaAffx.5216.1.S1_s_at	0.617011	3.39729
30056	CfaAffx.22251.1.S1_s_at	0.61645	4.59537
35684	CfaAffx.29232.1.S1_at	0.615385	4.38681
14680	Cfa.5204.1.A1_s_at	0.61413	6.45274
509	Cfa.10396.1.A1_at	0.61402	4.86487
33017	CfaAffx.25910.1.S1_s_at	0.614005	2.98791
7880	Cfa.17677.1.S1_at	0.613799	2.78885
31009	CfaAffx.23468.1.S1_s_at	0.61374	5.03741
12589	Cfa.3178.1.S1_at	0.61352	6.22547
13176	Cfa.3737.2.S1_s_at	0.613359	4.82258
38190	CfaAffx.4071.1.S1_at	0.613312	2.54969
31269	CfaAffx.23810.1.S1_at	0.612992	3.17001
7754	Cfa.17533.1.S1_at	0.612703	4.85139
10575	Cfa.20602.1.S1_s_at	0.612679	5.42798
1035	Cfa.1085.1.A1_at	0.611423	4.45073
32625	CfaAffx.25439.1.S1_at	0.611274	2.44749
15566	Cfa.5994.3.S1_at	0.611096	4.56778
20820	CfaAffx.10961.1.S1_at	0.61084	4.18401
30407	CfaAffx.22675.1.S1_at	0.610581	5.32961
30717	CfaAffx.23085.1.S1_at	0.609395	3.14909
41098	CfaAffx.7718.1.S1_at	0.60881	4.104
21225	CfaAffx.11465.1.S1_at	0.607704	4.51868
1170	Cfa.10969.1.S2_at	0.60753	2.53613
9561	Cfa.19517.1.S1_s_at	0.607131	3.40132
39452	CfaAffx.5694.1.S1_at	0.607027	6.8265
2500	Cfa.12149.1.S1_at	0.606489	8.60534
14112	Cfa.4696.1.A1_at	0.606405	2.67875
34905	CfaAffx.28228.1.S1_at	0.606013	2.43363
13728	Cfa.4366.3.A1_at	0.605326	5.68054
681	Cfa.10543.1.A1_at	0.605145	6.81488
7706	Cfa.17423.1.S1_s_at	0.604678	2.94959
12062	Cfa.2685.1.S1_at	0.604618	5.04396
38551	CfaAffx.4511.1.S1_at	0.604585	2.68913
39548	CfaAffx.5815.1.S1_at	0.604374	5.34382
3272	Cfa.12796.1.A1_at	0.603692	5.40538
38802	CfaAffx.4803.1.S1_at	0.603508	3.8872
23926	CfaAffx.14777.1.S1_s_at	0.603281	4.42645
9268	Cfa.19159.1.A1_at	0.601295	3.51462
28727	CfaAffx.20618.1.S1_s_at	0.600524	3.29346
40510	CfaAffx.6976.1.S1_s_at	0.60013	4.15054
8859	Cfa.18716.1.S1_s_at	0.599364	2.65324
19320	Cfa.9276.1.A1_at	0.599281	4.5131
22341	CfaAffx.12822.1.S1_s_at	0.598571	3.01736
30990	CfaAffx.23437.1.S1_at	0.596585	6.99734
13106	Cfa.3678.1.S1_s_at	0.596059	5.3494
20211	CfaAffx.10221.1.S1_s_at	0.594624	5.12654
31842	CfaAffx.24513.1.S1_at	0.594548	5.11634
42294	CfaAffx.9158.1.S1_s_at	0.593379	3.9463
38717	CfaAffx.4710.1.S1_at	0.592773	2.58948
25695	CfaAffx.16916.1.S1_at	0.592194	6.52692
18457	Cfa.8487.1.A1_at	0.5921	3.32544
13402	Cfa.3915.1.S1_s_at	0.591093	7.29283
30487	CfaAffx.22779.1.S1_s_at	0.590481	2.81426
27926	CfaAffx.19648.1.S1_at	0.590377	2.69625
655	Cfa.10522.1.A1_at	0.590349	2.49371
20082	CfaAffx.10071.1.S1_s_at	0.590266	4.83237
7645	Cfa.17350.1.S1_s_at	0.589629	5.03578
8579	Cfa.18423.1.S1_at	0.588639	4.63965
12093	Cfa.2715.1.S1_s_at	0.587584	3.40591
20713	CfaAffx.10847.1.S1_at	0.587498	7.15897
39879	CfaAffx.6227.1.S1_at	0.587424	3.57703
12834	Cfa.3442.1.S1_s_at	0.587387	2.95617
41802	CfaAffx.8555.1.S1_at	0.586339	5.53226
33223	CfaAffx.26177.1.S1_s_at	0.586317	3.10493
26880	CfaAffx.18365.1.S1_at	0.585962	2.45996
17846	Cfa.7988.1.A1_at	0.584686	2.98191
27942	CfaAffx.19669.1.S1_at	0.584594	3.45257
41343	CfaAffx.801.1.S1_x_at	0.583451	4.45231
13535	Cfa.4092.1.S1_at	0.583268	3.8535
7863	Cfa.17652.1.S1_s_at	0.583063	4.79372
34718	CfaAffx.28011.1.S1_s_at	0.582077	4.47624
19543	Cfa.9489.1.A1_at	0.581039	5.4908
12892	Cfa.3496.1.S1_s_at	0.580457	2.93542
24561	CfaAffx.15529.1.S1_s_at	0.580302	2.50603
33111	CfaAffx.2603.1.S1_at	0.580242	3.69835
4973	Cfa.14378.1.S1_at	0.579418	3.40081
40859	CfaAffx.7407.1.S1_at	0.578969	3.38579
8532	Cfa.18370.1.S1_s_at	0.578942	4.36604
30668	CfaAffx.23020.1.S1_at	0.578619	5.82667
10029	Cfa.19972.1.S1_s_at	0.578559	4.8205
35278	CfaAffx.28720.1.S1_at	0.578094	5.58642
10913	Cfa.20978.1.S1_s_at	0.578013	5.93568
21755	CfaAffx.12129.1.S1_at	0.577642	3.72023
26004	CfaAffx.17291.1.S1_s_at	0.576979	3.28851
25217	CfaAffx.1632.1.S1_s_at	0.576536	6.35344
25684	CfaAffx.16902.1.S1_s_at	0.575663	3.01878
14781	Cfa.5294.1.A1_at	0.575195	6.58691
21375	CfaAffx.1167.1.S1_s_at	0.574729	6.88409
35270	CfaAffx.28711.1.S1_at	0.57432	6.32498
6277	Cfa.15572.1.A1_at	0.574217	2.56908
28037	CfaAffx.19794.1.S1_at	0.573716	3.15696
17384	Cfa.758.1.S1_at	0.573522	10.3815
42821	CfaAffx.980.1.S1_at	0.573479	3.48834
35952	CfaAffx.29551.1.S1_at	0.573232	4.53423
2992	Cfa.12556.1.A1_s_at	0.572687	5.06258
532	Cfa.10414.1.A1_at	0.572526	5.74558
31522	CfaAffx.24113.1.S1_s_at	0.572092	5.24207
21924	CfaAffx.12327.1.S1_at	0.571231	4.72457
30116	CfaAffx.22324.1.S1_s_at	0.57039	4.86409
1971	Cfa.11704.1.A1_at	0.57032	6.22086
41767	CfaAffx.8520.1.S1_s_at	0.569851	2.74374
36821	CfaAffx.30657.1.S1_s_at	0.56955	4.55566
28654	CfaAffx.20515.1.S1_s_at	0.569426	2.61136
7741	Cfa.17460.1.S1_s_at	0.569321	3.4953
16140	Cfa.652.1.A1_at	0.569148	6.40397
5703	Cfa.15051.1.A1_at	0.56889	4.51306
4470	Cfa.13913.1.A1_at	0.568791	4.00445
1156	Cfa.10957.1.A1_at	0.568675	7.63822
8022	Cfa.17820.1.S1_at	0.567887	7.40696
6336	Cfa.15622.1.A1_s_at	0.566876	3.45303
8018	Cfa.17816.1.S1_s_at	0.565636	6.09251
10425	Cfa.2036.1.S1_at	0.56535	3.62576
30066	CfaAffx.22261.1.S1_at	0.56533	6.96141
2862	Cfa.12441.1.S1_s_at	0.564975	10.0067
18285	Cfa.8354.1.A1_at	0.564828	4.96522
11440	Cfa.2159.2.S1_at	0.564568	4.18566
28913	CfaAffx.20817.1.S1_s_at	0.564563	5.29533
22059	CfaAffx.12492.1.S1_at	0.564344	4.16684
5886	Cfa.15205.1.S1_at	0.563538	4.37952
3844	Cfa.1333.3.S1_a_at	0.563412	5.80566
24696	CfaAffx.15688.1.S1_s_at	0.563349	5.78456
41268	CfaAffx.7933.1.S1_s_at	0.563341	4.22668
20880	CfaAffx.1103.1.S1_at	0.563041	2.78036
27517	CfaAffx.19131.1.S1_s_at	0.562349	3.60616
33931	CfaAffx.27041.1.S1_at	0.562153	6.52092
22512	CfaAffx.13018.1.S1_at	0.561445	3.47196
34484	CfaAffx.27744.1.S1_s_at	0.561219	4.84095
26928	CfaAffx.18430.1.S1_at	0.561191	2.94265
23882	CfaAffx.14722.1.S1_s_at	0.560856	2.54694
5112	Cfa.14516.1.S1_at	0.559128	5.36234
37817	CfaAffx.3613.1.S1_at	0.55908	6.11806
30619	CfaAffx.22966.1.S1_at	0.559072	3.0136
12527	Cfa.3119.1.A1_s_at	0.559054	6.2705
6803	Cfa.16262.1.S1_at	0.558999	6.37844
5209	Cfa.14600.1.A1_at	0.557276	2.81799
42215	CfaAffx.9049.1.S1_s_at	0.557044	3.2223
29238	CfaAffx.21220.1.S1_at	0.55692	6.05979
15900	Cfa.6300.1.A1_at	0.556734	8.38873
26948	CfaAffx.18456.1.S1_s_at	0.556506	4.80671
10378	Cfa.20312.1.S1_at	0.556421	4.66822
41421	CfaAffx.8092.1.S1_s_at	0.556151	7.62417
36122	CfaAffx.29762.1.S1_at	0.556141	6.95494
37906	CfaAffx.3730.1.S1_at	0.555289	3.61355
16013	Cfa.640.1.A1_at	0.554959	3.09443
28963	CfaAffx.2088.1.S1_at	0.554917	4.15807
9897	Cfa.19837.1.S1_s_at	0.554347	4.04821
9866	Cfa.19805.1.S1_at	0.554333	2.99566
2902	Cfa.12477.1.A1_at	0.554156	8.62174
24358	CfaAffx.15282.1.S1_s_at	0.553728	2.61423
27280	CfaAffx.18858.1.S1_at	0.553236	3.14661
17912	Cfa.8033.1.A1_at	0.552689	2.77466
7264	Cfa.16863.1.S1_at	0.552637	7.75321
29948	CfaAffx.22105.1.S1_at	0.552339	6.66155
7965	Cfa.17768.1.S1_at	0.551768	2.63074
8763	Cfa.1862.1.S1_at	0.551475	2.57425
5326	Cfa.14711.1.A1_at	0.551129	3.36194
8476	Cfa.18316.1.S1_at	0.549996	2.64364
13645	Cfa.427.1.A1_at	0.549915	2.42669
42400	CfaAffx.9273.1.S1_s_at	0.549224	3.96055
28974	CfaAffx.20895.1.S1_at	0.548385	4.92075
27475	CfaAffx.19087.1.S1_at	0.546985	2.94406
34456	CfaAffx.27700.1.S1_s_at	0.546798	3.59407
5502	Cfa.14882.1.A1_at	0.546412	3.2711
14294	Cfa.4856.1.A1_at	0.546103	3.1169
26561	CfaAffx.17978.1.S1_at	0.546028	4.40937
23644	CfaAffx.14414.1.S1_s_at	0.546024	6.06745
38653	CfaAffx.4630.1.S1_at	0.545997	7.54128
10265	Cfa.20198.1.S1_s_at	0.545412	2.88492
22928	CfaAffx.13487.1.S1_at	0.545204	5.14458
40448	CfaAffx.6898.1.S1_s_at	0.544806	2.87541
5584	Cfa.14949.1.A1_s_at	0.544615	3.12052
19449	Cfa.9399.1.A1_at	0.544575	4.91832
23428	CfaAffx.14136.1.S1_s_at	0.543916	6.13742
8639	Cfa.18489.1.S1_at	0.543659	3.87298
10159	Cfa.20099.1.S1_s_at	0.543333	5.39962
34728	CfaAffx.28023.1.S1_at	0.543204	3.01967
37764	CfaAffx.3545.1.S1_at	0.542801	5.53602
13516	Cfa.4058.1.S1_s_at	0.542732	5.05483
11188	Cfa.21278.1.S1_s_at	0.542564	4.94045
15614	Cfa.6041.1.A1_at	0.542544	3.70948
615	Cfa.10491.1.S1_s_at	0.541672	7.8882
41156	CfaAffx.7797.1.S1_s_at	0.540156	4.22345
23073	CfaAffx.1367.1.S1_at	0.539506	3.0909
4626	Cfa.1406.1.S1_a_at	0.538433	5.5614
12868	Cfa.3472.1.S1_s_at	0.537778	5.85082
23880	CfaAffx.14717.1.S1_s_at	0.537642	3.17914
30521	CfaAffx.22825.1.S1_at	0.537073	3.91677
36983	CfaAffx.30864.1.S1_at	0.536953	4.08491
9845	Cfa.19785.2.A1_at	0.536469	6.16879
2743	Cfa.12350.1.A1_at	0.536247	3.43818
18456	Cfa.8486.1.A1_at	0.535553	6.06801
37158	CfaAffx.31067.1.S1_s_at	0.535013	2.51115
5178	Cfa.14571.1.S1_at	0.534679	2.5718
5954	Cfa.15263.2.A1_at	0.534201	3.95182
10848	Cfa.20916.1.S1_s_at	0.533955	7.23118
34375	CfaAffx.27603.1.S1_s_at	0.533916	4.46599
14663	Cfa.5191.1.A1_x_at	0.533807	3.16948
13233	Cfa.3777.1.S1_s_at	0.53372	4.61641
19972	Cfa.9940.2.S1_at	0.533698	2.90815
41907	CfaAffx.8691.1.S1_s_at	0.533691	2.90353
2494	Cfa.12143.1.A1_at	0.533432	3.52709
41559	CfaAffx.8265.1.S1_at	0.532802	2.8654
4723	Cfa.14146.1.A1_at	0.53279	2.41886
4906	Cfa.14316.1.A1_at	0.532599	6.61211
5724	Cfa.15070.1.A1_at	0.532374	5.032
32768	CfaAffx.25610.1.S1_at	0.532061	4.2006
6207	Cfa.15508.1.A1_at	0.532049	3.74546
10621	Cfa.20674.1.A1_at	0.531835	5.73112
38176	CfaAffx.4056.1.S1_s_at	0.531807	2.66672
4031	Cfa.13504.1.A1_at	0.531773	2.76111
37680	CfaAffx.3442.1.S1_s_at	0.530889	3.78256
36937	CfaAffx.30809.1.S1_s_at	0.530545	2.79423
11326	Cfa.21467.1.S1_s_at	0.530489	3.07098
17525	Cfa.7705.1.A1_at	0.530237	6.12559
30503	CfaAffx.228.1.S1_at	0.52991	4.65406
27938	CfaAffx.19665.1.S1_at	0.52981	3.39298
14468	Cfa.5013.1.A1_at	0.529777	5.47472
7502	Cfa.17180.2.S1_s_at	0.5297	4.51839
11169	Cfa.2125.1.S1_at	0.529339	5.89646
21880	CfaAffx.12272.1.S1_s_at	0.529198	4.58745
33367	CfaAffx.26347.1.S1_at	0.52913	2.83548
15150	Cfa.561.1.S1_at	0.528299	2.59158
40084	CfaAffx.6481.1.S1_s_at	0.528256	7.1143
21142	CfaAffx.11353.1.S1_at	0.528181	2.46441
19283	Cfa.9235.1.A1_at	0.528104	3.55127
37580	CfaAffx.3319.1.S1_at	0.527983	4.50632
13747	Cfa.4391.1.A1_at	0.527501	5.7071
5277	Cfa.14657.1.A1_s_at	0.526349	7.57498
11155	Cfa.21226.1.S1_s_at	0.526158	4.27441
32191	CfaAffx.24933.1.S1_at	0.525882	6.97254
25108	CfaAffx.16202.1.S1_s_at	0.525718	5.67925
33614	CfaAffx.26646.1.S1_at	0.524171	4.30187
5000	Cfa.14401.1.A1_at	0.524033	6.50987
40830	CfaAffx.7375.1.S1_at	0.523601	2.8215
29634	CfaAffx.21734.1.S1_at	0.523598	4.03494
11981	Cfa.2610.1.A1_at	0.523577	4.50363
10224	Cfa.20159.1.S1_s_at	0.523365	4.17397
15841	Cfa.625.1.S1_at	0.522936	3.18204
42002	CfaAffx.8801.1.S1_at	0.522797	2.9238
469	Cfa.10357.1.A1_at	0.522542	4.36173
23176	CfaAffx.13809.1.S1_s_at	0.522129	3.63329
32525	CfaAffx.25326.1.S1_s_at	0.521945	5.48295
25528	CfaAffx.16725.1.S1_s_at	0.521925	5.83011
21562	CfaAffx.1190.1.S1_s_at	0.521432	5.75023
32798	CfaAffx.2565.1.S1_at	0.521364	2.72218
25804	CfaAffx.17035.1.S1_at	0.521172	5.87546
5477	Cfa.14852.1.A1_at	0.521045	2.97879
7151	Cfa.16730.1.S1_s_at	0.520601	6.1919
2549	Cfa.12195.13.A1_s_at	0.520432	5.06535
30831	CfaAffx.23226.1.S1_s_at	0.520383	6.00554
5437	Cfa.14816.1.A1_s_at	0.519748	3.25925
20802	CfaAffx.10943.1.S1_at	0.519523	4.24197
42544	CfaAffx.9452.1.S1_s_at	0.519499	5.29037
2484	Cfa.12131.1.A1_at	0.519021	6.11468
10637	Cfa.20694.1.A1_at	0.518769	2.62275
28157	CfaAffx.1993.1.S1_s_at	0.518548	4.04099
24560	CfaAffx.15527.1.S1_at	0.518546	4.36209
22476	CfaAffx.12981.1.S1_at	0.518241	3.96712
12429	Cfa.3021.1.A1_at	0.518036	2.84402
25278	CfaAffx.16404.1.S1_at	0.517291	4.68163
9234	Cfa.19134.1.S1_s_at	0.51725	4.3216
39979	CfaAffx.6350.1.S1_at	0.517183	3.27379
19075	Cfa.9027.1.A1_at	0.51697	2.74557
8912	Cfa.18768.1.S1_at	0.516772	7.63091
4125	Cfa.13592.1.A1_at	0.516572	4.83028
26808	CfaAffx.18283.1.S1_s_at	0.516434	4.01515
3019	Cfa.12579.1.A1_s_at	0.515974	5.03509
4982	Cfa.14385.2.S1_x_at	0.515938	3.271
40110	CfaAffx.6517.1.S1_s_at	0.515893	6.64835
8211	Cfa.18014.1.S1_s_at	0.515763	5.70905
23502	CfaAffx.14226.1.S1_s_at	0.51549	8.59792
26631	CfaAffx.1806.1.S1_at	0.515037	2.79336
38859	CfaAffx.4891.1.S1_s_at	0.514865	3.38564
35343	CfaAffx.28793.1.S1_s_at	0.514729	5.42267
39212	CfaAffx.5385.1.S1_at	0.514702	3.28805
3900	Cfa.13381.1.A1_at	0.514558	3.08021
34503	CfaAffx.27762.1.S1_at	0.514465	2.43046
14848	Cfa.535.1.A1_at	0.514404	6.07876
33419	CfaAffx.26409.1.S1_at	0.513906	3.04535
9638	Cfa.19588.1.S1_at	0.51386	3.06587
40395	CfaAffx.6846.1.S1_at	0.513241	6.5617
40747	CfaAffx.7262.1.S1_at	0.513102	4.96592
11895	Cfa.2532.1.A1_at	0.512822	2.84556
11603	Cfa.2272.1.A1_at	0.512736	3.44005
41946	CfaAffx.8735.1.S1_at	0.512544	2.8069
35324	CfaAffx.28770.1.S1_at	0.511679	6.88353
7016	Cfa.16512.1.S1_s_at	0.5116	5.30455
7177	Cfa.16752.1.S1_at	0.511262	8.80593
23138	CfaAffx.13765.1.S1_at	0.510442	5.91879
14650	Cfa.5178.1.S1_at	0.510434	6.06062
10087	Cfa.20025.1.S1_s_at	0.509606	5.27914
40481	CfaAffx.694.1.S1_at	0.509314	3.59543
1781	Cfa.11534.1.A1_at	0.50891	2.41488
5375	Cfa.14757.1.S1_at	0.508852	5.43829
26744	CfaAffx.18194.1.S1_at	0.508653	3.01498
42795	CfaAffx.9763.1.S1_s_at	0.508441	8.19231
12695	Cfa.3290.1.S1_at	0.508303	11.78
9844	Cfa.19785.1.S1_s_at	0.508295	5.17024
5847	Cfa.15174.1.A1_at	0.508267	3.44009
28782	CfaAffx.20682.1.S1_s_at	0.508123	6.8373
28763	CfaAffx.20664.1.S1_s_at	0.508052	4.85424
29968	CfaAffx.22126.1.S1_s_at	0.507781	3.16111
4368	Cfa.13815.1.A1_at	0.507044	5.27949
10982	Cfa.21037.1.S1_s_at	0.50685	2.73868
20622	CfaAffx.10726.1.S1_at	0.506792	2.92367
42595	CfaAffx.9528.1.S1_s_at	0.506672	4.87076
11418	Cfa.21564.1.S1_s_at	0.506545	4.67212
10127	Cfa.20065.1.S1_s_at	0.50654	3.30841
4845	Cfa.14256.1.A1_at	0.506195	3.0344
27435	CfaAffx.19046.1.S1_x_at	0.506189	4.32691
32508	CfaAffx.25304.1.S1_s_at	0.505633	4.88035
8043	Cfa.17840.1.S1_s_at	0.505404	3.65244
3335	Cfa.12850.1.A1_at	0.505395	4.79811
4055	Cfa.13530.1.A1_at	0.505261	2.56082
9759	Cfa.19702.1.S1_at	0.504645	3.96304
13733	Cfa.4374.1.S1_at	0.504331	3.81291
20060	CfaAffx.10040.1.S1_s_at	0.504153	3.30066
2121	Cfa.11833.1.A1_s_at	0.50361	7.09932
3835	Cfa.13324.1.A1_s_at	0.503587	3.56629
31607	CfaAffx.24219.1.S1_s_at	0.502482	4.04907
586	Cfa.10467.1.A1_at	0.50198	8.58715
10326	Cfa.20257.1.S1_at	0.501557	7.85714
17596	Cfa.7764.1.A1_at	0.501555	2.64855
39584	CfaAffx.5863.1.S1_at	0.500937	4.27376
9636	Cfa.19586.1.S1_at	0.500925	3.29024
32252	CfaAffx.25005.1.S1_s_at	0.500872	4.03735
37499	CfaAffx.3221.1.S1_at	0.500717	4.05887
31464	CfaAffx.24040.1.S1_at	0.500665	3.73038
14114	Cfa.4698.1.A1_at	0.500193	5.2916
30139	CfaAffx.22345.1.S1_at	0.499464	4.65434
6543	Cfa.1581.2.S1_s_at	0.49843	2.9037
36530	CfaAffx.30277.1.S1_s_at	0.498364	4.81118
21027	CfaAffx.11202.1.S1_s_at	0.498226	3.33081
864	Cfa.10695.1.S1_at	0.498136	6.17452
5595	Cfa.14961.1.A1_at	0.498109	4.20457
25717	CfaAffx.16943.1.S1_s_at	0.498005	6.11795
1543	Cfa.11322.1.A1_s_at	0.497454	3.71668
11294	Cfa.21386.2.S1_at	0.497301	3.02468
7774	Cfa.17555.1.S1_at	0.497139	6.75827
25740	CfaAffx.16968.1.S1_at	0.496676	2.55371
26423	CfaAffx.17792.1.S1_s_at	0.494516	3.01806
11371	Cfa.21516.1.S1_s_at	0.494381	3.34547
38097	CfaAffx.3956.1.S1_at	0.494368	6.26168
9525	Cfa.19483.1.S1_s_at	0.494077	4.31797
11173	Cfa.21259.1.S1_s_at	0.49378	3.37776
21481	CfaAffx.11805.1.S1_s_at	0.493611	3.32848
2439	Cfa.12094.1.A1_at	0.493578	2.44151
14304	Cfa.4866.1.A1_at	0.493357	6.50437
19672	Cfa.9623.1.S1_at	0.493228	6.11866
7847	Cfa.17633.1.S1_at	0.493067	2.47427
36163	CfaAffx.29807.1.S1_s_at	0.492811	2.58524
9881	Cfa.19823.1.S1_at	0.492802	6.61455
30489	CfaAffx.22781.1.S1_at	0.492366	3.18561
38708	CfaAffx.4701.1.S1_at	0.492327	6.01179
31078	CfaAffx.23562.1.S1_s_at	0.492227	2.51047
11123	Cfa.21183.1.S1_s_at	0.491968	7.28026
12065	Cfa.2689.1.A1_at	0.491731	2.78116
27571	CfaAffx.19207.1.S1_at	0.491664	4.51868
6354	Cfa.1564.1.A1_at	0.491591	4.53187
31130	CfaAffx.23620.1.S1_s_at	0.491363	2.93015
19250	Cfa.9205.1.A1_at	0.490604	4.36595
42953	CfaAffx.9973.1.S1_at	0.49007	4.9693
5607	Cfa.14970.1.A1_at	0.490047	3.30632
12295	Cfa.2893.1.A1_at	0.489731	3.86163
18933	Cfa.8884.1.A1_s_at	0.489651	4.4968
16326	Cfa.6677.2.A1_s_at	0.489234	5.86388
30310	CfaAffx.22551.1.S1_s_at	0.48917	5.58634
10645	Cfa.20703.1.S1_s_at	0.488933	3.25343
13734	Cfa.4374.1.S1_s_at	0.488412	5.14735
39617	CfaAffx.5901.1.S1_at	0.488234	6.51978
40437	CfaAffx.6888.1.S1_at	0.488229	2.44957
31111	CfaAffx.23596.1.S1_s_at	0.487952	6.24297
6752	Cfa.16212.1.S1_at	0.487883	3.02371
35431	CfaAffx.2893.1.S1_s_at	0.487847	3.06128
17925	Cfa.8045.1.A1_at	0.487821	2.59854
34286	CfaAffx.2749.1.S1_s_at	0.48778	3.06114
12599	Cfa.3186.1.S1_s_at	0.487207	3.52268
29629	CfaAffx.21729.1.S1_at	0.487172	5.55976
9702	Cfa.19648.1.S1_at	0.487043	2.48215
25395	CfaAffx.16559.1.S1_s_at	0.48687	3.26055
18461	Cfa.8491.1.A1_at	0.486827	3.46827
23897	CfaAffx.14746.1.S1_at	0.486794	2.84412
7757	Cfa.17537.1.S1_s_at	0.486426	3.54735
26815	CfaAffx.18295.1.S1_s_at	0.486268	3.29422
27872	CfaAffx.1958.1.S1_at	0.486245	2.75246
11355	Cfa.21498.1.S1_s_at	0.486172	3.63638
41410	CfaAffx.808.1.S1_s_at	0.485702	2.95076
10941	Cfa.21002.1.S1_s_at	0.485573	2.55044
6722	Cfa.16166.1.S1_at	0.485352	5.20015
35589	CfaAffx.29117.1.S1_s_at	0.485285	3.39054
16990	Cfa.7241.1.A1_at	0.484839	3.8263
35687	CfaAffx.29235.1.S1_s_at	0.484784	2.98894
15189	Cfa.5649.1.A1_at	0.484584	7.36134
42355	CfaAffx.9230.1.S1_at	0.483912	3.14505
34685	CfaAffx.27975.1.S1_at	0.48389	4.27801
18184	Cfa.8274.1.A1_at	0.483313	2.91825
26734	CfaAffx.18185.1.S1_s_at	0.483229	2.85307
8592	Cfa.18437.1.S1_at	0.48319	4.64946
17049	Cfa.7297.1.A1_at	0.482849	3.59208
29189	CfaAffx.21165.1.S1_at	0.482662	4.34384
18113	Cfa.8210.1.A1_s_at	0.482655	4.09337
5513	Cfa.14890.1.A1_at	0.482643	2.7616
33012	CfaAffx.25903.1.S1_at	0.481933	2.94639
12139	Cfa.2752.2.S1_at	0.481893	6.40433
10101	Cfa.20040.1.S1_s_at	0.481865	6.16393
20542	CfaAffx.10619.1.S1_s_at	0.481657	4.68763
9509	Cfa.19469.1.S1_s_at	0.481654	3.56421
5580	Cfa.14945.1.S1_at	0.481496	2.93828
16008	Cfa.6396.1.A1_at	0.481321	6.42701
23526	CfaAffx.14252.1.S1_at	0.481294	5.70028
10255	Cfa.2019.1.A1_at	0.481173	4.8867
11259	Cfa.2135.1.A1_at	0.480976	2.78556
40251	CfaAffx.6691.1.S1_at	0.480728	5.17208
36961	CfaAffx.30841.1.S1_s_at	0.480617	5.6887
26711	CfaAffx.18158.1.S1_s_at	0.48061	3.98948
22832	CfaAffx.13370.1.S1_at	0.48038	3.55421
37677	CfaAffx.3439.1.S1_at	0.480315	5.51551
26583	CfaAffx.18000.1.S1_at	0.480082	7.39211
8970	Cfa.18831.1.S1_at	0.479811	2.46943
11323	Cfa.21461.1.S1_s_at	0.479623	5.67941
20508	CfaAffx.10568.1.S1_s_at	0.479507	5.22007
38311	CfaAffx.4204.1.S1_at	0.479355	4.7232
6551	Cfa.15817.1.S1_s_at	0.47863	6.40934
39184	CfaAffx.5353.1.S1_s_at	0.478314	4.29252
7321	Cfa.16942.1.S1_at	0.478236	6.20968
16587	Cfa.6898.1.A1_at	0.477968	2.93374
37713	CfaAffx.3482.1.S1_s_at	0.477632	4.38839
26003	CfaAffx.17291.1.S1_at	0.477446	3.34576
1563	Cfa.11340.1.S1_at	0.477427	5.7058
11792	Cfa.2437.1.A1_at	0.477366	5.37358
28515	CfaAffx.2036.1.S1_at	0.477012	3.51079
19160	Cfa.9111.1.A1_at	0.476475	3.95979
2705	Cfa.12319.1.A1_at	0.476401	5.97758
27702	CfaAffx.19361.1.S1_at	0.476378	4.5295
22202	CfaAffx.12662.1.S1_s_at	0.476364	5.96701
31532	CfaAffx.2413.1.S1_at	0.476334	4.51012
26751	CfaAffx.18209.1.S1_s_at	0.475951	2.8763
7559	Cfa.17251.1.S1_at	0.475829	8.95106
16534	Cfa.6853.2.S1_s_at	0.475453	5.79006
11412	Cfa.21556.1.S1_s_at	0.474429	4.5838
12467	Cfa.306.1.S1_at	0.474058	5.03261
14785	Cfa.5298.1.A1_at	0.473804	2.65685
7472	Cfa.1714.1.A1_at	0.473778	5.7823
20560	CfaAffx.10645.1.S1_s_at	0.473614	4.26875
9084	Cfa.18962.1.S1_s_at	0.473185	6.66774
34183	CfaAffx.27355.1.S1_s_at	0.47281	4.13883
8660	Cfa.1851.2.S1_s_at	0.47262	2.5258
21597	CfaAffx.1194.1.S1_at	0.472514	4.53105
22220	CfaAffx.12682.1.S1_s_at	0.472448	2.97905
41433	CfaAffx.8107.1.S1_at	0.472281	2.44434
24883	CfaAffx.15924.1.S1_at	0.472043	4.85625
38260	CfaAffx.4141.1.S1_at	0.47157	5.75171
7611	Cfa.17311.1.S1_s_at	0.471392	3.60169
40467	CfaAffx.6923.1.S1_x_at	0.471125	2.91983
4817	Cfa.14233.1.A1_at	0.470461	2.47329
20278	CfaAffx.10294.1.S1_s_at	0.470241	5.25909
23193	CfaAffx.13837.1.S1_s_at	0.470198	9.22795
40415	CfaAffx.6867.1.S1_at	0.47018	2.74751
33437	CfaAffx.26433.1.S1_s_at	0.47018	5.09893
17109	Cfa.7349.1.A1_at	0.470144	4.47162
22410	CfaAffx.12901.1.S1_at	0.469877	3.23726
10052	Cfa.19992.1.S1_s_at	0.469743	3.11128
40953	CfaAffx.7522.1.S1_s_at	0.469437	6.5913
20238	CfaAffx.10255.1.S1_at	0.469433	5.30393
36726	CfaAffx.30541.1.S1_s_at	0.469108	3.26545
18588	Cfa.8595.1.A1_a_at	0.46905	2.80882
10977	Cfa.21032.1.S1_s_at	0.469017	4.90285
9807	Cfa.19749.2.A1_at	0.46892	3.79789
2522	Cfa.12174.1.A1_at	0.46858	4.83739
28828	CfaAffx.20725.1.S1_s_at	0.468542	4.03431
7262	Cfa.16860.1.S1_s_at	0.468432	4.59423
18079	Cfa.8178.1.A1_at	0.468419	3.03153
41464	CfaAffx.8143.1.S1_at	0.468376	3.21716
25276	CfaAffx.16401.1.S1_at	0.468369	5.48171
34535	CfaAffx.27800.1.S1_at	0.46827	3.88502
24863	CfaAffx.1590.1.S1_at	0.468009	3.43163
2984	Cfa.12548.1.A1_at	0.468001	2.73302
24577	CfaAffx.15547.1.S1_s_at	0.467937	3.74523
28433	CfaAffx.20266.1.S1_at	0.467241	2.49755
42218	CfaAffx.9053.1.S1_at	0.467009	3.9794
8046	Cfa.17844.1.A1_at	0.46682	7.81408
23553	CfaAffx.14292.1.S1_s_at	0.466459	4.09479
11611	Cfa.2279.1.S1_at	0.466317	7.36798
2956	Cfa.12522.1.A1_at	0.466215	5.47568
40326	CfaAffx.6771.1.S1_s_at	0.466063	4.77692
42325	CfaAffx.9190.1.S1_at	0.465967	3.24765
36642	CfaAffx.30438.1.S1_s_at	0.465937	2.55549
40618	CfaAffx.7101.1.S1_s_at	0.465894	2.60636
5946	Cfa.15256.1.A1_s_at	0.465673	5.25602
42054	CfaAffx.8865.1.S1_s_at	0.465617	4.04568
24152	CfaAffx.15029.1.S1_at	0.465497	2.78887
26647	CfaAffx.18084.1.S1_at	0.465038	5.06735
30666	CfaAffx.23019.1.S1_s_at	0.464951	3.47758
12028	Cfa.2656.1.S1_at	0.464875	9.59004
4898	Cfa.14309.1.A1_at	0.464193	3.89916
10765	Cfa.20836.1.S1_s_at	0.463929	4.81548
5364	Cfa.14748.1.A1_at	0.46363	2.60143
42470	CfaAffx.9358.1.S1_s_at	0.463559	2.64073
1501	Cfa.11287.1.A1_at	0.463347	3.04776
31630	CfaAffx.24251.1.S1_at	0.463228	3.27549
14668	Cfa.5195.1.A1_s_at	0.463199	8.77838
35837	CfaAffx.29404.1.S1_at	0.463108	2.95668
28479	CfaAffx.20312.1.S1_at	0.46275	6.06004
2399	Cfa.12061.1.A1_s_at	0.462444	3.08467
26421	CfaAffx.1779.1.S1_s_at	0.462206	5.34463
41458	CfaAffx.8136.1.S1_at	0.462171	4.75102
41564	CfaAffx.827.1.S1_at	0.462045	3.16004
19126	Cfa.9082.1.A1_at	0.461897	4.7384
24846	CfaAffx.15879.1.S1_at	0.461811	3.42211
24623	CfaAffx.15603.1.S1_at	0.461778	7.22913
4271	Cfa.13722.1.A1_a_at	0.461762	7.13358
7418	Cfa.17076.1.S1_s_at	0.461518	7.02194
21913	CfaAffx.12312.1.S1_at	0.46141	3.61125
42843	CfaAffx.9823.1.S1_s_at	0.461276	5.78898
7427	Cfa.17088.2.S1_at	0.461209	4.7391
29784	CfaAffx.21911.1.S1_s_at	0.461179	4.64029
33421	CfaAffx.26410.1.S1_s_at	0.461099	3.42073
32354	CfaAffx.25121.1.S1_at	0.460746	3.89502
28486	CfaAffx.20321.1.S1_at	0.460682	5.24364
6452	Cfa.15725.1.A1_at	0.460546	3.59867
27956	CfaAffx.19687.1.S1_at	0.46041	4.05848
1277	Cfa.11075.3.A1_at	0.460201	2.8138
11697	Cfa.2351.1.S1_at	0.459907	4.24141
11662	Cfa.2324.1.A1_at	0.459585	5.9277
15882	Cfa.6285.1.A1_at	0.459338	2.98482
26674	CfaAffx.18117.1.S1_s_at	0.458311	5.91988
42356	CfaAffx.9231.1.S1_at	0.45799	3.55397
12450	Cfa.3041.1.A1_at	0.457935	5.73666
42111	CfaAffx.8920.1.S1_s_at	0.457021	3.44851
15588	Cfa.6016.1.A1_at	0.456709	5.2537
32008	CfaAffx.2475.1.S1_s_at	0.456488	5.53261
40451	CfaAffx.6903.1.S1_at	0.456294	6.02172
40684	CfaAffx.7182.1.S1_at	0.456116	2.84004
18208	Cfa.8292.1.A1_at	0.456074	4.02805
10609	Cfa.20661.1.S1_s_at	0.455899	4.74302
12575	Cfa.3166.1.S1_at	0.455215	3.71763
29264	CfaAffx.21266.1.S1_s_at	0.455105	2.42874
1963	Cfa.11697.1.A1_at	0.45508	2.50564
19625	Cfa.9572.1.A1_at	0.454959	8.44434
23438	CfaAffx.14149.1.S1_s_at	0.454911	6.48483
12437	Cfa.3030.1.A1_at	0.454794	3.76144
12175	Cfa.2787.1.A1_at	0.454445	6.0451
3691	Cfa.13189.1.A1_at	0.454043	5.89449
37116	CfaAffx.31024.1.S1_s_at	0.453496	3.88031
27458	CfaAffx.19068.1.S1_at	0.453496	8.45697
8548	Cfa.18391.1.S1_at	0.453438	5.92567
506	Cfa.10393.1.A1_at	0.453045	8.18061
40149	CfaAffx.6561.1.S1_s_at	0.452933	3.84115
6955	Cfa.16418.1.A1_at	0.452888	2.55795
42439	CfaAffx.9311.1.S1_s_at	0.452854	4.51781
31384	CfaAffx.23951.1.S1_s_at	0.452852	2.85697
1042	Cfa.10854.3.A1_at	0.452506	4.13294
16898	Cfa.7165.1.S1_s_at	0.45236	2.84932
23262	CfaAffx.13929.1.S1_s_at	0.452061	2.57964
24541	CfaAffx.15498.1.S1_at	0.451512	4.67495
10103	Cfa.20041.1.S1_s_at	0.450952	3.22517
32403	CfaAffx.25179.1.S1_s_at	0.450455	4.06833
22266	CfaAffx.12742.1.S1_s_at	0.450233	3.454
18175	Cfa.8266.1.S1_s_at	0.449979	5.62549
9023	Cfa.189.1.S1_s_at	0.449961	4.42049
37583	CfaAffx.3323.1.S1_at	0.449796	2.45333
7747	Cfa.1752.1.S1_at	0.449419	3.93042
31054	CfaAffx.23529.1.S1_s_at	0.449328	5.79065
33929	CfaAffx.2704.1.S1_at	0.449243	4.04163
4684	Cfa.14108.1.A1_at	0.448734	4.69357
11388	Cfa.21533.1.S1_s_at	0.448726	3.67431
10457	Cfa.2040.1.S1_at	0.448721	2.4627
12071	Cfa.2697.1.A1_at	0.448715	3.70418
15391	Cfa.5836.1.A1_at	0.44826	4.5416
32509	CfaAffx.25305.1.S1_s_at	0.448068	3.05307
34548	CfaAffx.27818.1.S1_at	0.447979	3.05987
38603	CfaAffx.4575.1.S1_at	0.447711	3.40328
5503	Cfa.14883.1.A1_at	0.447688	5.77915
29871	CfaAffx.2202.1.S1_at	0.447394	6.60005
13076	Cfa.3652.1.S1_s_at	0.447248	7.03428
3117	Cfa.12658.1.A1_at	0.447224	6.73531
17261	Cfa.7479.1.A1_at	0.446837	6.02959
22847	CfaAffx.13389.1.S1_at	0.446814	7.78173
34558	CfaAffx.27834.1.S1_s_at	0.446803	4.68791
8654	Cfa.18507.1.S1_s_at	0.446489	5.3837
34051	CfaAffx.27193.1.S1_at	0.446466	3.85994
737	Cfa.10584.2.S1_s_at	0.446452	4.94691
2702	Cfa.12315.1.A1_at	0.446272	3.50093
9762	Cfa.19705.1.S1_s_at	0.446175	3.01276
18480	Cfa.851.1.S1_at	0.446108	5.92013
5492	Cfa.1487.1.A1_at	0.445914	4.29917
8001	Cfa.17803.1.S1_s_at	0.445849	2.99058
21332	CfaAffx.11611.1.S1_s_at	0.445785	2.73967
34360	CfaAffx.27589.1.S1_at	0.445775	3.74571
180	Cfa.10075.1.A1_at	0.445562	4.62763
2582	Cfa.12213.1.S1_at	0.445305	2.98804
29665	CfaAffx.2177.1.S1_s_at	0.445157	7.09731
26382	CfaAffx.17741.1.S1_at	0.445141	2.66652
10952	Cfa.2101.1.A1_at	0.44465	5.95317
17685	Cfa.7842.1.A1_s_at	0.444482	7.38865
27604	CfaAffx.19245.1.S1_s_at	0.444444	4.42991
16699	Cfa.6988.2.A1_at	0.444305	2.42677
20977	CfaAffx.11139.1.S1_at	0.44414	4.45628
23744	CfaAffx.14556.1.S1_s_at	0.443968	5.07992
8316	Cfa.18146.1.S1_s_at	0.443876	5.66387
33588	CfaAffx.26607.1.S1_s_at	0.443715	4.74552
7923	Cfa.17729.1.S1_s_at	0.44366	2.41575
15840	Cfa.6249.1.A1_at	0.443119	4.81746
39200	CfaAffx.5370.1.S1_s_at	0.442905	4.21879
41629	CfaAffx.8356.1.S1_s_at	0.442866	6.25317
1804	Cfa.11556.1.A1_at	0.442859	4.97278
20257	CfaAffx.10272.1.S1_s_at	0.442763	5.91373
4364	Cfa.13810.1.A1_at	0.442337	2.60741
3845	Cfa.1333.3.S1_s_at	0.442313	6.19998
12026	Cfa.2654.1.A1_at	0.442248	4.25491
9217	Cfa.1912.1.S1_at	0.442241	4.15655
14734	Cfa.5251.1.A1_at	0.442185	3.56474
32771	CfaAffx.25616.1.S1_at	0.441905	6.10713
1592	Cfa.11366.1.A1_at	0.441419	2.45276
25355	CfaAffx.16498.1.S1_at	0.441376	3.14429
23619	CfaAffx.14377.1.S1_at	0.441242	4.41345
11640	Cfa.2304.1.A1_at	0.440928	3.72073
38853	CfaAffx.4885.1.S1_s_at	0.440794	2.59739
32939	CfaAffx.25815.1.S1_at	0.440779	3.01622
19734	Cfa.9684.1.A1_at	0.440547	2.45083
27986	CfaAffx.19717.1.S1_s_at	0.440259	5.99653
2672	Cfa.12288.1.A1_at	0.440105	8.25512
30121	CfaAffx.22328.1.S1_s_at	0.440094	4.76077
30302	CfaAffx.22541.1.S1_s_at	0.44007	5.45759
27368	CfaAffx.18965.1.S1_at	0.440041	4.66011
15265	Cfa.572.2.S1_a_at	0.439953	3.10167
4043	Cfa.13516.1.A1_at	0.439935	5.23214
5554	Cfa.14920.1.A1_at	0.439902	4.3532
15860	Cfa.6267.3.S1_s_at	0.439713	11.491
4300	Cfa.13750.1.A1_at	0.43935	2.53312
7671	Cfa.17381.1.A1_s_at	0.438957	4.33974
38958	CfaAffx.5046.1.S1_x_at	0.438916	3.65447
15723	Cfa.6149.1.A1_at	0.438661	2.5466
24881	CfaAffx.15920.1.S1_s_at	0.438566	6.04201
25629	CfaAffx.16846.1.S1_at	0.438509	7.18967
27375	CfaAffx.18976.1.S1_at	0.438147	4.80403
33404	CfaAffx.26390.1.S1_at	0.438083	2.46315
6881	Cfa.16349.2.S1_s_at	0.43784	5.70128
23311	CfaAffx.13983.1.S1_s_at	0.437589	3.02234
22105	CfaAffx.12548.1.S1_at	0.437581	3.77127
35944	CfaAffx.29543.1.S1_s_at	0.437414	4.50031
24864	CfaAffx.1590.1.S1_s_at	0.437358	2.62741
5752	Cfa.1509.3.A1_s_at	0.437338	6.72324
36659	CfaAffx.30454.1.S1_s_at	0.437261	4.18337
41411	CfaAffx.8080.1.S1_s_at	0.437211	4.62583
12145	Cfa.2756.1.S1_at	0.436636	6.43552
33004	CfaAffx.25895.1.S1_at	0.436586	2.9771
35936	CfaAffx.29538.1.S1_at	0.436581	4.65883
33362	CfaAffx.26344.1.S1_at	0.436528	4.94346
22028	CfaAffx.12452.1.S1_at	0.436523	2.68795
23913	CfaAffx.14761.1.S1_s_at	0.435558	4.31803
41251	CfaAffx.7911.1.S1_at	0.435452	2.56982
3433	Cfa.12940.1.A1_at	0.43532	5.39543
19418	Cfa.9372.1.A1_at	0.434762	5.06785
39501	CfaAffx.5753.1.S1_s_at	0.434612	4.17021
2060	Cfa.11779.1.A1_s_at	0.434048	3.95677
4865	Cfa.14276.1.A1_at	0.434048	2.52663
35309	CfaAffx.28756.1.S1_at	0.433989	4.6373
22930	CfaAffx.1349.1.S1_s_at	0.433884	4.92971
6079	Cfa.15391.1.A1_at	0.433776	2.96636
24019	CfaAffx.14872.1.S1_at	0.433745	5.13299
19178	Cfa.9128.1.A1_at	0.433662	2.40352
8776	Cfa.18636.1.S1_s_at	0.433633	4.31705
13659	Cfa.4288.1.A1_at	0.433445	2.48571
8933	Cfa.18790.1.S1_s_at	0.433044	5.58942
16848	Cfa.7119.1.A1_s_at	0.432969	4.37726
2363	Cfa.12032.1.A1_at	0.432543	3.86027
6166	Cfa.15471.1.A1_at	0.432433	2.87189
10928	Cfa.2099.1.A1_s_at	0.4321	3.92254
9359	Cfa.19285.1.S1_at	0.431598	6.84834
31265	CfaAffx.23806.1.S1_s_at	0.43133	2.50427
31579	CfaAffx.24190.1.S1_at	0.431182	3.2617
16538	Cfa.6856.1.S1_at	0.431143	5.75975
4091	Cfa.13563.1.A1_s_at	0.430683	5.97692
1102	Cfa.10902.1.S1_at	0.430671	4.34269
11541	Cfa.2214.1.A1_at	0.430577	7.23084
32222	CfaAffx.24973.1.S1_at	0.430477	3.26578
490	Cfa.10376.1.A1_at	0.430467	8.06252
10272	Cfa.20202.1.S1_s_at	0.430331	2.56406
25517	CfaAffx.16715.1.S1_at	0.430243	2.52128
10775	Cfa.20845.1.S1_s_at	0.430063	3.66449
6540	Cfa.15807.1.S1_at	0.430049	3.22876
18053	Cfa.8151.1.A1_at	0.429939	2.68547
19352	Cfa.9310.1.S1_at	0.429836	3.75183
5592	Cfa.14959.1.S1_at	0.429262	5.29082
37175	CfaAffx.31088.1.S1_at	0.428652	2.83036
26002	CfaAffx.17290.1.S1_s_at	0.428429	4.25651
5367	Cfa.14750.1.A1_at	0.428355	5.63677
41617	CfaAffx.8343.1.S1_s_at	0.428186	3.68106
33856	CfaAffx.26952.1.S1_at	0.428181	5.63414
22094	CfaAffx.12532.1.S1_s_at	0.427984	2.49786
33760	CfaAffx.26833.1.S1_s_at	0.427939	5.48431
13778	Cfa.442.1.A1_at	0.427735	2.42352
37839	CfaAffx.3641.1.S1_s_at	0.427705	2.56346
12312	Cfa.2908.1.S1_at	0.427548	6.4072
36269	CfaAffx.29935.1.S1_s_at	0.427512	5.49888
15003	Cfa.5480.1.A1_s_at	0.427401	2.50875
151	Cfa.10044.1.A1_at	0.427327	5.85866
339	Cfa.10237.1.S1_at	0.42719	6.67788
5011	Cfa.14410.1.A1_s_at	0.427128	2.77807
37783	CfaAffx.3571.1.S1_s_at	0.427116	7.41408
11464	Cfa.21612.2.S1_a_at	0.42698	2.86754
11893	Cfa.2530.1.S1_s_at	0.426815	3.60318
42493	CfaAffx.9387.1.S1_at	0.426572	3.90485
12167	Cfa.2778.1.S1_at	0.426144	2.98293
41015	CfaAffx.7597.1.S1_at	0.426035	3.69711
15431	Cfa.5873.1.A1_at	0.425971	6.49177
12746	Cfa.3342.1.A1_s_at	0.425746	7.17382
41764	CfaAffx.8518.1.S1_at	0.425631	4.59396
36276	CfaAffx.29944.1.S1_s_at	0.425601	6.2627
11432	Cfa.21582.1.S1_s_at	0.425552	6.38261
34767	CfaAffx.28066.1.S1_at	0.425497	4.9869
25709	CfaAffx.16934.1.S1_at	0.425265	3.84141
39768	CfaAffx.6095.1.S1_at	0.425126	5.60057
25877	CfaAffx.17145.1.S1_at	0.425048	2.66145
7633	Cfa.17338.1.S1_s_at	0.4247	5.10079
31657	CfaAffx.24286.1.S1_at	0.424618	3.96804
14389	Cfa.4941.1.A1_at	0.424607	6.64338
30527	CfaAffx.22838.1.S1_s_at	0.424543	6.45967
33828	CfaAffx.26916.1.S1_s_at	0.42451	4.49647
30671	CfaAffx.23022.1.S1_s_at	0.424307	5.53344
3346	Cfa.12861.1.A1_at	0.423948	2.92016
35421	CfaAffx.28912.1.S1_at	0.423666	4.69909
14032	Cfa.4630.1.A1_at	0.42366	2.74907
7570	Cfa.17267.1.S1_at	0.423574	3.75261
10417	Cfa.20351.1.S1_at	0.423347	6.28065
15667	Cfa.6090.1.S1_at	0.423092	6.91648
39479	CfaAffx.5722.1.S1_at	0.422985	3.75265
2509	Cfa.12160.1.A1_at	0.422767	4.5294
11003	Cfa.21056.1.S1_at	0.422674	7.24818
7306	Cfa.16922.1.S1_s_at	0.422602	5.55546
31671	CfaAffx.24300.1.S1_s_at	0.422503	3.51672
35342	CfaAffx.28792.1.S1_at	0.422325	6.46545
21115	CfaAffx.11309.1.S1_s_at	0.421997	5.16506
25858	CfaAffx.17110.1.S1_s_at	0.421311	3.21494
17900	Cfa.8025.2.A1_s_at	0.421252	4.62349
17514	Cfa.7698.1.S1_s_at	0.421236	5.29756
23286	CfaAffx.13954.1.S1_s_at	0.421126	5.05747
37218	CfaAffx.31155.1.S1_s_at	0.420705	3.67672
8513	Cfa.18354.1.S1_s_at	0.420656	5.56641
39465	CfaAffx.5708.1.S1_at	0.42065	3.71163
29067	CfaAffx.21001.1.S1_s_at	0.420495	3.07058
2927	Cfa.125.1.S1_s_at	0.420403	3.01704
13105	Cfa.3677.1.S1_s_at	0.420334	2.40012
3910	Cfa.13390.1.A1_s_at	0.420264	3.26263
19859	Cfa.9824.1.A1_at	0.420158	4.25454
39289	CfaAffx.5491.1.S1_x_at	0.419905	4.03018
37231	CfaAffx.31167.1.S1_s_at	0.419707	6.48683
37782	CfaAffx.3570.1.S1_s_at	0.419603	10.3439
27532	CfaAffx.19154.1.S1_at	0.419508	2.40867
18559	Cfa.8573.1.S1_at	0.419497	3.57769
24064	CfaAffx.1493.1.S1_at	0.419474	3.43529
13283	Cfa.3821.1.S1_s_at	0.419276	2.40843
3108	Cfa.12651.1.A1_at	0.418986	3.14757
27920	CfaAffx.19639.1.S1_at	0.418908	4.61103
15778	Cfa.62.1.S1_s_at	0.418803	3.27906
40724	CfaAffx.7231.1.S1_at	0.418754	3.93286
32014	CfaAffx.24755.1.S1_at	0.418665	2.90205
33200	CfaAffx.26147.1.S1_s_at	0.418633	5.74106
11773	Cfa.2419.1.S1_at	0.418521	5.41836
30541	CfaAffx.22861.1.S1_s_at	0.418507	4.14396
27974	CfaAffx.19705.1.S1_at	0.418365	3.28151
198	Cfa.10095.1.A1_at	0.418173	3.09
36063	CfaAffx.29688.1.S1_s_at	0.418062	5.55828
34085	CfaAffx.27245.1.S1_s_at	0.417763	4.93802
27847	CfaAffx.19556.1.S1_s_at	0.41754	5.23333
33219	CfaAffx.26169.1.S1_at	0.417313	7.59234
33750	CfaAffx.26814.1.S1_at	0.417231	5.86299
29503	CfaAffx.21576.1.S1_at	0.417113	4.36397
21065	CfaAffx.1125.1.S1_at	0.417081	4.14559
19815	Cfa.9770.1.A1_at	0.417052	6.7889
36564	CfaAffx.30324.1.S1_at	0.416628	3.00142
22808	CfaAffx.13342.1.S1_at	0.41627	5.98662
36680	CfaAffx.30482.1.S1_at	0.416228	2.64823
12846	Cfa.3455.1.A1_at	0.416156	3.39857
35649	CfaAffx.29197.1.S1_s_at	0.415953	2.42329
33997	CfaAffx.2712.1.S1_at	0.415951	6.35509
7606	Cfa.17305.1.S1_x_at	0.415849	3.94069
40278	CfaAffx.6717.1.S1_at	0.415762	3.82889
39300	CfaAffx.5505.1.S1_at	0.415609	4.511
10521	Cfa.20501.1.S1_at	0.415603	6.91018
5695	Cfa.15045.1.A1_at	0.41518	2.48466
25380	CfaAffx.16536.1.S1_s_at	0.415083	4.46908
1585	Cfa.11359.1.A1_s_at	0.415037	4.08443
13284	Cfa.3822.1.S1_s_at	0.41499	5.15393
41288	CfaAffx.7954.1.S1_x_at	0.414905	3.1046
9780	Cfa.19723.1.S1_s_at	0.414764	5.59518
8352	Cfa.18180.1.S1_at	0.414071	3.27026
7686	Cfa.17403.1.S1_at	0.413946	4.21113
36102	CfaAffx.29733.1.S1_s_at	0.413832	3.73459
4871	Cfa.14281.1.A1_at	0.413712	4.33271
22927	CfaAffx.13485.1.S1_s_at	0.413613	2.65441
22120	CfaAffx.12564.1.S1_at	0.413603	3.20054
39633	CfaAffx.5918.1.S1_s_at	0.413452	2.61984
23624	CfaAffx.14389.1.S1_at	0.413204	5.13506
15821	Cfa.6235.1.A1_at	0.413072	5.13786
1509	Cfa.11291.1.A1_at	0.412896	5.24138
10887	Cfa.20950.1.S1_s_at	0.412859	7.46063
728	Cfa.10578.1.A1_at	0.412797	8.47799
10984	Cfa.21038.1.S1_s_at	0.412784	3.35323
41271	CfaAffx.7937.1.S1_at	0.412643	4.82179
37170	CfaAffx.31082.1.S1_s_at	0.412568	4.18169
38946	CfaAffx.5029.1.S1_at	0.412326	5.00478
7409	Cfa.17061.1.S1_at	0.411798	6.98458
32775	CfaAffx.25619.1.S1_at	0.411617	2.40203
5882	Cfa.15200.1.S1_at	0.41143	3.23736
8129	Cfa.17930.1.S1_at	0.411392	6.54657
12370	Cfa.2964.1.A1_at	0.4113	4.58998
19706	Cfa.9658.1.A1_at	0.411273	2.66983
19426	Cfa.938.1.A1_at	0.411203	7.80832
29366	CfaAffx.21389.1.S1_at	0.411109	3.66351
15661	Cfa.6086.1.A1_at	0.411084	5.88953
9360	Cfa.19289.1.S1_at	0.410972	5.29226
22863	CfaAffx.13404.1.S1_at	0.410949	2.72451
7532	Cfa.1722.1.S1_at	0.410935	5.00995
33762	CfaAffx.26838.1.S1_at	0.410803	2.47163
29449	CfaAffx.21499.1.S1_s_at	0.41076	3.95291
39822	CfaAffx.6169.1.S1_at	0.410698	5.43807
8823	Cfa.18682.1.S1_s_at	0.410413	4.78425
25531	CfaAffx.16727.1.S1_at	0.410374	2.57371
12122	Cfa.2739.1.A1_at	0.409625	5.60565
16634	Cfa.6935.1.A1_at	0.409496	2.69792
23614	CfaAffx.14370.1.S1_at	0.409314	4.75898
40634	CfaAffx.712.1.S1_at	0.409249	5.9915
39216	CfaAffx.539.1.S1_x_at	0.408965	2.50297
17473	Cfa.766.1.A1_at	0.408876	4.42192
30378	CfaAffx.22642.1.S1_at	0.408868	3.15932
19341	Cfa.93.1.S1_at	0.408846	6.0353
31157	CfaAffx.23659.1.S1_at	0.40881	7.41608
22708	CfaAffx.13224.1.S1_s_at	0.408745	3.84576
31885	CfaAffx.24584.1.S1_s_at	0.408735	2.41519
32963	CfaAffx.25844.1.S1_at	0.408584	2.67539
7420	Cfa.17079.2.S1_a_at	0.408499	5.41331
4475	Cfa.13920.1.A1_at	0.408192	4.84909
39361	CfaAffx.5573.1.S1_at	0.408034	5.14213
28425	CfaAffx.20253.1.S1_at	0.40802	2.39806
31758	CfaAffx.24408.1.S1_at	0.407999	4.74432
19508	Cfa.9454.1.A1_at	0.407651	5.76066
401	Cfa.10295.1.A1_at	0.407435	4.86933
33565	CfaAffx.26582.1.S1_s_at	0.40743	2.39797
7553	Cfa.17240.1.S1_s_at	0.407229	4.90761
19431	Cfa.9384.1.S1_s_at	0.407207	7.23018
28799	CfaAffx.20699.1.S1_at	0.407133	7.15884
12625	Cfa.3217.1.A1_at	0.40698	6.17819
7680	Cfa.17393.1.S1_s_at	0.406959	3.08059
9513	Cfa.19473.1.S1_at	0.406915	2.72634
1272	Cfa.11072.1.A1_at	0.406769	6.49693
10340	Cfa.20270.1.S1_at	0.406653	5.57631
37065	CfaAffx.30958.1.S1_s_at	0.406616	9.79546
13737	Cfa.4376.1.S1_at	0.406248	3.75643
27948	CfaAffx.19677.1.S1_at	0.406034	2.49758
28414	CfaAffx.20239.1.S1_at	0.405463	10.0539
1289	Cfa.11085.1.A1_at	0.405458	11.0524
13525	Cfa.4077.1.S1_s_at	0.405357	8.34295
33313	CfaAffx.26277.1.S1_at	0.405052	4.18334
3428	Cfa.12933.1.A1_at	0.404856	2.86612
26088	CfaAffx.17391.1.S1_at	0.404833	5.32105
25628	CfaAffx.16844.1.S1_at	0.404666	5.4714
9842	Cfa.19782.1.S1_at	0.403817	5.19478
5307	Cfa.1469.1.S1_at	0.403641	2.4534
36847	CfaAffx.30686.1.S1_at	0.403544	3.27863
34886	CfaAffx.2820.1.S1_s_at	0.403262	8.04241
4152	Cfa.13618.1.A1_at	0.403138	6.26347
28245	CfaAffx.20041.1.S1_at	0.403051	2.42097
4273	Cfa.13723.1.A1_at	0.403043	5.40118
20232	CfaAffx.10249.1.S1_s_at	0.403035	3.83351
34463	CfaAffx.27714.1.S1_at	0.403028	3.59345
10300	Cfa.20232.1.S1_s_at	0.402939	8.01759
2754	Cfa.12361.1.A1_at	0.402701	4.88614
19614	Cfa.9558.1.A1_at	0.402666	6.63321
1136	Cfa.10933.1.A1_at	0.40238	4.36857
42915	CfaAffx.9923.1.S1_at	0.402278	2.8555
18183	Cfa.8273.1.A1_at	0.401811	3.70173
39418	CfaAffx.5654.1.S1_at	0.401449	4.25917
30613	CfaAffx.22960.1.S1_at	0.401335	6.2572
221	Cfa.10118.1.A1_at	0.401258	4.05283
31718	CfaAffx.24362.1.S1_at	0.40106	5.7708
23081	CfaAffx.13680.1.S1_s_at	0.400915	6.13867
39621	CfaAffx.5908.1.S1_at	0.400899	9.36202
36186	CfaAffx.29832.1.S1_s_at	0.400838	2.75656
9043	Cfa.18916.1.S1_at	0.400795	4.3589
34174	CfaAffx.27347.1.S1_s_at	0.400706	4.10317
2771	Cfa.12376.1.A1_at	0.400551	5.91379
36352	CfaAffx.30030.1.S1_s_at	0.400317	5.72447
27257	CfaAffx.18821.1.S1_at	0.400315	7.25571
25991	CfaAffx.17277.1.S1_at	0.40019	3.82349
14667	Cfa.5195.1.A1_at	0.400013	10.567
14513	Cfa.5055.1.A1_at	0.400011	2.80341
25604	CfaAffx.16813.1.S1_at	0.399935	4.16626
37596	CfaAffx.3340.1.S1_s_at	0.399911	2.55828
36714	CfaAffx.30528.1.S1_at	0.399779	2.82087
34818	CfaAffx.28123.1.S1_at	0.399468	4.97095
8699	Cfa.1856.1.S1_at	0.399412	2.67426
2759	Cfa.12366.1.A1_at	0.39941	4.61421
40709	CfaAffx.7216.1.S1_s_at	0.399367	2.896
37760	CfaAffx.3536.1.S1_s_at	0.399275	2.86318
42877	CfaAffx.988.1.S1_s_at	0.398989	2.97954
15727	Cfa.6152.1.A1_at	0.398827	2.8827
17928	Cfa.8048.1.A1_at	0.398779	2.46898
15270	Cfa.5725.1.A1_at	0.398776	2.3969
16286	Cfa.6645.1.A1_at	0.398654	6.63417
15082	Cfa.5550.1.A1_at	0.398422	8.3296
2565	Cfa.122.1.S1_s_at	0.398261	3.30939
25241	CfaAffx.16351.1.S1_s_at	0.3981	7.76779
27119	CfaAffx.18657.1.S1_s_at	0.398003	4.23857
4622	Cfa.14057.1.A1_at	0.397863	3.46259
5521	Cfa.14897.1.A1_at	0.39782	5.46247
9890	Cfa.19832.1.S1_at	0.397652	4.21642
8408	Cfa.18230.1.S1_s_at	0.397515	5.47353
3820	Cfa.13309.1.A1_s_at	0.397388	5.24546
12451	Cfa.3042.1.A1_at	0.397376	2.73894
32712	CfaAffx.25539.1.S1_s_at	0.397033	2.46305
14184	Cfa.4760.1.A1_at	0.39699	5.72366
21476	CfaAffx.11799.1.S1_s_at	0.396981	5.7829
35793	CfaAffx.2935.1.S1_at	0.396882	2.6656
38793	CfaAffx.4795.1.S1_s_at	0.396811	2.87069
1253	Cfa.11052.1.A1_at	0.396725	3.21198
39713	CfaAffx.6012.1.S1_at	0.396569	3.02144
11232	Cfa.21321.1.S1_at	0.396324	5.42288
4669	Cfa.14095.2.S1_at	0.396019	2.63734
2846	Cfa.12427.1.A1_at	0.395977	11.0223
11715	Cfa.2368.1.A1_at	0.395844	4.24729
40719	CfaAffx.7225.1.S1_x_at	0.395838	11.2232
37224	CfaAffx.3116.1.S1_s_at	0.395717	5.99265
35481	CfaAffx.28990.1.S1_s_at	0.395639	3.56551
6559	Cfa.15826.1.S1_s_at	0.395535	8.57346
41204	CfaAffx.7851.1.S1_at	0.395352	5.33619
12393	Cfa.2989.1.S1_at	0.395341	5.94496
2983	Cfa.12547.1.A1_at	0.395274	6.89773
10730	Cfa.20797.1.S1_s_at	0.394892	2.88748
34088	CfaAffx.27247.1.S1_s_at	0.394742	4.07746
2133	Cfa.11841.1.A1_s_at	0.39465	3.58194
1661	Cfa.11424.1.A1_at	0.394637	2.61697
22039	CfaAffx.12466.1.S1_s_at	0.394514	6.65823
38412	CfaAffx.4330.1.S1_at	0.394477	4.51448
30214	CfaAffx.2242.1.S1_at	0.394292	4.86197
22514	CfaAffx.13019.1.S1_s_at	0.394245	9.54077
1101	Cfa.10901.1.A1_at	0.394233	7.95166
21311	CfaAffx.11588.1.S1_at	0.394212	5.5765
7821	Cfa.17605.1.S1_s_at	0.394187	7.10979
7887	Cfa.17687.1.S1_at	0.394166	4.63285
298	Cfa.10199.1.A1_at	0.394114	4.92725
9618	Cfa.19568.1.S1_at	0.393894	3.056
21333	CfaAffx.11613.1.S1_s_at	0.393701	5.44936
12778	Cfa.3380.1.S1_at	0.393654	7.10656
32250	CfaAffx.25003.1.S1_at	0.393534	3.16666
28398	CfaAffx.20218.1.S1_s_at	0.393311	5.21228
40967	CfaAffx.7541.1.S1_s_at	0.393291	3.9955
33698	CfaAffx.26742.1.S1_at	0.393227	6.53108
12669	Cfa.3260.1.A1_s_at	0.393052	3.55546
653	Cfa.10520.1.A1_at	0.392903	7.30435
17591	Cfa.7759.1.A1_at	0.392883	5.1316
21789	CfaAffx.12169.1.S1_at	0.392758	5.03847
11969	Cfa.2599.1.A1_at	0.392691	6.96987
4094	Cfa.13565.1.A1_at	0.392348	8.73808
17947	Cfa.8062.1.A1_at	0.392134	3.85979
33688	CfaAffx.26728.1.S1_s_at	0.391938	8.7774
20057	CfaAffx.10036.1.S1_at	0.391724	3.32834
23237	CfaAffx.13897.1.S1_s_at	0.391557	5.81577
20792	CfaAffx.1093.1.S1_at	0.391512	5.02231
13702	Cfa.4337.1.A1_at	0.391365	7.88366
20893	CfaAffx.11044.1.S1_s_at	0.391355	4.57502
1269	Cfa.11069.1.A1_s_at	0.391237	8.93589
42556	CfaAffx.9471.1.S1_s_at	0.39123	3.42601
39016	CfaAffx.5105.1.S1_s_at	0.391098	3.33596
5715	Cfa.15060.1.A1_a_at	0.39101	8.14647
23600	CfaAffx.14358.1.S1_at	0.390987	6.7859
13523	Cfa.4072.1.A1_at	0.390914	5.11531
32764	CfaAffx.25606.1.S1_s_at	0.39089	5.05417
3121	Cfa.12661.1.A1_at	0.390825	6.37641
12507	Cfa.3098.1.S1_at	0.390709	5.00049
7858	Cfa.17645.2.S1_s_at	0.390616	5.28868
18554	Cfa.8569.1.A1_at	0.390546	2.51541
4946	Cfa.14354.1.S1_at	0.39015	10.5514
20146	CfaAffx.10147.1.S1_at	0.390127	9.54267
40979	CfaAffx.756.1.S1_s_at	0.39011	5.48425
39327	CfaAffx.5534.1.S1_s_at	0.38995	4.68693
15990	Cfa.6379.1.A1_at	0.389747	5.14875
13018	Cfa.3602.1.S1_s_at	0.389644	5.93063
14477	Cfa.5020.1.A1_at	0.389482	5.09282
33680	CfaAffx.2672.1.S1_at	0.389348	3.79348
7548	Cfa.17238.1.S1_at	0.389296	8.22111
27459	CfaAffx.19068.1.S1_s_at	0.38896	9.81878
26358	CfaAffx.17711.1.S1_s_at	0.388946	5.30874
25402	CfaAffx.16568.1.S1_s_at	0.388577	6.63987
42676	CfaAffx.9615.1.S1_at	0.388553	5.4725
1560	Cfa.11338.1.A1_at	0.388284	4.4114
22145	CfaAffx.12597.1.S1_at	0.388053	2.55954
6192	Cfa.15494.1.A1_at	0.388001	4.13125
27880	CfaAffx.1959.1.S1_s_at	0.387985	2.68948
18262	Cfa.8335.1.A1_at	0.38796	3.94091
5321	Cfa.14706.1.A1_at	0.387845	6.95611
10471	Cfa.2042.1.A1_at	0.387411	4.77101
23090	CfaAffx.13694.1.S1_s_at	0.387329	4.20297
7742	Cfa.17462.1.S1_s_at	0.387253	2.73168
6435	Cfa.15712.1.A1_at	0.387079	6.69624
38773	CfaAffx.4770.1.S1_at	0.387041	5.86401
2209	Cfa.11907.1.A1_s_at	0.386884	5.81661
24377	CfaAffx.15304.1.S1_at	0.386876	3.71093
8263	Cfa.18086.1.S1_s_at	0.386872	4.14638
894	Cfa.10726.1.A1_s_at	0.386699	3.58993
6566	Cfa.15837.1.A1_at	0.386359	5.23906
22664	CfaAffx.13179.1.S1_s_at	0.386308	6.64177
1266	Cfa.11066.1.A1_at	0.386275	5.38644
23407	CfaAffx.1411.1.S1_s_at	0.38623	2.84339
10114	Cfa.20052.1.S1_s_at	0.386192	3.81153
30821	CfaAffx.23214.1.S1_at	0.386121	4.34105
460	Cfa.10349.1.A1_at	0.385995	5.83933
40095	CfaAffx.6492.1.S1_s_at	0.385957	2.63472
13265	Cfa.3803.1.S1_at	0.385893	2.62431
6441	Cfa.15716.1.A1_s_at	0.385686	4.48917
12798	Cfa.3402.2.A1_at	0.385176	4.77812
22277	CfaAffx.1276.1.S1_at	0.385016	4.43948
28891	CfaAffx.20794.1.S1_at	0.384901	3.81947
23117	CfaAffx.13735.1.S1_at	0.384862	2.39829
28700	CfaAffx.20577.1.S1_s_at	0.384774	5.65256
42220	CfaAffx.9056.1.S1_s_at	0.384559	5.89357
37637	CfaAffx.3387.1.S1_at	0.38446	3.48025
25765	CfaAffx.16998.1.S1_at	0.384436	2.93459
4698	Cfa.14120.1.A1_s_at	0.384399	6.41463
31627	CfaAffx.24242.1.S1_s_at	0.384384	4.68812
19939	Cfa.9902.1.A1_a_at	0.383904	4.11736
28754	CfaAffx.20653.1.S1_at	0.383823	4.76732
2321	Cfa.11999.1.A1_at	0.383728	2.52946
27614	CfaAffx.19255.1.S1_s_at	0.383565	2.75591
25529	CfaAffx.16726.1.S1_at	0.383362	6.33464
42797	CfaAffx.9764.1.S1_s_at	0.383196	3.74295
34037	CfaAffx.27180.1.S1_s_at	0.383033	2.41621
687	Cfa.10549.1.A1_at	0.382968	2.49854
28089	CfaAffx.19852.1.S1_s_at	0.382925	3.78094
30726	CfaAffx.2310.1.S1_s_at	0.382795	3.67629
42369	CfaAffx.9244.1.S1_at	0.382717	5.49539
11307	Cfa.2140.1.A1_s_at	0.382697	6.89651
9263	Cfa.19154.2.S1_at	0.382623	3.17978
19818	Cfa.9773.1.A1_at	0.382596	2.39534
2181	Cfa.11882.1.A1_at	0.382545	4.56524
36214	CfaAffx.29867.1.S1_at	0.382331	4.33178
9031	Cfa.18904.1.S1_s_at	0.382293	6.72416
42655	CfaAffx.9589.1.S1_s_at	0.382282	4.87179
16448	Cfa.6782.1.A1_at	0.382151	2.41934
5452	Cfa.14831.1.A1_at	0.382053	2.40037
4987	Cfa.1439.2.S1_at	0.382043	6.36702
31886	CfaAffx.24585.1.S1_at	0.38203	4.01487
15674	Cfa.6099.1.A1_at	0.381596	4.03836
2503	Cfa.12153.1.A1_at	0.381417	5.28775
1870	Cfa.11615.1.A1_at	0.381327	2.39425
35337	CfaAffx.28784.1.S1_s_at	0.381265	3.81388
25561	CfaAffx.16767.1.S1_at	0.38116	2.56753
4901	Cfa.14311.1.A1_at	0.38109	6.84023
8559	Cfa.18402.1.S1_s_at	0.381061	3.13907
21538	CfaAffx.11876.1.S1_at	0.380938	3.82972
7696	Cfa.17412.1.S1_s_at	0.380792	5.40012
19242	Cfa.9199.1.A1_at	0.380671	8.4629
9519	Cfa.19477.1.S1_at	0.380628	4.81548
32970	CfaAffx.2585.1.S1_s_at	0.380628	4.78423
36817	CfaAffx.30653.1.S1_at	0.380476	2.84715
22634	CfaAffx.13148.1.S1_at	0.38043	9.67937
3524	Cfa.13036.1.A1_s_at	0.380329	9.30021
11047	Cfa.21114.1.S1_s_at	0.380242	3.93754
19296	Cfa.9249.1.A1_at	0.379992	6.31348
33312	CfaAffx.26276.1.S1_at	0.379966	7.73302
38792	CfaAffx.4795.1.S1_at	0.379877	2.88514
42608	CfaAffx.9541.1.S1_s_at	0.37957	6.64847
9954	Cfa.19897.1.S1_s_at	0.379538	6.52871
34570	CfaAffx.27852.1.S1_at	0.379479	5.72833
2047	Cfa.11769.1.A1_at	0.379346	5.46517
2119	Cfa.11832.1.A1_a_at	0.379177	5.50636
39554	CfaAffx.5822.1.S1_at	0.37913	6.03336
25911	CfaAffx.17179.1.S1_at	0.379125	4.79028
16969	Cfa.7221.1.A1_at	0.379057	6.25652
14747	Cfa.5262.1.A1_at	0.378459	9.19776
40066	CfaAffx.6452.1.S1_s_at	0.378384	3.3707
21345	CfaAffx.11630.1.S1_s_at	0.378093	5.61589
10088	Cfa.20027.1.S1_s_at	0.377983	4.33561
37568	CfaAffx.3303.1.S1_s_at	0.37793	5.36745
1639	Cfa.11405.1.A1_at	0.377788	5.44425
35869	CfaAffx.29444.1.S1_s_at	0.377757	5.40494
26882	CfaAffx.18367.1.S1_at	0.377666	2.3948
38283	CfaAffx.4175.1.S1_at	0.377623	2.58587
31905	CfaAffx.24602.1.S1_s_at	0.37748	2.60879
20207	CfaAffx.10219.1.S1_at	0.3771	2.70804
29415	CfaAffx.21453.1.S1_s_at	0.377089	6.3514
6069	Cfa.15381.1.S1_at	0.377088	6.36901
11361	Cfa.21504.1.S1_s_at	0.377063	2.67804
36818	CfaAffx.30654.1.S1_at	0.377043	4.04873
22935	CfaAffx.13495.1.S1_s_at	0.376809	3.75975
27836	CfaAffx.19540.1.S1_at	0.376518	6.20786
11647	Cfa.2310.1.A1_at	0.376466	5.0558
4143	Cfa.13609.1.A1_s_at	0.376262	4.19765
12008	Cfa.2637.1.A1_at	0.376067	8.24165
11205	Cfa.21295.1.S1_s_at	0.375937	2.49282
26764	CfaAffx.18227.1.S1_at	0.375935	3.50922
7938	Cfa.17745.1.S1_s_at	0.375921	5.68292
37662	CfaAffx.3421.1.S1_s_at	0.375809	2.62327
17067	Cfa.7313.1.A1_at	0.375725	4.7735
22951	CfaAffx.13518.1.S1_at	0.375708	2.39275
5594	Cfa.14960.1.S1_at	0.375679	6.06627
12685	Cfa.328.1.S1_at	0.375335	5.87824
30196	CfaAffx.22403.1.S1_at	0.375262	4.32007
26699	CfaAffx.18144.1.S1_s_at	0.375233	7.46704
3112	Cfa.12653.3.A1_a_at	0.374962	4.95721
13565	Cfa.4130.1.S1_at	0.374959	7.76571
14798	Cfa.5308.1.A1_at	0.374932	2.49327
16670	Cfa.6967.1.A1_at	0.374645	2.9418
16910	Cfa.7175.1.A1_at	0.374587	7.20396
22814	CfaAffx.1335.1.S1_at	0.374366	3.24252
38526	CfaAffx.4480.1.S1_at	0.374289	2.92256
39176	CfaAffx.5343.1.S1_at	0.374271	2.39244
704	Cfa.10563.1.A1_at	0.374025	7.61239
32327	CfaAffx.25088.1.S1_at	0.373751	3.87186
853	Cfa.10687.1.S1_at	0.373734	6.4188
25703	CfaAffx.16929.1.S1_s_at	0.373415	7.12215
28443	CfaAffx.20279.1.S1_at	0.37334	6.21903
10383	Cfa.20318.1.S1_at	0.373057	6.38186
24714	CfaAffx.15712.1.S1_s_at	0.373005	4.48455
7546	Cfa.17235.1.S1_at	0.372887	6.3705
23804	CfaAffx.1462.1.S1_s_at	0.372778	8.32786
23896	CfaAffx.14744.1.S1_s_at	0.372764	3.74323
25742	CfaAffx.1697.1.S1_s_at	0.372259	10.497
28299	CfaAffx.20100.1.S1_at	0.372247	3.3645
9157	Cfa.19034.1.S1_s_at	0.372101	4.57221
28686	CfaAffx.20555.1.S1_s_at	0.372002	4.85136
29111	CfaAffx.21057.1.S1_at	0.371986	2.82049
31172	CfaAffx.23684.1.S1_s_at	0.371733	3.97868
8178	Cfa.17985.1.S1_s_at	0.371715	10.1499
7642	Cfa.17346.1.S1_s_at	0.371579	5.14373
29502	CfaAffx.21575.1.S1_s_at	0.371136	7.14138
9096	Cfa.18974.1.S1_at	0.370617	3.5376
36695	CfaAffx.30500.1.S1_at	0.370615	5.96423
4001	Cfa.13478.1.A1_s_at	0.370415	4.16486
11160	Cfa.21236.1.S1_s_at	0.37041	3.082
9154	Cfa.19031.1.S1_s_at	0.370405	3.39648
4032	Cfa.13505.1.A1_at	0.370287	2.42889
18970	Cfa.8918.1.A1_at	0.369933	6.58453
20142	CfaAffx.1014.1.S1_s_at	0.369897	3.72901
19312	Cfa.9268.1.S1_s_at	0.369823	5.28456
18389	Cfa.8435.1.A1_at	0.369778	6.85851
8165	Cfa.17967.1.S1_s_at	0.369712	3.11984
25393	CfaAffx.16558.1.S1_at	0.369673	8.10042
38321	CfaAffx.4223.1.S1_at	0.369579	7.529
32265	CfaAffx.25021.1.S1_at	0.369503	4.15543
5780	Cfa.15116.1.S1_s_at	0.369478	7.75625
22646	CfaAffx.1316.1.S1_s_at	0.369347	3.46756
31598	CfaAffx.24210.1.S1_at	0.369312	2.90882
10612	Cfa.20664.1.S1_at	0.369256	3.15207
22333	CfaAffx.12816.1.S1_at	0.369229	2.44765
122	Cfa.10009.1.A1_at	0.369202	4.42072
38413	CfaAffx.4331.1.S1_at	0.369039	4.25313
30287	CfaAffx.22520.1.S1_at	0.369014	5.17288
11630	Cfa.2296.1.A1_s_at	0.368921	7.78559
30744	CfaAffx.23121.1.S1_at	0.368777	10.4524
34577	CfaAffx.27859.1.S1_at	0.368506	4.72774
29872	CfaAffx.2202.1.S1_s_at	0.368462	6.53899
34173	CfaAffx.27347.1.S1_at	0.368258	5.86771
7179	Cfa.16754.1.S1_at	0.368091	4.91565
3974	Cfa.13451.1.A1_at	0.368006	2.46187
9726	Cfa.19672.1.S1_at	0.367741	3.66352
1694	Cfa.11453.1.A1_at	0.367558	8.29545
37525	CfaAffx.3255.1.S1_s_at	0.367485	4.51487
24862	CfaAffx.15899.1.S1_s_at	0.367428	6.07782
28658	CfaAffx.20520.1.S1_at	0.36741	4.99343
4644	Cfa.14074.1.A1_at	0.366947	6.37299
10676	Cfa.20734.1.S1_at	0.366939	2.4484
27922	CfaAffx.19644.1.S1_at	0.366874	3.48338
32114	CfaAffx.24857.1.S1_at	0.366846	2.53061
15620	Cfa.6048.1.A1_s_at	0.366833	4.08289
25976	CfaAffx.17257.1.S1_at	0.36664	3.07412
5244	Cfa.14629.1.S1_s_at	0.36663	6.29703
30971	CfaAffx.23409.1.S1_at	0.366626	4.01781
17069	Cfa.7315.1.A1_at	0.366572	3.03697
27801	CfaAffx.1950.1.S1_s_at	0.366361	4.66756
35167	CfaAffx.28574.1.S1_s_at	0.366319	4.34204
2189	Cfa.11889.1.A1_at	0.366258	3.0103
24548	CfaAffx.1551.1.S1_at	0.36597	5.43475
5306	Cfa.14688.1.A1_at	0.365577	3.67896
16788	Cfa.7066.1.S1_s_at	0.365566	5.24131
546	Cfa.10428.1.A1_at	0.365472	5.02116
39374	CfaAffx.5590.1.S1_at	0.365406	2.44095
10649	Cfa.20708.1.S1_at	0.365035	9.95332
20660	CfaAffx.10777.1.S1_at	0.365034	4.39327
36374	CfaAffx.30064.1.S1_s_at	0.364988	6.94063
42115	CfaAffx.8924.1.S1_at	0.364565	4.83115
23888	CfaAffx.14735.1.S1_at	0.364514	6.47634
26154	CfaAffx.17462.1.S1_at	0.364475	3.67072
34015	CfaAffx.27143.1.S1_s_at	0.364277	3.49787
31926	CfaAffx.24625.1.S1_at	0.36425	3.26707
12485	Cfa.3073.1.A1_at	0.364237	4.87468
26663	CfaAffx.18103.1.S1_at	0.364193	4.99391
27296	CfaAffx.18878.1.S1_s_at	0.363796	5.23233
28989	CfaAffx.20910.1.S1_s_at	0.363774	4.07999
28483	CfaAffx.2032.1.S1_at	0.363746	5.28087
32796	CfaAffx.25646.1.S1_at	0.363276	3.39762
1066	Cfa.10877.1.A1_at	0.36296	5.48004
11766	Cfa.2411.1.A1_at	0.362762	4.06282
22040	CfaAffx.12467.1.S1_s_at	0.362718	2.93391
26132	CfaAffx.17440.1.S1_at	0.362666	4.05038
38899	CfaAffx.4939.1.S1_s_at	0.362639	2.3945
491	Cfa.10377.1.S1_at	0.362637	6.86029
9978	Cfa.19921.1.S1_at	0.362619	2.88374
3370	Cfa.12884.1.S1_at	0.362529	6.37506
6612	Cfa.15954.1.S1_at	0.362365	7.56291
42813	CfaAffx.9786.1.S1_s_at	0.362356	7.16274
10213	Cfa.20148.1.S1_s_at	0.362194	6.61412
36832	CfaAffx.30668.1.S1_s_at	0.362149	2.96865
19581	Cfa.9526.1.A1_s_at	0.36202	7.45682
27629	CfaAffx.19272.1.S1_at	0.361772	2.97693
7765	Cfa.17544.1.S1_at	0.361706	7.06021
36433	CfaAffx.30151.1.S1_at	0.361682	3.66721
30627	CfaAffx.22979.1.S1_s_at	0.361604	6.34111
7346	Cfa.16983.1.S1_s_at	0.360987	4.5915
4104	Cfa.13573.1.A1_s_at	0.360979	2.40213
40141	CfaAffx.6555.1.S1_at	0.36084	5.54999
35806	CfaAffx.2936.1.S1_at	0.360792	4.80367
34625	CfaAffx.27907.1.S1_at	0.360757	2.39019
3334	Cfa.1285.1.A1_at	0.360671	10.7978
10638	Cfa.20696.1.S1_s_at	0.360666	4.903
25497	CfaAffx.16692.1.S1_s_at	0.360415	3.20695
24082	CfaAffx.14947.1.S1_at	0.360367	4.31268
39044	CfaAffx.5148.1.S1_at	0.360309	2.98837
22101	CfaAffx.12540.1.S1_at	0.360285	7.1287
24823	CfaAffx.15851.1.S1_at	0.360279	4.4039
9891	Cfa.19832.1.S1_x_at	0.360213	4.46495
39586	CfaAffx.5866.1.S1_s_at	0.359831	3.38441
5931	Cfa.15241.2.S1_s_at	0.359791	5.84503
2936	Cfa.12506.1.A1_s_at	0.35977	6.06213
6292	Cfa.15585.1.A1_at	0.359484	5.4228
7466	Cfa.17134.1.S1_s_at	0.359454	3.15483
4562	Cfa.14002.1.A1_at	0.359276	2.5648
12884	Cfa.3488.1.S1_s_at	0.359252	6.99773
10732	Cfa.20799.1.S1_at	0.35923	6.38115
8577	Cfa.18421.1.S1_s_at	0.359139	4.65162
8503	Cfa.18343.1.S1_at	0.359085	5.2117
23580	CfaAffx.14325.1.S1_at	0.359006	4.06473
18437	Cfa.8473.1.A1_s_at	0.358913	7.5252
1190	Cfa.10989.1.S1_at	0.358894	8.37755
33383	CfaAffx.26368.1.S1_s_at	0.358891	7.45966
33715	CfaAffx.26760.1.S1_s_at	0.358884	3.01552
21166	CfaAffx.11383.1.S1_s_at	0.358695	6.39228
22206	CfaAffx.1267.1.S1_at	0.358676	2.42673
14713	Cfa.5232.1.A1_at	0.358572	2.74844
8293	Cfa.18122.1.S1_s_at	0.358438	3.78666
6681	Cfa.16087.1.S1_at	0.35843	10.3398
36927	CfaAffx.30797.1.S1_s_at	0.358396	5.12019
20299	CfaAffx.10315.1.S1_s_at	0.358029	4.00199
30754	CfaAffx.23133.1.S1_at	0.357958	3.71559
27068	CfaAffx.18599.1.S1_at	0.357757	5.48277
11701	Cfa.2355.1.A1_at	0.357679	2.39794
27412	CfaAffx.19020.1.S1_at	0.357431	5.30615
21680	CfaAffx.12031.1.S1_at	0.357384	4.76433
24009	CfaAffx.14862.1.S1_at	0.357346	4.46148
14938	Cfa.5423.1.A1_s_at	0.357292	2.53951
4589	Cfa.14028.1.A1_at	0.357225	3.07164
14659	Cfa.5187.1.A1_at	0.357219	6.99653
791	Cfa.10632.1.S1_at	0.357198	6.02336
29575	CfaAffx.21663.1.S1_at	0.357088	4.60108
21935	CfaAffx.12340.1.S1_at	0.356929	4.11786
39435	CfaAffx.5673.1.S1_at	0.356815	6.01922
14164	Cfa.4743.1.A1_at	0.356755	7.0674
4690	Cfa.14114.1.A1_at	0.356573	3.87272
9681	Cfa.19625.1.S1_s_at	0.356347	6.19876
38596	CfaAffx.4564.1.S1_at	0.355926	3.11918
12389	Cfa.2982.1.S1_s_at	0.355921	4.13072
26811	CfaAffx.18287.1.S1_at	0.355869	2.56368
40668	CfaAffx.7160.1.S1_s_at	0.355825	6.80694
32902	CfaAffx.25763.1.S1_at	0.355537	6.68772
17561	Cfa.7734.2.S1_at	0.35524	8.44269
5511	Cfa.14889.1.A1_at	0.355237	5.91839
3369	Cfa.12883.1.A1_x_at	0.354818	7.32847
37972	CfaAffx.3804.1.S1_at	0.354689	5.63446
18761	Cfa.8736.1.A1_x_at	0.354536	3.76507
11976	Cfa.2606.1.S1_at	0.354463	7.69511
5	AFFX-BioC-5_at	0.354157	8.11518
6476	Cfa.15742.1.A1_at	0.353952	6.8806
5120	Cfa.14525.1.S1_at	0.353933	4.56351
780	Cfa.1062.1.A1_at	0.353861	4.64903
42831	CfaAffx.9808.1.S1_at	0.353828	8.10486
30447	CfaAffx.22731.1.S1_s_at	0.353545	3.04167
26601	CfaAffx.18020.1.S1_at	0.353445	3.89872
3999	Cfa.13476.1.A1_s_at	0.353375	6.05348
26312	CfaAffx.17658.1.S1_at	0.353319	5.27046
21936	CfaAffx.12341.1.S1_s_at	0.353256	3.3932
6211	Cfa.15510.1.A1_at	0.353177	6.58599
37888	CfaAffx.3707.1.S1_s_at	0.353154	4.08093
20292	CfaAffx.10308.1.S1_at	0.352904	4.60633
12056	Cfa.268.2.S1_s_at	0.352747	4.59606
19686	Cfa.9639.1.A1_at	0.352714	5.28149
32829	CfaAffx.25687.1.S1_at	0.35267	6.03957
1376	Cfa.1117.1.A1_at	0.352359	3.43325
21361	CfaAffx.11654.1.S1_at	0.352344	2.78785
4556	Cfa.14.1.A1_at	0.352322	9.30579
19205	Cfa.9156.1.A1_at	0.352262	4.44312
4280	Cfa.13730.1.A1_at	0.35226	6.34982
36244	CfaAffx.29910.1.S1_s_at	0.352217	5.55619
23040	CfaAffx.13627.1.S1_s_at	0.352081	4.96965
567	Cfa.10451.1.S1_at	0.351819	5.85878
37816	CfaAffx.3612.1.S1_s_at	0.351588	2.81485
31476	CfaAffx.24052.1.S1_s_at	0.351446	3.53326
9396	Cfa.19348.1.A1_s_at	0.351432	4.57205
17414	Cfa.7608.2.A1_a_at	0.351345	2.38862
2340	Cfa.12010.1.A1_at	0.35127	7.18939
1416	Cfa.1121.1.S1_at	0.350691	5.86108
8421	Cfa.18243.1.S1_s_at	0.35069	5.64889
21423	CfaAffx.11731.1.S1_at	0.35067	5.92181
8867	Cfa.18721.1.S1_s_at	0.350463	5.53577
32725	CfaAffx.25550.1.S1_at	0.35014	4.11811
36598	CfaAffx.30373.1.S1_at	0.350134	2.55338
332	Cfa.10229.1.A1_s_at	0.349651	6.01011
22108	CfaAffx.1255.1.S1_s_at	0.349629	2.53084
5467	Cfa.14843.1.A1_at	0.34959	4.51619
41344	CfaAffx.8010.1.S1_at	0.349505	6.48652
20933	CfaAffx.11093.1.S1_at	0.349101	6.02339
33925	CfaAffx.27035.1.S1_at	0.349088	6.26598
25277	CfaAffx.16402.1.S1_s_at	0.349034	8.45353
8338	Cfa.18164.1.S1_at	0.348751	5.83463
5626	Cfa.14987.1.A1_at	0.348711	6.6223
22318	CfaAffx.1280.1.S1_at	0.348709	4.70785
13034	Cfa.3619.1.S1_at	0.348695	8.49207
5455	Cfa.14834.1.A1_at	0.348577	3.23448
23696	CfaAffx.14486.1.S1_at	0.348549	4.78577
21818	CfaAffx.12207.1.S1_s_at	0.348323	4.8269
19159	Cfa.9110.1.A1_s_at	0.348208	5.38567
40932	CfaAffx.7495.1.S1_s_at	0.347875	4.002
12735	Cfa.3334.1.A1_s_at	0.347839	7.32176
10935	Cfa.20996.1.S1_at	0.347827	11.6909
26577	CfaAffx.17995.1.S1_at	0.347767	2.73229
14628	Cfa.5159.1.A1_at	0.347716	2.65232
13862	Cfa.4511.1.A1_at	0.347662	3.13405
40475	CfaAffx.6931.1.S1_s_at	0.347627	2.67605
32990	CfaAffx.25872.1.S1_at	0.34762	2.58847
11342	Cfa.21483.1.S1_s_at	0.347198	3.25317
26322	CfaAffx.17668.1.S1_s_at	0.346869	3.89689
19389	Cfa.9345.1.S1_at	0.346841	2.39313
8940	Cfa.18798.2.S1_at	0.346772	2.39047
40825	CfaAffx.7369.1.S1_s_at	0.346752	6.07309
15706	Cfa.613.1.A1_at	0.346608	3.84403
7293	Cfa.1691.1.A1_at	0.3466	7.29206
20372	CfaAffx.1041.1.S1_at	0.346588	7.00127
27943	CfaAffx.19669.1.S1_s_at	0.346471	2.73173
10789	Cfa.20856.1.S1_at	0.346298	4.30014
9202	Cfa.19106.1.S1_at	0.346188	6.1528
7969	Cfa.17772.1.S1_s_at	0.346154	4.01589
17922	Cfa.8042.1.A1_at	0.346097	6.99611
11202	Cfa.21291.1.S1_at	0.346059	6.64172
32953	CfaAffx.25835.1.S1_s_at	0.346011	2.842
37689	CfaAffx.3453.1.S1_at	0.345877	3.8318
25654	CfaAffx.16873.1.S1_at	0.345729	3.96322
13357	Cfa.3879.1.S1_s_at	0.345693	6.45706
14912	Cfa.540.1.A1_at	0.345635	2.38767
37708	CfaAffx.3476.1.S1_s_at	0.345274	3.7815
6708	Cfa.16144.1.S1_at	0.345002	5.25928
18654	Cfa.8648.1.A1_s_at	0.344788	2.72156
537	Cfa.10418.1.A1_at	0.344775	4.91437
12235	Cfa.2839.1.A1_at	0.344733	3.90646
36830	CfaAffx.30666.1.S1_at	0.34466	2.8115
26483	CfaAffx.17875.1.S1_at	0.344367	5.28002
26171	CfaAffx.17483.1.S1_s_at	0.34429	7.1588
27631	CfaAffx.19275.1.S1_s_at	0.344149	4.85995
35156	CfaAffx.28562.1.S1_s_at	0.344064	2.68329
485	Cfa.10373.1.S1_s_at	0.34398	6.38995
41903	CfaAffx.8688.1.S1_s_at	0.343966	3.94572
4511	Cfa.13955.1.A1_at	0.3439	2.96427
13872	Cfa.4515.2.A1_at	0.34374	2.43155
34510	CfaAffx.27772.1.S1_s_at	0.343732	4.99085
1344	Cfa.11138.1.A1_at	0.343677	7.36264
8999	Cfa.18875.1.S1_s_at	0.343587	4.07981
7905	Cfa.17708.1.S1_s_at	0.343536	3.11529
5814	Cfa.15148.1.A1_at	0.343467	6.23405
36084	CfaAffx.29711.1.S1_at	0.34346	5.64017
13235	Cfa.378.1.S1_at	0.343459	8.25275
31500	CfaAffx.24088.1.S1_at	0.343456	2.68228
41188	CfaAffx.7835.1.S1_at	0.343184	3.20568
25566	CfaAffx.16774.1.S1_s_at	0.34314	4.41494
10849	Cfa.20917.1.S1_s_at	0.343088	2.98916
4553	Cfa.13997.1.A1_at	0.34302	2.38723
3597	Cfa.13098.1.A1_s_at	0.34301	8.70595
36377	CfaAffx.3007.1.S1_at	0.343006	2.43487
36913	CfaAffx.30776.1.S1_s_at	0.342742	2.97497
26478	CfaAffx.17868.1.S1_at	0.342643	9.87249
22200	CfaAffx.12658.1.S1_s_at	0.342577	4.90323
7190	Cfa.16765.1.S1_at	0.342485	4.37669
33766	CfaAffx.26841.1.S1_at	0.342385	2.38712
26458	CfaAffx.17840.1.S1_s_at	0.342172	6.94693
5721	Cfa.15066.1.S1_at	0.342111	6.64702
13446	Cfa.3962.1.A1_at	0.341925	2.79508
17303	Cfa.7512.1.S1_at	0.341699	3.61781
7632	Cfa.17338.1.S1_at	0.34153	4.72483
13482	Cfa.400.1.A1_at	0.341429	4.14431
20640	CfaAffx.10748.1.S1_at	0.341283	5.61378
1448	Cfa.11241.1.A1_at	0.341231	8.45591
7731	Cfa.17450.1.S1_s_at	0.341184	4.66605
2811	Cfa.1240.1.A1_at	0.341047	3.83369
12279	Cfa.2880.1.S1_a_at	0.341012	9.15205
8182	Cfa.1799.1.A1_s_at	0.340832	6.03999
2855	Cfa.12435.1.A1_at	0.340694	4.1226
42489	CfaAffx.9380.1.S1_s_at	0.340691	3.84258
39161	CfaAffx.5316.1.S1_at	0.34058	2.95748
8493	Cfa.18333.1.S1_s_at	0.34054	6.262
37357	CfaAffx.3140.1.S1_at	0.339733	3.98427
38540	CfaAffx.4498.1.S1_at	0.33929	5.6627
35655	CfaAffx.29203.1.S1_s_at	0.339267	2.57498
2107	Cfa.11821.1.A1_s_at	0.338568	4.23254
7196	Cfa.16772.1.A1_at	0.338567	9.51154
10972	Cfa.21028.1.S1_s_at	0.338536	3.91474
461	Cfa.10351.1.A1_a_at	0.338472	5.30432
39057	CfaAffx.5161.1.S1_at	0.338281	7.24826
11993	Cfa.2622.1.S1_at	0.338253	6.10822
23819	CfaAffx.14641.1.S1_s_at	0.338212	4.97414
4223	Cfa.13680.1.A1_at	0.338163	3.40531
24406	CfaAffx.15335.1.S1_at	0.338021	4.19938
8002	Cfa.17805.1.S1_at	0.337771	8.16102
19452	Cfa.9400.1.A1_at	0.337604	2.7432
32444	CfaAffx.25229.1.S1_at	0.33759	4.72391
41527	CfaAffx.8231.1.S1_at	0.337557	2.48469
31814	CfaAffx.2448.1.S1_at	0.337545	4.15033
324	Cfa.10220.1.S1_at	0.337477	5.7297
4196	Cfa.13656.1.A1_at	0.337413	4.09306
6683	Cfa.16089.1.S1_at	0.337175	6.05086
33177	CfaAffx.26122.1.S1_s_at	0.337175	4.87164
13508	Cfa.404.1.S1_s_at	0.336941	5.08942
21090	CfaAffx.11275.1.S1_s_at	0.33688	7.85821
11012	Cfa.21067.1.S1_at	0.336861	6.27393
7816	Cfa.17601.1.S1_s_at	0.336689	5.22768
35151	CfaAffx.28557.1.S1_s_at	0.336683	5.10547
22521	CfaAffx.13028.1.S1_at	0.336681	4.43717
6923	Cfa.16388.3.A1_x_at	0.33667	6.33516
15439	Cfa.5878.1.A1_at	0.336501	2.53199
17569	Cfa.7740.1.A1_a_at	0.336453	6.29878
18988	Cfa.8939.1.A1_at	0.336295	2.95305
7066	Cfa.16590.1.S2_at	0.336248	3.46537
9475	Cfa.19436.1.S1_at	0.336187	2.86739
37992	CfaAffx.3826.1.S1_s_at	0.33602	5.64654
28360	CfaAffx.20169.1.S1_s_at	0.336001	4.02287
29473	CfaAffx.21536.1.S1_at	0.335915	8.07082
35279	CfaAffx.28721.1.S1_s_at	0.335714	4.97523
36428	CfaAffx.30146.1.S1_at	0.335675	3.06224
119	Cfa.10006.1.A1_at	0.335592	3.34276
15811	Cfa.6225.1.A1_at	0.335588	6.81161
39035	CfaAffx.5137.1.S1_at	0.335517	2.38787
26996	CfaAffx.1851.1.S1_s_at	0.335362	2.92599
24007	CfaAffx.1486.1.S1_s_at	0.335304	4.13252
24704	CfaAffx.15697.1.S1_at	0.335278	9.00376
22518	CfaAffx.13025.1.S1_at	0.335095	5.9299
14080	Cfa.467.1.S1_at	0.335091	3.66383
27235	CfaAffx.18785.1.S1_at	0.335014	6.0348
15504	Cfa.5936.1.A1_at	0.334961	2.46927
41923	CfaAffx.8707.1.S1_s_at	0.334953	7.18498
27918	CfaAffx.19637.1.S1_at	0.334742	2.93431
36043	CfaAffx.29666.1.S1_at	0.334679	2.47212
42315	CfaAffx.9177.1.S1_at	0.334642	5.47026
18856	Cfa.8811.1.A1_at	0.334433	7.148
34971	CfaAffx.28314.1.S1_at	0.334382	4.11975
32329	CfaAffx.25091.1.S1_s_at	0.33434	5.03923
23012	CfaAffx.13595.1.S1_s_at	0.334245	7.62195
22434	CfaAffx.12930.1.S1_at	0.334124	4.9038
41346	CfaAffx.8012.1.S1_at	0.333934	2.38684
35892	CfaAffx.29487.1.S1_at	0.333726	3.19463
1281	Cfa.11079.1.A1_at	0.333634	6.24097
21885	CfaAffx.12277.1.S1_at	0.333581	4.52235
9704	Cfa.1965.1.S1_at	0.333475	4.34393
7945	Cfa.17750.1.S1_s_at	0.333439	6.43112
24504	CfaAffx.15454.1.S1_at	0.333381	2.73323
34874	CfaAffx.28188.1.S1_at	0.333224	5.86093
32124	CfaAffx.24865.1.S1_s_at	0.33301	4.70532
11600	Cfa.2270.2.S1_at	0.332954	4.63239
10752	Cfa.20819.1.S1_at	0.332929	9.08887
30733	CfaAffx.23108.1.S1_s_at	0.332914	5.28098
31629	CfaAffx.24250.1.S1_s_at	0.332872	6.08026
26715	CfaAffx.18161.1.S1_s_at	0.332834	7.70036
7429	Cfa.17089.2.S1_at	0.33278	3.73117
31651	CfaAffx.24279.1.S1_s_at	0.332762	4.24968
9518	Cfa.19476.1.S1_s_at	0.332693	4.45541
42713	CfaAffx.9656.1.S1_s_at	0.332651	3.64887
14856	Cfa.5354.1.A1_s_at	0.332651	9.01113
5844	Cfa.15172.1.A1_at	0.332645	5.64657
18750	Cfa.8728.1.A1_at	0.332519	2.41714
15551	Cfa.598.1.S1_s_at	0.332494	6.28903
15087	Cfa.5555.1.A1_at	0.332489	6.65184
37528	CfaAffx.3258.1.S1_at	0.332118	4.13123
15850	Cfa.6259.1.A1_at	0.332078	7.08144
7259	Cfa.16858.1.S1_at	0.332074	4.74809
35479	CfaAffx.28989.1.S1_s_at	0.331628	5.90615
39103	CfaAffx.5232.1.S1_s_at	0.33155	5.10814
6492	Cfa.1576.1.A1_at	0.331472	2.93279
42881	CfaAffx.9883.1.S1_at	0.331423	5.57799
38844	CfaAffx.4872.1.S1_at	0.331408	2.39981
3322	Cfa.1284.2.S1_at	0.331351	3.11026
29721	CfaAffx.21831.1.S1_s_at	0.331129	4.90763
11350	Cfa.21492.1.S1_x_at	0.331103	2.65302
14205	Cfa.4778.1.A1_at	0.330997	9.95386
4604	Cfa.14042.1.A1_at	0.330974	3.24108
3031	Cfa.1259.1.S1_s_at	0.330872	5.30417
12948	Cfa.3547.1.A1_at	0.330868	2.62844
38019	CfaAffx.3866.1.S1_s_at	0.330772	3.01146
32622	CfaAffx.25436.1.S1_at	0.330728	4.37716
20177	CfaAffx.10180.1.S1_at	0.330697	5.69064
18926	Cfa.8877.1.A1_at	0.33055	8.44197
40818	CfaAffx.736.1.S1_at	0.330407	3.11911
524	Cfa.10409.1.A1_at	0.330371	2.56267
35958	CfaAffx.29558.1.S1_s_at	0.330032	3.03201
20597	CfaAffx.10692.1.S1_s_at	0.330028	2.84357
12813	Cfa.3419.1.A1_at	0.33002	2.69728
31767	CfaAffx.24417.1.S1_at	0.329819	2.89237
15075	Cfa.5544.1.A1_at	0.329713	8.20215
3661	Cfa.13158.1.A1_s_at	0.329497	5.66754
16803	Cfa.7077.1.A1_s_at	0.329398	5.59061
31374	CfaAffx.23941.1.S1_s_at	0.329297	6.05084
6119	Cfa.15423.1.A1_at	0.329199	4.76714
5889	Cfa.15208.1.A1_at	0.329199	5.24192
8062	Cfa.17860.1.S1_s_at	0.329167	3.63365
33285	CfaAffx.26251.1.S1_at	0.329056	2.51747
39639	CfaAffx.5923.1.S1_s_at	0.329036	5.26998
9877	Cfa.1982.1.S1_at	0.328998	3.07386
13618	Cfa.4221.1.S1_at	0.328946	2.43214
14970	Cfa.5454.1.A1_at	0.328931	3.20745
148	Cfa.10040.1.A1_at	0.328747	2.38485
20558	CfaAffx.10638.1.S1_at	0.328743	3.14643
7616	Cfa.17319.1.S1_s_at	0.328698	2.66561
37836	CfaAffx.3637.1.S1_at	0.328689	2.84786
41590	CfaAffx.8304.1.S1_at	0.328469	5.70943
39169	CfaAffx.5330.1.S1_at	0.328401	5.13355
24204	CfaAffx.15108.1.S1_at	0.328395	3.44554
23605	CfaAffx.14363.1.S1_at	0.328346	6.05773
9375	Cfa.1932.1.A1_at	0.328286	4.10329
1219	Cfa.11017.1.A1_at	0.328147	7.87429
35170	CfaAffx.28578.1.S1_at	0.328077	3.09779
30110	CfaAffx.22308.1.S1_at	0.327989	2.50599
41298	CfaAffx.7968.1.S1_at	0.327975	2.39046
5973	Cfa.15283.1.A1_at	0.327957	4.55714
7350	Cfa.16986.1.S1_at	0.327943	4.03167
8992	Cfa.18863.1.S1_s_at	0.327862	5.10971
20120	CfaAffx.10117.1.S1_s_at	0.327743	6.71392
39838	CfaAffx.6184.1.S1_at	0.327657	2.41028
16571	Cfa.6886.1.S1_s_at	0.327596	3.7035
692	Cfa.10555.1.A1_at	0.327381	6.2989
23610	CfaAffx.14368.1.S1_at	0.327191	2.49399
20471	CfaAffx.10521.1.S1_s_at	0.327145	3.45156
6771	Cfa.16232.1.S1_s_at	0.327131	2.61801
10749	Cfa.20815.1.S1_s_at	0.327079	4.24352
18068	Cfa.8167.1.S1_at	0.327007	2.60258
1477	Cfa.11267.1.A1_at	0.326892	2.44746
23020	CfaAffx.13601.1.S1_at	0.326871	5.16074
9228	Cfa.19130.1.S1_s_at	0.326861	5.31597
27829	CfaAffx.19532.1.S1_s_at	0.326669	4.72106
9635	Cfa.19585.1.A1_at	0.326629	6.13222
24916	CfaAffx.15966.1.S1_at	0.326629	2.73195
8479	Cfa.18318.1.S1_s_at	0.326531	4.6852
31270	CfaAffx.23811.1.S1_at	0.326513	5.46251
11810	Cfa.2453.1.A1_at	0.326512	6.94646
19146	Cfa.910.1.A1_at	0.326442	7.92235
34281	CfaAffx.27481.1.S1_at	0.326437	2.49307
26955	CfaAffx.18464.1.S1_at	0.326433	7.67131
24338	CfaAffx.15257.1.S1_at	0.326351	2.74849
18219	Cfa.8300.1.A1_at	0.326244	3.20155
12441	Cfa.3034.1.A1_at	0.326236	4.80873
27184	CfaAffx.18720.1.S1_s_at	0.32623	4.41416
31107	CfaAffx.23592.1.S1_s_at	0.326228	4.57314
7388	Cfa.17033.1.S1_at	0.326113	3.98593
7705	Cfa.17422.1.S1_at	0.326071	6.05162
16912	Cfa.7176.1.A1_s_at	0.326036	5.38169
36810	CfaAffx.30644.1.S1_at	0.325937	5.15323
10870	Cfa.20934.1.S1_s_at	0.325889	5.56036
2333	Cfa.12007.1.A1_at	0.325833	7.65325
7932	Cfa.17738.1.S1_s_at	0.325832	3.42969
2437	Cfa.12093.1.A1_at	0.325808	4.2803
8973	Cfa.18836.1.S1_at	0.325795	2.5562
12227	Cfa.2831.3.S1_a_at	0.325451	6.01184
20512	CfaAffx.10576.1.S1_s_at	0.325235	7.55809
38080	CfaAffx.3938.1.S1_at	0.325143	4.28488
30557	CfaAffx.22881.1.S1_s_at	0.32506	3.68487
33046	CfaAffx.25953.1.S1_at	0.325059	7.13
29298	CfaAffx.21308.1.S1_s_at	0.325016	6.87388
22035	CfaAffx.12461.1.S1_at	0.324864	6.45545
25786	CfaAffx.1702.1.S1_s_at	0.324757	6.8634
7818	Cfa.17603.1.S1_at	0.324692	4.16836
20810	CfaAffx.10950.1.S1_s_at	0.324647	5.77475
27765	CfaAffx.19439.1.S1_s_at	0.324572	7.33875
33343	CfaAffx.26314.1.S1_s_at	0.324555	4.61446
30904	CfaAffx.2332.1.S1_at	0.324473	4.06686
12193	Cfa.2802.1.S1_at	0.324367	5.27544
940	Cfa.10768.1.S1_at	0.324259	4.622
30329	CfaAffx.22578.1.S1_s_at	0.324226	2.5264
32011	CfaAffx.24752.1.S1_s_at	0.324087	6.07025
19630	Cfa.9576.1.S1_at	0.323917	5.88832
36282	CfaAffx.29952.1.S1_at	0.32391	3.68322
25251	CfaAffx.16368.1.S1_at	0.3238	4.75013
21227	CfaAffx.11468.1.S1_at	0.323639	4.76796
17492	Cfa.7678.1.A1_at	0.323548	2.61762
14885	Cfa.5377.1.A1_s_at	0.323547	4.62861
4426	Cfa.13870.1.A1_at	0.323495	4.3773
20634	CfaAffx.10741.1.S1_s_at	0.323485	4.71528
25668	CfaAffx.16887.1.S1_s_at	0.323345	7.52384
25166	CfaAffx.16260.1.S1_at	0.323269	2.98368
2876	Cfa.12453.1.A1_at	0.323267	6.82612
42780	CfaAffx.9743.1.S1_at	0.323212	2.90177
19361	Cfa.9321.1.A1_at	0.3232	6.41862
14744	Cfa.526.1.A1_at	0.323181	3.37899
8887	Cfa.18745.1.S1_s_at	0.323084	4.83232
33585	CfaAffx.26603.1.S1_s_at	0.322897	3.91725
19953	Cfa.9919.1.A1_at	0.322895	3.05782
36635	CfaAffx.3043.1.S1_s_at	0.322851	6.80177
14235	Cfa.4801.1.A1_at	0.322815	2.6786
41568	CfaAffx.8275.1.S1_at	0.322793	3.80281
3281	Cfa.12802.1.A1_s_at	0.322793	6.32204
13014	Cfa.360.1.A1_at	0.322682	6.29105
17273	Cfa.749.1.A1_s_at	0.322509	10.2512
37592	CfaAffx.3336.1.S1_at	0.32244	5.45475
32372	CfaAffx.25144.1.S1_s_at	0.322406	2.69687
42677	CfaAffx.9617.1.S1_s_at	0.32228	2.71612
31335	CfaAffx.23897.1.S1_at	0.32228	5.30071
8448	Cfa.18282.1.S1_s_at	0.321976	2.81737
42847	CfaAffx.983.1.S1_s_at	0.321952	5.78432
6634	Cfa.15993.1.S1_at	0.321911	5.26074
32077	CfaAffx.24824.1.S1_at	0.321884	6.80457
36592	CfaAffx.30367.1.S1_at	0.321865	4.78521
18618	Cfa.8613.1.A1_at	0.321819	7.47134
6808	Cfa.1627.1.S1_at	0.321768	2.77781
23844	CfaAffx.14670.1.S1_s_at	0.321679	6.41302
12038	Cfa.2666.1.S1_at	0.32154	4.23293
34356	CfaAffx.27576.1.S1_at	0.321444	3.48477
1794	Cfa.11547.1.A1_s_at	0.321394	6.41242
15264	Cfa.572.1.S1_at	0.321132	4.6889
26258	CfaAffx.17599.1.S1_at	0.321007	5.59773
15622	Cfa.605.1.S1_at	0.320828	5.28608
40187	CfaAffx.6611.1.S1_s_at	0.320802	8.29555
34806	CfaAffx.2811.1.S1_s_at	0.320772	4.26758
10793	Cfa.20861.1.S1_at	0.320379	4.64267
36300	CfaAffx.29978.1.S1_at	0.320352	2.61691
6121	Cfa.15426.1.A1_at	0.31984	2.93037
30722	CfaAffx.23094.1.S1_at	0.319781	4.87709
33818	CfaAffx.26906.1.S1_s_at	0.319717	3.42905
37993	CfaAffx.3828.1.S1_at	0.319659	4.03828
4830	Cfa.14245.1.A1_s_at	0.319655	2.42908
26991	CfaAffx.18503.1.S1_at	0.319518	2.55356
4783	Cfa.14200.1.A1_s_at	0.319455	5.37756
31875	CfaAffx.2457.1.S1_s_at	0.319433	7.18126
34984	CfaAffx.28326.1.S1_s_at	0.319257	5.72923
[truncated: 41,036 more rows]

## Sheet: Contrast4 (d)
	ID	M	A
24163	CfaAffx.15042.1.S1_s_at	7.24826	6.42364
38124	CfaAffx.3994.1.S1_s_at	7.15515	8.63118
38135	CfaAffx.4011.1.S1_at	6.06513	7.18665
23153	CfaAffx.13785.1.S1_s_at	5.48827	7.75869
40963	CfaAffx.7537.1.S1_at	4.43788	6.17029
19289	Cfa.9240.1.S1_at	4.36573	5.12581
15943	Cfa.6344.1.A1_at	4.31118	5.43166
16030	Cfa.6413.1.A1_at	4.25944	6.64866
8902	Cfa.18759.2.S1_at	4.189	5.98358
23152	CfaAffx.13785.1.S1_at	4.11968	8.82346
722	Cfa.10574.1.A1_at	3.80573	5.22881
13686	Cfa.432.1.A1_at	3.7646	6.49706
2938	Cfa.12506.3.S1_at	3.74653	4.79687
24881	CfaAffx.15920.1.S1_s_at	3.69881	6.04097
16800	Cfa.7074.1.A1_at	3.67611	8.05074
27459	CfaAffx.19068.1.S1_s_at	3.58806	9.81865
2654	Cfa.12271.1.A1_at	3.5488	6.58013
1483	Cfa.11274.1.A1_at	3.54174	7.37315
27458	CfaAffx.19068.1.S1_at	3.5298	8.45523
33127	CfaAffx.26061.1.S1_at	3.2565	7.7169
11800	Cfa.2445.1.S1_at	3.19324	5.18743
12467	Cfa.306.1.S1_at	3.19194	5.03239
24315	CfaAffx.15227.1.S1_s_at	3.02769	10.3891
2930	Cfa.12501.1.A1_at	3.0011	11.6542
10452	Cfa.20396.1.S1_at	2.99088	7.86567
24862	CfaAffx.15899.1.S1_s_at	2.90505	6.07761
908	Cfa.10739.1.A1_s_at	2.89954	5.52046
6884	Cfa.16351.1.S1_at	2.78321	4.50101
28941	CfaAffx.20845.1.S1_s_at	2.76227	5.3754
2901	Cfa.12476.1.A1_at	2.73954	4.16375
14600	Cfa.5134.1.A1_s_at	2.59151	5.60472
16384	Cfa.6729.1.A1_at	2.57703	7.67408
29985	CfaAffx.22155.1.S1_s_at	2.55453	7.63441
816	Cfa.10651.1.A1_at	2.54044	7.66798
11824	Cfa.2469.1.S1_at	2.53127	6.49129
1409	Cfa.11200.1.A1_at	2.50814	3.93847
15329	Cfa.5781.1.A1_s_at	2.49273	5.56417
13236	Cfa.3780.1.S1_at	2.46353	10.6712
10735	Cfa.2080.1.S1_at	2.45908	6.33893
5844	Cfa.15172.1.A1_at	2.45649	5.64778
34238	CfaAffx.27421.1.S1_at	2.45149	5.33578
16078	Cfa.6460.1.A1_at	2.44429	6.61429
10489	Cfa.20456.1.S1_s_at	2.43118	3.58954
26591	CfaAffx.18010.1.S1_s_at	2.42721	5.44335
17316	Cfa.7527.1.A1_at	2.41113	3.23455
13138	Cfa.3707.2.S1_at	2.40382	7.37945
25103	CfaAffx.16198.1.S1_s_at	2.38022	5.72247
31718	CfaAffx.24362.1.S1_at	2.3764	5.76963
12743	Cfa.334.1.A1_s_at	2.36079	3.23381
2517	Cfa.12168.1.A1_s_at	2.33507	8.53999
2596	Cfa.12226.1.A1_at	2.32854	11.8265
7682	Cfa.174.1.S1_s_at	2.31192	4.52534
8040	Cfa.17835.1.S1_s_at	2.29636	5.31429
6841	Cfa.16308.1.S1_s_at	2.28368	6.17534
34577	CfaAffx.27859.1.S1_at	2.26834	4.72812
21200	CfaAffx.11437.1.S1_s_at	2.24256	5.66317
2510	Cfa.12161.1.A1_at	2.233	6.63704
9217	Cfa.1912.1.S1_at	2.22174	4.15662
24150	CfaAffx.15026.1.S1_s_at	2.21861	4.82617
20806	CfaAffx.10947.1.S1_s_at	2.21099	12.0086
13687	Cfa.432.2.A1_at	2.18403	4.76338
22067	CfaAffx.12503.1.S1_s_at	2.14419	9.48727
18507	Cfa.8530.1.A1_s_at	2.12827	3.84467
35394	CfaAffx.28872.1.S1_at	2.12063	5.63241
8932	Cfa.1879.1.S1_s_at	2.11404	4.5376
42874	CfaAffx.9874.1.S1_s_at	2.10111	5.24302
12893	Cfa.3497.1.A1_s_at	2.09861	7.12654
24289	CfaAffx.15203.1.S1_s_at	2.09564	5.1654
8901	Cfa.18759.1.S1_s_at	2.08642	4.39538
1410	Cfa.11202.1.S1_at	2.03229	3.30351
35177	CfaAffx.28584.1.S1_at	2.03118	5.03948
11238	Cfa.21325.1.S1_s_at	2.0311	5.99506
25309	CfaAffx.16441.1.S1_s_at	2.02349	4.96876
223	Cfa.10120.1.S1_at	1.98113	3.88368
25402	CfaAffx.16568.1.S1_s_at	1.96539	6.63902
6840	Cfa.16308.1.S1_a_at	1.94986	6.26366
21507	CfaAffx.11840.1.S1_at	1.94044	9.59713
29242	CfaAffx.21225.1.S1_s_at	1.93391	2.87634
10488	Cfa.20456.1.S1_at	1.93133	3.34054
35061	CfaAffx.28439.1.S1_at	1.91818	6.62392
23529	CfaAffx.14256.1.S1_s_at	1.91439	6.36516
1250	Cfa.11049.1.A1_at	1.87077	3.02763
5685	Cfa.15035.1.A1_at	1.86728	5.93596
19971	Cfa.9940.1.S1_at	1.86625	7.55971
29503	CfaAffx.21576.1.S1_at	1.84874	4.36359
7615	Cfa.17318.1.S1_s_at	1.84217	9.92538
14260	Cfa.4825.1.A1_at	1.83945	7.11418
1380	Cfa.11171.1.A1_at	1.83774	6.41707
22808	CfaAffx.13342.1.S1_at	1.83646	5.98681
18628	Cfa.8622.1.A1_s_at	1.82714	3.71779
9824	Cfa.19766.1.A1_at	1.82372	5.20334
367	Cfa.10265.1.S1_at	1.81732	4.06895
22597	CfaAffx.13109.1.S1_s_at	1.81156	4.80921
10913	Cfa.20978.1.S1_s_at	1.80803	5.93458
6961	Cfa.16431.1.A1_at	1.79918	6.3204
4465	Cfa.13909.1.A1_s_at	1.79724	4.00767
17447	Cfa.764.1.S1_at	1.78539	6.30939
5975	Cfa.15285.2.A1_a_at	1.78134	7.08003
25272	CfaAffx.16396.1.S1_at	1.7796	6.92426
1639	Cfa.11405.1.A1_at	1.76943	5.44377
29969	CfaAffx.22128.1.S1_at	1.73868	11.8765
36011	CfaAffx.29633.1.S1_s_at	1.73418	6.18909
17859	Cfa.8.1.S1_s_at	1.72248	5.0425
27314	CfaAffx.18897.1.S1_s_at	1.72081	3.23695
6396	Cfa.15678.1.A1_at	1.71967	5.74378
28064	CfaAffx.19822.1.S1_at	1.7186	8.45874
2973	Cfa.1254.1.S1_s_at	1.71688	10.0756
26746	CfaAffx.182.1.S1_at	1.70819	5.15647
10689	Cfa.20750.1.S1_at	1.70312	4.68034
22580	CfaAffx.1309.1.S1_at	1.70116	6.24032
42319	CfaAffx.9180.1.S1_s_at	1.69743	5.81582
8579	Cfa.18423.1.S1_at	1.69622	4.63945
11778	Cfa.2423.1.A1_at	1.68555	4.28354
31539	CfaAffx.24141.1.S1_at	1.67533	7.13953
2483	Cfa.1213.1.S1_s_at	1.6752	4.99609
7367	Cfa.17006.1.S1_at	1.67367	5.31996
16091	Cfa.6474.1.A1_at	1.67341	3.83021
27753	CfaAffx.19424.1.S1_at	1.67276	5.20377
26909	CfaAffx.18405.1.S1_s_at	1.64795	6.40509
6893	Cfa.1636.1.A1_s_at	1.64608	4.87215
21293	CfaAffx.11565.1.S1_s_at	1.62812	5.01117
8509	Cfa.1835.1.S1_at	1.61636	5.98574
1402	Cfa.11192.1.A1_at	1.61613	3.85418
8625	Cfa.18473.1.S1_s_at	1.60829	6.28431
973	Cfa.10796.1.S1_at	1.60639	7.66038
21824	CfaAffx.12212.1.S1_at	1.60479	3.95346
21733	CfaAffx.12100.1.S1_at	1.59902	4.17983
32230	CfaAffx.24979.1.S1_at	1.59386	4.47496
42106	CfaAffx.8916.1.S1_at	1.58942	4.02332
3386	Cfa.12898.1.A1_at	1.58064	5.54103
10613	Cfa.20664.1.S1_s_at	1.5732	4.111
28065	CfaAffx.19822.1.S1_s_at	1.57294	7.89224
19614	Cfa.9558.1.A1_at	1.57068	6.63282
2891	Cfa.12467.2.A1_a_at	1.56448	6.93107
22596	CfaAffx.13109.1.S1_at	1.56007	4.78173
14067	Cfa.4660.1.A1_at	1.55608	5.45178
9927	Cfa.19866.1.S1_at	1.54815	8.40288
23039	CfaAffx.13625.1.S1_at	1.54796	6.02028
3268	Cfa.12793.1.A1_at	1.52804	7.97839
24143	CfaAffx.15017.1.S1_at	1.52378	3.61052
30928	CfaAffx.23343.1.S1_s_at	1.5184	10.0727
25627	CfaAffx.16843.1.S1_s_at	1.51241	6.57603
29886	CfaAffx.22033.1.S1_s_at	1.5085	6.52573
11040	Cfa.21109.1.S1_s_at	1.48757	5.20796
2626	Cfa.1225.1.S1_at	1.48634	8.255
12997	Cfa.3589.1.S1_s_at	1.48264	6.40916
39584	CfaAffx.5863.1.S1_at	1.48231	4.27276
6281	Cfa.15576.1.A1_at	1.4815	4.26957
10952	Cfa.2101.1.A1_at	1.47936	5.95234
34520	CfaAffx.27780.1.S1_at	1.47867	3.95303
25800	CfaAffx.17030.1.S1_s_at	1.47638	5.67497
21975	CfaAffx.1239.1.S1_s_at	1.47508	6.08778
6901	Cfa.16368.1.S1_at	1.47387	4.34802
23806	CfaAffx.14622.1.S1_at	1.47024	6.64541
38593	CfaAffx.4561.1.S1_s_at	1.4692	3.75358
15595	Cfa.6022.1.A1_at	1.46548	5.48251
4764	Cfa.14184.1.A1_at	1.46304	6.36338
14859	Cfa.5356.1.A1_at	1.46285	4.23583
36071	CfaAffx.297.1.S1_at	1.45613	5.55509
42714	CfaAffx.9657.1.S1_s_at	1.4539	4.60547
31299	CfaAffx.23845.1.S1_s_at	1.45348	4.29155
32749	CfaAffx.25584.1.S1_at	1.45059	5.49114
38437	CfaAffx.4359.1.S1_s_at	1.4497	4.99534
1952	Cfa.11686.1.A1_at	1.44881	5.79716
10570	Cfa.20597.1.S1_s_at	1.44312	5.65232
5254	Cfa.14639.1.S1_at	1.43836	3.60716
195	Cfa.10092.1.A1_at	1.43456	5.81506
12485	Cfa.3073.1.A1_at	1.43388	4.87451
40537	CfaAffx.7006.1.S1_s_at	1.42465	4.73494
26326	CfaAffx.17673.1.S1_at	1.42174	4.68026
34607	CfaAffx.27890.1.S1_s_at	1.42012	4.66887
23527	CfaAffx.14252.1.S1_s_at	1.41955	4.92931
15239	Cfa.5696.1.A1_at	1.41903	3.92792
34886	CfaAffx.2820.1.S1_s_at	1.4131	8.04089
8164	Cfa.17966.1.S1_s_at	1.41168	4.55976
32820	CfaAffx.25674.1.S1_s_at	1.40818	3.22102
21246	CfaAffx.11492.1.S1_s_at	1.39922	5.53558
39000	CfaAffx.5089.1.S1_at	1.39365	4.81712
13119	Cfa.3691.1.S1_s_at	1.39136	4.73422
28409	CfaAffx.20229.1.S1_at	1.3855	3.95629
12316	Cfa.2913.1.A1_at	1.38431	6.37402
12852	Cfa.346.1.A1_at	1.37919	3.79657
33839	CfaAffx.26925.1.S1_s_at	1.37838	4.15417
34732	CfaAffx.28029.1.S1_at	1.3662	3.62718
2976	Cfa.12541.1.A1_at	1.36616	3.12482
1359	Cfa.11154.1.A1_at	1.36401	4.02246
4968	Cfa.14372.1.S1_at	1.36007	5.54471
31268	CfaAffx.2381.1.S1_at	1.35382	5.9018
31550	CfaAffx.24158.1.S1_s_at	1.35132	5.08585
35589	CfaAffx.29117.1.S1_s_at	1.3433	3.39034
21303	CfaAffx.11580.1.S1_at	1.33741	6.42829
1039	Cfa.10853.1.A1_at	1.33543	7.43916
13482	Cfa.400.1.A1_at	1.335	4.14388
11003	Cfa.21056.1.S1_at	1.33397	7.24771
26083	CfaAffx.17386.1.S1_s_at	1.33261	6.13862
36857	CfaAffx.30695.1.S1_s_at	1.3312	5.39991
34889	CfaAffx.28205.1.S1_at	1.32954	6.287
40282	CfaAffx.6720.1.S1_at	1.32639	3.78741
22813	CfaAffx.13349.1.S1_at	1.32371	5.04069
6889	Cfa.16355.1.S1_s_at	1.31988	6.6988
12436	Cfa.303.1.A1_at	1.31899	5.52293
2310	Cfa.11990.1.A1_at	1.31717	4.5947
8523	Cfa.18363.1.S1_s_at	1.31716	7.25034
13433	Cfa.3951.1.A1_at	1.31523	3.84841
1524	Cfa.11304.1.A1_at	1.31325	6.99656
2047	Cfa.11769.1.A1_at	1.3108	5.46582
6888	Cfa.16355.1.S1_at	1.30552	8.67698
20322	CfaAffx.10344.1.S1_at	1.30372	4.98692
39015	CfaAffx.5105.1.S1_at	1.29863	3.5822
29502	CfaAffx.21575.1.S1_s_at	1.2952	7.14173
3298	Cfa.12820.2.A1_a_at	1.29176	5.73733
23523	CfaAffx.14248.1.S1_s_at	1.29079	3.15267
34015	CfaAffx.27143.1.S1_s_at	1.28864	3.49845
7686	Cfa.17403.1.S1_at	1.2863	4.21111
7356	Cfa.16996.1.S1_at	1.28567	6.8554
7862	Cfa.17650.1.S1_s_at	1.28566	5.47838
42467	CfaAffx.9355.1.S1_at	1.28528	4.42878
25137	CfaAffx.1623.1.S1_s_at	1.28453	4.41778
41863	CfaAffx.8631.1.S1_s_at	1.28437	5.48494
31362	CfaAffx.23927.1.S1_at	1.28348	3.91115
4431	Cfa.13873.2.A1_s_at	1.27882	5.72508
20076	CfaAffx.10063.1.S1_at	1.27751	6.77161
5989	Cfa.15300.1.A1_at	1.27343	6.8433
34018	CfaAffx.27149.1.S1_at	1.27121	3.90361
25162	CfaAffx.16257.1.S1_s_at	1.27119	4.09355
13273	Cfa.381.1.A1_at	1.27074	4.99739
18627	Cfa.8621.1.A1_s_at	1.26848	4.51869
5024	Cfa.14425.1.S1_at	1.26813	4.90258
972	Cfa.10795.1.A1_s_at	1.26715	4.69433
17284	Cfa.7499.1.S1_at	1.2658	6.20246
10872	Cfa.20936.1.S1_s_at	1.26323	6.01703
8639	Cfa.18489.1.S1_at	1.2595	3.87272
2983	Cfa.12547.1.A1_at	1.25916	6.89706
28531	CfaAffx.20375.1.S1_s_at	1.25784	5.30263
2947	Cfa.12514.1.A1_at	1.25541	8.01874
6902	Cfa.1637.1.S1_s_at	1.25326	3.29894
5483	Cfa.14859.1.A1_at	1.25299	7.64599
28909	CfaAffx.2081.1.S1_s_at	1.25187	3.75501
4352	Cfa.13799.1.A1_at	1.25172	4.16964
36686	CfaAffx.30490.1.S1_at	1.25117	4.98641
40097	CfaAffx.6497.1.S1_at	1.2503	4.8148
6382	Cfa.15666.1.A1_at	1.24983	3.88573
12841	Cfa.3449.1.S1_s_at	1.24722	4.39075
21412	CfaAffx.11721.1.S1_s_at	1.24654	5.83339
12792	Cfa.3398.1.A1_s_at	1.24506	8.60802
34242	CfaAffx.27426.1.S1_at	1.24261	3.84029
31071	CfaAffx.23551.1.S1_at	1.2415	4.87049
41867	CfaAffx.8635.1.S1_at	1.24147	3.20205
33672	CfaAffx.26711.1.S1_s_at	1.24037	4.92247
28442	CfaAffx.20278.1.S1_at	1.2403	4.57687
6201	Cfa.15501.1.A1_at	1.23658	5.02908
30332	CfaAffx.22581.1.S1_at	1.23383	7.22404
31251	CfaAffx.2379.1.S1_at	1.23316	4.4622
37637	CfaAffx.3387.1.S1_at	1.23232	3.47991
39452	CfaAffx.5694.1.S1_at	1.23044	6.826
11129	Cfa.21191.1.S1_at	1.22876	8.60245
34627	CfaAffx.27913.1.S1_at	1.22786	2.97601
24234	CfaAffx.15143.1.S1_at	1.22541	7.54157
7320	Cfa.16941.1.S1_at	1.22219	5.54048
5857	Cfa.15181.1.A1_s_at	1.22097	6.77763
20214	CfaAffx.10229.1.S1_at	1.21815	9.23376
36122	CfaAffx.29762.1.S1_at	1.21783	6.95448
23450	CfaAffx.14165.1.S1_s_at	1.21608	4.96417
20811	CfaAffx.10951.1.S1_at	1.21532	4.07596
18952	Cfa.89.1.S1_at	1.21378	3.19293
25996	CfaAffx.17282.1.S1_at	1.21376	3.35103
23926	CfaAffx.14777.1.S1_s_at	1.21314	4.42587
18208	Cfa.8292.1.A1_at	1.2131	4.02864
6127	Cfa.15432.1.A1_s_at	1.21304	3.25099
18304	Cfa.837.1.S1_at	1.20996	4.41481
24252	CfaAffx.15163.1.S1_at	1.20923	4.74475
7315	Cfa.16935.1.S1_at	1.20522	5.3638
2773	Cfa.12378.1.A1_at	1.20517	7.29372
22155	CfaAffx.12608.1.S1_at	1.20496	4.48223
13108	Cfa.3680.1.S1_s_at	1.2037	4.96187
38373	CfaAffx.4282.1.S1_at	1.20292	4.37549
11128	Cfa.21191.1.S1_a_at	1.20272	9.21768
2692	Cfa.12306.1.A1_at	1.20169	7.52858
5312	Cfa.14695.1.A1_s_at	1.1999	5.39859
22059	CfaAffx.12492.1.S1_at	1.19939	4.16703
41945	CfaAffx.8734.1.S1_s_at	1.19711	5.07981
38295	CfaAffx.4188.1.S1_s_at	1.19654	6.52148
12766	Cfa.337.1.A1_at	1.19651	3.14952
16704	Cfa.6993.1.A1_s_at	1.19419	5.83985
15385	Cfa.5832.1.A1_a_at	1.19111	4.02596
21423	CfaAffx.11731.1.S1_at	1.19089	5.92188
27353	CfaAffx.18949.1.S1_at	1.18932	5.05114
11479	Cfa.21634.1.S1_at	1.18823	6.36601
41986	CfaAffx.8781.1.S1_s_at	1.18791	6.4955
36908	CfaAffx.30767.1.S1_at	1.18728	6.48506
29003	CfaAffx.2093.1.S1_at	1.18698	4.69582
641	Cfa.10510.1.A1_at	1.18615	4.3157
20692	CfaAffx.10818.1.S1_s_at	1.18531	6.67129
16974	Cfa.7227.1.A1_s_at	1.18515	6.1362
34972	CfaAffx.28315.1.S1_s_at	1.18467	6.21171
21922	CfaAffx.12324.1.S1_at	1.18389	6.00212
25710	CfaAffx.16935.1.S1_at	1.18221	6.98672
15016	Cfa.5493.1.A1_at	1.18036	6.2534
36827	CfaAffx.30663.1.S1_at	1.1799	5.58555
34992	CfaAffx.28332.1.S1_s_at	1.17543	3.96088
42595	CfaAffx.9528.1.S1_s_at	1.17535	4.87029
27308	CfaAffx.18890.1.S1_at	1.17353	3.25981
29839	CfaAffx.21982.1.S1_at	1.17338	4.49137
5882	Cfa.15200.1.S1_at	1.17213	3.23752
30043	CfaAffx.22235.1.S1_at	1.17207	6.32404
5511	Cfa.14889.1.A1_at	1.17084	5.91835
18095	Cfa.8193.1.S1_at	1.16981	5.2614
4125	Cfa.13592.1.A1_at	1.1674	4.82949
39175	CfaAffx.5340.1.S1_at	1.16637	5.20182
18469	Cfa.85.1.S1_s_at	1.16525	6.47488
22911	CfaAffx.13467.1.S1_at	1.1652	2.95795
33082	CfaAffx.25997.1.S1_s_at	1.16488	6.53273
39534	CfaAffx.5799.1.S1_s_at	1.16222	5.58484
23338	CfaAffx.14010.1.S1_s_at	1.16126	7.44888
41847	CfaAffx.8612.1.S1_s_at	1.16018	3.87067
13641	Cfa.4261.1.A1_at	1.15969	9.84344
608	Cfa.10486.1.A1_at	1.15782	6.66393
8568	Cfa.18413.1.S1_at	1.15571	5.44946
18089	Cfa.8187.1.A1_at	1.15475	5.07801
38413	CfaAffx.4331.1.S1_at	1.15458	4.25224
17777	Cfa.7927.1.A1_at	1.15384	4.69789
11960	Cfa.2590.1.A1_a_at	1.1537	7.12755
30869	CfaAffx.23279.1.S1_s_at	1.15296	6.86481
16481	Cfa.681.1.A1_at	1.15227	5.06603
7696	Cfa.17412.1.S1_s_at	1.14981	5.40029
40732	CfaAffx.7242.1.S1_at	1.14903	3.26732
8516	Cfa.18356.1.S1_s_at	1.14898	4.6648
14741	Cfa.5258.1.A1_at	1.14864	7.77217
16703	Cfa.6991.1.A1_at	1.14808	8.62683
30258	CfaAffx.22478.1.S1_s_at	1.14792	4.57034
8146	Cfa.17944.1.S1_s_at	1.14717	7.4877
9423	Cfa.19384.1.S1_at	1.14691	5.9036
13933	Cfa.4549.1.A1_at	1.14575	7.1699
7619	Cfa.17323.1.S1_s_at	1.1456	5.92653
6078	Cfa.15390.1.A1_at	1.14531	6.00519
24287	CfaAffx.15201.1.S1_at	1.14504	4.31131
9800	Cfa.19743.1.S1_s_at	1.14421	5.34958
4446	Cfa.1389.1.A1_at	1.14408	10.0609
2118	Cfa.11831.1.A1_at	1.14208	6.53652
15846	Cfa.6255.1.S1_s_at	1.14171	6.46834
35828	CfaAffx.29389.1.S1_s_at	1.13958	5.51853
19597	Cfa.9541.1.A1_at	1.13811	6.26905
15145	Cfa.5605.1.A1_at	1.13752	5.04525
31349	CfaAffx.23913.1.S1_s_at	1.13749	6.78811
32806	CfaAffx.25660.1.S1_at	1.1367	3.67076
23326	CfaAffx.140.1.S1_at	1.13606	6.72787
37225	CfaAffx.31160.1.S1_at	1.13594	4.68189
33760	CfaAffx.26833.1.S1_s_at	1.13544	5.48633
31374	CfaAffx.23941.1.S1_s_at	1.13479	6.05101
6930	Cfa.16391.2.A1_x_at	1.1327	8.13338
990	Cfa.10810.2.S1_s_at	1.1325	9.45302
37695	CfaAffx.3459.1.S1_at	1.1304	6.6127
7843	Cfa.17628.1.S1_at	1.13029	3.35932
34900	CfaAffx.28220.1.S1_at	1.12986	3.8699
19749	Cfa.9700.1.A1_at	1.12963	5.08018
4962	Cfa.1437.1.S1_at	1.12854	6.95827
4973	Cfa.14378.1.S1_at	1.12794	3.4007
37242	CfaAffx.31178.1.S1_at	1.12707	3.25158
28862	CfaAffx.20767.1.S1_at	1.12701	4.04695
20372	CfaAffx.1041.1.S1_at	1.12667	7.001
1085	Cfa.10891.1.A1_at	1.12626	4.46174
36803	CfaAffx.30637.1.S1_at	1.12569	7.02324
37970	CfaAffx.3800.1.S1_s_at	1.12553	3.96866
40834	CfaAffx.738.1.S1_x_at	1.12437	7.01467
32907	CfaAffx.25771.1.S1_at	1.12419	6.42906
22156	CfaAffx.12608.1.S1_s_at	1.12418	4.0857
9993	Cfa.19941.1.S1_s_at	1.1235	5.57754
25950	CfaAffx.17229.1.S1_x_at	1.12143	7.12351
41218	CfaAffx.7869.1.S1_s_at	1.1204	3.64736
35102	CfaAffx.28496.1.S1_at	1.11911	3.85239
24253	CfaAffx.15164.1.S1_s_at	1.11758	6.34353
14197	Cfa.4771.2.A1_a_at	1.11711	5.33438
14732	Cfa.525.1.S1_at	1.11463	9.97498
21251	CfaAffx.11498.1.S1_at	1.11392	3.98602
35194	CfaAffx.28601.1.S1_s_at	1.1133	5.945
27078	CfaAffx.18613.1.S1_s_at	1.11232	9.25294
1233	Cfa.11031.1.A1_at	1.11168	3.64219
23396	CfaAffx.14097.1.S1_s_at	1.11043	8.30784
7996	Cfa.1780.1.S1_at	1.10859	7.44278
35211	CfaAffx.2863.1.S1_at	1.10831	4.52545
8961	Cfa.1882.1.A1_at	1.10669	5.01109
34449	CfaAffx.27691.1.S1_s_at	1.10551	6.66786
27740	CfaAffx.19408.1.S1_s_at	1.10473	3.36893
31987	CfaAffx.24713.1.S1_at	1.10454	7.35089
11123	Cfa.21183.1.S1_s_at	1.10396	7.27854
6420	Cfa.15697.1.A1_at	1.10217	5.6515
23184	CfaAffx.13822.1.S1_s_at	1.10206	8.48715
21734	CfaAffx.12101.1.S1_s_at	1.10125	4.16416
33589	CfaAffx.26608.1.S1_at	1.09998	4.88649
21339	CfaAffx.11622.1.S1_at	1.09724	5.80381
11130	Cfa.21191.2.S1_a_at	1.09679	8.83147
13548	Cfa.4103.1.A1_at	1.09524	8.40216
38743	CfaAffx.4735.1.S1_s_at	1.0948	8.72547
5558	Cfa.14924.1.A1_x_at	1.09351	6.37493
20470	CfaAffx.1052.1.S1_s_at	1.09295	4.02159
32025	CfaAffx.24768.1.S1_s_at	1.09233	6.2302
3659	Cfa.13157.1.A1_at	1.09192	4.6882
36628	CfaAffx.30423.1.S1_at	1.09104	4.50865
39764	CfaAffx.6090.1.S1_at	1.09038	4.5994
10937	Cfa.21.1.S1_s_at	1.08956	2.65534
6683	Cfa.16089.1.S1_at	1.08775	6.04946
9622	Cfa.19571.1.S1_s_at	1.08734	6.51852
24511	CfaAffx.15464.1.S1_s_at	1.08707	5.25212
19490	Cfa.9436.1.A1_at	1.08683	6.4839
23411	CfaAffx.14116.1.S1_at	1.08673	5.20183
33750	CfaAffx.26814.1.S1_at	1.08577	5.86272
28620	CfaAffx.20477.1.S1_s_at	1.08181	5.19316
27339	CfaAffx.18931.1.S1_at	1.08124	4.93328
10944	Cfa.21005.1.S1_at	1.08106	5.76538
23266	CfaAffx.13932.1.S1_at	1.08069	5.03238
26985	CfaAffx.18494.1.S1_at	1.08061	5.09258
32546	CfaAffx.25349.1.S1_s_at	1.07859	5.9778
8655	Cfa.18508.1.S1_s_at	1.07775	7.63284
37783	CfaAffx.3571.1.S1_s_at	1.07739	7.41314
10112	Cfa.20050.1.S1_s_at	1.07721	5.82377
37535	CfaAffx.3267.1.S1_s_at	1.07642	9.57962
21996	CfaAffx.12419.1.S1_s_at	1.07637	9.68446
25467	CfaAffx.16654.1.S1_s_at	1.07634	3.67752
24923	CfaAffx.15972.1.S1_at	1.07367	4.22691
16577	Cfa.689.1.A1_at	1.0732	7.45084
25105	CfaAffx.1620.1.S1_at	1.07224	5.54708
26780	CfaAffx.18249.1.S1_s_at	1.0712	4.32303
36807	CfaAffx.30640.1.S1_s_at	1.07066	4.07222
4745	Cfa.14166.2.A1_a_at	1.0703	9.3716
4369	Cfa.13816.1.A1_at	1.06976	4.32283
31657	CfaAffx.24286.1.S1_at	1.06817	3.96761
34445	CfaAffx.27689.1.S1_s_at	1.06751	5.01405
26892	CfaAffx.18382.1.S1_s_at	1.06727	4.62636
20802	CfaAffx.10943.1.S1_at	1.06699	4.24187
25365	CfaAffx.16513.1.S1_s_at	1.0667	4.45338
12378	Cfa.2974.1.S1_at	1.06513	4.42578
25329	CfaAffx.16463.1.S1_at	1.06394	2.50738
7685	Cfa.17400.1.S1_s_at	1.06351	3.81664
35257	CfaAffx.28690.1.S1_at	1.0625	4.15774
6929	Cfa.16391.2.A1_at	1.06223	8.63301
19295	Cfa.9248.1.A1_at	1.06197	4.41449
25711	CfaAffx.16936.1.S1_s_at	1.06158	10.4867
34843	CfaAffx.28155.1.S1_at	1.06038	5.76595
25411	CfaAffx.16579.1.S1_at	1.06028	6.8758
28933	CfaAffx.20839.1.S1_at	1.06006	3.5487
33697	CfaAffx.26740.1.S1_s_at	1.05866	3.62829
16816	Cfa.7090.1.S1_s_at	1.05827	6.31206
7928	Cfa.17731.1.S1_s_at	1.05786	5.53281
9634	Cfa.19584.1.A1_at	1.05628	4.22381
26479	CfaAffx.17868.1.S1_s_at	1.05543	10.9968
10806	Cfa.20876.1.S1_s_at	1.05467	7.92179
23544	CfaAffx.14279.1.S1_s_at	1.05393	3.85629
11981	Cfa.2610.1.A1_at	1.05369	4.50329
20417	CfaAffx.10457.1.S1_at	1.05316	3.24657
15524	Cfa.5954.1.A1_at	1.05242	6.87631
5538	Cfa.14905.2.A1_a_at	1.05226	3.53492
32663	CfaAffx.25482.1.S1_at	1.05217	4.05744
31896	CfaAffx.24595.1.S1_s_at	1.05212	8.43192
6785	Cfa.16245.1.S1_at	1.05163	3.45146
29298	CfaAffx.21308.1.S1_s_at	1.0514	6.87305
41131	CfaAffx.7759.1.S1_at	1.0511	2.81247
11317	Cfa.21450.1.S1_s_at	1.0497	9.66597
9032	Cfa.18905.1.S1_s_at	1.04918	4.02965
12947	Cfa.3546.2.S1_s_at	1.04887	7.06476
490	Cfa.10376.1.A1_at	1.04772	8.0629
37638	CfaAffx.3387.1.S1_s_at	1.04766	2.88321
37495	CfaAffx.3217.1.S1_s_at	1.04711	3.59676
14928	Cfa.5413.1.A1_at	1.04667	9.5207
1712	Cfa.11469.1.A1_s_at	1.04638	6.43161
35259	CfaAffx.28692.1.S1_s_at	1.04534	5.45947
32407	CfaAffx.25184.1.S1_s_at	1.04464	4.3877
30091	CfaAffx.22285.1.S1_s_at	1.04449	6.68358
12328	Cfa.2927.1.S1_at	1.04356	9.47197
26154	CfaAffx.17462.1.S1_at	1.04312	3.67074
37990	CfaAffx.3825.1.S1_at	1.04278	6.76811
19211	Cfa.9161.1.S1_at	1.04175	5.42998
9342	Cfa.19239.1.S1_s_at	1.04162	8.46573
29406	CfaAffx.21443.1.S1_at	1.04103	4.09307
32576	CfaAffx.25383.1.S1_at	1.0405	4.88862
5922	Cfa.15236.2.S1_s_at	1.03973	5.15305
24009	CfaAffx.14862.1.S1_at	1.03948	4.46063
9263	Cfa.19154.2.S1_at	1.03712	3.18014
5891	Cfa.1521.1.S1_at	1.03707	8.23908
23244	CfaAffx.13903.1.S1_a_at	1.03592	5.43577
19173	Cfa.9124.1.A1_at	1.03489	4.375
30628	CfaAffx.2298.1.S1_at	1.03397	3.26708
22722	CfaAffx.1324.1.S1_at	1.03295	7.98488
39738	CfaAffx.6059.1.S1_at	1.03161	10.0436
37147	CfaAffx.31057.1.S1_at	1.03026	6.39003
19268	Cfa.9220.1.S1_a_at	1.02999	5.04932
30335	CfaAffx.22584.1.S1_s_at	1.02982	7.64254
42493	CfaAffx.9387.1.S1_at	1.02948	3.90454
24060	CfaAffx.14924.1.S1_at	1.0292	5.92548
12688	Cfa.3282.1.S1_s_at	1.02917	4.16182
20586	CfaAffx.10677.1.S1_at	1.02888	4.77879
5230	Cfa.14621.1.S1_a_at	1.02833	3.04867
11089	Cfa.21153.2.S1_s_at	1.02744	5.22394
23585	CfaAffx.14331.1.S1_at	1.02589	4.22744
8530	Cfa.18369.1.S1_s_at	1.02539	4.13664
6058	Cfa.15371.1.A1_at	1.0248	3.83306
5954	Cfa.15263.2.A1_at	1.02437	3.95201
23520	CfaAffx.14246.1.S1_at	1.02357	7.92096
19630	Cfa.9576.1.S1_at	1.02347	5.88838
35990	CfaAffx.29601.1.S1_at	1.02308	3.66832
21709	CfaAffx.12066.1.S1_at	1.02201	6.35007
13535	Cfa.4092.1.S1_at	1.02197	3.85348
34175	CfaAffx.27348.1.S1_at	1.02178	3.29761
15208	Cfa.5668.1.A1_at	1.02097	3.53
40850	CfaAffx.7398.1.S1_at	1.02086	11.2579
9464	Cfa.19426.1.S1_at	1.02082	7.27394
20508	CfaAffx.10568.1.S1_s_at	1.02081	5.21999
7533	Cfa.17220.1.S1_s_at	1.01989	7.58823
20998	CfaAffx.11161.1.S1_s_at	1.01965	4.99317
33758	CfaAffx.26828.1.S1_at	1.01942	8.67316
25183	CfaAffx.1628.1.S1_s_at	1.0192	9.97159
9278	Cfa.19165.1.S1_s_at	1.01789	5.96332
21375	CfaAffx.1167.1.S1_s_at	1.01788	6.88268
794	Cfa.10634.1.A1_at	1.01668	6.34021
20046	CfaAffx.10024.1.S1_s_at	1.01506	11.6551
9446	Cfa.19408.1.S1_at	1.0144	3.17097
37215	CfaAffx.31152.1.S1_at	1.01427	5.32542
8674	Cfa.18525.1.S1_at	1.01361	7.39538
35763	CfaAffx.29312.1.S1_at	1.01346	8.09242
22741	CfaAffx.13263.1.S1_at	1.01342	6.841
42200	CfaAffx.9027.1.S1_at	1.01174	4.16205
38041	CfaAffx.3895.1.S1_at	1.01149	5.81729
7802	Cfa.17586.1.S1_s_at	1.01139	4.85107
14729	Cfa.5247.1.A1_at	1.01137	8.47839
33919	CfaAffx.27026.1.S1_s_at	1.01056	6.6305
30668	CfaAffx.23020.1.S1_at	1.01011	5.82674
19104	Cfa.9056.1.A1_at	1.0096	3.50408
9802	Cfa.19744.1.S1_at	1.00949	3.28198
34217	CfaAffx.27391.1.S1_s_at	1.00755	5.90959
33098	CfaAffx.26017.1.S1_at	1.00647	4.91934
39700	CfaAffx.6000.1.S1_at	1.00641	3.60575
11155	Cfa.21226.1.S1_s_at	1.00588	4.27434
31413	CfaAffx.23984.1.S1_at	1.00548	5.06755
23888	CfaAffx.14735.1.S1_at	1.00417	6.47518
39481	CfaAffx.5724.1.S1_at	1.00348	4.15581
40622	CfaAffx.7108.1.S1_at	1.0026	8.75501
33978	CfaAffx.27099.1.S1_at	1.00207	4.39321
5376	Cfa.1476.1.A1_at	1.00202	8.03261
36279	CfaAffx.29948.1.S1_at	0.998179	6.30278
32496	CfaAffx.25289.1.S1_s_at	0.997113	5.83357
42615	CfaAffx.9546.1.S1_at	0.996676	7.05011
22905	CfaAffx.13459.1.S1_s_at	0.996548	3.88102
30469	CfaAffx.22757.1.S1_s_at	0.995891	7.43067
26206	CfaAffx.17526.1.S1_at	0.995429	4.4359
36674	CfaAffx.30470.1.S1_s_at	0.995141	3.52318
42794	CfaAffx.9762.1.S1_s_at	0.995017	6.31177
26478	CfaAffx.17868.1.S1_at	0.992989	9.87127
11193	Cfa.21283.1.S1_at	0.992901	7.54414
25302	CfaAffx.16434.1.S1_s_at	0.992833	8.47157
30872	CfaAffx.23284.1.S1_s_at	0.992629	3.18849
20916	CfaAffx.11072.1.S1_s_at	0.992468	3.08458
38570	CfaAffx.4532.1.S1_s_at	0.992269	12.6321
35229	CfaAffx.28656.1.S1_s_at	0.990975	4.49243
25645	CfaAffx.16862.1.S1_at	0.989812	4.42973
42576	CfaAffx.9503.1.S1_at	0.989542	7.65032
31261	CfaAffx.23800.1.S1_s_at	0.988741	3.82202
11645	Cfa.231.1.A1_at	0.988165	7.92189
26162	CfaAffx.1747.1.S1_at	0.987264	7.35393
35433	CfaAffx.28932.1.S1_s_at	0.987216	2.97156
42379	CfaAffx.9253.1.S1_s_at	0.985513	7.41899
32685	CfaAffx.25509.1.S1_s_at	0.984325	5.76792
22667	CfaAffx.13183.1.S1_s_at	0.984262	3.73908
15283	Cfa.5737.1.A1_s_at	0.984147	3.95888
26411	CfaAffx.17779.1.S1_s_at	0.98408	4.51174
24784	CfaAffx.1580.1.S1_s_at	0.983527	9.03036
15952	Cfa.635.1.A1_s_at	0.983148	8.86187
11766	Cfa.2411.1.A1_at	0.983145	4.06304
42740	CfaAffx.9696.1.S1_at	0.981306	7.25652
27067	CfaAffx.18598.1.S1_s_at	0.981237	7.92008
37546	CfaAffx.3278.1.S1_at	0.980531	5.08392
30297	CfaAffx.22532.1.S1_s_at	0.979299	3.60537
23214	CfaAffx.1386.1.S1_at	0.978601	3.4565
37254	CfaAffx.31189.1.S1_at	0.977455	3.23029
5626	Cfa.14987.1.A1_at	0.977292	6.62105
17319	Cfa.753.1.S1_at	0.97675	8.61015
32075	CfaAffx.24822.1.S1_s_at	0.976597	4.90222
16104	Cfa.6487.1.A1_s_at	0.976388	5.87429
19091	Cfa.9044.1.A1_at	0.97592	6.99013
5492	Cfa.1487.1.A1_at	0.975529	4.29847
13968	Cfa.4579.1.S1_s_at	0.975308	6.75882
4159	Cfa.13621.1.A1_at	0.975227	4.62261
40833	CfaAffx.738.1.S1_s_at	0.975205	7.54681
18106	Cfa.8203.1.A1_at	0.974547	7.70234
1576	Cfa.11351.1.A1_s_at	0.974269	6.1258
40716	CfaAffx.7221.1.S1_s_at	0.973878	9.35311
35550	CfaAffx.29071.1.S1_at	0.972204	7.10146
34669	CfaAffx.27957.1.S1_at	0.970983	6.70005
11009	Cfa.21063.1.S1_at	0.970967	6.72898
9163	Cfa.19044.1.S1_at	0.970689	4.86497
14792	Cfa.5302.1.A1_at	0.970504	7.02826
12810	Cfa.3414.1.A1_at	0.97016	7.42311
8573	Cfa.18418.1.S1_at	0.969477	4.95437
41104	CfaAffx.7724.1.S1_at	0.968723	7.48701
23526	CfaAffx.14252.1.S1_at	0.968628	5.69908
10382	Cfa.20317.1.S1_at	0.968459	8.9809
11139	Cfa.21204.1.S1_at	0.968386	8.84883
13950	Cfa.4561.1.A1_at	0.968064	10.9935
18535	Cfa.8552.1.A1_s_at	0.96625	5.06039
18730	Cfa.871.1.S1_at	0.966211	10.0517
19579	Cfa.9524.1.A1_at	0.966173	3.61954
16517	Cfa.684.1.A1_at	0.964607	7.81173
27656	CfaAffx.19302.1.S1_at	0.96365	6.14436
34291	CfaAffx.27494.1.S1_at	0.963378	3.06203
25538	CfaAffx.16737.1.S1_at	0.963376	5.01656
34810	CfaAffx.28115.1.S1_s_at	0.962495	5.40136
23090	CfaAffx.13694.1.S1_s_at	0.9621	4.2028
2595	Cfa.12225.1.A1_at	0.962076	11.5138
14742	Cfa.5258.1.A1_s_at	0.960973	6.1123
14226	Cfa.4795.1.A1_at	0.9599	6.73226
18908	Cfa.8857.2.A1_at	0.959204	3.12593
9686	Cfa.19631.1.S1_at	0.959136	6.54634
10221	Cfa.20155.1.S1_s_at	0.959042	4.27581
22666	CfaAffx.13182.1.S1_at	0.958984	4.96121
37534	CfaAffx.3267.1.S1_at	0.95842	10.1624
26814	CfaAffx.18291.1.S1_at	0.957177	5.20837
16282	Cfa.6640.1.A1_at	0.956938	7.03159
13140	Cfa.3709.1.S1_s_at	0.956126	3.63541
32424	CfaAffx.25205.1.S1_s_at	0.955985	9.23553
40127	CfaAffx.6539.1.S1_at	0.955788	4.88432
7134	Cfa.16705.1.S1_at	0.954064	6.88663
37741	CfaAffx.3512.1.S1_s_at	0.953966	4.87648
15242	Cfa.5699.1.A1_at	0.953705	3.24387
31743	CfaAffx.24390.1.S1_at	0.953372	5.38842
14782	Cfa.5295.1.A1_at	0.95237	10.2248
29620	CfaAffx.21719.1.S1_s_at	0.951993	4.14829
10183	Cfa.20121.1.S1_at	0.951181	7.21139
1054	Cfa.10866.1.S1_s_at	0.951035	4.2239
32848	CfaAffx.2571.1.S1_at	0.95016	4.08609
38441	CfaAffx.4364.1.S1_s_at	0.949989	6.89947
23431	CfaAffx.14139.1.S1_at	0.949095	7.15851
12298	Cfa.2896.1.S1_at	0.94875	5.88849
20435	CfaAffx.10479.1.S1_at	0.948743	4.19488
2249	Cfa.11939.1.A1_s_at	0.948239	9.38133
33277	CfaAffx.26239.1.S1_at	0.946923	5.24145
17508	Cfa.7693.1.A1_at	0.946695	5.34031
40157	CfaAffx.6570.1.S1_at	0.946674	5.38505
41553	CfaAffx.8260.1.S1_s_at	0.946626	5.26252
11832	Cfa.2476.1.A1_a_at	0.946468	6.49618
28073	CfaAffx.19833.1.S1_at	0.9459	3.85204
2434	Cfa.12090.1.A1_at	0.945836	5.82199
14886	Cfa.5378.1.A1_at	0.945783	7.90619
8390	Cfa.18214.1.S1_s_at	0.94544	7.26242
29675	CfaAffx.21778.1.S1_at	0.942932	5.5253
9302	Cfa.19183.1.S1_at	0.942338	6.37326
16048	Cfa.6432.1.A1_at	0.939985	5.92716
7858	Cfa.17645.2.S1_s_at	0.939187	5.28919
18307	Cfa.8371.1.A1_at	0.938708	5.39651
21285	CfaAffx.11553.1.S1_at	0.938494	5.65028
1604	Cfa.11379.1.A1_at	0.93841	8.06141
42563	CfaAffx.9483.1.S1_at	0.937964	5.99272
23570	CfaAffx.14312.1.S1_s_at	0.937833	6.48424
4278	Cfa.13729.1.A1_at	0.937797	4.27281
151	Cfa.10044.1.A1_at	0.937738	5.8586
21227	CfaAffx.11468.1.S1_at	0.937355	4.76706
12988	Cfa.3579.1.S1_s_at	0.936702	6.16847
41224	CfaAffx.7877.1.S1_s_at	0.936657	3.3324
30751	CfaAffx.23130.1.S1_at	0.935779	5.82358
14877	Cfa.5370.1.A1_s_at	0.935612	10.2559
30294	CfaAffx.22529.1.S1_s_at	0.935532	6.36462
8868	Cfa.18722.1.S1_s_at	0.93553	5.45083
5100	Cfa.14506.1.A1_at	0.934786	8.69846
26534	CfaAffx.17944.1.S1_x_at	0.93412	6.81047
9951	Cfa.19894.1.S1_s_at	0.933609	4.8336
40259	CfaAffx.670.1.S1_s_at	0.933181	6.46096
34250	CfaAffx.27441.1.S1_s_at	0.932953	2.85437
18823	Cfa.8783.1.S1_s_at	0.932759	9.14109
33977	CfaAffx.27097.1.S1_s_at	0.9318	5.26058
29990	CfaAffx.22162.1.S1_at	0.931387	3.22822
14382	Cfa.4937.1.S1_at	0.930932	7.49897
30100	CfaAffx.22299.1.S1_s_at	0.930886	11.5509
826	Cfa.10662.1.S1_at	0.930444	6.18705
41227	CfaAffx.7881.1.S1_at	0.929574	5.43001
39418	CfaAffx.5654.1.S1_at	0.929324	4.25784
40920	CfaAffx.747.1.S1_s_at	0.928708	11.8107
12621	Cfa.3213.1.A1_at	0.928679	5.18202
28929	CfaAffx.20834.1.S1_s_at	0.928439	7.72436
37904	CfaAffx.3728.1.S1_s_at	0.927672	8.08585
22811	CfaAffx.13345.1.S1_s_at	0.926834	3.21627
26711	CfaAffx.18158.1.S1_s_at	0.926652	3.98977
671	Cfa.10533.1.S1_at	0.926079	7.92222
11365	Cfa.21510.1.S1_s_at	0.92483	5.32494
19314	Cfa.9270.1.A1_at	0.92448	5.16954
14353	Cfa.4912.1.A1_at	0.924	12.015
24536	CfaAffx.15493.1.S1_s_at	0.923523	7.03833
32557	CfaAffx.25362.1.S1_at	0.923404	5.82791
8869	Cfa.18723.1.S1_s_at	0.922922	6.08449
24303	CfaAffx.15217.1.S1_at	0.922617	8.20477
940	Cfa.10768.1.S1_at	0.922063	4.6225
7585	Cfa.17283.1.S1_at	0.921915	3.19336
7133	Cfa.16704.1.S1_at	0.920308	6.72082
12213	Cfa.282.1.A1_s_at	0.920248	2.87889
131	Cfa.10018.1.A1_s_at	0.91934	5.27278
8145	Cfa.17944.1.S1_at	0.918787	8.53788
35601	CfaAffx.29133.1.S1_s_at	0.918703	6.13465
33480	CfaAffx.26488.1.S1_at	0.918615	5.96339
19513	Cfa.9459.1.A1_s_at	0.917401	5.94791
13600	Cfa.4185.1.S1_at	0.914994	5.73508
42344	CfaAffx.9219.1.S1_at	0.914965	3.27554
11846	Cfa.2489.1.S1_at	0.914882	11.6884
40797	CfaAffx.7339.1.S1_at	0.914813	5.1252
22762	CfaAffx.13280.1.S1_s_at	0.913223	7.25351
35861	CfaAffx.29431.1.S1_at	0.913054	4.2957
11373	Cfa.21518.1.S1_s_at	0.912805	5.48314
10058	Cfa.19997.1.S1_s_at	0.91246	4.95441
24139	CfaAffx.15012.1.S1_s_at	0.91173	3.31687
28477	CfaAffx.20310.1.S1_at	0.911162	8.96141
25604	CfaAffx.16813.1.S1_at	0.909674	4.1668
1471	Cfa.11261.1.A1_at	0.90959	7.89367
9866	Cfa.19805.1.S1_at	0.90903	2.99569
36618	CfaAffx.30405.1.S1_s_at	0.90832	5.17261
14986	Cfa.5465.1.A1_s_at	0.908021	6.56307
37559	CfaAffx.3293.1.S1_s_at	0.90724	5.26057
25771	CfaAffx.17004.1.S1_at	0.905972	4.85645
4469	Cfa.13912.1.A1_at	0.905616	10.616
21605	CfaAffx.11945.1.S1_s_at	0.90405	6.09535
22752	CfaAffx.13272.1.S1_s_at	0.903933	7.54634
27863	CfaAffx.19570.1.S1_at	0.903718	5.75922
8962	Cfa.18820.1.S1_at	0.90341	5.95958
41909	CfaAffx.8695.1.S1_s_at	0.902625	5.10813
5952	Cfa.15262.3.A1_s_at	0.902184	8.62188
35668	CfaAffx.29216.1.S1_at	0.901639	8.4197
3541	Cfa.13049.1.A1_at	0.901454	7.75222
8590	Cfa.18436.1.S1_s_at	0.901402	4.77139
33934	CfaAffx.27043.1.S1_at	0.901308	4.12273
34229	CfaAffx.27412.1.S1_s_at	0.901184	3.51692
25878	CfaAffx.17146.1.S1_at	0.900887	8.69762
39062	CfaAffx.5173.1.S1_at	0.900856	3.87981
30279	CfaAffx.22509.1.S1_s_at	0.90028	4.29984
15050	Cfa.5523.1.S1_s_at	0.899491	5.95622
30075	CfaAffx.22271.1.S1_s_at	0.89944	6.27402
36895	CfaAffx.30749.1.S1_at	0.899203	5.93717
17187	Cfa.7415.1.A1_at	0.899196	7.13836
17372	Cfa.7570.1.A1_at	0.898391	8.28574
7568	Cfa.17265.1.S1_s_at	0.897844	8.03134
28127	CfaAffx.19895.1.S1_s_at	0.897194	3.95904
9303	Cfa.19183.1.S1_s_at	0.896078	5.672
9844	Cfa.19785.1.S1_s_at	0.89518	5.16996
36806	CfaAffx.30639.1.S1_s_at	0.895133	6.66788
39147	CfaAffx.5296.1.S1_at	0.895047	6.63729
27541	CfaAffx.19166.1.S1_at	0.894351	5.08162
1374	Cfa.11168.1.A1_at	0.894223	8.13262
6694	Cfa.1611.1.A1_s_at	0.894172	4.67238
19441	Cfa.9392.1.A1_at	0.891924	4.78162
7983	Cfa.17786.2.S1_a_at	0.891508	5.82165
12330	Cfa.2929.1.A1_at	0.891244	7.94819
26499	CfaAffx.17900.1.S1_at	0.891121	7.51697
4198	Cfa.13657.1.S1_s_at	0.891112	5.02553
27066	CfaAffx.18597.1.S1_at	0.891064	5.63841
27300	CfaAffx.18880.1.S1_at	0.88998	3.20975
8598	Cfa.18441.1.S1_s_at	0.889938	6.13738
29208	CfaAffx.21189.1.S1_at	0.88967	5.92579
5593	Cfa.1496.1.A1_at	0.889345	10.2785
40548	CfaAffx.7018.1.S1_s_at	0.889012	7.87555
33160	CfaAffx.26099.1.S1_at	0.888413	3.29515
29565	CfaAffx.21651.1.S1_at	0.88764	2.478
26521	CfaAffx.17926.1.S1_at	0.887477	5.03071
21716	CfaAffx.12079.1.S1_s_at	0.887362	6.0566
2191	Cfa.11891.1.A1_at	0.887067	8.08084
742	Cfa.10589.1.A1_at	0.887012	7.73827
37909	CfaAffx.3733.1.S1_at	0.886395	4.18003
8469	Cfa.18312.1.S1_s_at	0.885876	4.75092
9785	Cfa.19728.1.S1_at	0.88549	8.20761
17110	Cfa.7349.1.A1_s_at	0.885179	3.70486
41590	CfaAffx.8304.1.S1_at	0.884859	5.70845
29807	CfaAffx.2194.1.S1_s_at	0.884208	5.52966
8255	Cfa.18077.1.S1_s_at	0.883793	8.10848
40976	CfaAffx.7555.1.S1_at	0.883109	4.85465
41610	CfaAffx.8336.1.S1_at	0.882614	5.94254
697	Cfa.10558.2.S1_s_at	0.8826	6.74456
19777	Cfa.9733.1.A1_at	0.882584	7.46713
3614	Cfa.13111.1.A1_at	0.882537	8.50162
590	Cfa.10470.1.A1_at	0.882461	7.89739
8753	Cfa.18609.2.S1_s_at	0.882227	5.9811
27282	CfaAffx.18859.1.S1_s_at	0.881276	6.39821
8984	Cfa.1885.1.A1_at	0.881207	10.4399
38086	CfaAffx.3947.1.S1_s_at	0.881055	4.97934
915	Cfa.10744.1.S1_s_at	0.88072	3.45081
9093	Cfa.18970.1.S1_at	0.880623	6.24058
10711	Cfa.20778.1.S1_at	0.880473	7.56603
3529	Cfa.13040.1.A1_at	0.879871	4.10307
32304	CfaAffx.25064.1.S1_at	0.879728	9.6524
42125	CfaAffx.8936.1.S1_at	0.879606	6.66007
26562	CfaAffx.17979.1.S1_at	0.879166	5.71807
7790	Cfa.17575.1.S1_s_at	0.878986	7.82862
13777	Cfa.4418.1.A1_a_at	0.878738	7.54624
30750	CfaAffx.2313.1.S1_at	0.878545	2.95718
28437	CfaAffx.20271.1.S1_at	0.878531	7.22417
11178	Cfa.21265.1.S1_at	0.877933	7.00139
19281	Cfa.9232.1.A1_at	0.877912	3.72963
20594	CfaAffx.10688.1.S1_x_at	0.877558	12.3502
35913	CfaAffx.2951.1.S1_at	0.877197	7.69437
4180	Cfa.13640.1.A1_at	0.877017	3.39119
40705	CfaAffx.7212.1.S1_s_at	0.876956	9.4314
854	Cfa.10687.2.S1_a_at	0.876886	4.03676
365	Cfa.10261.1.S1_at	0.876225	6.47066
24735	CfaAffx.1574.1.S1_s_at	0.876103	4.08569
9671	Cfa.19618.1.S1_s_at	0.875973	6.53385
24505	CfaAffx.15455.1.S1_s_at	0.875219	4.59195
25624	CfaAffx.1684.1.S1_at	0.87504	4.59861
11132	Cfa.21192.1.S1_s_at	0.874745	3.5142
38156	CfaAffx.4032.1.S1_at	0.874647	5.91788
8068	Cfa.17864.1.S1_at	0.873422	5.04285
35611	CfaAffx.29148.1.S1_at	0.873098	4.63465
35603	CfaAffx.29135.1.S1_s_at	0.872905	6.22752
2530	Cfa.12181.1.A1_s_at	0.872535	8.02247
8785	Cfa.18645.1.S1_s_at	0.872397	6.28433
17180	Cfa.7409.1.S1_at	0.872057	4.25898
41860	CfaAffx.8629.1.S1_at	0.87198	5.36756
41248	CfaAffx.7907.1.S1_s_at	0.871508	4.64059
4235	Cfa.1369.1.A1_a_at	0.870408	9.92204
19711	Cfa.9662.1.A1_at	0.869919	8.17963
38569	CfaAffx.4532.1.S1_at	0.869442	10.7536
19839	Cfa.9801.1.A1_at	0.868835	3.78694
28587	CfaAffx.20440.1.S1_at	0.868658	5.58946
11211	Cfa.21299.1.S1_s_at	0.868553	8.71703
40931	CfaAffx.7493.1.S1_s_at	0.868253	5.77686
8307	Cfa.18137.1.S1_s_at	0.868247	4.28043
2277	Cfa.11962.1.A1_at	0.867759	10.3875
4963	Cfa.1437.1.S1_s_at	0.867757	6.04977
24541	CfaAffx.15498.1.S1_at	0.867506	4.67461
3355	Cfa.12870.1.A1_s_at	0.867363	6.70066
20009	Cfa.9981.1.A1_at	0.86683	7.19001
23982	CfaAffx.14834.1.S1_at	0.866518	6.37155
27125	CfaAffx.18662.1.S1_at	0.865108	6.06336
38508	CfaAffx.4452.1.S1_at	0.864672	7.21318
27554	CfaAffx.19186.1.S1_at	0.864266	5.25393
2707	Cfa.12321.1.A1_at	0.863799	7.79322
24508	CfaAffx.1546.1.S1_at	0.863406	4.66457
20010	Cfa.9981.1.A1_s_at	0.863158	7.97974
42665	CfaAffx.960.1.S1_at	0.863129	3.54026
40901	CfaAffx.7443.1.S1_at	0.861622	7.67021
31024	CfaAffx.23488.1.S1_s_at	0.861443	6.29505
17616	Cfa.7780.1.A1_s_at	0.861161	6.15621
37179	CfaAffx.31093.1.S1_at	0.859963	4.53128
15727	Cfa.6152.1.A1_at	0.859712	2.88277
29952	CfaAffx.22110.1.S1_s_at	0.859404	7.8674
1111	Cfa.10910.1.A1_s_at	0.858935	6.11278
40772	CfaAffx.7304.1.S1_at	0.858727	3.94591
35135	CfaAffx.2854.1.S1_at	0.858537	3.14674
11594	Cfa.2266.1.S1_at	0.857732	6.60651
34050	CfaAffx.27192.1.S1_at	0.85772	3.67579
2335	Cfa.12008.1.A1_s_at	0.857589	9.80061
38400	CfaAffx.4314.1.S1_at	0.85755	3.63805
30672	CfaAffx.23023.1.S1_s_at	0.857525	7.6773
4769	Cfa.14188.2.A1_s_at	0.856724	8.15805
11466	Cfa.21615.1.S1_s_at	0.856489	6.02369
24845	CfaAffx.15878.1.S1_s_at	0.85646	5.14719
2728	Cfa.12340.1.A1_at	0.856076	7.84462
6297	Cfa.1559.1.A1_at	0.855902	8.49382
39106	CfaAffx.5235.1.S1_at	0.855797	4.58828
36004	CfaAffx.29627.1.S1_s_at	0.855445	3.6226
41250	CfaAffx.791.1.S1_s_at	0.855432	9.88244
16711	Cfa.6999.1.S1_at	0.855296	9.57678
26663	CfaAffx.18103.1.S1_at	0.855071	4.99382
37753	CfaAffx.3529.1.S1_at	0.854995	4.56241
16609	Cfa.6914.1.A1_at	0.854179	3.79308
8203	Cfa.18007.1.S1_at	0.854127	5.62865
38092	CfaAffx.3951.1.S1_x_at	0.85389	3.3187
38598	CfaAffx.4568.1.S1_at	0.853484	6.89566
299	Cfa.102.1.S1_s_at	0.853256	4.91451
28770	CfaAffx.2067.1.S1_s_at	0.853005	5.11883
37168	CfaAffx.3108.1.S1_s_at	0.852845	6.25179
11619	Cfa.2286.1.S1_s_at	0.852711	7.24116
19560	Cfa.9503.2.A1_at	0.852592	6.89048
41150	CfaAffx.7788.1.S1_at	0.852196	5.70688
21183	CfaAffx.1141.1.S1_at	0.851773	4.32036
7053	Cfa.16572.1.A1_at	0.851702	5.07535
38353	CfaAffx.4263.1.S1_at	0.851489	4.83948
14054	Cfa.465.2.S1_s_at	0.850913	5.26956
8386	Cfa.18211.1.A1_at	0.850895	6.97423
25066	CfaAffx.16143.1.S1_at	0.850852	3.91498
41008	CfaAffx.759.1.S1_at	0.850798	3.91443
825	Cfa.10661.1.A1_at	0.850676	4.27223
21118	CfaAffx.11316.1.S1_at	0.849884	6.17456
20731	CfaAffx.10864.1.S1_at	0.849832	9.90907
23946	CfaAffx.14796.1.S1_at	0.849717	2.89368
9465	Cfa.19427.1.S1_s_at	0.848999	3.15879
996	Cfa.10817.1.A1_at	0.848961	4.09229
22514	CfaAffx.13019.1.S1_s_at	0.848959	9.54148
26686	CfaAffx.1813.1.S1_s_at	0.848765	5.66312
22648	CfaAffx.13161.1.S1_s_at	0.848684	5.29081
31476	CfaAffx.24052.1.S1_s_at	0.848441	3.53355
13540	Cfa.4098.1.S1_s_at	0.84826	4.27216
28414	CfaAffx.20239.1.S1_at	0.84797	10.0526
37862	CfaAffx.3670.1.S1_at	0.847903	6.72006
10448	Cfa.20388.1.S1_s_at	0.847818	3.50938
8388	Cfa.18212.1.S1_s_at	0.846633	7.06512
42929	CfaAffx.9942.1.S1_s_at	0.846177	9.25029
10057	Cfa.19997.1.S1_at	0.845756	5.16367
12904	Cfa.3505.1.S1_s_at	0.845705	3.95193
14550	Cfa.509.1.A1_at	0.845512	8.04102
8360	Cfa.18187.1.S1_s_at	0.84526	4.26737
9722	Cfa.1967.1.A1_at	0.845144	4.47131
41038	CfaAffx.7631.1.S1_s_at	0.845134	6.3848
23798	CfaAffx.14608.1.S1_s_at	0.845093	5.02891
14634	Cfa.5163.1.A1_at	0.844928	5.09679
17600	Cfa.7769.1.A1_at	0.844277	3.33422
42316	CfaAffx.9177.1.S1_s_at	0.843977	6.54909
11417	Cfa.21563.1.S1_s_at	0.843901	5.63819
32684	CfaAffx.25509.1.S1_at	0.843524	6.35639
39725	CfaAffx.6033.1.S1_s_at	0.842917	3.33344
35586	CfaAffx.29114.1.S1_at	0.842822	4.57773
19995	Cfa.9967.1.A1_at	0.842206	6.07085
12673	Cfa.3265.1.A1_s_at	0.841929	6.41541
31468	CfaAffx.24044.1.S1_at	0.84138	5.342
25510	CfaAffx.16707.1.S1_s_at	0.841235	7.86742
29171	CfaAffx.21139.1.S1_at	0.840764	8.90813
11940	Cfa.2571.1.A1_at	0.840749	5.27061
34448	CfaAffx.27691.1.S1_at	0.840529	5.43135
22006	CfaAffx.12430.1.S1_at	0.839841	7.90774
38739	CfaAffx.4732.1.S1_at	0.839278	5.06887
41034	CfaAffx.7626.1.S1_at	0.839128	4.80424
23069	CfaAffx.13661.1.S1_s_at	0.839036	3.27051
24777	CfaAffx.15790.1.S1_at	0.838925	7.67735
23528	CfaAffx.14255.1.S1_at	0.838766	5.638
12553	Cfa.3145.1.A1_at	0.838362	5.92736
13576	Cfa.4147.1.A1_at	0.837406	4.55227
20172	CfaAffx.10177.1.S1_at	0.836403	6.80029
6034	Cfa.15347.1.A1_s_at	0.835781	5.72566
34947	CfaAffx.28284.1.S1_at	0.835666	6.17382
20533	CfaAffx.10605.1.S1_at	0.835374	4.73867
20204	CfaAffx.10216.1.S1_at	0.83531	4.67402
28617	CfaAffx.20471.1.S1_at	0.835252	4.86451
33691	CfaAffx.2673.1.S1_s_at	0.835193	6.60304
30016	CfaAffx.2220.1.S1_s_at	0.835161	6.93432
27430	CfaAffx.1904.1.S1_s_at	0.834761	3.01296
29006	CfaAffx.20935.1.S1_at	0.834629	4.53538
19378	Cfa.9335.1.A1_at	0.834249	2.9484
25055	CfaAffx.16132.1.S1_at	0.83404	6.17313
4331	Cfa.13779.1.A1_at	0.833849	4.2919
39436	CfaAffx.5675.1.S1_at	0.833513	3.02484
2257	Cfa.11947.1.A1_s_at	0.833185	7.6217
12423	Cfa.3012.1.A1_at	0.833168	10.1571
2487	Cfa.12134.1.A1_at	0.83291	6.13571
2124	Cfa.11835.1.A1_s_at	0.83229	4.64424
11983	Cfa.2613.1.S1_at	0.832142	8.02397
9529	Cfa.19487.1.S1_at	0.832085	8.29059
28448	CfaAffx.20286.1.S1_s_at	0.83185	7.51122
42887	CfaAffx.9887.1.S1_s_at	0.831231	5.69931
22151	CfaAffx.12605.1.S1_at	0.831182	5.98227
37806	CfaAffx.3602.1.S1_at	0.830674	4.20698
6255	Cfa.15549.1.A1_s_at	0.830406	2.98426
11971	Cfa.260.1.S1_at	0.830334	10.213
12433	Cfa.3026.1.A1_at	0.830301	6.70007
15900	Cfa.6300.1.A1_at	0.829785	8.38835
18118	Cfa.8215.1.A1_at	0.829664	9.69448
32893	CfaAffx.25753.1.S1_s_at	0.829663	5.20568
8978	Cfa.18840.1.S1_at	0.829511	7.95837
12340	Cfa.2937.1.A1_at	0.828823	8.50907
12493	Cfa.3083.1.S1_at	0.828497	7.66561
35942	CfaAffx.29541.1.S1_at	0.82849	2.86797
19562	Cfa.9506.1.A1_at	0.828411	8.59219
40351	CfaAffx.6795.1.S1_s_at	0.828322	4.83994
3423	Cfa.1293.1.A1_at	0.827917	10.6131
15970	Cfa.6362.1.A1_at	0.827344	2.70699
8387	Cfa.18211.1.A1_s_at	0.826768	6.22053
9238	Cfa.19137.1.A1_at	0.826665	6.12541
32864	CfaAffx.25722.1.S1_at	0.826503	3.54077
21084	CfaAffx.11268.1.S1_s_at	0.825529	4.74638
9543	Cfa.1950.1.S1_at	0.824582	3.93772
12846	Cfa.3455.1.A1_at	0.824495	3.39856
22316	CfaAffx.12799.1.S1_s_at	0.824469	4.82788
25608	CfaAffx.16818.1.S1_at	0.824466	3.067
36746	CfaAffx.30567.1.S1_at	0.821997	4.52422
19320	Cfa.9276.1.A1_at	0.821881	4.51338
11606	Cfa.2274.1.A1_at	0.82186	5.28868
19423	Cfa.9377.1.A1_at	0.821624	4.59187
14070	Cfa.4663.1.S1_a_at	0.821343	6.00877
2125	Cfa.11836.1.A1_at	0.821333	6.92162
20664	CfaAffx.10780.1.S1_at	0.821167	3.64537
13532	Cfa.4089.1.S1_at	0.820879	5.53726
6637	Cfa.15997.1.S1_at	0.820661	4.76297
19820	Cfa.9777.1.A1_at	0.820613	3.43085
39572	CfaAffx.5845.1.S1_at	0.82052	4.39464
2326	Cfa.12000.1.A1_at	0.820337	7.57118
19395	Cfa.9351.1.A1_s_at	0.820335	3.46014
34343	CfaAffx.27557.1.S1_s_at	0.819365	2.46724
15669	Cfa.6092.1.A1_at	0.81926	5.06623
7897	Cfa.17697.1.S1_s_at	0.819243	5.11611
37338	CfaAffx.31279.1.S1_at	0.819154	5.84615
9386	Cfa.19340.1.S1_s_at	0.81899	7.76695
42939	CfaAffx.9956.1.S1_s_at	0.818432	6.51719
22068	CfaAffx.12504.1.S1_at	0.818318	5.876
32236	CfaAffx.24985.1.S1_at	0.81778	3.43704
301	Cfa.10200.1.A1_at	0.817256	4.1092
40782	CfaAffx.7317.1.S1_at	0.817223	5.35202
9075	Cfa.18951.1.S1_at	0.817198	12.0325
6131	Cfa.15436.1.A1_at	0.816655	3.44159
23045	CfaAffx.13633.1.S1_at	0.815821	5.93159
32195	CfaAffx.24939.1.S1_s_at	0.815537	5.94898
21437	CfaAffx.11752.1.S1_s_at	0.815316	3.87177
1830	Cfa.11579.1.A1_s_at	0.814707	5.81714
20128	CfaAffx.10124.1.S1_s_at	0.814563	6.57255
6228	Cfa.15527.1.A1_at	0.814548	6.32153
25116	CfaAffx.16210.1.S1_at	0.814506	4.63167
16519	Cfa.6841.1.A1_at	0.814256	7.41913
40818	CfaAffx.736.1.S1_at	0.813815	3.11974
13543	Cfa.41.1.S1_s_at	0.812946	8.19663
1693	Cfa.11452.2.A1_s_at	0.812871	4.42668
3465	Cfa.12978.1.S1_at	0.812486	3.19266
9486	Cfa.19447.1.S1_at	0.812401	6.52763
19242	Cfa.9199.1.A1_at	0.812238	8.46203
32403	CfaAffx.25179.1.S1_s_at	0.811692	4.06796
27669	CfaAffx.19324.1.S1_at	0.811024	4.98239
3774	Cfa.13270.1.S1_at	0.810888	4.82123
32764	CfaAffx.25606.1.S1_s_at	0.810724	5.05425
21737	CfaAffx.12103.1.S1_s_at	0.810607	4.21626
9086	Cfa.18964.1.S1_at	0.810449	3.96862
33197	CfaAffx.26144.1.S1_at	0.810284	8.04533
38401	CfaAffx.4315.1.S1_s_at	0.810276	7.21048
15542	Cfa.5971.1.A1_at	0.809603	5.30996
37803	CfaAffx.36.1.S1_at	0.809515	9.35165
20934	CfaAffx.11093.1.S1_s_at	0.809402	6.07842
41207	CfaAffx.7855.1.S1_at	0.809257	5.23915
22164	CfaAffx.12617.1.S1_x_at	0.808897	13.1484
24692	CfaAffx.15683.1.S1_s_at	0.808897	4.0311
7154	Cfa.16732.1.A1_at	0.808849	6.19767
5801	Cfa.15134.1.A1_s_at	0.80867	8.78925
35138	CfaAffx.28543.1.S1_s_at	0.808461	7.10583
38213	CfaAffx.4092.1.S1_s_at	0.807976	9.58058
29516	CfaAffx.21590.1.S1_at	0.807665	4.68816
31154	CfaAffx.23654.1.S1_s_at	0.807543	2.90284
17808	Cfa.7952.1.A1_at	0.806962	5.79038
9043	Cfa.18916.1.S1_at	0.806811	4.35896
32815	CfaAffx.2567.1.S1_at	0.806787	2.51284
21273	CfaAffx.1153.1.S1_s_at	0.806605	3.92454
31326	CfaAffx.23889.1.S1_s_at	0.804534	5.58378
31106	CfaAffx.23589.1.S1_s_at	0.804349	4.60103
25772	CfaAffx.17004.1.S1_s_at	0.803979	4.92585
8443	Cfa.1827.1.S1_at	0.803965	3.25012
39162	CfaAffx.5317.1.S1_at	0.803382	7.22254
11525	Cfa.22.1.S1_at	0.803317	5.48145
25911	CfaAffx.17179.1.S1_at	0.803073	4.78953
20559	CfaAffx.10640.1.S1_s_at	0.802884	3.06563
23825	CfaAffx.14649.1.S1_at	0.802684	8.15866
1664	Cfa.11425.1.A1_at	0.802313	4.98358
2509	Cfa.12160.1.A1_at	0.802078	4.5293
21225	CfaAffx.11465.1.S1_at	0.80173	4.51838
33857	CfaAffx.26955.1.S1_at	0.801708	4.86302
5502	Cfa.14882.1.A1_at	0.801657	3.27127
28299	CfaAffx.20100.1.S1_at	0.800724	3.36507
20933	CfaAffx.11093.1.S1_at	0.800375	6.02366
33095	CfaAffx.26011.1.S1_at	0.800327	5.88958
1285	Cfa.11081.1.S1_at	0.800318	11.6977
41558	CfaAffx.8264.1.S1_s_at	0.800236	5.09383
18367	Cfa.8415.1.A1_at	0.800143	3.73069
41465	CfaAffx.8144.1.S1_s_at	0.800125	4.89454
2505	Cfa.12156.1.A1_at	0.799806	6.03832
21524	CfaAffx.11863.1.S1_s_at	0.799684	2.46334
41447	CfaAffx.8124.1.S1_s_at	0.799328	5.4807
42217	CfaAffx.9050.1.S1_s_at	0.799246	9.89745
9346	Cfa.19253.1.S1_at	0.798918	7.17051
31275	CfaAffx.23818.1.S1_s_at	0.798494	7.10469
10703	Cfa.20764.1.S1_s_at	0.798423	4.18095
27184	CfaAffx.18720.1.S1_s_at	0.798119	4.41392
270	Cfa.10171.1.A1_at	0.798081	8.38132
10579	Cfa.2061.1.A1_at	0.797452	5.07112
1929	Cfa.11665.1.A1_at	0.797423	6.28118
34948	CfaAffx.28284.1.S1_s_at	0.797037	6.74701
15744	Cfa.617.1.A1_s_at	0.797024	7.33178
12527	Cfa.3119.1.A1_s_at	0.796997	6.27059
8999	Cfa.18875.1.S1_s_at	0.796888	4.07913
39888	CfaAffx.6235.1.S1_s_at	0.796593	3.31107
26854	CfaAffx.18337.1.S1_at	0.796526	5.84398
11063	Cfa.21128.1.S1_s_at	0.796458	3.52296
5704	Cfa.15052.1.A1_s_at	0.796315	5.54651
41890	CfaAffx.8672.1.S1_s_at	0.795977	10.7829
5213	Cfa.14605.1.A1_at	0.79584	8.8347
22872	CfaAffx.13411.1.S1_s_at	0.795294	6.35014
1552	Cfa.1133.1.A1_s_at	0.795161	8.82116
2534	Cfa.12185.1.A1_at	0.79485	7.87325
5559	Cfa.14925.1.A1_s_at	0.794524	5.39409
39441	CfaAffx.5678.1.S1_s_at	0.793745	5.83449
12146	Cfa.2757.1.S1_at	0.79361	7.19445
42062	CfaAffx.8873.1.S1_s_at	0.793495	4.47731
9946	Cfa.19888.1.A1_at	0.79247	7.39925
9133	Cfa.19013.1.S1_s_at	0.792032	4.20721
36466	CfaAffx.30194.1.S1_at	0.791607	6.463
18534	Cfa.8552.1.A1_at	0.791419	7.12219
20696	CfaAffx.10828.1.S1_at	0.791097	2.48245
21203	CfaAffx.11439.1.S1_s_at	0.790301	5.04105
33538	CfaAffx.26551.1.S1_s_at	0.790164	5.84514
15921	Cfa.6325.1.S1_s_at	0.790156	8.49894
39792	CfaAffx.6134.1.S1_at	0.78958	3.36545
35666	CfaAffx.29214.1.S1_at	0.7895	5.05646
37782	CfaAffx.3570.1.S1_s_at	0.789446	10.3436
2029	Cfa.11754.1.A1_at	0.788728	3.46166
2538	Cfa.12189.1.A1_at	0.78854	9.37791
30139	CfaAffx.22345.1.S1_at	0.788382	4.6544
10950	Cfa.21008.1.S1_s_at	0.787266	5.58182
32592	CfaAffx.254.1.S1_at	0.78722	3.6635
29548	CfaAffx.21632.1.S1_s_at	0.78719	6.18776
33129	CfaAffx.26063.1.S1_at	0.787139	5.60606
41540	CfaAffx.8245.1.S1_s_at	0.787102	5.24196
1644	Cfa.11409.3.S1_s_at	0.786989	5.663
32079	CfaAffx.24826.1.S1_s_at	0.786598	4.07054
35555	CfaAffx.29080.1.S1_s_at	0.786508	6.37271
14716	Cfa.5235.1.A1_s_at	0.786076	11.3821
705	Cfa.10564.1.A1_at	0.785862	7.48659
1408	Cfa.11198.1.A1_at	0.785669	7.34169
11710	Cfa.2363.1.A1_at	0.785485	8.32831
25767	CfaAffx.17.1.S1_s_at	0.785294	4.21075
28913	CfaAffx.20817.1.S1_s_at	0.785137	5.295
5466	Cfa.14842.1.A1_at	0.784914	6.06065
23435	CfaAffx.14145.1.S1_at	0.784711	6.37186
20049	CfaAffx.10030.1.S1_s_at	0.7844	6.5514
10989	Cfa.21042.1.S1_s_at	0.784377	7.39217
32629	CfaAffx.25442.1.S1_at	0.784312	5.43188
29676	CfaAffx.21779.1.S1_at	0.78416	5.59374
30563	CfaAffx.2289.1.S1_at	0.783786	4.85318
9798	Cfa.19741.1.S1_s_at	0.783575	5.69526
10911	Cfa.20976.1.S1_at	0.783509	3.165
15743	Cfa.6169.1.A1_at	0.783408	6.34289
37281	CfaAffx.3122.1.S1_at	0.783241	5.30755
19745	Cfa.9698.1.A1_at	0.7827	2.47645
1994	Cfa.11725.1.A1_at	0.782393	7.02018
29004	CfaAffx.20932.1.S1_at	0.781918	6.48719
24300	CfaAffx.15213.1.S1_s_at	0.781825	8.12625
12534	Cfa.3121.4.S1_s_at	0.781623	10.9653
12870	Cfa.3473.1.S1_at	0.781562	5.73433
15448	Cfa.5885.1.S1_s_at	0.781559	8.16435
5973	Cfa.15283.1.A1_at	0.781492	4.55616
28160	CfaAffx.19935.1.S1_s_at	0.781114	3.53025
24778	CfaAffx.15790.1.S1_s_at	0.780856	8.89256
13663	Cfa.4292.2.A1_a_at	0.780427	4.52137
15645	Cfa.6070.1.S1_s_at	0.77998	7.39247
35917	CfaAffx.29516.1.S1_s_at	0.779943	5.23377
11492	Cfa.2168.1.A1_at	0.779868	6.43747
10945	Cfa.21005.1.S1_s_at	0.77986	6.13219
15627	Cfa.6054.1.S1_at	0.779661	8.22757
1601	Cfa.11376.1.A1_at	0.779469	7.2365
9402	Cfa.19355.1.S1_s_at	0.778562	4.05648
16579	Cfa.6891.1.A1_s_at	0.778514	5.98099
4128	Cfa.13595.1.A1_at	0.778479	5.46771
27088	CfaAffx.18623.1.S1_s_at	0.7784	6.97806
42480	CfaAffx.9368.1.S1_s_at	0.778261	7.1493
12395	Cfa.299.1.A1_s_at	0.777981	12.6028
22318	CfaAffx.1280.1.S1_at	0.77731	4.70738
2018	Cfa.11745.1.A1_s_at	0.777293	9.62649
34034	CfaAffx.27175.1.S1_at	0.777118	5.58221
2308	Cfa.11989.1.A1_at	0.776566	2.96937
17480	Cfa.7667.1.S1_at	0.775424	4.85028
16803	Cfa.7077.1.A1_s_at	0.775319	5.59082
1575	Cfa.11351.1.A1_at	0.775197	6.97062
22424	CfaAffx.12916.1.S1_s_at	0.775112	4.31929
9759	Cfa.19702.1.S1_at	0.774756	3.9629
36332	CfaAffx.30007.1.S1_at	0.774543	5.03659
20620	CfaAffx.10723.1.S1_s_at	0.774261	6.58066
42822	CfaAffx.9800.1.S1_at	0.774152	4.90615
42741	CfaAffx.9696.1.S1_s_at	0.773904	7.71121
13554	Cfa.4113.1.S1_at	0.773234	9.45863
35181	CfaAffx.28589.1.S1_at	0.77313	5.99156
6158	Cfa.15460.1.A1_at	0.772871	7.85118
42355	CfaAffx.9230.1.S1_at	0.772049	3.14486
10686	Cfa.20748.1.S1_s_at	0.771842	4.95815
9521	Cfa.19479.1.S1_s_at	0.771679	6.16842
7907	Cfa.17710.2.S1_s_at	0.771374	2.93558
4580	Cfa.14019.1.S1_at	0.771244	10.3881
36541	CfaAffx.30291.1.S1_s_at	0.77117	5.65408
41228	CfaAffx.7881.1.S1_s_at	0.770963	7.08537
7779	Cfa.17561.1.S1_at	0.770901	5.46386
28489	CfaAffx.20325.1.S1_at	0.770821	7.9455
9989	Cfa.19935.1.S1_s_at	0.770394	3.27131
34733	CfaAffx.28031.1.S1_s_at	0.770157	3.19369
14925	Cfa.5411.1.A1_s_at	0.769527	5.5907
40962	CfaAffx.7536.1.S1_s_at	0.768387	10.7086
427	Cfa.1032.1.A1_at	0.767597	10.2248
25142	CfaAffx.16234.1.S1_at	0.767211	5.00346
38502	CfaAffx.4443.1.S1_at	0.766784	5.88175
34261	CfaAffx.27455.1.S1_s_at	0.766756	5.75242
20977	CfaAffx.11139.1.S1_at	0.766737	4.45664
41234	CfaAffx.7890.1.S1_at	0.766712	6.5748
22277	CfaAffx.1276.1.S1_at	0.766638	4.43969
14836	Cfa.534.2.A1_at	0.76655	5.54297
38830	CfaAffx.4845.1.S1_at	0.766444	6.27946
25547	CfaAffx.16749.1.S1_s_at	0.766405	3.14116
30646	CfaAffx.230.1.S1_at	0.766203	5.3146
17867	Cfa.8007.1.A1_at	0.765998	9.45517
26930	CfaAffx.18433.1.S1_at	0.76575	7.94635
386	Cfa.1028.1.A1_s_at	0.765703	9.82855
21213	CfaAffx.1145.1.S1_at	0.765661	6.34049
13464	Cfa.3978.1.S1_at	0.765483	7.48728
10521	Cfa.20501.1.S1_at	0.76538	6.91058
2603	Cfa.12232.1.A1_s_at	0.765303	9.73709
3323	Cfa.12840.1.A1_at	0.765296	3.65081
42184	CfaAffx.9007.1.S1_s_at	0.765034	4.30447
32369	CfaAffx.25141.1.S1_s_at	0.764658	7.59921
31915	CfaAffx.24613.1.S1_s_at	0.764584	5.46644
14963	Cfa.5448.1.S1_at	0.764476	8.40357
9613	Cfa.19564.1.S1_at	0.764338	3.54976
41573	CfaAffx.8282.1.S1_at	0.764291	4.27357
29071	CfaAffx.21007.1.S1_at	0.764093	3.28052
16559	Cfa.6875.1.S1_at	0.763622	2.66292
41811	CfaAffx.8564.1.S1_at	0.763388	3.74711
32701	CfaAffx.25527.1.S1_at	0.763373	8.0467
3129	Cfa.12668.1.A1_at	0.763306	3.57243
11070	Cfa.21134.1.S1_s_at	0.762586	6.70145
9358	Cfa.19284.1.S1_at	0.762228	5.07319
2183	Cfa.11883.1.A1_s_at	0.762206	4.42949
2181	Cfa.11882.1.A1_at	0.762176	4.5655
5856	Cfa.15181.1.A1_at	0.761959	7.18955
2850	Cfa.12430.1.A1_s_at	0.761929	6.22544
21691	CfaAffx.12044.1.S1_s_at	0.761843	6.74233
26240	CfaAffx.17566.1.S1_at	0.761624	3.91684
15904	Cfa.6305.1.S1_at	0.761434	10.1811
31420	CfaAffx.23992.1.S1_s_at	0.761211	5.38895
23521	CfaAffx.14247.1.S1_at	0.760351	4.5674
4142	Cfa.13608.1.A1_at	0.759809	2.8696
24588	CfaAffx.1556.1.S1_s_at	0.759645	6.8071
605	Cfa.10484.1.S1_at	0.759604	9.25139
5757	Cfa.15094.2.S1_a_at	0.759603	11.2108
27255	CfaAffx.1882.1.S1_s_at	0.75914	6.51648
38177	CfaAffx.4057.1.S1_at	0.758904	5.11262
19252	Cfa.9207.1.A1_at	0.75865	9.43493
21418	CfaAffx.11727.1.S1_s_at	0.757954	6.58104
22658	CfaAffx.13170.1.S1_at	0.757404	3.99986
9655	Cfa.19601.1.S1_s_at	0.757378	4.39367
23502	CfaAffx.14226.1.S1_s_at	0.757071	8.59697
716	Cfa.1057.1.A1_at	0.756463	5.78073
1618	Cfa.1139.1.A1_at	0.756191	8.06237
13513	Cfa.4056.1.S1_at	0.756129	5.87038
37991	CfaAffx.3825.1.S1_s_at	0.756067	6.11236
35159	CfaAffx.28567.1.S1_s_at	0.755928	7.18062
6986	Cfa.16462.1.S1_s_at	0.754649	7.25717
35862	CfaAffx.29432.1.S1_at	0.754507	3.39346
22809	CfaAffx.13343.1.S1_s_at	0.754099	3.9134
27725	CfaAffx.19392.1.S1_at	0.754013	2.8567
4467	Cfa.13910.1.A1_at	0.753831	4.39131
8682	Cfa.18536.1.S1_s_at	0.753761	5.2749
41163	CfaAffx.7805.1.S1_s_at	0.753428	5.93165
6604	Cfa.15944.1.A1_at	0.752783	3.077
10697	Cfa.20758.1.S1_at	0.752237	6.77975
38130	CfaAffx.4005.1.S1_s_at	0.751881	3.54881
10611	Cfa.20663.1.A1_s_at	0.751836	8.43023
30341	CfaAffx.22592.1.S1_at	0.751827	4.58581
27918	CfaAffx.19637.1.S1_at	0.751826	2.93446
15951	Cfa.635.1.A1_at	0.751811	8.85761
12139	Cfa.2752.2.S1_at	0.751755	6.40281
12962	Cfa.3556.1.S1_s_at	0.751627	8.04025
9710	Cfa.19657.1.S1_at	0.750673	2.47917
30528	CfaAffx.2284.1.S1_s_at	0.750441	3.20242
31953	CfaAffx.24673.1.S1_at	0.750401	8.46507
9956	Cfa.19899.1.S1_s_at	0.749769	7.69476
27264	CfaAffx.18836.1.S1_at	0.749366	4.64129
30478	CfaAffx.2277.1.S1_s_at	0.749078	7.01166
36919	CfaAffx.30787.1.S1_at	0.749045	4.28968
11192	Cfa.21281.1.S1_s_at	0.748823	6.77195
16604	Cfa.6910.1.A1_at	0.748791	4.56196
10840	Cfa.20907.1.S1_a_at	0.748742	9.30273
21193	CfaAffx.11424.1.S1_at	0.747535	4.75146
19633	Cfa.9579.1.A1_at	0.747189	6.02863
37200	CfaAffx.31123.1.S1_at	0.747188	5.1204
24762	CfaAffx.15776.1.S1_s_at	0.746887	4.17986
21157	CfaAffx.11370.1.S1_s_at	0.746322	5.33204
21342	CfaAffx.11625.1.S1_at	0.74603	3.21267
7751	Cfa.17531.1.S1_s_at	0.745801	9.25714
23057	CfaAffx.13647.1.S1_at	0.744343	4.7517
275	Cfa.10176.1.A1_at	0.744311	4.61234
37722	CfaAffx.3494.1.S1_s_at	0.744277	6.51779
1789	Cfa.11542.1.A1_at	0.744176	7.01355
2189	Cfa.11889.1.A1_at	0.743841	3.01035
33155	CfaAffx.26090.1.S1_at	0.743679	3.42048
8767	Cfa.18627.1.S1_s_at	0.743453	9.22243
25217	CfaAffx.1632.1.S1_s_at	0.743369	6.35904
7587	Cfa.17285.1.S1_at	0.742944	4.65199
31918	CfaAffx.24617.1.S1_at	0.742799	6.27807
38664	CfaAffx.4642.1.S1_at	0.742359	4.71229
34355	CfaAffx.27575.1.S1_s_at	0.741936	7.76546
17243	Cfa.7465.1.A1_at	0.741099	6.65763
20531	CfaAffx.10600.1.S1_at	0.741057	5.89025
27691	CfaAffx.19346.1.S1_s_at	0.741055	5.288
6933	Cfa.16395.1.S1_s_at	0.740672	6.32279
7645	Cfa.17350.1.S1_s_at	0.74055	5.03539
17117	Cfa.7355.1.A1_at	0.740515	8.33218
21364	CfaAffx.11656.1.S1_at	0.740228	7.31497
1860	Cfa.11605.1.A1_s_at	0.740163	4.73898
30900	CfaAffx.23314.1.S1_s_at	0.739798	5.42216
33363	CfaAffx.26344.1.S1_s_at	0.739705	4.22453
10261	Cfa.20194.1.S1_s_at	0.739157	6.97177
38461	CfaAffx.4392.1.S1_s_at	0.738817	3.7589
6037	Cfa.15349.1.A1_at	0.738814	4.94326
20290	CfaAffx.10305.1.S1_at	0.738795	2.52726
9731	Cfa.19678.2.A1_at	0.738574	6.19474
11813	Cfa.2458.1.S1_s_at	0.738417	3.93533
36030	CfaAffx.29652.1.S1_at	0.738257	7.8845
10646	Cfa.20704.1.S1_at	0.73787	9.12735
12508	Cfa.3099.1.A1_at	0.737857	5.85325
17373	Cfa.7570.1.A1_s_at	0.737733	6.02511
9860	Cfa.198.1.S1_s_at	0.737472	7.3046
42908	CfaAffx.9917.1.S1_s_at	0.737233	7.1351
16466	Cfa.680.1.S1_at	0.737195	5.95073
23850	CfaAffx.14676.1.S1_at	0.737068	7.76633
924	Cfa.10753.1.A1_at	0.736742	10.0226
39180	CfaAffx.5350.1.S1_at	0.736339	7.55472
21589	CfaAffx.1193.1.S1_at	0.736199	5.19703
42609	CfaAffx.9542.1.S1_at	0.736156	4.47825
13497	Cfa.4020.1.S1_at	0.736132	7.43386
16243	Cfa.6609.1.S1_at	0.735968	6.72985
37142	CfaAffx.31051.1.S1_s_at	0.735847	6.85893
10483	Cfa.20450.1.S1_at	0.735734	8.76743
28977	CfaAffx.20898.1.S1_s_at	0.734951	4.41211
30242	CfaAffx.22452.1.S1_s_at	0.734908	4.45147
32190	CfaAffx.24931.1.S1_s_at	0.734499	6.78271
40326	CfaAffx.6771.1.S1_s_at	0.73381	4.77666
7394	Cfa.1704.1.A1_at	0.733472	5.47984
12372	Cfa.2967.1.A1_at	0.733281	7.51341
38879	CfaAffx.4908.1.S1_s_at	0.733245	5.18616
14575	Cfa.5111.1.A1_s_at	0.733018	2.92592
21088	CfaAffx.11273.1.S1_at	0.732762	8.36154
41138	CfaAffx.7766.1.S1_s_at	0.732681	7.35672
24939	CfaAffx.15996.1.S1_at	0.732223	4.11205
25122	CfaAffx.16217.1.S1_at	0.73218	2.5652
29461	CfaAffx.21517.1.S1_s_at	0.73208	4.97175
8638	Cfa.18486.1.S1_s_at	0.732062	5.85353
11438	Cfa.21589.1.S1_s_at	0.731747	6.63152
42021	CfaAffx.8831.1.S1_at	0.731345	7.54047
36259	CfaAffx.29926.1.S1_at	0.730978	3.30436
11985	Cfa.2615.1.S1_at	0.730715	4.9496
41831	CfaAffx.8594.1.S1_s_at	0.730628	3.83684
24558	CfaAffx.15522.1.S1_s_at	0.730605	6.4231
38662	CfaAffx.464.1.S1_at	0.730531	4.615
40558	CfaAffx.7032.1.S1_at	0.730307	3.26227
30080	CfaAffx.22274.1.S1_x_at	0.730257	5.08682
1919	Cfa.11656.1.A1_s_at	0.730083	8.46856
40926	CfaAffx.748.1.S1_s_at	0.730024	4.08461
28859	CfaAffx.20764.1.S1_at	0.729633	4.0072
26322	CfaAffx.17668.1.S1_s_at	0.729382	3.89658
6194	Cfa.15496.1.A1_at	0.729323	8.90429
12281	Cfa.2880.2.A1_s_at	0.729305	7.63947
34569	CfaAffx.27850.1.S1_at	0.729195	2.74525
40389	CfaAffx.6840.1.S1_at	0.729116	4.74536
20450	CfaAffx.1050.1.S1_at	0.729102	3.05617
37795	CfaAffx.359.1.S1_s_at	0.728778	7.5145
42844	CfaAffx.9824.1.S1_at	0.728773	6.07768
3278	Cfa.12801.1.A1_s_at	0.728611	3.25293
8407	Cfa.1823.1.S1_at	0.728396	5.94635
31967	CfaAffx.24692.1.S1_at	0.728151	7.79602
8525	Cfa.18365.1.S1_s_at	0.727454	3.14666
18645	Cfa.8639.1.A1_s_at	0.727237	4.68421
41005	CfaAffx.7586.1.S1_at	0.726649	3.16435
7551	Cfa.1724.2.A1_at	0.7263	5.88058
40331	CfaAffx.6779.1.S1_at	0.725781	4.66549
3010	Cfa.12571.1.A1_at	0.725679	6.20713
2497	Cfa.12146.1.A1_at	0.725619	5.47845
16433	Cfa.677.2.S1_s_at	0.725594	6.13353
40330	CfaAffx.6775.1.S1_at	0.725478	5.36406
21355	CfaAffx.11647.1.S1_at	0.725268	5.55274
10522	Cfa.20501.1.S1_s_at	0.725248	6.61012
15468	Cfa.5903.1.A1_at	0.724873	4.98025
36146	CfaAffx.29787.1.S1_s_at	0.724834	7.25099
34363	CfaAffx.27590.1.S1_s_at	0.724612	5.08084
11011	Cfa.21066.1.S1_s_at	0.724405	6.48989
42800	CfaAffx.9768.1.S1_s_at	0.724383	5.29511
32765	CfaAffx.25607.1.S1_s_at	0.724153	5.38822
15347	Cfa.5798.1.A1_at	0.724002	4.85366
12272	Cfa.2874.1.A1_at	0.723835	2.45073
30638	CfaAffx.2299.1.S1_s_at	0.723692	4.84313
30566	CfaAffx.22896.1.S1_s_at	0.723388	4.14733
8827	Cfa.18685.1.S1_s_at	0.723373	6.89687
29940	CfaAffx.22097.1.S1_at	0.723163	3.0075
12347	Cfa.2943.1.A1_at	0.723092	8.18745
9387	Cfa.19341.1.S1_at	0.723085	4.21283
22368	CfaAffx.12852.1.S1_at	0.722883	4.54484
11274	Cfa.21367.1.S1_s_at	0.722828	4.47595
30875	CfaAffx.23288.1.S1_s_at	0.722489	9.13556
29981	CfaAffx.22147.1.S1_s_at	0.722447	3.41689
42610	CfaAffx.9542.1.S1_s_at	0.72216	4.01588
18830	Cfa.879.1.S1_at	0.722083	5.35535
42811	CfaAffx.9783.1.S1_at	0.722053	3.31791
41418	CfaAffx.809.1.S1_at	0.722015	3.87675
12771	Cfa.3375.1.S1_s_at	0.721726	6.95902
11999	Cfa.2628.1.A1_s_at	0.721602	6.64301
695	Cfa.10558.1.S1_at	0.721209	8.40411
12973	Cfa.3565.1.S1_s_at	0.72117	9.09371
403	Cfa.10297.1.A1_s_at	0.720776	5.62836
21377	CfaAffx.11672.1.S1_at	0.720151	4.59745
8675	Cfa.18525.1.S1_s_at	0.720073	7.25612
24030	CfaAffx.14889.1.S1_at	0.719934	4.97291
27230	CfaAffx.1878.1.S1_at	0.719682	5.76878
32577	CfaAffx.25383.1.S1_s_at	0.719414	6.8036
40527	CfaAffx.6995.1.S1_s_at	0.719234	6.23121
26990	CfaAffx.18502.1.S1_at	0.71901	7.60592
17282	Cfa.7497.1.A1_at	0.718899	6.6685
7546	Cfa.17235.1.S1_at	0.718417	6.36923
9987	Cfa.19933.1.A1_s_at	0.717788	4.21334
31532	CfaAffx.2413.1.S1_at	0.717597	4.50988
41028	CfaAffx.7618.1.S1_at	0.717369	3.23996
33117	CfaAffx.26040.1.S1_at	0.717189	7.18431
10352	Cfa.20287.1.S1_s_at	0.717182	4.30261
36960	CfaAffx.30840.1.S1_at	0.717115	6.55821
37141	CfaAffx.31050.1.S1_s_at	0.717067	7.33542
38199	CfaAffx.408.1.S1_s_at	0.716794	6.05429
39707	CfaAffx.6008.1.S1_at	0.716481	3.17424
701	Cfa.10560.1.A1_s_at	0.715964	10.2769
7611	Cfa.17311.1.S1_s_at	0.715896	3.60205
24995	CfaAffx.16052.1.S1_at	0.715413	2.96684
11173	Cfa.21259.1.S1_s_at	0.715353	3.3775
11835	Cfa.248.1.S1_at	0.715328	8.23509
36310	CfaAffx.29988.1.S1_at	0.714822	3.48651
31596	CfaAffx.24207.1.S1_s_at	0.714724	9.94337
38620	CfaAffx.4597.1.S1_at	0.713834	2.92943
1177	Cfa.10974.1.S1_at	0.713106	9.18679
37161	CfaAffx.31069.1.S1_s_at	0.713069	8.43389
40346	CfaAffx.6790.1.S1_at	0.71279	5.17412
10025	Cfa.1997.1.S1_at	0.712462	9.11258
13765	Cfa.4407.1.A1_at	0.712291	4.86571
7815	Cfa.17601.1.S1_at	0.712271	3.77366
15954	Cfa.6350.1.A1_at	0.712232	8.90185
41531	CfaAffx.8236.1.S1_s_at	0.712121	5.71975
38084	CfaAffx.3946.1.S1_at	0.711922	4.50037
12739	Cfa.3337.1.A1_at	0.71173	9.8911
5503	Cfa.14883.1.A1_at	0.711625	5.77871
40707	CfaAffx.7215.1.S1_at	0.711444	2.88285
5868	Cfa.15191.1.S1_at	0.711166	5.29074
7604	Cfa.17304.1.S1_s_at	0.710946	5.5197
10431	Cfa.2037.1.A1_at	0.710916	6.69536
31570	CfaAffx.2418.1.S1_at	0.710845	5.13838
8854	Cfa.1871.1.S1_at	0.710733	7.83088
10575	Cfa.20602.1.S1_s_at	0.710497	5.42772
1088	Cfa.10894.1.A1_s_at	0.71017	7.55264
37542	CfaAffx.3272.1.S1_at	0.710168	4.51567
14191	Cfa.4767.1.A1_at	0.709969	5.97315
38917	CfaAffx.4965.1.S1_at	0.709948	6.09223
3995	Cfa.13472.1.A1_at	0.709533	3.30561
1006	Cfa.10826.1.A1_s_at	0.709079	5.10562
11324	Cfa.21462.1.S1_s_at	0.70894	7.83122
13394	Cfa.3907.1.S1_s_at	0.708677	4.50897
41098	CfaAffx.7718.1.S1_at	0.707929	4.10349
255	Cfa.10156.1.A1_at	0.707895	5.38004
2890	Cfa.12466.1.A1_at	0.707651	4.59573
28060	CfaAffx.19818.1.S1_at	0.707623	7.13765
6427	Cfa.15703.1.A1_at	0.70735	4.83699
38003	CfaAffx.3845.1.S1_s_at	0.706729	3.96013
30937	CfaAffx.23356.1.S1_s_at	0.706648	4.33235
12293	Cfa.2891.1.A1_at	0.706059	5.79125
38698	CfaAffx.4685.1.S1_s_at	0.705869	7.41429
23872	CfaAffx.14705.1.S1_s_at	0.705179	4.80219
28228	CfaAffx.2002.1.S1_at	0.70514	2.44758
26565	CfaAffx.17981.1.S1_s_at	0.705034	2.7345
2218	Cfa.11912.1.A1_at	0.704654	8.4079
23157	CfaAffx.13789.1.S1_at	0.704479	2.72083
15576	Cfa.6003.1.S1_at	0.704359	8.76114
21206	CfaAffx.11443.1.S1_s_at	0.704312	7.48785
13633	Cfa.4250.1.A1_s_at	0.703885	4.4625
7213	Cfa.1679.1.A1_at	0.703366	2.96872
25532	CfaAffx.16729.1.S1_s_at	0.703266	7.60148
7407	Cfa.17055.1.S1_at	0.703196	6.36815
24617	CfaAffx.15597.1.S1_s_at	0.702735	8.16586
27920	CfaAffx.19639.1.S1_at	0.70263	4.61056
24978	CfaAffx.16032.1.S1_at	0.702598	6.95708
38742	CfaAffx.4735.1.S1_at	0.702557	8.54471
14438	Cfa.4987.1.A1_at	0.702555	8.25136
24438	CfaAffx.15379.1.S1_at	0.70254	5.9752
15568	Cfa.5996.1.S1_s_at	0.702126	9.89203
10433	Cfa.20371.1.S1_s_at	0.702012	6.4144
20351	CfaAffx.10379.1.S1_s_at	0.702011	9.44976
7519	Cfa.17199.1.S1_at	0.701898	5.82035
17956	Cfa.807.1.S1_at	0.701889	5.77696
5028	Cfa.1443.1.S1_s_at	0.701866	4.42572
36340	CfaAffx.30019.1.S1_at	0.701825	5.62956
19641	Cfa.9588.1.A1_at	0.701751	6.34151
29678	CfaAffx.21784.1.S1_at	0.701113	5.40165
36577	CfaAffx.30341.1.S1_s_at	0.700599	4.07478
41013	CfaAffx.7594.1.S1_at	0.700469	6.42762
38956	CfaAffx.5044.1.S1_s_at	0.700466	2.92058
11840	Cfa.2485.1.S1_a_at	0.700164	8.98198
4866	Cfa.14277.1.A1_at	0.70012	5.52258
6873	Cfa.16341.1.S1_s_at	0.700054	4.04592
22099	CfaAffx.12539.1.S1_s_at	0.699987	9.39001
477	Cfa.10365.1.A1_at	0.699975	7.41117
6338	Cfa.15625.1.A1_at	0.699909	5.39715
5982	Cfa.15294.1.A1_at	0.699816	2.68972
40366	CfaAffx.6812.1.S1_at	0.699727	4.53871
3952	Cfa.13429.1.A1_s_at	0.699018	4.6374
42043	CfaAffx.8850.1.S1_s_at	0.698934	10.0655
3344	Cfa.1286.1.A1_at	0.69871	9.90367
31894	CfaAffx.24592.1.S1_at	0.698485	8.75528
25244	CfaAffx.16356.1.S1_s_at	0.698128	10.3547
11241	Cfa.21329.1.S1_x_at	0.697662	2.79601
37590	CfaAffx.3333.1.S1_s_at	0.697512	5.32531
11881	Cfa.252.1.A1_at	0.697084	6.62485
36871	CfaAffx.30715.1.S1_at	0.696897	4.98332
34594	CfaAffx.27878.1.S1_at	0.696868	6.22363
32788	CfaAffx.25637.1.S1_s_at	0.696729	6.22765
11334	Cfa.21474.1.S1_s_at	0.696713	4.44455
9442	Cfa.19403.1.S1_s_at	0.696699	7.69088
39532	CfaAffx.5795.1.S1_at	0.696603	7.66395
1023	Cfa.10841.1.A1_at	0.69657	8.30669
25646	CfaAffx.16862.1.S1_s_at	0.696216	5.13465
35501	CfaAffx.29013.1.S1_at	0.695656	5.22026
22015	CfaAffx.12438.1.S1_at	0.694989	3.06098
13710	Cfa.4343.1.S1_s_at	0.694983	5.93894
11915	Cfa.255.1.S1_s_at	0.694855	8.36242
8161	Cfa.17962.2.S1_a_at	0.694748	3.32983
37723	CfaAffx.3495.1.S1_at	0.694543	7.60642
8105	Cfa.17902.1.S1_s_at	0.694536	4.22196
837	Cfa.10674.1.A1_at	0.694442	5.24113
21728	CfaAffx.12091.1.S1_s_at	0.694348	4.26754
2416	Cfa.12078.1.A1_at	0.694267	4.41244
26246	CfaAffx.17580.1.S1_at	0.694073	4.20315
12185	Cfa.2797.1.A1_at	0.694005	8.66773
31249	CfaAffx.23784.1.S1_s_at	0.693963	3.99888
5814	Cfa.15148.1.A1_at	0.693933	6.23242
14837	Cfa.5340.1.A1_at	0.693831	9.01068
23234	CfaAffx.13891.1.S1_s_at	0.693688	4.38483
1492	Cfa.1128.2.S1_s_at	0.693248	9.20168
8560	Cfa.18403.1.S1_at	0.69301	4.77142
24418	CfaAffx.15349.1.S1_at	0.69271	8.70671
33800	CfaAffx.26887.1.S1_s_at	0.692645	4.14325
34241	CfaAffx.27424.1.S1_at	0.69244	7.32225
15756	Cfa.6182.1.A1_at	0.692365	7.64665
9595	Cfa.19547.1.S1_at	0.692062	6.88487
27292	CfaAffx.18871.1.S1_at	0.692027	6.59153
26288	CfaAffx.17636.1.S1_at	0.692019	6.73678
9262	Cfa.19154.1.S1_at	0.692013	5.19575
26678	CfaAffx.18120.1.S1_at	0.691861	4.17969
27188	CfaAffx.18727.1.S1_s_at	0.691835	2.5293
27500	CfaAffx.19114.1.S1_s_at	0.69167	4.08714
22832	CfaAffx.13370.1.S1_at	0.690711	3.55467
6103	Cfa.1541.1.A1_s_at	0.690704	6.15896
35824	CfaAffx.29384.1.S1_at	0.690703	3.418
32435	CfaAffx.25218.1.S1_x_at	0.690638	9.21167
25621	CfaAffx.16836.1.S1_at	0.69044	4.84415
37331	CfaAffx.31268.1.S1_s_at	0.69034	8.77566
15181	Cfa.564.1.A1_at	0.690338	7.84798
26486	CfaAffx.17877.1.S1_s_at	0.690122	3.93709
11254	Cfa.21347.1.S1_at	0.689943	3.14514
19672	Cfa.9623.1.S1_at	0.689777	6.11807
10822	Cfa.20892.1.S1_s_at	0.689719	5.13816
12630	Cfa.322.1.S1_s_at	0.689559	6.21395
21746	CfaAffx.12115.1.S1_s_at	0.689495	4.69751
31052	CfaAffx.23526.1.S1_s_at	0.688518	4.68398
13516	Cfa.4058.1.S1_s_at	0.688293	5.05426
11264	Cfa.21354.1.S1_s_at	0.688192	4.09214
17830	Cfa.7970.1.A1_at	0.687797	3.98834
25509	CfaAffx.16707.1.S1_at	0.687444	6.66902
27094	CfaAffx.18629.1.S1_s_at	0.687379	5.01217
15052	Cfa.5525.1.A1_at	0.687256	9.84292
31966	CfaAffx.2469.1.S1_at	0.6868	4.11664
38464	CfaAffx.4397.1.S1_x_at	0.6868	2.51177
38496	CfaAffx.4436.1.S1_at	0.686725	4.46175
42442	CfaAffx.9314.1.S1_s_at	0.686683	3.3066
31398	CfaAffx.23969.1.S1_s_at	0.686523	3.62216
2662	Cfa.12279.1.A1_at	0.686478	5.92323
10098	Cfa.20038.1.S1_s_at	0.686336	8.19947
23691	CfaAffx.14479.1.S1_s_at	0.68607	4.08096
6104	Cfa.15410.1.A1_s_at	0.685804	9.3747
30941	CfaAffx.23372.1.S1_at	0.685608	6.69486
37794	CfaAffx.3587.1.S1_at	0.685605	2.56104
8714	Cfa.18573.1.S1_at	0.685485	5.2617
22027	CfaAffx.12450.1.S1_at	0.685457	3.30198
33200	CfaAffx.26147.1.S1_s_at	0.685432	5.74072
40840	CfaAffx.739.1.S1_s_at	0.685008	7.25937
41663	CfaAffx.8399.1.S1_s_at	0.684202	7.13479
2584	Cfa.12215.1.A1_at	0.683892	12.9109
41026	CfaAffx.7616.1.S1_s_at	0.683806	5.74748
25862	CfaAffx.17121.1.S1_at	0.683453	6.58322
24997	CfaAffx.16056.1.S1_s_at	0.682878	3.29582
3121	Cfa.12661.1.A1_at	0.682864	6.37559
39533	CfaAffx.5797.1.S1_at	0.682654	5.58657
34008	CfaAffx.27136.1.S1_at	0.682599	4.04608
21601	CfaAffx.11943.1.S1_at	0.682545	6.88926
13439	Cfa.3957.1.A1_at	0.68241	4.33863
37579	CfaAffx.3318.1.S1_x_at	0.682375	9.79273
37939	CfaAffx.3768.1.S1_s_at	0.682318	5.59361
22623	CfaAffx.13139.1.S1_s_at	0.682281	6.91319
35444	CfaAffx.28945.1.S1_s_at	0.682235	5.58096
32813	CfaAffx.25668.1.S1_s_at	0.682048	5.54546
8163	Cfa.17965.1.S1_s_at	0.681895	9.28654
16576	Cfa.6889.1.A1_at	0.681677	6.4333
15351	Cfa.5800.1.A1_at	0.681375	2.81162
39802	CfaAffx.6146.1.S1_s_at	0.681335	6.12044
39521	CfaAffx.5780.1.S1_s_at	0.680564	6.87289
22273	CfaAffx.12753.1.S1_at	0.680462	4.26404
39309	CfaAffx.5518.1.S1_at	0.680458	4.96852
27837	CfaAffx.19542.1.S1_at	0.68013	6.49767
24124	CfaAffx.14994.1.S1_at	0.679901	5.06594
21847	CfaAffx.12235.1.S1_at	0.679763	3.52009
37670	CfaAffx.3431.1.S1_s_at	0.679729	4.18211
23730	CfaAffx.14531.1.S1_s_at	0.679667	5.23456
24181	CfaAffx.15065.1.S1_s_at	0.679658	5.5477
4883	Cfa.14295.2.A1_x_at	0.679613	3.90724
25308	CfaAffx.16440.1.S1_at	0.679587	5.47435
28768	CfaAffx.20668.1.S1_x_at	0.67891	5.74427
15949	Cfa.6348.1.A1_at	0.678872	7.40297
37026	CfaAffx.30912.1.S1_at	0.678526	7.38083
8342	Cfa.18168.1.S1_s_at	0.678375	4.98057
36993	CfaAffx.30878.1.S1_at	0.678372	3.543
42268	CfaAffx.9117.1.S1_at	0.678295	5.19323
12169	Cfa.278.2.S1_a_at	0.678287	11.8332
41932	CfaAffx.8717.1.S1_s_at	0.6782	5.4697
24363	CfaAffx.15287.1.S1_s_at	0.677951	4.32182
6426	Cfa.15702.1.S1_at	0.677834	9.39461
7734	Cfa.17452.1.S1_at	0.677446	7.3168
33756	CfaAffx.26824.1.S1_s_at	0.677321	5.95299
1270	Cfa.11070.1.A1_at	0.677152	5.03927
6766	Cfa.16228.1.S1_s_at	0.677015	6.08751
8852	Cfa.18708.1.S1_s_at	0.676866	10.358
9484	Cfa.19445.1.S1_at	0.67686	6.13808
33920	CfaAffx.27027.1.S1_s_at	0.676766	7.18634
16691	Cfa.6982.1.A1_at	0.676531	3.27627
2463	Cfa.12112.1.S1_at	0.67637	7.08957
32583	CfaAffx.25390.1.S1_at	0.676172	3.46148
11888	Cfa.2526.1.A1_at	0.676127	8.1664
6390	Cfa.15672.1.A1_at	0.67607	6.59602
21494	CfaAffx.11827.1.S1_at	0.67605	5.68555
17903	Cfa.8028.1.S1_s_at	0.675439	10.282
10044	Cfa.19985.1.S1_s_at	0.675331	8.72045
10687	Cfa.20749.1.S1_s_at	0.675182	8.90846
19984	Cfa.9951.1.A1_at	0.674926	9.02962
20285	CfaAffx.10301.1.S1_at	0.674906	3.99952
31725	CfaAffx.24373.1.S1_at	0.674855	2.52325
27547	CfaAffx.19174.1.S1_at	0.674084	7.45285
35563	CfaAffx.2909.1.S1_at	0.674058	6.43484
4216	Cfa.13673.1.A1_at	0.674055	8.7239
10596	Cfa.20636.1.S1_at	0.673915	6.97395
7841	Cfa.17626.1.S1_s_at	0.673858	7.87207
41639	CfaAffx.8368.1.S1_at	0.673854	5.4491
24893	CfaAffx.15934.1.S1_at	0.673678	3.4195
18765	Cfa.8740.1.A1_at	0.673568	4.91705
29696	CfaAffx.21803.1.S1_at	0.673293	4.08938
12982	Cfa.3572.1.S1_s_at	0.673013	6.5045
8349	Cfa.18175.1.S1_at	0.672964	7.86342
42875	CfaAffx.9876.1.S1_at	0.672737	3.01201
525	Cfa.10410.1.A1_at	0.672215	7.11824
680	Cfa.10542.1.S1_at	0.672068	4.63989
29142	CfaAffx.2110.1.S1_s_at	0.671894	8.25039
19511	Cfa.9457.1.A1_at	0.671247	6.78468
34134	CfaAffx.27301.1.S1_s_at	0.670976	9.04464
29751	CfaAffx.21868.1.S1_at	0.67089	5.35124
15724	Cfa.615.1.S1_at	0.670882	5.38629
10122	Cfa.20061.1.S1_s_at	0.670265	4.08759
39316	CfaAffx.5523.1.S1_s_at	0.670125	3.89534
6035	Cfa.15347.1.A1_x_at	0.670057	4.56901
41177	CfaAffx.7822.1.S1_at	0.669858	4.24998
10050	Cfa.19990.1.S1_s_at	0.669542	6.32852
17046	Cfa.7294.1.A1_at	0.669067	4.6366
28737	CfaAffx.20630.1.S1_s_at	0.668841	9.40108
10054	Cfa.19994.1.S1_s_at	0.668372	7.21639
33755	CfaAffx.26823.1.S1_at	0.668254	4.7336
9830	Cfa.19771.1.S1_s_at	0.668076	7.71392
1339	Cfa.11133.1.A1_at	0.6679	8.04036
3008	Cfa.1257.1.A2_at	0.667603	10.5938
41980	CfaAffx.8775.1.S1_at	0.667061	3.01243
40155	CfaAffx.6568.1.S1_s_at	0.667037	5.00793
11006	Cfa.21060.1.S1_at	0.666877	5.74979
16022	Cfa.6408.1.S1_s_at	0.666759	5.58621
25445	CfaAffx.16624.1.S1_s_at	0.666398	11.4211
7600	Cfa.17300.1.S1_s_at	0.666149	5.03627
29966	CfaAffx.22124.1.S1_at	0.665929	5.42658
42806	CfaAffx.9773.1.S1_s_at	0.665669	6.50658
16591	Cfa.690.1.A1_at	0.665613	7.23004
12115	Cfa.2730.1.S1_at	0.665559	7.74422
22170	CfaAffx.12624.1.S1_s_at	0.665547	4.26891
37771	CfaAffx.3554.1.S1_s_at	0.664935	8.76397
12672	Cfa.3265.1.A1_at	0.664934	5.76764
27167	CfaAffx.18703.1.S1_s_at	0.664848	5.02876
37605	CfaAffx.3351.1.S1_s_at	0.664729	3.46082
14578	Cfa.5113.1.A1_at	0.664515	5.25941
10826	Cfa.20896.1.S1_s_at	0.66449	6.78402
41878	CfaAffx.8658.1.S1_s_at	0.664481	8.52109
10180	Cfa.20119.1.S1_s_at	0.664461	4.46971
38357	CfaAffx.4267.1.S1_s_at	0.664406	5.40957
8444	Cfa.18273.1.S1_s_at	0.663759	5.20637
11782	Cfa.2427.1.A1_at	0.663397	9.45376
26130	CfaAffx.17438.1.S1_at	0.663379	5.51177
1637	Cfa.11403.1.A1_at	0.663361	10.6085
21089	CfaAffx.11273.1.S1_s_at	0.663342	7.64148
2808	Cfa.12398.1.A1_at	0.663216	8.10954
13527	Cfa.408.1.A1_at	0.662995	7.33367
31477	CfaAffx.24054.1.S1_s_at	0.662739	6.07413
12170	Cfa.278.2.S1_s_at	0.662427	9.45062
1009	Cfa.10829.1.A1_at	0.66217	8.57261
10647	Cfa.20705.1.S1_s_at	0.661799	5.41807
42213	CfaAffx.9044.1.S1_s_at	0.661633	7.31386
23983	CfaAffx.14835.1.S1_at	0.661577	7.31736
6440	Cfa.15716.1.A1_at	0.661525	4.0025
3163	Cfa.12698.1.A1_s_at	0.661358	8.62168
19785	Cfa.9741.2.A1_at	0.661177	5.07768
26170	CfaAffx.17481.1.S1_at	0.661154	6.34653
22572	CfaAffx.13079.1.S1_s_at	0.661007	7.87659
39284	CfaAffx.5487.1.S1_s_at	0.66019	8.85743
23027	CfaAffx.13608.1.S1_s_at	0.659992	7.00683
482	Cfa.10371.1.A1_at	0.659927	10.2271
9183	Cfa.19079.1.S1_s_at	0.659273	2.58173
7437	Cfa.17102.1.S1_at	0.659132	4.40993
24704	CfaAffx.15697.1.S1_at	0.659088	9.00581
1528	Cfa.11307.1.A1_s_at	0.658893	6.39185
9070	Cfa.18946.1.S1_s_at	0.658867	10.4799
1426	Cfa.11219.1.A1_at	0.658702	6.0102
37646	CfaAffx.3399.1.S1_at	0.658655	3.70834
20512	CfaAffx.10576.1.S1_s_at	0.658104	7.55777
698	Cfa.10558.3.A1_at	0.658059	3.75066
23605	CfaAffx.14363.1.S1_at	0.657998	6.05807
12204	Cfa.2812.1.S1_s_at	0.657966	7.52345
23187	CfaAffx.1383.1.S1_at	0.657919	3.23972
38167	CfaAffx.4047.1.S1_at	0.657816	7.02706
2831	Cfa.12414.1.A1_at	0.657706	7.6156
2527	Cfa.12179.1.A1_at	0.657469	9.31261
9427	Cfa.19390.1.S1_s_at	0.657431	6.94826
469	Cfa.10357.1.A1_at	0.657429	4.36224
33474	CfaAffx.26479.1.S1_x_at	0.65737	9.15932
12647	Cfa.3241.1.S1_x_at	0.65726	8.5102
34333	CfaAffx.27543.1.S1_at	0.656779	6.27775
39448	CfaAffx.5689.1.S1_at	0.656637	8.40596
38928	CfaAffx.4990.1.S1_at	0.656592	4.74182
26355	CfaAffx.17707.1.S1_s_at	0.656585	7.50737
8879	Cfa.18733.1.S1_s_at	0.65623	9.0386
943	Cfa.10770.1.S1_s_at	0.655961	11.4541
17377	Cfa.7574.1.A1_s_at	0.655835	5.33926
41178	CfaAffx.7822.1.S1_s_at	0.655808	3.64896
22329	CfaAffx.12812.1.S1_at	0.655561	5.00672
34595	CfaAffx.27878.1.S1_s_at	0.655519	5.19889
10166	Cfa.20105.1.S1_s_at	0.655387	6.2126
34185	CfaAffx.27357.1.S1_at	0.655372	6.55869
37499	CfaAffx.3221.1.S1_at	0.65526	4.05904
6146	Cfa.15451.1.A1_at	0.655215	5.76175
21072	CfaAffx.1126.1.S1_s_at	0.655052	3.14089
19801	Cfa.9759.1.A1_at	0.654909	6.12516
8532	Cfa.18370.1.S1_s_at	0.654876	4.36652
15409	Cfa.5851.1.A1_a_at	0.653577	2.73161
31457	CfaAffx.24036.1.S1_at	0.653463	4.35512
9859	Cfa.19799.1.S1_at	0.653405	7.62965
9218	Cfa.19120.1.S1_at	0.652644	6.44756
20764	CfaAffx.109.1.S1_s_at	0.652618	10.9126
26508	CfaAffx.17910.1.S1_s_at	0.652475	4.8092
1535	Cfa.11314.1.A1_at	0.652444	5.82567
32924	CfaAffx.25792.1.S1_at	0.65239	3.47439
34085	CfaAffx.27245.1.S1_s_at	0.652084	4.9378
19284	Cfa.9236.1.A1_at	0.651692	6.99121
24587	CfaAffx.1556.1.S1_at	0.651616	2.72819
19096	Cfa.9048.1.A1_at	0.651453	5.67814
9985	Cfa.1993.1.S1_at	0.651379	3.15009
6684	Cfa.16089.1.S1_s_at	0.651217	6.22079
4328	Cfa.13776.1.A1_at	0.651168	5.36196
2750	Cfa.12357.1.A1_at	0.650587	6.83051
7878	Cfa.17673.1.S1_s_at	0.650495	5.95501
1859	Cfa.11605.1.A1_at	0.650493	8.21292
4942	Cfa.14349.1.A1_at	0.650353	9.38441
13353	Cfa.3875.1.A1_at	0.650262	11.1613
12646	Cfa.3241.1.S1_at	0.650089	8.41335
7642	Cfa.17346.1.S1_s_at	0.649753	5.14447
35663	CfaAffx.29211.1.S1_at	0.649719	2.5999
7461	Cfa.17130.1.S1_s_at	0.64958	7.68041
12577	Cfa.3168.1.A1_at	0.649415	10.555
8085	Cfa.17884.1.S1_at	0.649183	8.10398
29991	CfaAffx.22163.1.S1_at	0.64869	2.48739
2729	Cfa.12340.1.A1_s_at	0.648618	7.15453
28854	CfaAffx.20761.1.S1_at	0.648216	6.33861
42372	CfaAffx.9248.1.S1_at	0.648131	4.25978
27995	CfaAffx.19734.1.S1_at	0.648082	5.14234
15822	Cfa.6235.1.A1_s_at	0.64799	7.71402
18775	Cfa.8748.1.A1_s_at	0.647946	7.57575
38116	CfaAffx.3985.1.S1_s_at	0.647911	5.93678
21226	CfaAffx.11466.1.S1_at	0.647434	5.96662
29476	CfaAffx.21539.1.S1_at	0.647324	8.10738
36605	CfaAffx.30386.1.S1_at	0.647186	5.1501
8951	Cfa.1881.1.A1_at	0.647029	4.30329
14838	Cfa.5340.1.A1_s_at	0.646893	9.98248
5917	Cfa.15233.1.A1_at	0.646864	5.07286
28931	CfaAffx.20837.1.S1_at	0.646718	6.10483
33642	CfaAffx.26676.1.S1_s_at	0.646544	7.22899
26285	CfaAffx.17632.1.S1_at	0.646264	7.44219
35845	CfaAffx.29414.1.S1_at	0.64621	5.91123
37164	CfaAffx.31073.1.S1_at	0.645979	4.82407
34651	CfaAffx.27937.1.S1_at	0.645876	5.72659
5565	Cfa.14930.1.S1_at	0.645615	7.30975
3568	Cfa.13075.1.A1_s_at	0.645481	5.52247
8668	Cfa.1852.1.A1_at	0.645169	7.69479
24564	CfaAffx.15531.1.S1_at	0.644816	9.06812
39970	CfaAffx.6341.1.S1_at	0.644816	3.9975
2818	Cfa.12403.1.A1_at	0.644814	6.42515
35304	CfaAffx.28750.1.S1_s_at	0.644679	6.94863
13586	Cfa.4159.1.A1_at	0.644592	11.6742
28899	CfaAffx.20800.1.S1_s_at	0.644549	6.92327
36183	CfaAffx.29828.1.S1_s_at	0.64439	5.84928
2074	Cfa.11793.1.A1_at	0.644153	6.21229
37879	CfaAffx.3691.1.S1_s_at	0.643688	10.8513
22152	CfaAffx.12605.1.S1_s_at	0.643661	4.89602
7601	Cfa.17302.1.S1_s_at	0.643563	3.16701
241	Cfa.10140.1.S1_s_at	0.643423	8.11127
38838	CfaAffx.4867.1.S1_s_at	0.643371	8.20932
16537	Cfa.6855.1.A1_at	0.643078	4.52974
19049	Cfa.9000.1.A1_at	0.643014	3.37724
41695	CfaAffx.8435.1.S1_at	0.642651	5.67714
7766	Cfa.17546.1.S1_s_at	0.642638	6.35545
16070	Cfa.6454.1.A1_at	0.642606	5.21602
40501	CfaAffx.6968.1.S1_at	0.642296	6.76201
38883	CfaAffx.4911.1.S1_s_at	0.642253	5.25474
35075	CfaAffx.2846.1.S1_s_at	0.642193	3.1388
24843	CfaAffx.15873.1.S1_s_at	0.642062	9.92214
11140	Cfa.21205.1.S1_s_at	0.64201	5.38972
36029	CfaAffx.29651.1.S1_at	0.641837	4.85033
39697	CfaAffx.5997.1.S1_at	0.641435	7.39371
24682	CfaAffx.15669.1.S1_at	0.641427	3.57653
42154	CfaAffx.8975.1.S1_s_at	0.641272	6.68393
14198	Cfa.4771.2.A1_s_at	0.641153	3.74772
27714	CfaAffx.19379.1.S1_s_at	0.641131	4.57316
31808	CfaAffx.2447.1.S1_s_at	0.640964	11.0558
15920	Cfa.6325.1.S1_a_at	0.640934	8.73892
17961	Cfa.8071.2.S1_s_at	0.64088	7.87523
38402	CfaAffx.4317.1.S1_s_at	0.640845	7.63962
33610	CfaAffx.26640.1.S1_s_at	0.640457	6.7086
31617	CfaAffx.24228.1.S1_at	0.640096	5.02075
19456	Cfa.9404.1.A1_at	0.639985	3.21209
10446	Cfa.20385.1.S1_s_at	0.639864	6.94059
9137	Cfa.19017.1.S1_at	0.639699	3.12794
15764	Cfa.6190.1.S1_s_at	0.639695	8.9569
23519	CfaAffx.14245.1.S1_at	0.639605	5.64979
41574	CfaAffx.8283.1.S1_s_at	0.639553	3.95385
35287	CfaAffx.28730.1.S1_at	0.639479	5.60115
25297	CfaAffx.16428.1.S1_s_at	0.639394	7.2325
20698	CfaAffx.10831.1.S1_at	0.639241	8.18903
28502	CfaAffx.20340.1.S1_at	0.638721	5.77798
7495	Cfa.17171.1.S1_at	0.638581	8.2251
36540	CfaAffx.30291.1.S1_at	0.638534	7.8143
1733	Cfa.11488.1.A1_at	0.638345	9.81565
5831	Cfa.15160.1.A1_at	0.638111	5.3027
4579	Cfa.14018.1.A1_at	0.638098	2.70142
12741	Cfa.3338.1.A1_s_at	0.637967	8.96963
36729	CfaAffx.30543.1.S1_s_at	0.637855	5.90584
2190	Cfa.11890.1.A1_at	0.637522	4.57802
7884	Cfa.17680.1.S1_s_at	0.637273	2.7603
13801	Cfa.4451.1.S1_at	0.637227	5.95607
8922	Cfa.18779.1.S1_s_at	0.636965	4.41237
39799	CfaAffx.6143.1.S1_at	0.636833	5.88446
31048	CfaAffx.23522.1.S1_at	0.636812	4.41786
36515	CfaAffx.3026.1.S1_s_at	0.636647	8.43457
8692	Cfa.18547.1.S1_at	0.636636	8.95171
14253	Cfa.4819.1.A1_at	0.636609	7.8977
10755	Cfa.20823.1.S1_s_at	0.636513	9.48097
23380	CfaAffx.1407.1.S1_s_at	0.636384	4.17062
34862	CfaAffx.28176.1.S1_at	0.636286	4.08964
12354	Cfa.2953.1.A1_at	0.636238	7.432
38311	CfaAffx.4204.1.S1_at	0.636066	4.72249
42660	CfaAffx.9592.1.S1_s_at	0.63582	3.2632
18400	Cfa.8442.1.A1_s_at	0.635798	5.60254
31055	CfaAffx.2353.1.S1_at	0.635555	3.38221
16728	Cfa.7011.1.A1_at	0.63545	6.15575
17920	Cfa.8040.1.S1_at	0.635449	7.39725
26007	CfaAffx.17297.1.S1_s_at	0.63513	11.2491
1964	Cfa.11698.1.A1_at	0.635069	5.8286
41237	CfaAffx.7893.1.S1_s_at	0.635005	3.17839
19740	Cfa.9689.1.S1_at	0.634723	6.41705
4869	Cfa.1428.1.A1_at	0.634525	7.41105
17060	Cfa.7305.1.A1_s_at	0.634355	7.61401
28280	CfaAffx.2008.1.S1_at	0.634256	5.86597
25449	CfaAffx.16629.1.S1_s_at	0.634184	4.44
33886	CfaAffx.2699.1.S1_at	0.634135	5.48124
11346	Cfa.2149.1.A1_at	0.633758	8.29838
38375	CfaAffx.4285.1.S1_s_at	0.633722	6.67578
7975	Cfa.17778.1.S1_s_at	0.633557	5.10719
24792	CfaAffx.15808.1.S1_s_at	0.63349	10.8404
37240	CfaAffx.31176.1.S1_s_at	0.633447	6.81485
2462	Cfa.12111.1.A1_at	0.633426	7.18121
5759	Cfa.15096.1.S1_s_at	0.633397	9.77412
21073	CfaAffx.11260.1.S1_s_at	0.633299	8.73281
34215	CfaAffx.2739.1.S1_s_at	0.632876	3.31756
5533	Cfa.14901.1.A1_at	0.632679	3.29972
10679	Cfa.20738.1.S1_s_at	0.632151	4.08262
15278	Cfa.5733.1.A1_at	0.631997	3.13781
18559	Cfa.8573.1.S1_at	0.631993	3.57664
33699	CfaAffx.26743.1.S1_at	0.631729	4.03217
28739	CfaAffx.20634.1.S1_at	0.631722	4.80003
6314	Cfa.15602.1.A1_at	0.631464	4.18862
12940	Cfa.3541.1.A1_at	0.631153	5.51445
27536	CfaAffx.1916.1.S1_at	0.631132	9.27046
3787	Cfa.13282.1.S1_s_at	0.631094	8.7636
4678	Cfa.14101.1.A1_at	0.630937	4.3969
10228	Cfa.20162.1.S1_s_at	0.63088	9.95505
5621	Cfa.14981.1.S1_s_at	0.63077	2.60366
35114	CfaAffx.28514.1.S1_at	0.63055	4.23363
40220	CfaAffx.6650.1.S1_at	0.630504	4.41915
2147	Cfa.11853.1.A1_at	0.630457	3.98979
40076	CfaAffx.6465.1.S1_s_at	0.629641	8.18709
18211	Cfa.8295.1.S1_at	0.629494	5.49967
8570	Cfa.18415.1.S1_at	0.628962	3.07815
11331	Cfa.21470.1.S1_s_at	0.628714	5.13694
30938	CfaAffx.23366.1.S1_s_at	0.628632	8.31301
6803	Cfa.16262.1.S1_at	0.628613	6.37812
36081	CfaAffx.29707.1.S1_s_at	0.62832	4.40364
13071	Cfa.365.1.S1_a_at	0.62815	8.07497
12737	Cfa.3335.1.A1_at	0.627983	7.38792
4158	Cfa.13620.2.A1_s_at	0.627921	8.25498
12609	Cfa.32.1.S1_s_at	0.62766	9.78197
42774	CfaAffx.9737.1.S1_at	0.627603	2.88617
23177	CfaAffx.1381.1.S1_s_at	0.627289	10.0582
42294	CfaAffx.9158.1.S1_s_at	0.626798	3.94625
13709	Cfa.4343.1.S1_at	0.626781	7.66883
37578	CfaAffx.3318.1.S1_at	0.626708	9.89844
16391	Cfa.6733.1.A1_at	0.626312	3.73374
20143	CfaAffx.10140.1.S1_at	0.626167	4.39345
14249	Cfa.4815.1.A1_at	0.625897	3.59008
26936	CfaAffx.18440.1.S1_at	0.625833	6.04812
13635	Cfa.4255.1.S1_at	0.625735	6.87507
22336	CfaAffx.12818.1.S1_s_at	0.625712	2.7995
29752	CfaAffx.21869.1.S1_at	0.625673	10.1632
23386	CfaAffx.1408.1.S1_at	0.625622	5.95506
2752	Cfa.12359.1.A1_at	0.62558	9.28559
26362	CfaAffx.17717.1.S1_at	0.62549	4.8845
16620	Cfa.6923.1.A1_at	0.625329	7.13004
37309	CfaAffx.31247.1.S1_at	0.625112	5.9329
1811	Cfa.11562.1.A1_at	0.625019	5.98398
37170	CfaAffx.31082.1.S1_s_at	0.624868	4.18202
11194	Cfa.21285.1.S1_at	0.624778	6.3368
2977	Cfa.12542.1.A1_at	0.624744	5.41747
6587	Cfa.1590.1.A1_at	0.624603	8.39158
7199	Cfa.16777.1.S1_s_at	0.624577	8.57235
34945	CfaAffx.28282.1.S1_at	0.6245	4.55424
24938	CfaAffx.15995.1.S1_at	0.624283	2.45218
35414	CfaAffx.28895.1.S1_s_at	0.624197	4.20573
20628	CfaAffx.10735.1.S1_at	0.624019	5.57919
11301	Cfa.21392.1.S1_at	0.62378	8.9082
14415	Cfa.4965.1.A1_at	0.623318	6.04791
10785	Cfa.20853.2.S1_at	0.622878	3.48393
14073	Cfa.4664.1.A1_at	0.622849	6.75792
6857	Cfa.16328.1.A1_at	0.622843	2.54662
18163	Cfa.8255.1.A1_at	0.622832	5.48287
6719	Cfa.16156.1.S1_at	0.622655	4.20539
11343	Cfa.21487.1.S1_s_at	0.622549	7.42572
35895	CfaAffx.2949.1.S1_at	0.622369	3.35598
25948	CfaAffx.17227.1.S1_s_at	0.621795	5.71434
23694	CfaAffx.14483.1.S1_s_at	0.621749	3.38761
12038	Cfa.2666.1.S1_at	0.621618	4.23211
40075	CfaAffx.6465.1.S1_at	0.621289	5.89141
2819	Cfa.12403.2.S1_at	0.621094	7.44322
493	Cfa.10379.1.A1_at	0.621089	10.3495
21880	CfaAffx.12272.1.S1_s_at	0.621024	4.58797
17266	Cfa.7483.1.A1_at	0.620644	5.83127
36663	CfaAffx.30459.1.S1_at	0.62062	3.42521
10876	Cfa.20940.1.S1_s_at	0.620618	7.74165
36298	CfaAffx.29976.1.S1_s_at	0.620397	5.15354
3414	Cfa.1292.1.S1_at	0.620203	7.73959
42444	CfaAffx.9317.1.S1_at	0.619553	2.44415
16310	Cfa.6665.1.A1_s_at	0.61938	7.71564
12292	Cfa.2890.1.S1_at	0.619133	6.75767
4429	Cfa.13873.1.S1_at	0.619104	5.15366
18976	Cfa.8924.1.A1_at	0.619086	7.8599
8129	Cfa.17930.1.S1_at	0.618793	6.54606
24828	CfaAffx.15855.1.S1_at	0.618789	6.63376
3113	Cfa.12653.3.A1_at	0.618428	4.44209
23682	CfaAffx.14465.1.S1_s_at	0.61831	5.70069
27251	CfaAffx.18814.1.S1_at	0.618093	3.26156
31237	CfaAffx.2377.1.S1_s_at	0.617977	3.20779
29018	CfaAffx.20951.1.S1_at	0.617771	3.21342
2053	Cfa.11775.1.A1_at	0.617754	6.49837
39470	CfaAffx.5713.1.S1_at	0.617751	3.69734
42531	CfaAffx.944.1.S1_at	0.617718	4.4102
22789	CfaAffx.13318.1.S1_s_at	0.617434	8.21839
23733	CfaAffx.14534.1.S1_s_at	0.617383	3.68455
5774	Cfa.15110.1.A1_at	0.616552	3.46079
19339	Cfa.9295.1.S1_at	0.616457	11.2093
37376	CfaAffx.3164.1.S1_s_at	0.616456	8.12751
5409	Cfa.14791.1.A1_s_at	0.616309	3.73732
17948	Cfa.8063.1.A1_at	0.616051	3.15763
22496	CfaAffx.13003.1.S1_at	0.615978	2.72112
29238	CfaAffx.21220.1.S1_at	0.615976	6.0604
29014	CfaAffx.20946.1.S1_s_at	0.615511	3.75076
8417	Cfa.1824.1.S1_at	0.61524	12.3133
20713	CfaAffx.10847.1.S1_at	0.615111	7.15851
12526	Cfa.3119.1.A1_at	0.614927	5.61641
29365	CfaAffx.21388.1.S1_s_at	0.614674	4.53146
1416	Cfa.1121.1.S1_at	0.614662	5.86108
35115	CfaAffx.28517.1.S1_at	0.614518	7.30473
25907	CfaAffx.17173.1.S1_at	0.614516	4.21829
6896	Cfa.16362.1.S1_s_at	0.61436	6.40397
5810	Cfa.15142.1.A1_at	0.614307	8.79095
20040	CfaAffx.10013.1.S1_s_at	0.614227	9.30808
28217	CfaAffx.20009.1.S1_at	0.614225	6.05748
11843	Cfa.2487.1.S1_at	0.614068	6.45801
18031	Cfa.8132.1.A1_at	0.612927	7.61035
1668	Cfa.11429.1.A1_at	0.612839	5.94285
6559	Cfa.15826.1.S1_s_at	0.61269	8.57339
8642	Cfa.18491.1.S1_s_at	0.612687	7.95629
31335	CfaAffx.23897.1.S1_at	0.61264	5.30071
41497	CfaAffx.8194.1.S1_at	0.612607	7.2474
1508	Cfa.11290.1.A1_s_at	0.612492	5.98915
25089	CfaAffx.16175.1.S1_s_at	0.612463	7.56092
4896	Cfa.14307.1.A1_s_at	0.612355	4.40423
11305	Cfa.21398.1.S1_s_at	0.612171	5.54958
7269	Cfa.1687.1.A1_at	0.612036	8.2671
25188	CfaAffx.1629.1.S1_s_at	0.612018	6.93595
22836	CfaAffx.13376.1.S1_at	0.611611	2.80003
4768	Cfa.14188.1.A1_a_at	0.61161	7.90624
8821	Cfa.1868.1.S1_at	0.611561	4.80112
4027	Cfa.13501.1.S1_at	0.611496	5.89817
41009	CfaAffx.759.1.S1_s_at	0.611182	3.12179
19665	Cfa.9613.1.A1_at	0.61067	6.76982
31278	CfaAffx.2382.1.S1_s_at	0.610337	3.5297
33637	CfaAffx.26669.1.S1_at	0.610322	4.0226
7477	Cfa.17148.1.S1_s_at	0.610268	9.82226
18258	Cfa.8331.2.S1_at	0.610252	2.67755
10415	Cfa.20348.1.S1_at	0.610222	6.6714
3705	Cfa.13200.1.A1_at	0.609978	5.14123
25498	CfaAffx.16694.1.S1_at	0.609854	6.13288
10085	Cfa.20022.1.S1_s_at	0.609787	3.50678
37065	CfaAffx.30958.1.S1_s_at	0.609765	9.79713
515	Cfa.1040.1.A1_at	0.609734	8.0205
18702	Cfa.8688.1.A1_s_at	0.609656	8.78911
27407	CfaAffx.19014.1.S1_at	0.609642	5.45339
[truncated: 41,036 more rows]

## Sheet: Contrast5 (e)
	ID	M	A
24163	CfaAffx.15042.1.S1_s_at	7.24438	6.42364
38124	CfaAffx.3994.1.S1_s_at	6.97249	8.63118
38135	CfaAffx.4011.1.S1_at	6.04171	7.18665
19289	Cfa.9240.1.S1_at	5.27638	5.12581
23153	CfaAffx.13785.1.S1_s_at	4.86358	7.75869
23152	CfaAffx.13785.1.S1_at	4.73989	8.82346
13686	Cfa.432.1.A1_at	4.40788	6.49706
16800	Cfa.7074.1.A1_at	4.36987	8.05074
33127	CfaAffx.26061.1.S1_at	4.30619	7.7169
16030	Cfa.6413.1.A1_at	4.27727	6.64866
40963	CfaAffx.7537.1.S1_at	4.16394	6.17029
2654	Cfa.12271.1.A1_at	3.59494	6.58013
722	Cfa.10574.1.A1_at	3.52621	5.22881
15943	Cfa.6344.1.A1_at	3.49609	5.43166
2938	Cfa.12506.3.S1_at	3.47256	4.79687
24862	CfaAffx.15899.1.S1_s_at	3.41304	6.07761
8902	Cfa.18759.2.S1_at	3.13934	5.98358
24881	CfaAffx.15920.1.S1_s_at	3.12987	6.04097
6884	Cfa.16351.1.S1_at	3.08316	4.50101
10452	Cfa.20396.1.S1_at	3.04783	7.86567
1483	Cfa.11274.1.A1_at	3.03047	7.37315
27459	CfaAffx.19068.1.S1_s_at	3.00297	9.81865
27458	CfaAffx.19068.1.S1_at	2.91551	8.45523
24315	CfaAffx.15227.1.S1_s_at	2.89928	10.3891
11824	Cfa.2469.1.S1_at	2.89601	6.49129
12467	Cfa.306.1.S1_at	2.88438	5.03239
15329	Cfa.5781.1.A1_s_at	2.88146	5.56417
29985	CfaAffx.22155.1.S1_s_at	2.80866	7.63441
11800	Cfa.2445.1.S1_at	2.74187	5.18743
2901	Cfa.12476.1.A1_at	2.72843	4.16375
8932	Cfa.1879.1.S1_s_at	2.72224	4.5376
13236	Cfa.3780.1.S1_at	2.6728	10.6712
2596	Cfa.12226.1.A1_at	2.63239	11.8265
816	Cfa.10651.1.A1_at	2.61446	7.66798
26591	CfaAffx.18010.1.S1_s_at	2.60621	5.44335
13138	Cfa.3707.2.S1_at	2.57536	7.37945
31718	CfaAffx.24362.1.S1_at	2.51073	5.76963
8040	Cfa.17835.1.S1_s_at	2.47925	5.31429
8901	Cfa.18759.1.S1_s_at	2.47839	4.39538
28941	CfaAffx.20845.1.S1_s_at	2.43352	5.3754
1410	Cfa.11202.1.S1_at	2.43236	3.30351
908	Cfa.10739.1.A1_s_at	2.43189	5.52046
2930	Cfa.12501.1.A1_at	2.42516	11.6542
35394	CfaAffx.28872.1.S1_at	2.39946	5.63241
4125	Cfa.13592.1.A1_at	2.39813	4.82949
20806	CfaAffx.10947.1.S1_s_at	2.39579	12.0086
13687	Cfa.432.2.A1_at	2.39359	4.76338
34238	CfaAffx.27421.1.S1_at	2.38303	5.33578
16384	Cfa.6729.1.A1_at	2.37755	7.67408
34015	CfaAffx.27143.1.S1_s_at	2.33724	3.49845
12852	Cfa.346.1.A1_at	2.32702	3.79657
1409	Cfa.11200.1.A1_at	2.32267	3.93847
10735	Cfa.2080.1.S1_at	2.30543	6.33893
10489	Cfa.20456.1.S1_s_at	2.30039	3.58954
22067	CfaAffx.12503.1.S1_s_at	2.26747	9.48727
2510	Cfa.12161.1.A1_at	2.24404	6.63704
6841	Cfa.16308.1.S1_s_at	2.24077	6.17534
18208	Cfa.8292.1.A1_at	2.21753	4.02864
22808	CfaAffx.13342.1.S1_at	2.20303	5.98681
27314	CfaAffx.18897.1.S1_s_at	2.18736	3.23695
25627	CfaAffx.16843.1.S1_s_at	2.17884	6.57603
6840	Cfa.16308.1.S1_a_at	2.05181	6.26366
18507	Cfa.8530.1.A1_s_at	2.04296	3.84467
25272	CfaAffx.16396.1.S1_at	2.02296	6.92426
1039	Cfa.10853.1.A1_at	2.00733	7.43916
10488	Cfa.20456.1.S1_at	1.9928	3.34054
5844	Cfa.15172.1.A1_at	1.98338	5.64778
2517	Cfa.12168.1.A1_s_at	1.97785	8.53999
25996	CfaAffx.17282.1.S1_at	1.97117	3.35103
22597	CfaAffx.13109.1.S1_s_at	1.96049	4.80921
7682	Cfa.174.1.S1_s_at	1.95881	4.52534
17316	Cfa.7527.1.A1_at	1.95837	3.23455
14600	Cfa.5134.1.A1_s_at	1.94244	5.60472
42874	CfaAffx.9874.1.S1_s_at	1.91152	5.24302
21507	CfaAffx.11840.1.S1_at	1.89663	9.59713
24150	CfaAffx.15026.1.S1_s_at	1.88635	4.82617
2483	Cfa.1213.1.S1_s_at	1.88388	4.99609
12743	Cfa.334.1.A1_s_at	1.88038	3.23381
11238	Cfa.21325.1.S1_s_at	1.8404	5.99506
29969	CfaAffx.22128.1.S1_at	1.8336	11.8765
27753	CfaAffx.19424.1.S1_at	1.83163	5.20377
41867	CfaAffx.8635.1.S1_at	1.83139	3.20205
2626	Cfa.1225.1.S1_at	1.82155	8.255
5975	Cfa.15285.2.A1_a_at	1.81769	7.08003
23529	CfaAffx.14256.1.S1_s_at	1.80927	6.36516
973	Cfa.10796.1.S1_at	1.80507	7.66038
223	Cfa.10120.1.S1_at	1.79751	3.88368
14260	Cfa.4825.1.A1_at	1.79605	7.11418
1380	Cfa.11171.1.A1_at	1.79559	6.41707
16078	Cfa.6460.1.A1_at	1.79419	6.61429
5685	Cfa.15035.1.A1_at	1.79322	5.93596
9824	Cfa.19766.1.A1_at	1.78541	5.20334
10689	Cfa.20750.1.S1_at	1.77747	4.68034
13140	Cfa.3709.1.S1_s_at	1.77477	3.63541
21200	CfaAffx.11437.1.S1_s_at	1.76736	5.66317
30928	CfaAffx.23343.1.S1_s_at	1.76189	10.0727
6382	Cfa.15666.1.A1_at	1.7614	3.88573
1250	Cfa.11049.1.A1_at	1.7567	3.02763
25402	CfaAffx.16568.1.S1_s_at	1.75649	6.63902
33442	CfaAffx.2644.1.S1_at	1.75014	2.64902
7615	Cfa.17318.1.S1_s_at	1.72511	9.92538
13273	Cfa.381.1.A1_at	1.71323	4.99739
37495	CfaAffx.3217.1.S1_s_at	1.70967	3.59676
28127	CfaAffx.19895.1.S1_s_at	1.70007	3.95904
7843	Cfa.17628.1.S1_at	1.69763	3.35932
15595	Cfa.6022.1.A1_at	1.69474	5.48251
25309	CfaAffx.16441.1.S1_s_at	1.69143	4.96876
25103	CfaAffx.16198.1.S1_s_at	1.68385	5.72247
8509	Cfa.1835.1.S1_at	1.67552	5.98574
12893	Cfa.3497.1.A1_s_at	1.67545	7.12654
6961	Cfa.16431.1.A1_at	1.66177	6.3204
24289	CfaAffx.15203.1.S1_s_at	1.65975	5.1654
35433	CfaAffx.28932.1.S1_s_at	1.64067	2.97156
8579	Cfa.18423.1.S1_at	1.63982	4.63945
35102	CfaAffx.28496.1.S1_at	1.63561	3.85239
36011	CfaAffx.29633.1.S1_s_at	1.62798	6.18909
21975	CfaAffx.1239.1.S1_s_at	1.61456	6.08778
28933	CfaAffx.20839.1.S1_at	1.61112	3.5487
367	Cfa.10265.1.S1_at	1.61075	4.06895
15900	Cfa.6300.1.A1_at	1.60364	8.38835
21193	CfaAffx.11424.1.S1_at	1.60334	4.75146
39534	CfaAffx.5799.1.S1_s_at	1.59267	5.58484
18628	Cfa.8622.1.A1_s_at	1.58458	3.71779
10913	Cfa.20978.1.S1_s_at	1.55806	5.93458
38593	CfaAffx.4561.1.S1_s_at	1.551	3.75358
2973	Cfa.1254.1.S1_s_at	1.54698	10.0756
26909	CfaAffx.18405.1.S1_s_at	1.54695	6.40509
9217	Cfa.1912.1.S1_at	1.54643	4.15662
1402	Cfa.11192.1.A1_at	1.54459	3.85418
11140	Cfa.21205.1.S1_s_at	1.54166	5.38972
37782	CfaAffx.3570.1.S1_s_at	1.53746	10.3436
18535	Cfa.8552.1.A1_s_at	1.52336	5.06039
25449	CfaAffx.16629.1.S1_s_at	1.52221	4.44
20060	CfaAffx.10040.1.S1_s_at	1.507	3.30035
31539	CfaAffx.24141.1.S1_at	1.50429	7.13953
27353	CfaAffx.18949.1.S1_at	1.50274	5.05114
26083	CfaAffx.17386.1.S1_s_at	1.50049	6.13862
33758	CfaAffx.26828.1.S1_at	1.49588	8.67316
27836	CfaAffx.19540.1.S1_at	1.49044	6.20877
21236	CfaAffx.11480.1.S1_at	1.48713	4.60237
33082	CfaAffx.25997.1.S1_s_at	1.48112	6.53273
42740	CfaAffx.9696.1.S1_at	1.4792	7.25652
22666	CfaAffx.13182.1.S1_at	1.47401	4.96121
3268	Cfa.12793.1.A1_at	1.46628	7.97839
34577	CfaAffx.27859.1.S1_at	1.46271	4.72812
5954	Cfa.15263.2.A1_at	1.45592	3.95201
1524	Cfa.11304.1.A1_at	1.45077	6.99656
21303	CfaAffx.11580.1.S1_at	1.43984	6.42829
37338	CfaAffx.31279.1.S1_at	1.4348	5.84615
1111	Cfa.10910.1.A1_s_at	1.43129	6.11278
9927	Cfa.19866.1.S1_at	1.42494	8.40288
35913	CfaAffx.2951.1.S1_at	1.42385	7.69437
11832	Cfa.2476.1.A1_a_at	1.4233	6.49618
10613	Cfa.20664.1.S1_s_at	1.42217	4.111
40537	CfaAffx.7006.1.S1_s_at	1.42089	4.73494
28064	CfaAffx.19822.1.S1_at	1.41916	8.45874
24234	CfaAffx.15143.1.S1_at	1.41855	7.54157
21733	CfaAffx.12100.1.S1_at	1.41273	4.17983
30659	CfaAffx.23012.1.S1_at	1.40751	4.41374
38437	CfaAffx.4359.1.S1_s_at	1.39654	4.99534
6888	Cfa.16355.1.S1_at	1.39591	8.67698
4968	Cfa.14372.1.S1_at	1.39487	5.54471
41986	CfaAffx.8781.1.S1_s_at	1.39235	6.4955
195	Cfa.10092.1.A1_at	1.39083	5.81506
10085	Cfa.20022.1.S1_s_at	1.38607	3.50678
16703	Cfa.6991.1.A1_at	1.37519	8.62683
37783	CfaAffx.3571.1.S1_s_at	1.36956	7.41314
17447	Cfa.764.1.S1_at	1.36531	6.30939
17049	Cfa.7297.1.A1_at	1.36531	3.59208
29246	CfaAffx.21232.1.S1_s_at	1.36334	2.63161
37637	CfaAffx.3387.1.S1_at	1.36106	3.47991
40150	CfaAffx.6562.1.S1_at	1.35967	4.86264
40148	CfaAffx.6560.1.S1_at	1.35536	5.166
35061	CfaAffx.28439.1.S1_at	1.35519	6.62392
18211	Cfa.8295.1.S1_at	1.35264	5.49967
2947	Cfa.12514.1.A1_at	1.34955	8.01874
6396	Cfa.15678.1.A1_at	1.34779	5.74378
12982	Cfa.3572.1.S1_s_at	1.34773	6.5045
25162	CfaAffx.16257.1.S1_s_at	1.34713	4.09355
31268	CfaAffx.2381.1.S1_at	1.34663	5.9018
12792	Cfa.3398.1.A1_s_at	1.34466	8.60802
36687	CfaAffx.30492.1.S1_at	1.34282	5.15683
8568	Cfa.18413.1.S1_at	1.33951	5.44946
39000	CfaAffx.5089.1.S1_at	1.33753	4.81712
26362	CfaAffx.17717.1.S1_at	1.33669	4.8845
4764	Cfa.14184.1.A1_at	1.33071	6.36338
19900	Cfa.9868.1.A1_at	1.32594	6.66321
29003	CfaAffx.2093.1.S1_at	1.32423	4.69582
12328	Cfa.2927.1.S1_at	1.32394	9.47197
8714	Cfa.18573.1.S1_at	1.31981	5.2617
36806	CfaAffx.30639.1.S1_s_at	1.31356	6.66788
15239	Cfa.5696.1.A1_at	1.31342	3.92792
26684	CfaAffx.18128.1.S1_s_at	1.31256	3.89754
28666	CfaAffx.20529.1.S1_at	1.31094	7.8809
5561	Cfa.14928.1.S1_s_at	1.30925	7.16585
27830	CfaAffx.19534.1.S1_at	1.30866	6.81449
12436	Cfa.303.1.A1_at	1.30708	5.52293
29298	CfaAffx.21308.1.S1_s_at	1.30446	6.87305
42319	CfaAffx.9180.1.S1_s_at	1.30201	5.81582
10952	Cfa.2101.1.A1_at	1.2995	5.95234
29502	CfaAffx.21575.1.S1_s_at	1.29595	7.14173
30482	CfaAffx.22774.1.S1_at	1.29593	4.18642
30865	CfaAffx.23270.1.S1_s_at	1.29503	4.62215
12316	Cfa.2913.1.A1_at	1.29495	6.37402
8255	Cfa.18077.1.S1_s_at	1.29378	8.10848
22838	CfaAffx.13379.1.S1_at	1.28714	3.49311
8204	Cfa.18008.1.S1_s_at	1.28576	3.68249
28909	CfaAffx.2081.1.S1_s_at	1.28362	3.75501
26892	CfaAffx.18382.1.S1_s_at	1.28341	4.62636
35611	CfaAffx.29148.1.S1_at	1.28328	4.63465
36686	CfaAffx.30490.1.S1_at	1.28175	4.98641
25645	CfaAffx.16862.1.S1_at	1.27961	4.42973
5254	Cfa.14639.1.S1_at	1.27823	3.60716
13108	Cfa.3680.1.S1_s_at	1.27799	4.96187
6929	Cfa.16391.2.A1_at	1.27649	8.63301
12378	Cfa.2974.1.S1_at	1.275	4.42578
28448	CfaAffx.20286.1.S1_s_at	1.2742	7.51122
30469	CfaAffx.22757.1.S1_s_at	1.27409	7.43067
32848	CfaAffx.2571.1.S1_at	1.27373	4.08609
15283	Cfa.5737.1.A1_s_at	1.27124	3.95888
641	Cfa.10510.1.A1_at	1.26982	4.3157
40157	CfaAffx.6570.1.S1_at	1.26978	5.38505
990	Cfa.10810.2.S1_s_at	1.26482	9.45302
39184	CfaAffx.5353.1.S1_s_at	1.26463	4.29247
18258	Cfa.8331.2.S1_at	1.26076	2.67755
39452	CfaAffx.5694.1.S1_at	1.25943	6.826
22580	CfaAffx.1309.1.S1_at	1.25812	6.24032
8625	Cfa.18473.1.S1_s_at	1.25741	6.28431
6930	Cfa.16391.2.A1_x_at	1.25727	8.13338
23806	CfaAffx.14622.1.S1_at	1.25697	6.64541
35529	CfaAffx.2905.1.S1_s_at	1.25581	5.88624
19896	Cfa.9863.1.A1_at	1.24952	3.67098
19971	Cfa.9940.1.S1_at	1.24879	7.55971
6194	Cfa.15496.1.A1_at	1.24745	8.90429
22596	CfaAffx.13109.1.S1_at	1.24597	4.78173
19513	Cfa.9459.1.A1_s_at	1.24542	5.94791
28065	CfaAffx.19822.1.S1_s_at	1.24244	7.89224
10682	Cfa.20743.1.S1_at	1.24221	4.87797
31374	CfaAffx.23941.1.S1_s_at	1.24178	6.05101
19711	Cfa.9662.1.A1_at	1.23985	8.17963
6893	Cfa.1636.1.A1_s_at	1.23971	4.87215
11834	Cfa.2479.1.S1_at	1.23748	7.65878
33978	CfaAffx.27099.1.S1_at	1.23723	4.39321
34933	CfaAffx.28267.1.S1_s_at	1.23644	5.46352
19252	Cfa.9207.1.A1_at	1.23573	9.43493
16308	Cfa.6663.1.A1_at	1.23562	6.91849
29503	CfaAffx.21576.1.S1_at	1.232	4.36359
20692	CfaAffx.10818.1.S1_s_at	1.23181	6.67129
794	Cfa.10634.1.A1_at	1.23065	6.34021
40075	CfaAffx.6465.1.S1_at	1.22477	5.89141
34889	CfaAffx.28205.1.S1_at	1.22472	6.287
26746	CfaAffx.182.1.S1_at	1.22252	5.15647
23945	CfaAffx.14795.1.S1_at	1.22209	3.69584
18095	Cfa.8193.1.S1_at	1.2181	5.2614
10647	Cfa.20705.1.S1_s_at	1.21384	5.41807
22813	CfaAffx.13349.1.S1_at	1.21283	5.04069
12997	Cfa.3589.1.S1_s_at	1.2122	6.40916
41203	CfaAffx.7850.1.S1_at	1.21187	3.67474
28531	CfaAffx.20375.1.S1_s_at	1.21108	5.30263
13119	Cfa.3691.1.S1_s_at	1.20925	4.73422
4352	Cfa.13799.1.A1_at	1.20445	4.16964
21339	CfaAffx.11622.1.S1_at	1.20338	5.80381
15385	Cfa.5832.1.A1_a_at	1.20184	4.02596
35816	CfaAffx.29368.1.S1_s_at	1.20141	4.60788
15824	Cfa.6238.1.A1_at	1.20065	8.28512
39738	CfaAffx.6059.1.S1_at	1.19475	10.0436
21246	CfaAffx.11492.1.S1_s_at	1.1937	5.53558
33468	CfaAffx.26473.1.S1_at	1.19263	3.36894
40330	CfaAffx.6775.1.S1_at	1.1913	5.36406
28977	CfaAffx.20898.1.S1_s_at	1.19095	4.41211
27078	CfaAffx.18613.1.S1_s_at	1.1901	9.25294
26479	CfaAffx.17868.1.S1_s_at	1.18862	10.9968
24923	CfaAffx.15972.1.S1_at	1.1873	4.22691
516	Cfa.10400.1.A1_at	1.18645	5.10909
39015	CfaAffx.5105.1.S1_at	1.1795	3.5822
28396	CfaAffx.20214.1.S1_s_at	1.179	5.20737
8655	Cfa.18508.1.S1_s_at	1.17877	7.63284
12824	Cfa.3432.1.S1_at	1.17742	5.82323
11003	Cfa.21056.1.S1_at	1.17589	7.24771
13137	Cfa.3707.1.A1_s_at	1.17528	3.11074
25302	CfaAffx.16434.1.S1_s_at	1.1747	8.47157
23348	CfaAffx.14021.1.S1_at	1.17321	3.8157
34229	CfaAffx.27412.1.S1_s_at	1.17084	3.51692
30625	CfaAffx.22977.1.S1_at	1.17074	3.61777
28414	CfaAffx.20239.1.S1_at	1.17024	10.0526
18933	Cfa.8884.1.A1_s_at	1.17004	4.49679
39072	CfaAffx.5187.1.S1_s_at	1.16883	6.39105
32079	CfaAffx.24826.1.S1_s_at	1.16807	4.07054
25452	CfaAffx.16631.1.S1_at	1.16739	7.62242
20811	CfaAffx.10951.1.S1_at	1.16736	4.07596
15050	Cfa.5523.1.S1_s_at	1.16633	5.95622
14928	Cfa.5413.1.A1_at	1.16226	9.5207
18469	Cfa.85.1.S1_s_at	1.1618	6.47488
20076	CfaAffx.10063.1.S1_at	1.16056	6.77161
23435	CfaAffx.14145.1.S1_at	1.1578	6.37186
41488	CfaAffx.818.1.S1_at	1.15754	4.31977
31226	CfaAffx.23752.1.S1_s_at	1.15635	7.7177
7619	Cfa.17323.1.S1_s_at	1.15617	5.92653
24060	CfaAffx.14924.1.S1_at	1.15588	5.92548
26694	CfaAffx.18139.1.S1_s_at	1.1542	2.52737
30294	CfaAffx.22529.1.S1_s_at	1.15386	6.36462
33098	CfaAffx.26017.1.S1_at	1.15186	4.91934
7367	Cfa.17006.1.S1_at	1.15164	5.31996
26411	CfaAffx.17779.1.S1_s_at	1.15071	4.51174
9464	Cfa.19426.1.S1_at	1.15044	7.27394
38041	CfaAffx.3895.1.S1_at	1.1503	5.81729
38130	CfaAffx.4005.1.S1_s_at	1.14801	3.54881
42344	CfaAffx.9219.1.S1_at	1.14695	3.27554
30699	CfaAffx.23062.1.S1_at	1.14351	5.39957
37225	CfaAffx.31160.1.S1_at	1.14276	4.68189
26486	CfaAffx.17877.1.S1_s_at	1.13961	3.93709
17284	Cfa.7499.1.S1_at	1.13794	6.20246
24541	CfaAffx.15498.1.S1_at	1.13657	4.67461
26162	CfaAffx.1747.1.S1_at	1.13649	7.35393
5407	Cfa.1479.1.A1_at	1.13616	3.96149
40326	CfaAffx.6771.1.S1_s_at	1.13422	4.77666
29242	CfaAffx.21225.1.S1_s_at	1.13287	2.87634
29406	CfaAffx.21443.1.S1_at	1.13173	4.09307
32685	CfaAffx.25509.1.S1_s_at	1.13138	5.76792
608	Cfa.10486.1.A1_at	1.13134	6.66393
13532	Cfa.4089.1.S1_at	1.12612	5.53726
20731	CfaAffx.10864.1.S1_at	1.12601	9.90907
42268	CfaAffx.9117.1.S1_at	1.1248	5.19323
23184	CfaAffx.13822.1.S1_s_at	1.12405	8.48715
490	Cfa.10376.1.A1_at	1.1222	8.0629
29202	CfaAffx.21183.1.S1_at	1.12216	4.77477
9075	Cfa.18951.1.S1_at	1.12138	12.0325
33760	CfaAffx.26833.1.S1_s_at	1.12049	5.48633
2976	Cfa.12541.1.A1_at	1.12048	3.12482
18952	Cfa.89.1.S1_at	1.11882	3.19293
19614	Cfa.9558.1.A1_at	1.1187	6.63282
28437	CfaAffx.20271.1.S1_at	1.11851	7.22417
34731	CfaAffx.28026.1.S1_s_at	1.11678	3.45072
19538	Cfa.9484.1.A1_s_at	1.11665	4.54654
29990	CfaAffx.22162.1.S1_at	1.11582	3.22822
13433	Cfa.3951.1.A1_at	1.10961	3.84841
3659	Cfa.13157.1.A1_at	1.10918	4.6882
25510	CfaAffx.16707.1.S1_s_at	1.10864	7.86742
30258	CfaAffx.22478.1.S1_s_at	1.10804	4.57034
32820	CfaAffx.25674.1.S1_s_at	1.10606	3.22102
24966	CfaAffx.16020.1.S1_at	1.10591	4.24064
33919	CfaAffx.27026.1.S1_s_at	1.10451	6.6305
10382	Cfa.20317.1.S1_at	1.10422	8.9809
7551	Cfa.1724.2.A1_at	1.10418	5.88058
270	Cfa.10171.1.A1_at	1.10413	8.38132
11645	Cfa.231.1.A1_at	1.10395	7.92189
14742	Cfa.5258.1.A1_s_at	1.10303	6.1123
9133	Cfa.19013.1.S1_s_at	1.10286	4.20721
5891	Cfa.1521.1.S1_at	1.10207	8.23908
4469	Cfa.13912.1.A1_at	1.10175	10.616
42467	CfaAffx.9355.1.S1_at	1.10004	4.42878
255	Cfa.10156.1.A1_at	1.09968	5.38004
23605	CfaAffx.14363.1.S1_at	1.09865	6.05807
18749	Cfa.8727.1.A1_at	1.0985	4.23658
14732	Cfa.525.1.S1_at	1.09847	9.97498
18106	Cfa.8203.1.A1_at	1.09775	7.70234
17187	Cfa.7415.1.A1_at	1.09651	7.13836
23039	CfaAffx.13625.1.S1_at	1.09613	6.02028
32025	CfaAffx.24768.1.S1_s_at	1.09475	6.2302
36618	CfaAffx.30405.1.S1_s_at	1.09467	5.17261
24784	CfaAffx.1580.1.S1_s_at	1.09467	9.03036
4771	Cfa.1419.1.A1_at	1.093	6.24751
21423	CfaAffx.11731.1.S1_at	1.09114	5.92188
365	Cfa.10261.1.S1_at	1.08993	6.47066
35501	CfaAffx.29013.1.S1_at	1.08952	5.22026
3774	Cfa.13270.1.S1_at	1.08905	4.82123
40622	CfaAffx.7108.1.S1_at	1.08798	8.75501
8516	Cfa.18356.1.S1_s_at	1.08787	4.6648
6420	Cfa.15697.1.A1_at	1.08746	5.6515
24287	CfaAffx.15201.1.S1_at	1.08719	4.31131
41890	CfaAffx.8672.1.S1_s_at	1.08671	10.7829
6297	Cfa.1559.1.A1_at	1.0854	8.49382
1233	Cfa.11031.1.A1_at	1.08385	3.64219
21392	CfaAffx.11699.1.S1_s_at	1.08299	7.19138
24508	CfaAffx.1546.1.S1_at	1.08284	4.66457
32997	CfaAffx.25885.1.S1_s_at	1.08176	4.27975
37281	CfaAffx.3122.1.S1_at	1.08068	5.30755
23520	CfaAffx.14246.1.S1_at	1.07836	7.92096
20214	CfaAffx.10229.1.S1_at	1.0735	9.23376
32329	CfaAffx.25091.1.S1_s_at	1.07329	5.03999
8523	Cfa.18363.1.S1_s_at	1.07281	7.25034
10448	Cfa.20388.1.S1_s_at	1.07223	3.50938
34972	CfaAffx.28315.1.S1_s_at	1.07012	6.21171
35814	CfaAffx.29366.1.S1_s_at	1.06896	3.61366
26930	CfaAffx.18433.1.S1_at	1.06659	7.94635
8145	Cfa.17944.1.S1_at	1.06611	8.53788
5024	Cfa.14425.1.S1_at	1.06582	4.90258
34333	CfaAffx.27543.1.S1_at	1.0654	6.27775
10006	Cfa.19950.1.S1_s_at	1.06493	4.63277
16091	Cfa.6474.1.A1_at	1.06471	3.83021
21996	CfaAffx.12419.1.S1_s_at	1.06404	9.68446
12340	Cfa.2937.1.A1_at	1.06265	8.50907
36092	CfaAffx.29720.1.S1_s_at	1.06106	5.60471
31449	CfaAffx.24027.1.S1_at	1.06082	7.41405
6683	Cfa.16089.1.S1_at	1.06057	6.04946
20253	CfaAffx.1027.1.S1_at	1.05809	4.00678
26326	CfaAffx.17673.1.S1_at	1.0568	4.68026
10806	Cfa.20876.1.S1_s_at	1.05628	7.92179
21789	CfaAffx.12169.1.S1_at	1.05529	5.03925
27292	CfaAffx.18871.1.S1_at	1.05499	6.59153
20414	CfaAffx.10454.1.S1_at	1.05494	5.71807
23338	CfaAffx.14010.1.S1_s_at	1.05437	7.44888
37695	CfaAffx.3459.1.S1_at	1.05351	6.6127
996	Cfa.10817.1.A1_at	1.05275	4.09229
5312	Cfa.14695.1.A1_s_at	1.05185	5.39859
13933	Cfa.4549.1.A1_at	1.05052	7.1699
9993	Cfa.19941.1.S1_s_at	1.04982	5.57754
13548	Cfa.4103.1.A1_at	1.04655	8.40216
14741	Cfa.5258.1.A1_at	1.04625	7.77217
29785	CfaAffx.21914.1.S1_s_at	1.04412	7.62902
2692	Cfa.12306.1.A1_at	1.04266	7.52858
38743	CfaAffx.4735.1.S1_s_at	1.04229	8.72547
31477	CfaAffx.24054.1.S1_s_at	1.04178	6.07413
36155	CfaAffx.29797.1.S1_s_at	1.04085	4.69914
6889	Cfa.16355.1.S1_s_at	1.04032	6.6988
37331	CfaAffx.31268.1.S1_s_at	1.03999	8.77566
6902	Cfa.1637.1.S1_s_at	1.03941	3.29894
28251	CfaAffx.20046.1.S1_s_at	1.03917	5.64438
604	Cfa.10483.1.A1_at	1.03858	6.20352
31299	CfaAffx.23845.1.S1_s_at	1.0384	4.29155
31349	CfaAffx.23913.1.S1_s_at	1.03792	6.78811
20586	CfaAffx.10677.1.S1_at	1.03784	4.77879
38054	CfaAffx.3912.1.S1_at	1.03555	3.74889
16577	Cfa.689.1.A1_at	1.03548	7.45084
28639	CfaAffx.20497.1.S1_s_at	1.03433	5.61758
16519	Cfa.6841.1.A1_at	1.0338	7.41913
4446	Cfa.1389.1.A1_at	1.03162	10.0609
18307	Cfa.8371.1.A1_at	1.03116	5.39651
27067	CfaAffx.18598.1.S1_s_at	1.03083	7.92008
31896	CfaAffx.24595.1.S1_s_at	1.03013	8.43192
31743	CfaAffx.24390.1.S1_at	1.03003	5.38842
10054	Cfa.19994.1.S1_s_at	1.02919	7.21639
29696	CfaAffx.21803.1.S1_at	1.02889	4.08938
18118	Cfa.8215.1.A1_at	1.02871	9.69448
42125	CfaAffx.8936.1.S1_at	1.02804	6.66007
10261	Cfa.20194.1.S1_s_at	1.02796	6.97177
28409	CfaAffx.20229.1.S1_at	1.02749	3.95629
41401	CfaAffx.8071.1.S1_at	1.02708	5.61522
12810	Cfa.3414.1.A1_at	1.0267	7.42311
40834	CfaAffx.738.1.S1_x_at	1.02632	7.01467
22572	CfaAffx.13079.1.S1_s_at	1.02594	7.87659
23396	CfaAffx.14097.1.S1_s_at	1.02539	8.30784
9902	Cfa.19842.1.S1_s_at	1.0246	3.78593
28214	CfaAffx.20006.1.S1_at	1.02287	8.65302
33057	CfaAffx.25967.1.S1_at	1.02274	6.07225
42576	CfaAffx.9503.1.S1_at	1.02252	7.65032
22952	CfaAffx.13518.1.S1_s_at	1.02083	5.9444
31987	CfaAffx.24713.1.S1_at	1.02061	7.35089
11183	Cfa.21270.1.S1_s_at	1.02018	5.35987
23431	CfaAffx.14139.1.S1_at	1.0199	7.15851
8146	Cfa.17944.1.S1_s_at	1.01798	7.4877
19641	Cfa.9588.1.A1_at	1.01703	6.34151
9622	Cfa.19571.1.S1_s_at	1.01627	6.51852
1604	Cfa.11379.1.A1_at	1.01563	8.06141
27801	CfaAffx.1950.1.S1_s_at	1.01306	4.66807
17758	Cfa.7907.2.A1_a_at	1.01293	9.19095
7063	Cfa.16589.1.S1_at	1.01223	2.60423
40716	CfaAffx.7221.1.S1_s_at	1.01191	9.35311
4027	Cfa.13501.1.S1_at	1.0117	5.89817
24536	CfaAffx.15493.1.S1_s_at	1.01094	7.03833
30332	CfaAffx.22581.1.S1_at	1.01022	7.22404
41050	CfaAffx.7649.1.S1_at	1.00999	3.04751
41945	CfaAffx.8734.1.S1_s_at	1.00975	5.07981
42563	CfaAffx.9483.1.S1_at	1.00974	5.99272
35421	CfaAffx.28912.1.S1_at	1.00898	4.6993
25717	CfaAffx.16943.1.S1_s_at	1.00832	6.1187
14005	Cfa.461.1.A1_at	1.00732	6.66408
4315	Cfa.13764.1.S1_s_at	1.00724	3.93943
18304	Cfa.837.1.S1_at	1.00692	4.41481
11773	Cfa.2419.1.S1_at	1.00674	5.41867
2773	Cfa.12378.1.A1_at	1.00649	7.29372
13710	Cfa.4343.1.S1_s_at	1.00531	5.93894
34291	CfaAffx.27494.1.S1_at	1.0047	3.06203
13641	Cfa.4261.1.A1_at	1.00387	9.84344
15921	Cfa.6325.1.S1_s_at	1.00358	8.49894
17373	Cfa.7570.1.A1_s_at	1.0024	6.02511
35372	CfaAffx.28830.1.S1_at	1.00091	4.43657
6803	Cfa.16262.1.S1_at	1.00033	6.37812
4962	Cfa.1437.1.S1_at	0.999191	6.95827
17372	Cfa.7570.1.A1_at	0.999045	8.28574
26247	CfaAffx.17580.1.S1_s_at	0.998995	3.51355
15846	Cfa.6255.1.S1_s_at	0.99775	6.46834
22741	CfaAffx.13263.1.S1_at	0.997638	6.841
1822	Cfa.11570.1.A1_at	0.997562	2.55213
35373	CfaAffx.28830.1.S1_s_at	0.997403	4.17224
41475	CfaAffx.816.1.S1_at	0.996904	3.55111
2434	Cfa.12090.1.A1_at	0.996216	5.82199
3614	Cfa.13111.1.A1_at	0.996063	8.50162
42194	CfaAffx.9018.1.S1_s_at	0.994843	5.06378
1811	Cfa.11562.1.A1_at	0.9945	5.98398
8495	Cfa.18334.1.S1_s_at	0.99351	6.9917
10204	Cfa.2014.1.A1_at	0.99317	5.55188
21213	CfaAffx.1145.1.S1_at	0.991534	6.34049
12947	Cfa.3546.2.S1_s_at	0.991056	7.06476
6786	Cfa.16245.1.S1_s_at	0.990635	5.03012
9634	Cfa.19584.1.A1_at	0.990568	4.22381
33929	CfaAffx.2704.1.S1_at	0.990449	4.0409
8984	Cfa.1885.1.A1_at	0.990326	10.4399
826	Cfa.10662.1.S1_at	0.99019	6.18705
23502	CfaAffx.14226.1.S1_s_at	0.989949	8.59697
37741	CfaAffx.3512.1.S1_s_at	0.989899	4.87648
25800	CfaAffx.17030.1.S1_s_at	0.989872	5.67497
24116	CfaAffx.14985.1.S1_s_at	0.98756	4.78352
1639	Cfa.11405.1.A1_at	0.987542	5.44377
31709	CfaAffx.24355.1.S1_s_at	0.986397	4.29518
21225	CfaAffx.11465.1.S1_at	0.986287	4.51838
10939	Cfa.2100.1.S1_s_at	0.986142	3.90509
12841	Cfa.3449.1.S1_s_at	0.98607	4.39075
23069	CfaAffx.13661.1.S1_s_at	0.984472	3.27051
2257	Cfa.11947.1.A1_s_at	0.982747	7.6217
25183	CfaAffx.1628.1.S1_s_at	0.979144	9.97159
15951	Cfa.635.1.A1_at	0.978589	8.85761
21747	CfaAffx.12118.1.S1_s_at	0.977996	7.85215
11305	Cfa.21398.1.S1_s_at	0.977955	5.54958
35194	CfaAffx.28601.1.S1_s_at	0.977851	5.945
12379	Cfa.2975.1.S1_at	0.977256	4.08178
33750	CfaAffx.26814.1.S1_at	0.976655	5.86272
19205	Cfa.9156.1.A1_at	0.976185	4.44288
23982	CfaAffx.14834.1.S1_at	0.97602	6.37155
30139	CfaAffx.22345.1.S1_at	0.975603	4.6544
7356	Cfa.16996.1.S1_at	0.974586	6.8554
34217	CfaAffx.27391.1.S1_s_at	0.974495	5.90959
417	Cfa.10311.1.A1_at	0.973872	3.90114
4105	Cfa.13574.1.S1_s_at	0.973608	6.89478
7996	Cfa.1780.1.S1_at	0.973306	7.44278
18770	Cfa.8744.1.A1_s_at	0.972277	5.0436
13777	Cfa.4418.1.A1_a_at	0.971398	7.54624
12395	Cfa.299.1.A1_s_at	0.971379	12.6028
22762	CfaAffx.13280.1.S1_s_at	0.971215	7.25351
24728	CfaAffx.1573.1.S1_at	0.970421	5.26681
405	Cfa.103.1.A1_s_at	0.969341	7.63327
38347	CfaAffx.4257.1.S1_at	0.968361	5.26245
9866	Cfa.19805.1.S1_at	0.967642	2.99569
34669	CfaAffx.27957.1.S1_at	0.967012	6.70005
7331	Cfa.16961.2.S1_at	0.966926	5.0473
35550	CfaAffx.29071.1.S1_at	0.966621	7.10146
25411	CfaAffx.16579.1.S1_at	0.966394	6.8758
30869	CfaAffx.23279.1.S1_s_at	0.965688	6.86481
41847	CfaAffx.8612.1.S1_s_at	0.964176	3.87067
38441	CfaAffx.4364.1.S1_s_at	0.963825	6.89947
12870	Cfa.3473.1.S1_at	0.963644	5.73433
22609	CfaAffx.13120.1.S1_s_at	0.962206	6.48122
8639	Cfa.18489.1.S1_at	0.961995	3.87272
11073	Cfa.21139.1.S1_s_at	0.961848	4.41758
4639	Cfa.1407.1.S2_at	0.961003	8.5854
32424	CfaAffx.25205.1.S1_s_at	0.960705	9.23553
36071	CfaAffx.297.1.S1_at	0.959835	5.55509
22164	CfaAffx.12617.1.S1_x_at	0.959039	13.1484
26478	CfaAffx.17868.1.S1_at	0.958859	9.87127
23438	CfaAffx.14149.1.S1_s_at	0.956362	6.48462
29171	CfaAffx.21139.1.S1_at	0.955974	8.90813
17759	Cfa.7907.2.A1_x_at	0.95593	9.41041
4193	Cfa.13653.1.A1_at	0.955449	3.76619
30757	CfaAffx.23135.1.S1_s_at	0.955318	8.07981
36541	CfaAffx.30291.1.S1_s_at	0.954227	5.65408
2505	Cfa.12156.1.A1_at	0.953084	6.03832
18823	Cfa.8783.1.S1_s_at	0.952999	9.14109
36803	CfaAffx.30637.1.S1_at	0.952281	7.02324
9342	Cfa.19239.1.S1_s_at	0.951043	8.46573
3581	Cfa.13084.1.A1_s_at	0.950779	6.26046
17994	Cfa.810.1.A1_at	0.95055	6.54753
40935	CfaAffx.7499.1.S1_s_at	0.950474	5.68543
5882	Cfa.15200.1.S1_at	0.95013	3.23752
11128	Cfa.21191.1.S1_a_at	0.949387	9.21768
32304	CfaAffx.25064.1.S1_at	0.949123	9.6524
13543	Cfa.41.1.S1_s_at	0.948966	8.19663
30279	CfaAffx.22509.1.S1_s_at	0.948831	4.29984
34348	CfaAffx.27566.1.S1_s_at	0.94789	4.86054
14941	Cfa.5426.1.A1_at	0.947449	6.16916
34449	CfaAffx.27691.1.S1_s_at	0.947412	6.66786
21922	CfaAffx.12324.1.S1_at	0.947182	6.00212
14073	Cfa.4664.1.A1_at	0.946901	6.75792
40089	CfaAffx.6489.1.S1_at	0.946867	3.93463
2983	Cfa.12547.1.A1_at	0.946814	6.89706
21226	CfaAffx.11466.1.S1_at	0.945777	5.96662
21650	CfaAffx.11997.1.S1_at	0.94509	4.51927
17867	Cfa.8007.1.A1_at	0.944961	9.45517
4465	Cfa.13909.1.A1_s_at	0.944845	4.00767
41447	CfaAffx.8124.1.S1_s_at	0.943753	5.4807
40772	CfaAffx.7304.1.S1_at	0.943338	3.94591
27837	CfaAffx.19542.1.S1_at	0.942543	6.49767
26686	CfaAffx.1813.1.S1_s_at	0.941165	5.66312
6901	Cfa.16368.1.S1_at	0.940607	4.34802
18730	Cfa.871.1.S1_at	0.939701	10.0517
5857	Cfa.15181.1.A1_s_at	0.939185	6.77763
35256	CfaAffx.28689.1.S1_s_at	0.939171	5.64041
26206	CfaAffx.17526.1.S1_at	0.938924	4.4359
33839	CfaAffx.26925.1.S1_s_at	0.937918	4.15417
30100	CfaAffx.22299.1.S1_s_at	0.936033	11.5509
10711	Cfa.20778.1.S1_at	0.935278	7.56603
38570	CfaAffx.4532.1.S1_s_at	0.933513	12.6321
13272	Cfa.3809.1.A1_s_at	0.93241	7.1204
35763	CfaAffx.29312.1.S1_at	0.93229	8.09242
17757	Cfa.7907.1.A1_x_at	0.931626	6.25703
8692	Cfa.18547.1.S1_at	0.930257	8.95171
19091	Cfa.9044.1.A1_at	0.930049	6.99013
11646	Cfa.231.1.A1_s_at	0.929701	6.88426
31024	CfaAffx.23488.1.S1_s_at	0.929047	6.29505
9860	Cfa.198.1.S1_s_at	0.929024	7.3046
31915	CfaAffx.24613.1.S1_s_at	0.928519	5.46644
14226	Cfa.4795.1.A1_at	0.928057	6.73226
38929	CfaAffx.4990.1.S1_s_at	0.927979	6.20295
12988	Cfa.3579.1.S1_s_at	0.926609	6.16847
14067	Cfa.4660.1.A1_at	0.92654	5.45178
12509	Cfa.31.1.S1_s_at	0.925735	8.38877
11123	Cfa.21183.1.S1_s_at	0.925655	7.27854
40850	CfaAffx.7398.1.S1_at	0.925496	11.2579
10570	Cfa.20597.1.S1_s_at	0.925379	5.65232
13464	Cfa.3978.1.S1_at	0.924712	7.48728
25950	CfaAffx.17229.1.S1_x_at	0.924354	7.12351
32496	CfaAffx.25289.1.S1_s_at	0.922391	5.83357
2500	Cfa.12149.1.S1_at	0.922246	8.60498
24187	CfaAffx.15080.1.S1_at	0.921563	4.39533
37713	CfaAffx.3482.1.S1_s_at	0.921015	4.38845
32749	CfaAffx.25584.1.S1_at	0.920666	5.49114
31251	CfaAffx.2379.1.S1_at	0.919592	4.4622
23694	CfaAffx.14483.1.S1_s_at	0.919514	3.38761
6709	Cfa.16145.1.S1_at	0.918148	3.77766
28943	CfaAffx.20848.1.S1_s_at	0.916804	8.86693
30749	CfaAffx.23129.1.S1_at	0.916609	8.58577
27134	CfaAffx.18671.1.S1_s_at	0.914889	7.14672
2534	Cfa.12185.1.A1_at	0.914524	7.87325
10727	Cfa.20794.1.S1_at	0.913756	7.29852
20375	CfaAffx.10413.1.S1_at	0.911629	8.07065
38156	CfaAffx.4032.1.S1_at	0.910195	5.91788
42398	CfaAffx.9271.1.S1_s_at	0.910142	6.27393
42595	CfaAffx.9528.1.S1_s_at	0.909972	4.87029
10728	Cfa.20794.1.S1_s_at	0.909171	7.33443
34266	CfaAffx.27461.1.S1_s_at	0.908993	5.43821
6146	Cfa.15451.1.A1_at	0.908617	5.76175
12673	Cfa.3265.1.A1_s_at	0.90836	6.41541
12475	Cfa.3066.1.S1_s_at	0.90764	6.72264
12917	Cfa.3515.1.S1_s_at	0.907436	2.95119
15089	Cfa.5557.1.A1_at	0.906569	4.53699
15052	Cfa.5525.1.A1_at	0.905527	9.84292
10221	Cfa.20155.1.S1_s_at	0.905484	4.27581
11040	Cfa.21109.1.S1_s_at	0.905183	5.20796
33277	CfaAffx.26239.1.S1_at	0.904595	5.24145
39106	CfaAffx.5235.1.S1_at	0.904246	4.58828
665	Cfa.1053.1.S1_at	0.904008	8.9873
972	Cfa.10795.1.A1_s_at	0.903713	4.69433
5483	Cfa.14859.1.A1_at	0.903547	7.64599
16310	Cfa.6665.1.A1_s_at	0.90247	7.71564
11139	Cfa.21204.1.S1_at	0.902318	8.84883
20046	CfaAffx.10024.1.S1_s_at	0.90201	11.6551
14409	Cfa.496.1.A1_s_at	0.901734	4.75
13765	Cfa.4407.1.A1_at	0.901573	4.86571
20482	CfaAffx.10536.1.S1_at	0.900971	3.6224
22941	CfaAffx.13503.1.S1_s_at	0.900678	5.17862
2730	Cfa.12341.1.A1_at	0.900034	4.68755
30668	CfaAffx.23020.1.S1_at	0.899462	5.82674
24252	CfaAffx.15163.1.S1_at	0.898903	4.74475
9386	Cfa.19340.1.S1_s_at	0.898518	7.76695
40664	CfaAffx.7157.1.S1_s_at	0.898455	4.99767
20539	CfaAffx.10612.1.S1_s_at	0.898293	5.05129
4769	Cfa.14188.2.A1_s_at	0.897156	8.15805
10596	Cfa.20636.1.S1_at	0.896942	6.97395
16816	Cfa.7090.1.S1_s_at	0.896831	6.31206
1471	Cfa.11261.1.A1_at	0.896673	7.89367
14729	Cfa.5247.1.A1_at	0.896279	8.47839
24767	CfaAffx.15780.1.S1_s_at	0.895915	6.38551
25142	CfaAffx.16234.1.S1_at	0.89502	5.00346
23499	CfaAffx.14223.1.S1_at	0.894843	10.1601
42615	CfaAffx.9546.1.S1_at	0.894601	7.05011
41911	CfaAffx.8697.1.S1_s_at	0.894509	5.39449
21412	CfaAffx.11721.1.S1_s_at	0.894225	5.83339
21364	CfaAffx.11656.1.S1_at	0.894057	7.31497
35226	CfaAffx.28651.1.S1_s_at	0.893719	3.49126
9278	Cfa.19165.1.S1_s_at	0.893699	5.96332
1469	Cfa.1126.1.S1_s_at	0.893587	6.21717
39583	CfaAffx.5861.1.S1_s_at	0.893147	3.77283
25472	CfaAffx.16660.1.S1_at	0.8925	4.7289
23145	CfaAffx.13775.1.S1_at	0.892375	2.97609
34363	CfaAffx.27590.1.S1_s_at	0.89199	5.08084
16711	Cfa.6999.1.S1_at	0.891402	9.57678
35985	CfaAffx.29595.1.S1_s_at	0.890987	6.32237
19172	Cfa.9123.1.S1_at	0.890882	4.70257
26322	CfaAffx.17668.1.S1_s_at	0.889944	3.89658
40098	CfaAffx.6499.1.S1_at	0.889805	6.4873
35018	CfaAffx.28375.1.S1_at	0.889489	2.85138
35170	CfaAffx.28578.1.S1_at	0.889102	3.09793
23413	CfaAffx.14119.1.S1_at	0.888882	3.71092
16833	Cfa.7107.1.A1_at	0.888374	5.24533
30075	CfaAffx.22271.1.S1_s_at	0.888361	6.27402
5376	Cfa.1476.1.A1_at	0.888161	8.03261
7642	Cfa.17346.1.S1_s_at	0.887044	5.14447
6764	Cfa.16225.1.S1_s_at	0.886068	3.1258
11430	Cfa.2158.1.S1_at	0.885816	8.4303
38957	CfaAffx.5046.1.S1_s_at	0.885763	4.07813
8173	Cfa.17980.1.S1_s_at	0.885289	5.32174
41590	CfaAffx.8304.1.S1_at	0.884738	5.70845
22722	CfaAffx.1324.1.S1_at	0.884536	7.98488
2595	Cfa.12225.1.A1_at	0.884151	11.5138
11479	Cfa.21634.1.S1_at	0.884139	6.36601
25108	CfaAffx.16202.1.S1_s_at	0.883981	5.67878
19361	Cfa.9321.1.A1_at	0.883969	6.41949
10872	Cfa.20936.1.S1_s_at	0.88322	6.01703
3046	Cfa.1260.1.A1_s_at	0.883215	7.00949
5801	Cfa.15134.1.A1_s_at	0.882786	8.78925
13974	Cfa.4582.1.A1_at	0.882327	7.49727
12347	Cfa.2943.1.A1_at	0.881197	8.18745
7133	Cfa.16704.1.S1_at	0.88108	6.72082
42822	CfaAffx.9800.1.S1_at	0.880341	4.90615
9303	Cfa.19183.1.S1_s_at	0.88003	5.672
9423	Cfa.19384.1.S1_at	0.878867	5.9036
42372	CfaAffx.9248.1.S1_at	0.878827	4.25978
12193	Cfa.2802.1.S1_at	0.877984	5.27682
10928	Cfa.2099.1.A1_s_at	0.877596	3.92232
11193	Cfa.21283.1.S1_at	0.877564	7.54414
30091	CfaAffx.22285.1.S1_s_at	0.877547	6.68358
35845	CfaAffx.29414.1.S1_at	0.877408	5.91123
3856	Cfa.13339.1.A1_s_at	0.87722	6.62462
25341	CfaAffx.16484.1.S1_s_at	0.876939	8.96001
14877	Cfa.5370.1.A1_s_at	0.876628	10.2559
32190	CfaAffx.24931.1.S1_s_at	0.876493	6.78271
350	Cfa.10247.2.S1_at	0.8764	5.41728
19749	Cfa.9700.1.A1_at	0.876316	5.08018
18765	Cfa.8740.1.A1_at	0.876029	4.91705
1712	Cfa.11469.1.A1_s_at	0.875494	6.43161
40967	CfaAffx.7541.1.S1_s_at	0.875489	3.99614
12868	Cfa.3472.1.S1_s_at	0.875387	5.85028
29675	CfaAffx.21778.1.S1_at	0.875194	5.5253
39441	CfaAffx.5678.1.S1_s_at	0.873483	5.83449
15744	Cfa.617.1.A1_s_at	0.872748	7.33178
15953	Cfa.635.1.A2_at	0.87257	8.08112
21551	CfaAffx.11891.1.S1_at	0.87252	4.12868
37803	CfaAffx.36.1.S1_at	0.872422	9.35165
4632	Cfa.14062.1.A1_s_at	0.872025	4.36228
21206	CfaAffx.11443.1.S1_s_at	0.870863	7.48785
13709	Cfa.4343.1.S1_at	0.870209	7.66883
12146	Cfa.2757.1.S1_at	0.870076	7.19445
4622	Cfa.14057.1.A1_at	0.86999	3.46297
38742	CfaAffx.4735.1.S1_at	0.869389	8.54471
38213	CfaAffx.4092.1.S1_s_at	0.868916	9.58058
37976	CfaAffx.3810.1.S1_at	0.868143	3.41848
19096	Cfa.9048.1.A1_at	0.868073	5.67814
38698	CfaAffx.4685.1.S1_s_at	0.867781	7.41429
6078	Cfa.15390.1.A1_at	0.866828	6.00519
25710	CfaAffx.16935.1.S1_at	0.866822	6.98672
27127	CfaAffx.18664.1.S1_at	0.866652	3.66182
17947	Cfa.8062.1.A1_at	0.866554	3.85923
24014	CfaAffx.14867.1.S1_at	0.866462	3.60655
33886	CfaAffx.2699.1.S1_at	0.866203	5.48124
1860	Cfa.11605.1.A1_s_at	0.866033	4.73898
8753	Cfa.18609.2.S1_s_at	0.865162	5.9811
27825	CfaAffx.19526.1.S1_at	0.864605	6.26144
10027	Cfa.19971.1.S1_at	0.864465	2.54533
4963	Cfa.1437.1.S1_s_at	0.864295	6.04977
2125	Cfa.11836.1.A1_at	0.864261	6.92162
5533	Cfa.14901.1.A1_at	0.863296	3.29972
33800	CfaAffx.26887.1.S1_s_at	0.862727	4.14325
1875	Cfa.11620.1.A1_s_at	0.862679	5.91111
20163	CfaAffx.10167.1.S1_at	0.862154	6.97719
29935	CfaAffx.22089.1.S1_s_at	0.86211	8.73203
38586	CfaAffx.4554.1.S1_at	0.861686	4.38715
24978	CfaAffx.16032.1.S1_at	0.86148	6.95708
25217	CfaAffx.1632.1.S1_s_at	0.860984	6.35904
34607	CfaAffx.27890.1.S1_s_at	0.860716	4.66887
5759	Cfa.15096.1.S1_s_at	0.860235	9.77412
37535	CfaAffx.3267.1.S1_s_at	0.859647	9.57962
20802	CfaAffx.10943.1.S1_at	0.85935	4.24187
17149	Cfa.7385.1.S1_s_at	0.859182	4.89698
39187	CfaAffx.5356.1.S1_at	0.85868	3.51082
42377	CfaAffx.9252.1.S1_at	0.858489	4.75518
24875	CfaAffx.15915.1.S1_s_at	0.856833	9.76128
19016	Cfa.8966.1.A1_s_at	0.856814	5.72245
32788	CfaAffx.25637.1.S1_s_at	0.856469	6.22765
37200	CfaAffx.31123.1.S1_at	0.856326	5.1204
34448	CfaAffx.27691.1.S1_at	0.855874	5.43135
36122	CfaAffx.29762.1.S1_at	0.855312	6.95448
29886	CfaAffx.22033.1.S1_s_at	0.854979	6.52573
37546	CfaAffx.3278.1.S1_at	0.854525	5.08392
37534	CfaAffx.3267.1.S1_at	0.853808	10.1624
22587	CfaAffx.1310.1.S1_at	0.853527	7.05459
35824	CfaAffx.29384.1.S1_at	0.853506	3.418
25089	CfaAffx.16175.1.S1_s_at	0.853286	7.56092
34886	CfaAffx.2820.1.S1_s_at	0.853274	8.04089
22417	CfaAffx.12909.1.S1_at	0.852303	7.63576
33480	CfaAffx.26488.1.S1_at	0.852258	5.96339
40107	CfaAffx.6510.1.S1_s_at	0.85208	5.89892
8975	Cfa.18838.1.S1_s_at	0.851822	5.533
38353	CfaAffx.4263.1.S1_at	0.851801	4.83948
22240	CfaAffx.12704.1.S1_at	0.851677	5.96872
10214	Cfa.20149.1.S1_at	0.851663	4.6916
30638	CfaAffx.2299.1.S1_s_at	0.851492	4.84313
41778	CfaAffx.8530.1.S1_s_at	0.850989	3.68936
17384	Cfa.758.1.S1_at	0.850537	10.3827
151	Cfa.10044.1.A1_at	0.850199	5.8586
42379	CfaAffx.9253.1.S1_s_at	0.849821	7.41899
25711	CfaAffx.16936.1.S1_s_at	0.849497	10.4867
13691	Cfa.4324.1.S1_at	0.849428	4.56843
31967	CfaAffx.24692.1.S1_at	0.849281	7.79602
4966	Cfa.14370.1.A1_at	0.84802	7.86237
8879	Cfa.18733.1.S1_s_at	0.847571	9.0386
24253	CfaAffx.15164.1.S1_s_at	0.84748	6.34353
36166	CfaAffx.29810.1.S1_at	0.847363	2.7812
9380	Cfa.19328.1.S1_s_at	0.846895	3.25863
4429	Cfa.13873.1.S1_at	0.846685	5.15366
29751	CfaAffx.21868.1.S1_at	0.846469	5.35124
14859	Cfa.5356.1.A1_at	0.845981	4.23583
41793	CfaAffx.8547.1.S1_at	0.845972	5.52328
299	Cfa.102.1.S1_s_at	0.845941	4.91451
40319	CfaAffx.6762.1.S1_s_at	0.84578	5.95221
42123	CfaAffx.8934.1.S1_s_at	0.845685	3.09942
1994	Cfa.11725.1.A1_at	0.845453	7.02018
10369	Cfa.20303.1.S1_at	0.84525	7.41217
35563	CfaAffx.2909.1.S1_at	0.845118	6.43484
9086	Cfa.18964.1.S1_at	0.844209	3.96862
10937	Cfa.21.1.S1_s_at	0.844185	2.65534
12630	Cfa.322.1.S1_s_at	0.843945	6.21395
31387	CfaAffx.23955.1.S1_s_at	0.842948	6.45397
19126	Cfa.9082.1.A1_at	0.842785	4.73795
22336	CfaAffx.12818.1.S1_s_at	0.842759	2.7995
16893	Cfa.716.1.S1_at	0.84261	3.41844
36807	CfaAffx.30640.1.S1_s_at	0.8425	4.07222
9070	Cfa.18946.1.S1_s_at	0.842473	10.4799
19839	Cfa.9801.1.A1_at	0.842427	3.78694
6719	Cfa.16156.1.S1_at	0.841431	4.20539
40548	CfaAffx.7018.1.S1_s_at	0.841381	7.87555
27308	CfaAffx.18890.1.S1_at	0.840906	3.25981
6353	Cfa.15639.1.A1_at	0.840462	5.65841
14792	Cfa.5302.1.A1_at	0.84037	7.02826
31099	CfaAffx.23580.1.S1_at	0.840188	3.77589
2249	Cfa.11939.1.A1_s_at	0.83999	9.38133
32195	CfaAffx.24939.1.S1_s_at	0.839962	5.94898
15448	Cfa.5885.1.S1_s_at	0.839508	8.16435
24009	CfaAffx.14862.1.S1_at	0.839224	4.46063
32545	CfaAffx.25348.1.S1_s_at	0.838397	5.85124
21635	CfaAffx.11977.1.S1_s_at	0.83829	3.48716
22022	CfaAffx.12444.1.S1_s_at	0.838248	6.01499
6225	Cfa.15524.1.A1_s_at	0.837703	6.37063
23585	CfaAffx.14331.1.S1_at	0.837571	4.22744
671	Cfa.10533.1.S1_at	0.836763	7.92222
27138	CfaAffx.18674.1.S1_s_at	0.836701	6.59454
39355	CfaAffx.5567.1.S1_s_at	0.836488	9.60598
17523	Cfa.7704.1.A1_s_at	0.835576	5.69008
532	Cfa.10414.1.A1_at	0.835523	5.74516
35259	CfaAffx.28692.1.S1_s_at	0.835369	5.45947
20285	CfaAffx.10301.1.S1_at	0.834723	3.99952
15746	Cfa.6171.1.A1_at	0.834581	5.193
37904	CfaAffx.3728.1.S1_s_at	0.834505	8.08585
9857	Cfa.19797.1.A1_at	0.834239	2.73186
6986	Cfa.16462.1.S1_s_at	0.83379	7.25717
28718	CfaAffx.20603.1.S1_s_at	0.833686	7.81792
37930	CfaAffx.3758.1.S1_s_at	0.833049	5.79669
25216	CfaAffx.16319.1.S1_at	0.833039	6.27537
29656	CfaAffx.2176.1.S1_at	0.832684	4.33809
11991	Cfa.2620.1.A1_at	0.83265	6.36862
9829	Cfa.19770.1.S1_s_at	0.832266	6.11964
33637	CfaAffx.26669.1.S1_at	0.831914	4.0226
11475	Cfa.21629.1.S1_s_at	0.831564	5.41407
15725	Cfa.6150.1.A1_at	0.831377	6.46596
42741	CfaAffx.9696.1.S1_s_at	0.831038	7.71121
21227	CfaAffx.11468.1.S1_at	0.831011	4.76706
25532	CfaAffx.16729.1.S1_s_at	0.830824	7.60148
6104	Cfa.15410.1.A1_s_at	0.83019	9.3747
180	Cfa.10075.1.A1_at	0.829994	4.62745
31279	CfaAffx.23821.1.S1_s_at	0.829958	5.93646
30900	CfaAffx.23314.1.S1_s_at	0.829816	5.42216
21667	CfaAffx.12017.1.S1_at	0.829351	3.60092
8573	Cfa.18418.1.S1_at	0.829162	4.95437
38214	CfaAffx.4093.1.S1_at	0.828522	5.25153
6058	Cfa.15371.1.A1_at	0.828197	3.83306
17859	Cfa.8.1.S1_s_at	0.827931	5.0425
23411	CfaAffx.14116.1.S1_at	0.827667	5.20183
7154	Cfa.16732.1.A1_at	0.827402	6.19767
26751	CfaAffx.18209.1.S1_s_at	0.827087	2.87623
10611	Cfa.20663.1.A1_s_at	0.827077	8.43023
10346	Cfa.20277.1.S1_s_at	0.826784	5.99209
38928	CfaAffx.4990.1.S1_at	0.826546	4.74182
39175	CfaAffx.5340.1.S1_at	0.825748	5.20182
24989	CfaAffx.16044.1.S1_at	0.825507	5.17702
35586	CfaAffx.29114.1.S1_at	0.825484	4.57773
40705	CfaAffx.7212.1.S1_s_at	0.822663	9.4314
31953	CfaAffx.24673.1.S1_at	0.822299	8.46507
32606	CfaAffx.25417.1.S1_s_at	0.822204	4.26447
33042	CfaAffx.25947.1.S1_at	0.822053	5.71951
30678	CfaAffx.23031.1.S1_s_at	0.822045	2.88973
21371	CfaAffx.11665.1.S1_at	0.821681	4.34931
40022	CfaAffx.6401.1.S1_s_at	0.821564	5.30475
20531	CfaAffx.10600.1.S1_at	0.821253	5.89025
1528	Cfa.11307.1.A1_s_at	0.820998	6.39185
34650	CfaAffx.27936.1.S1_at	0.820761	8.08844
41114	CfaAffx.7736.1.S1_s_at	0.820458	8.06375
15576	Cfa.6003.1.S1_at	0.820434	8.76114
22974	CfaAffx.1355.1.S1_x_at	0.820388	3.7877
40076	CfaAffx.6465.1.S1_s_at	0.820291	8.18709
21824	CfaAffx.12212.1.S1_at	0.820145	3.95346
31071	CfaAffx.23551.1.S1_at	0.820063	4.87049
3010	Cfa.12571.1.A1_at	0.820046	6.20713
15904	Cfa.6305.1.S1_at	0.82004	10.1811
11999	Cfa.2628.1.A1_s_at	0.81975	6.64301
5757	Cfa.15094.2.S1_a_at	0.819546	11.2108
41439	CfaAffx.8114.1.S1_s_at	0.818711	3.66891
41234	CfaAffx.7890.1.S1_at	0.818505	6.5748
21418	CfaAffx.11727.1.S1_s_at	0.818267	6.58104
2728	Cfa.12340.1.A1_at	0.817991	7.84462
2707	Cfa.12321.1.A1_at	0.81798	7.79322
40823	CfaAffx.7367.1.S1_s_at	0.817549	4.26348
21589	CfaAffx.1193.1.S1_at	0.817243	5.19703
25105	CfaAffx.1620.1.S1_at	0.81714	5.54708
42727	CfaAffx.9676.1.S1_s_at	0.816341	8.18287
12577	Cfa.3168.1.A1_at	0.816212	10.555
24404	CfaAffx.15333.1.S1_at	0.816097	5.88878
37218	CfaAffx.31155.1.S1_s_at	0.815659	3.67673
10876	Cfa.20940.1.S1_s_at	0.815405	7.74165
15678	Cfa.6100.1.A1_at	0.814794	7.84286
36857	CfaAffx.30695.1.S1_s_at	0.814395	5.39991
38295	CfaAffx.4188.1.S1_s_at	0.81433	6.52148
31315	CfaAffx.23870.1.S1_s_at	0.813805	3.16514
35371	CfaAffx.28829.1.S1_at	0.813724	4.59744
41863	CfaAffx.8631.1.S1_s_at	0.813515	5.48494
27847	CfaAffx.19556.1.S1_s_at	0.813441	5.23362
26952	CfaAffx.1846.1.S1_s_at	0.813422	5.47893
38569	CfaAffx.4532.1.S1_at	0.812991	10.7536
2118	Cfa.11831.1.A1_at	0.811504	6.53652
28198	CfaAffx.1999.1.S1_at	0.810864	3.06759
38291	CfaAffx.4185.1.S1_at	0.810597	4.99354
11846	Cfa.2489.1.S1_at	0.810476	11.6884
13950	Cfa.4561.1.A1_at	0.809731	10.9935
17462	Cfa.7650.1.A1_a_at	0.809264	7.14689
38837	CfaAffx.4865.1.S1_s_at	0.809066	8.39982
6127	Cfa.15432.1.A1_s_at	0.808819	3.25099
36933	CfaAffx.30804.1.S1_s_at	0.808005	5.07077
35889	CfaAffx.29484.1.S1_at	0.807908	5.50507
25646	CfaAffx.16862.1.S1_s_at	0.807398	5.13465
8854	Cfa.1871.1.S1_at	0.806621	7.83088
25884	CfaAffx.17154.1.S1_at	0.806354	4.15836
8085	Cfa.17884.1.S1_at	0.806186	8.10398
24490	CfaAffx.15433.1.S1_at	0.80579	4.51428
24143	CfaAffx.15017.1.S1_at	0.805442	3.61052
32684	CfaAffx.25509.1.S1_at	0.805442	6.35639
1733	Cfa.11488.1.A1_at	0.805145	9.81565
41968	CfaAffx.876.1.S1_s_at	0.804972	9.27299
13719	Cfa.4357.1.A1_at	0.80466	6.24667
11130	Cfa.21191.2.S1_a_at	0.804509	8.83147
39764	CfaAffx.6090.1.S1_at	0.803895	4.5994
20998	CfaAffx.11161.1.S1_s_at	0.803744	4.99317
15952	Cfa.635.1.A1_s_at	0.803564	8.86187
5952	Cfa.15262.3.A1_s_at	0.802739	8.62188
41038	CfaAffx.7631.1.S1_s_at	0.802473	6.3848
32546	CfaAffx.25349.1.S1_s_at	0.80235	5.9778
39208	CfaAffx.5382.1.S1_at	0.802347	3.92072
23401	CfaAffx.14101.1.S1_s_at	0.801998	6.47861
24617	CfaAffx.15597.1.S1_s_at	0.8016	8.16586
21162	CfaAffx.11377.1.S1_s_at	0.8015	6.24516
32193	CfaAffx.24935.1.S1_s_at	0.800688	5.30573
1580	Cfa.11354.1.A1_s_at	0.80007	10.239
30478	CfaAffx.2277.1.S1_s_at	0.799844	7.01166
10050	Cfa.19990.1.S1_s_at	0.799803	6.32852
20372	CfaAffx.1041.1.S1_at	0.799506	7.001
14925	Cfa.5411.1.A1_s_at	0.799455	5.5907
1552	Cfa.1133.1.A1_s_at	0.799309	8.82116
1576	Cfa.11351.1.A1_s_at	0.798871	6.1258
12493	Cfa.3083.1.S1_at	0.798543	7.66561
24777	CfaAffx.15790.1.S1_at	0.798536	7.67735
25624	CfaAffx.1684.1.S1_at	0.798431	4.59861
17282	Cfa.7497.1.A1_at	0.798088	6.6685
34550	CfaAffx.2782.1.S1_s_at	0.798018	8.54892
14765	Cfa.528.1.S1_at	0.797696	5.28801
8360	Cfa.18187.1.S1_s_at	0.79762	4.26737
27088	CfaAffx.18623.1.S1_s_at	0.797482	6.97806
12616	Cfa.3208.1.A1_at	0.797417	5.93433
11009	Cfa.21063.1.S1_at	0.796877	6.72898
34074	CfaAffx.2723.1.S1_s_at	0.796858	4.87246
1285	Cfa.11081.1.S1_at	0.796132	11.6977
38597	CfaAffx.4567.1.S1_at	0.795778	10.6375
30335	CfaAffx.22584.1.S1_s_at	0.795594	7.64254
36466	CfaAffx.30194.1.S1_at	0.795511	6.463
32277	CfaAffx.25033.1.S1_s_at	0.795254	4.4803
8598	Cfa.18441.1.S1_s_at	0.795197	6.13738
5147	Cfa.14547.1.A1_at	0.795176	4.16166
27541	CfaAffx.19166.1.S1_at	0.795164	5.08162
24704	CfaAffx.15697.1.S1_at	0.794575	9.00581
40885	CfaAffx.7429.1.S1_at	0.794111	5.28882
8929	Cfa.18787.1.S1_s_at	0.793949	6.18999
32805	CfaAffx.25659.1.S1_s_at	0.793415	5.6899
23888	CfaAffx.14735.1.S1_at	0.793119	6.47518
754	Cfa.1060.1.S1_at	0.792988	8.77026
24124	CfaAffx.14994.1.S1_at	0.792962	5.06594
25907	CfaAffx.17173.1.S1_at	0.792823	4.21829
12973	Cfa.3565.1.S1_s_at	0.792666	9.09371
37590	CfaAffx.3333.1.S1_s_at	0.792301	5.32531
28929	CfaAffx.20834.1.S1_s_at	0.791811	7.72436
854	Cfa.10687.2.S1_a_at	0.791774	4.03676
8443	Cfa.1827.1.S1_at	0.79164	3.25012
42902	CfaAffx.9908.1.S1_at	0.791355	5.29361
943	Cfa.10770.1.S1_s_at	0.791094	11.4541
35846	CfaAffx.29414.1.S1_s_at	0.790889	5.13494
8390	Cfa.18214.1.S1_s_at	0.790803	7.26242
11841	Cfa.2485.1.S1_s_at	0.790369	8.40361
8068	Cfa.17864.1.S1_at	0.789975	5.04285
15304	Cfa.5759.1.A1_at	0.789751	3.46724
32577	CfaAffx.25383.1.S1_s_at	0.789729	6.8036
9573	Cfa.19526.1.S1_s_at	0.78911	4.45816
12330	Cfa.2929.1.A1_at	0.789061	7.94819
31856	CfaAffx.24533.1.S1_at	0.788807	3.63493
2047	Cfa.11769.1.A1_at	0.78878	5.46582
16517	Cfa.684.1.A1_at	0.788629	7.81173
39162	CfaAffx.5317.1.S1_at	0.788297	7.22254
27465	CfaAffx.19073.1.S1_at	0.787453	5.33492
19630	Cfa.9576.1.S1_at	0.78737	5.88838
14782	Cfa.5295.1.A1_at	0.787361	10.2248
32970	CfaAffx.2585.1.S1_s_at	0.78701	4.78423
42217	CfaAffx.9050.1.S1_s_at	0.78678	9.89745
21605	CfaAffx.11945.1.S1_s_at	0.786429	6.09535
4216	Cfa.13673.1.A1_at	0.786188	8.7239
30751	CfaAffx.23130.1.S1_at	0.785473	5.82358
13535	Cfa.4092.1.S1_at	0.785164	3.85348
6575	Cfa.1586.1.S1_s_at	0.784738	2.85352
7900	Cfa.1770.1.A1_at	0.784705	6.2809
17903	Cfa.8028.1.S1_s_at	0.784423	10.282
42213	CfaAffx.9044.1.S1_s_at	0.783813	7.31386
23570	CfaAffx.14312.1.S1_s_at	0.783655	6.48424
11971	Cfa.260.1.S1_at	0.783031	10.213
11070	Cfa.21134.1.S1_s_at	0.783021	6.70145
21584	CfaAffx.11926.1.S1_s_at	0.78302	5.99661
5213	Cfa.14605.1.A1_at	0.782985	8.8347
28489	CfaAffx.20325.1.S1_at	0.782786	7.9455
28115	CfaAffx.19880.1.S1_s_at	0.782703	4.22216
22156	CfaAffx.12608.1.S1_s_at	0.782455	4.0857
4896	Cfa.14307.1.A1_s_at	0.781628	4.40423
28891	CfaAffx.20794.1.S1_at	0.781098	3.82064
15029	Cfa.5505.1.A1_at	0.781028	8.47486
23214	CfaAffx.1386.1.S1_at	0.780016	3.4565
30290	CfaAffx.22525.1.S1_s_at	0.779812	4.07433
1408	Cfa.11198.1.A1_at	0.779778	7.34169
12904	Cfa.3505.1.S1_s_at	0.779675	3.95193
9356	Cfa.1928.1.S1_at	0.779113	7.73963
28060	CfaAffx.19818.1.S1_at	0.779017	7.13765
40920	CfaAffx.747.1.S1_s_at	0.778774	11.8107
40901	CfaAffx.7443.1.S1_at	0.778712	7.67021
24181	CfaAffx.15065.1.S1_s_at	0.778631	5.5477
35668	CfaAffx.29216.1.S1_at	0.778416	8.4197
24735	CfaAffx.1574.1.S1_s_at	0.777978	4.08569
8033	Cfa.17829.1.S1_s_at	0.777908	4.24733
10840	Cfa.20907.1.S1_a_at	0.777839	9.30273
10591	Cfa.20627.1.S1_s_at	0.777741	9.14499
17979	Cfa.8087.1.A1_at	0.777593	4.87481
8676	Cfa.18528.1.S1_at	0.777577	3.51108
42598	CfaAffx.953.1.S1_s_at	0.77709	6.71493
35083	CfaAffx.2847.1.S1_at	0.77696	3.29832
40127	CfaAffx.6539.1.S1_at	0.776798	4.88432
7264	Cfa.16863.1.S1_at	0.776794	7.75309
20934	CfaAffx.11093.1.S1_s_at	0.776693	6.07842
40797	CfaAffx.7339.1.S1_at	0.776588	5.1252
6896	Cfa.16362.1.S1_s_at	0.776486	6.40397
27627	CfaAffx.19270.1.S1_at	0.776477	6.98955
11211	Cfa.21299.1.S1_s_at	0.776275	8.71703
40833	CfaAffx.738.1.S1_s_at	0.775826	7.54681
38354	CfaAffx.4263.1.S1_s_at	0.775642	6.81422
27725	CfaAffx.19392.1.S1_at	0.775614	2.8567
9947	Cfa.1989.1.A1_at	0.775133	6.13537
742	Cfa.10589.1.A1_at	0.7751	7.73827
5593	Cfa.1496.1.A1_at	0.774845	10.2785
10968	Cfa.21023.1.S1_at	0.774407	4.29356
30872	CfaAffx.23284.1.S1_s_at	0.774375	3.18849
42798	CfaAffx.9765.1.S1_at	0.77403	9.98062
2463	Cfa.12112.1.S1_at	0.773781	7.08957
9763	Cfa.19706.1.S1_at	0.773607	6.82973
38802	CfaAffx.4803.1.S1_at	0.77344	3.88759
9263	Cfa.19154.2.S1_at	0.772776	3.18014
2219	Cfa.11913.1.A1_at	0.772336	3.45718
1693	Cfa.11452.2.A1_s_at	0.772109	4.42668
11482	Cfa.21637.1.S1_at	0.771922	7.66657
38401	CfaAffx.4315.1.S1_s_at	0.771009	7.21048
25066	CfaAffx.16143.1.S1_at	0.770288	3.91498
5626	Cfa.14987.1.A1_at	0.769961	6.62105
24438	CfaAffx.15379.1.S1_at	0.76992	5.9752
5565	Cfa.14930.1.S1_at	0.769664	7.30975
9637	Cfa.19587.1.S1_at	0.769463	7.88373
12354	Cfa.2953.1.A1_at	0.769302	7.432
27811	CfaAffx.1951.1.S1_s_at	0.769156	3.61792
32078	CfaAffx.24825.1.S1_s_at	0.7691	11.4962
21273	CfaAffx.1153.1.S1_s_at	0.768931	3.92454
14716	Cfa.5235.1.A1_s_at	0.768401	11.3821
27917	CfaAffx.19635.1.S1_s_at	0.768151	5.3082
8394	Cfa.18217.1.S1_s_at	0.768114	5.54358
37579	CfaAffx.3318.1.S1_x_at	0.767866	9.79273
37970	CfaAffx.3800.1.S1_s_at	0.767442	3.96866
873	Cfa.10704.1.S1_at	0.767427	6.72858
9731	Cfa.19678.2.A1_at	0.767343	6.19474
5982	Cfa.15294.1.A1_at	0.767093	2.68972
12717	Cfa.3312.1.S1_at	0.766669	7.65621
37141	CfaAffx.31050.1.S1_s_at	0.766622	7.33542
38502	CfaAffx.4443.1.S1_at	0.765466	5.88175
28163	CfaAffx.1994.1.S1_s_at	0.765422	6.14844
12474	Cfa.3066.1.S1_at	0.765381	7.84863
8542	Cfa.18383.1.S1_s_at	0.764763	10.6278
8242	Cfa.18055.1.S1_s_at	0.764444	4.59382
10562	Cfa.20584.1.S1_at	0.764361	4.56747
34685	CfaAffx.27975.1.S1_at	0.76355	4.27752
37990	CfaAffx.3825.1.S1_at	0.763543	6.76811
34941	CfaAffx.28278.1.S1_at	0.763482	3.98102
24956	CfaAffx.16008.1.S1_at	0.763289	5.64291
8921	Cfa.18778.1.S1_s_at	0.763086	4.13668
15669	Cfa.6092.1.A1_at	0.76297	5.06623
38173	CfaAffx.4051.1.S1_s_at	0.762369	5.71513
27756	CfaAffx.19429.1.S1_s_at	0.762311	6.44427
3449	Cfa.12958.1.A1_at	0.762041	4.90189
605	Cfa.10484.1.S1_at	0.761781	9.25139
31970	CfaAffx.24694.1.S1_s_at	0.761306	6.15762
15524	Cfa.5954.1.A1_at	0.760734	6.87631
1624	Cfa.11394.1.A1_s_at	0.759725	5.25235
28477	CfaAffx.20310.1.S1_at	0.758904	8.96141
29619	CfaAffx.21717.1.S1_at	0.758874	4.71787
13938	Cfa.4554.1.S1_s_at	0.758621	3.83343
24225	CfaAffx.15131.1.S1_s_at	0.758598	5.68116
28737	CfaAffx.20630.1.S1_s_at	0.758169	9.40108
386	Cfa.1028.1.A1_s_at	0.758144	9.82855
15088	Cfa.5556.1.A1_s_at	0.757938	8.59026
24400	CfaAffx.15329.1.S1_at	0.75778	7.23767
41878	CfaAffx.8658.1.S1_s_at	0.757672	8.52109
41147	CfaAffx.7779.1.S1_at	0.757621	2.45744
8043	Cfa.17840.1.S1_s_at	0.757541	3.6529
11766	Cfa.2411.1.A1_at	0.756708	4.06304
42714	CfaAffx.9657.1.S1_s_at	0.756665	4.60547
39705	CfaAffx.6006.1.S1_at	0.75645	3.99452
34774	CfaAffx.28075.1.S1_at	0.756057	7.92514
27656	CfaAffx.19302.1.S1_at	0.755559	6.14436
4768	Cfa.14188.1.A1_a_at	0.755452	7.90624
2326	Cfa.12000.1.A1_at	0.755121	7.57118
42834	CfaAffx.9810.1.S1_at	0.755053	7.61748
20604	CfaAffx.10703.1.S1_at	0.754739	8.0833
36947	CfaAffx.30820.1.S1_s_at	0.753949	6.1396
8869	Cfa.18723.1.S1_s_at	0.753704	6.08449
12776	Cfa.3379.1.A1_at	0.753578	6.34386
12739	Cfa.3337.1.A1_at	0.753372	9.8911
37753	CfaAffx.3529.1.S1_at	0.753222	4.56241
33209	CfaAffx.26158.1.S1_at	0.752691	4.91071
29952	CfaAffx.22110.1.S1_s_at	0.752603	7.8674
35603	CfaAffx.29135.1.S1_s_at	0.752579	6.22752
41222	CfaAffx.7874.1.S1_at	0.752519	5.34888
32893	CfaAffx.25753.1.S1_s_at	0.752516	5.20568
40501	CfaAffx.6968.1.S1_at	0.752096	6.76201
21716	CfaAffx.12079.1.S1_s_at	0.751503	6.0566
25395	CfaAffx.16559.1.S1_s_at	0.751385	3.26034
37122	CfaAffx.3103.1.S1_at	0.751142	3.99783
8722	Cfa.18578.2.S1_at	0.751078	6.19941
21759	CfaAffx.12133.1.S1_at	0.750849	4.85605
38177	CfaAffx.4057.1.S1_at	0.750286	5.11262
11655	Cfa.2317.1.A1_at	0.74984	4.62445
35229	CfaAffx.28656.1.S1_s_at	0.749673	4.49243
24222	CfaAffx.15126.1.S1_s_at	0.7494	5.06188
3266	Cfa.12791.1.A1_at	0.7493	2.83705
6694	Cfa.1611.1.A1_s_at	0.749226	4.67238
20470	CfaAffx.1052.1.S1_s_at	0.749221	4.02159
706	Cfa.10565.1.A1_at	0.749166	2.93551
2497	Cfa.12146.1.A1_at	0.748915	5.47845
34854	CfaAffx.28168.1.S1_at	0.74873	5.39956
11089	Cfa.21153.2.S1_s_at	0.748148	5.22394
32369	CfaAffx.25141.1.S1_s_at	0.748124	7.59921
16484	Cfa.6812.1.A1_at	0.747917	7.57141
7657	Cfa.17365.1.S1_at	0.747688	8.83223
705	Cfa.10564.1.A1_at	0.747392	7.48659
11294	Cfa.21386.2.S1_at	0.747194	3.02507
30875	CfaAffx.23288.1.S1_s_at	0.74656	9.13556
25515	CfaAffx.16711.1.S1_at	0.746047	5.4095
12246	Cfa.2848.2.S1_at	0.745804	8.16816
7336	Cfa.1697.1.A1_at	0.745696	4.82873
35444	CfaAffx.28945.1.S1_s_at	0.745638	5.58096
942	Cfa.10769.1.S1_s_at	0.745624	12.6005
41720	CfaAffx.8460.1.S1_s_at	0.745482	8.04925
41115	CfaAffx.7739.1.S1_at	0.745427	5.44047
37350	CfaAffx.3132.1.S1_s_at	0.745352	6.24678
12647	Cfa.3241.1.S1_x_at	0.745239	8.5102
31617	CfaAffx.24228.1.S1_at	0.744993	5.02075
31275	CfaAffx.23818.1.S1_s_at	0.744972	7.10469
29618	CfaAffx.21714.1.S1_s_at	0.744642	4.4803
2335	Cfa.12008.1.A1_s_at	0.74464	9.80061
14837	Cfa.5340.1.A1_at	0.744584	9.01068
11164	Cfa.2124.1.A1_at	0.744542	7.76497
7928	Cfa.17731.1.S1_s_at	0.744496	5.53281
6769	Cfa.16230.1.S1_s_at	0.744023	2.78257
40407	CfaAffx.6859.1.S1_s_at	0.743725	6.97291
2729	Cfa.12340.1.A1_s_at	0.743548	7.15453
41440	CfaAffx.8116.1.S1_at	0.743133	3.40157
19560	Cfa.9503.2.A1_at	0.74295	6.89048
11673	Cfa.2333.1.S1_at	0.742747	5.31744
36298	CfaAffx.29976.1.S1_s_at	0.742711	5.15354
14838	Cfa.5340.1.A1_s_at	0.742682	9.98248
30938	CfaAffx.23366.1.S1_s_at	0.742325	8.31301
4745	Cfa.14166.2.A1_a_at	0.741995	9.3716
2752	Cfa.12359.1.A1_at	0.7415	9.28559
5260	Cfa.14645.1.A1_at	0.741348	5.0422
42499	CfaAffx.9392.1.S1_s_at	0.741347	5.62151
1770	Cfa.11525.1.A1_at	0.7411	5.52723
35177	CfaAffx.28584.1.S1_at	0.740745	5.03948
24506	CfaAffx.15456.1.S1_x_at	0.740125	6.38402
33363	CfaAffx.26344.1.S1_s_at	0.739558	4.22453
3243	Cfa.12770.1.A1_s_at	0.739101	6.68909
12115	Cfa.2730.1.S1_at	0.738947	7.74422
825	Cfa.10661.1.A1_at	0.738478	4.27223
38092	CfaAffx.3951.1.S1_x_at	0.73847	3.3187
23346	CfaAffx.14018.1.S1_s_at	0.738181	4.76616
5558	Cfa.14924.1.A1_x_at	0.738036	6.37493
36960	CfaAffx.30840.1.S1_at	0.73762	6.55821
21728	CfaAffx.12091.1.S1_s_at	0.737591	4.26754
12281	Cfa.2880.2.A1_s_at	0.737386	7.63947
12026	Cfa.2654.1.A1_at	0.737081	4.25539
26641	CfaAffx.18074.1.S1_at	0.737007	2.53317
7672	Cfa.17382.1.S1_s_at	0.736233	6.3876
35280	CfaAffx.28722.1.S1_at	0.736171	5.82903
11730	Cfa.2382.2.S1_at	0.736024	4.89848
7533	Cfa.17220.1.S1_s_at	0.735243	7.58823
8359	Cfa.18187.1.S1_at	0.734698	4.14858
4052	Cfa.13527.1.A1_at	0.734584	2.5341
38357	CfaAffx.4267.1.S1_s_at	0.734146	5.40957
6684	Cfa.16089.1.S1_s_at	0.734008	6.22079
18229	Cfa.8309.1.A1_at	0.733882	8.36266
23162	CfaAffx.13793.1.S1_s_at	0.733632	2.90661
31457	CfaAffx.24036.1.S1_at	0.733525	4.35512
28510	CfaAffx.2035.1.S1_s_at	0.733477	11.0757
27476	CfaAffx.19087.1.S1_s_at	0.733314	5.80278
7461	Cfa.17130.1.S1_s_at	0.733229	7.68041
28544	CfaAffx.20387.1.S1_s_at	0.733228	7.85996
453	Cfa.10339.1.S1_at	0.733095	8.29592
27592	CfaAffx.19230.1.S1_s_at	0.732904	4.24697
3414	Cfa.1292.1.S1_at	0.732677	7.73959
34569	CfaAffx.27850.1.S1_at	0.732529	2.74525
[truncated: 41,815 more rows]

## Sheet: Contrast6 (f)
	ID	M	A
[truncated: 43,035 more rows]

## Sheet: Contrast7 (g)
	ID	M	A
[truncated: 43,035 more rows]

## Sheet: Table S1 Legend
Table S1. Microarray analysis results; (a) LPS treated tumor enteroids versus Control tumor enteroids; (b) LPS treated IBD enteroids versus Control IBD enteroids; (c) LPS treated IBD colonoids versus Control IBD colonoids; (d) Control IBD colonoids versus Control IBD enteroids; (e) Control IBD enteroids versus Control tumor enteroids; (f) LPS treated IBD colonoids versus LPS treated IBD enteroids…
